# Supplementary material for: Evaluation of phosphate rock as the only source of phosphorus for the growth of tall and semi-dwarf durum wheat and rye plants using digital phenotyping
Source: PeerJ. 2023 Aug 29;11:e15972. doi: 10.7717/peerj.15972 (PMC10473039; doi:10.7717/peerj.15972)
Supplement: Supplemental Information 9 [file peerj-11-15972-s009.xlsx]

## Sheet: TraitFinder phenotyping data
Scan (1 - before, 2 - after 90 deg. turn)	unit	genotype	g_alias	treatment	timestamp	Digital biomass [mm³]	greenness average []	greenness bin0 [%]	greenness bin1 [%]	greenness bin2 [%]	greenness bin3 [%]	greenness bin4 [%]	greenness bin5 [%]	Height [mm]	Height Max [mm]	hue average [°]	hue bin0 [%]	hue bin1 [%]	hue bin2 [%]	hue bin3 [%]	hue bin4 [%]	hue bin5 [%]	Leaf angle [°]	Leaf area [mm²]	Leaf area index [mm²/mm²]	Leaf area (projected) [mm²]	Leaf inclination [mm²/mm²]	Light penetration depth [mm]	NDVI average []	NDVI bin0 [%]	NDVI bin1 [%]	NDVI bin2 [%]	NDVI bin3 [%]	NDVI bin4 [%]	NDVI bin5 [%]	NPCI average []	NPCI bin0 [%]	NPCI bin1 [%]	NPCI bin2 [%]	NPCI bin3 [%]	NPCI bin4 [%]	NPCI bin5 [%]	PSRI average []	PSRI bin0 [%]	PSRI bin1 [%]	PSRI bin2 [%]	PSRI bin3 [%]	PSRI bin4 [%]	PSRI bin5 [%]
1	05:01:01	Chulpan_(rye)	S._cereale_Chulpan	w/o_P	2021-03-11 15:03:05	3822.91	0.23815	0	0	0.00585	0.99415	0	0	77.524	83.633	118.259	0	0.02797	0.96618	0	0.00585	0	13.974	49.313	0.001	10.296	4.14043	16.776	0.60744	0	0	0	0.05152	0.94848	0	0.01351	0	0	0.39053	0.60947	0	0	0.00515	0	0	0.39053	0.60947	0	0
1	05:01:02	Chulpan_(rye)	S._cereale_Chulpan	w/o_P	2021-03-11 15:03:05	0	0	0	0	0	0	0	0	0	0	0	0	0	0	0	0	0	0	0	0	0	0	0	0	0	0	0	0	0	0	0	0	0	0	0	0	0	0	0	0	0	0	0	0
1	05:01:03	Chulpan_(rye)	S._cereale_Chulpan	w/o_P	2021-03-11 15:03:05	2414.86	0.05823	0	0	0.1562	0.8438	0	0	78.135	0	76.0242	0.00811	0.46325	0.48196	0.00821	0.03848	0	10.054	30.906	0.001	3.769	5.72669	54.774	0.3081	0	0	0.01707	0.98293	0	0	0.11493	0	0	0.08267	0.89632	0.02101	0	0.11483	0	0	0.08267	0.91733	0	0
1	05:02:01	LD222_Rht17_NIL	T._durum_LD222_Rht17_NIL	w/o_P	2021-03-11 15:03:05	0	0	0	0	0	0	0	0	0	0	0	0	0	0	0	0	0	0	0	0	0	0	0	0	0	0	0	0	0	0	0	0	0	0	0	0	0	0	0	0	0	0	0	0
1	05:02:02	LD222_Rht17_NIL	T._durum_LD222_Rht17_NIL	w/o_P	2021-03-11 15:03:05	0	0	0	0	0	0	0	0	0	0	0	0	0	0	0	0	0	0	0	0	0	0	0	0	0	0	0	0	0	0	0	0	0	0	0	0	0	0	0	0	0	0	0	0
1	05:02:03	LD222_Rht17_NIL	T._durum_LD222_Rht17_NIL	w/o_P	2021-03-11 15:03:05	1441.97	0.02627	0	0	0.54056	0.45944	0	0	99.741	0	200.588	0	0	0.41814	0.53447	0.04739	0	9.474	14.457	0	3.614	6.07395	26.749	0.45585	0	0	0	0.7152	0.2848	0	-0.17774	0	0.0413	0.91131	0.04739	0	0	-0.16557	0	0	0.95261	0.04739	0	0
1	05:03:01	LD222_(tall_wheat)	LD222_recurrent_parent_(tall)	w/o_P	2021-03-11 15:03:05	0	0	0	0	0	0	0	0	0	0	0	0	0	0	0	0	0	0	0	0	0	0	0	0	0	0	0	0	0	0	0	0	0	0	0	0	0	0	0	0	0	0	0	0
1	05:03:02	LD222_(tall_wheat)	LD222_recurrent_parent_(tall)	w/o_P	2021-03-11 15:03:05	1114.83	0.15034	0	0	0.08421	0.91579	0	0	106.014	0	170.557	0	0	0.75247	0.16332	0.08421	0	9.164	10.516	0	2.103	6.27744	37.202	0.4865	0	0	0	0.47365	0.52635	0	-0.23203	0	0	0.91579	0.08421	0	0	-0.19835	0	0	0.91579	0.08421	0	0
1	05:03:03	LD222_(tall_wheat)	LD222_recurrent_parent_(tall)	w/o_P	2021-03-11 15:03:05	4320.59	0.16973	0	0	0.0361	0.9639	0	0	104.758	118.231	156.638	0	0	0.85089	0.14911	0	0	9.057	41.244	0.001	7.317	6.35082	23.707	0.50818	0	0	0	0.35426	0.64574	0	-0.17762	0	0	0.93495	0.06505	0	0	-0.1418	0	0	0.93495	0.06505	0	0
1	05:04:01	Chulpan_(rye)	S._cereale_Chulpan	Phosphorite	2021-03-11 15:03:05	0	0	0	0	0	0	0	0	0	0	0	0	0	0	0	0	0	0	0	0	0	0	0	0	0	0	0	0	0	0	0	0	0	0	0	0	0	0	0	0	0	0	0	0
1	05:04:02	Chulpan_(rye)	S._cereale_Chulpan	Phosphorite	2021-03-11 15:03:05	318.079	-0.0352	0	0	1	0	0	0	41.221	0	331.737	0	0.58097	0	0.31576	0.10327	0	12.408	7.716	0	0.857	4.65308	7.385	0.24234	0	0	0	1	0	0	0.04869	0	0	0.41903	0.58097	0	0	0.05817	0	0	0.41903	0.58097	0	0
1	05:04:03	Chulpan_(rye)	S._cereale_Chulpan	Phosphorite	2021-03-11 15:03:05	915.065	0.02244	0	0	0.43461	0.56539	0	0	89.534	0	31.4801	0	0.76711	0	0	0.23289	0	20.105	10.22	0	1.947	2.90889	26.509	0.10665	0	0	0	1	0	0	0.17891	0	0	0	1	0	0	0.23906	0	0	0	1	0	0
1	05:05:01	LD222_Rht17_NIL	T._durum_LD222_Rht17_NIL	Phosphorite	2021-03-11 15:03:05	212.304	0.13231	0	0	0.09255	0.90745	0	0	76.791	0	69.9508	0	0.79459	0.20541	0	0	0	10.272	2.765	0	0.691	5.60661	17.741	0.42647	0	0	0	0.70203	0.29797	0	0.24112	0	0	0.20541	0.5069	0.28768	0	0.18193	0	0	0.20541	0.79459	0	0
1	05:05:02	LD222_Rht17_NIL	T._durum_LD222_Rht17_NIL	Phosphorite	2021-03-11 15:03:05	0	0	0	0	0	0	0	0	0	0	0	0	0	0	0	0	0	0	0	0	0	0	0	0	0	0	0	0	0	0	0	0	0	0	0	0	0	0	0	0	0	0	0	0
1	05:05:03	LD222_Rht17_NIL	T._durum_LD222_Rht17_NIL	Phosphorite	2021-03-11 15:03:05	5149.48	0.14393	0	0	0.13413	0.83829	0.02758	0	104.423	106.172	118.724	0	0.35642	0.50326	0.12848	0.01184	0	12.235	49.314	0.001	11.289	4.71776	19.741	0.38674	0	0	0.01805	0.49165	0.4903	0	0.01419	0	0	0.5111	0.4889	0	0	0.07506	0	0	0.5111	0.47219	0.01671	0
1	05:06:01	LD222_(tall_wheat)	LD222_recurrent_parent_(tall)	Phosphorite	2021-03-11 15:03:05	4528.41	0.12077	0	0	0.15158	0.84842	0	0	129.219	130.641	148.155	0	0.18652	0.61699	0.18205	0.01444	0	24.823	35.045	0.001	15.628	2.38185	16.526	0.40412	0	0	0.01156	0.67906	0.30938	0	-0.08711	0	0.01342	0.73296	0.25362	0	0	-0.06359	0	0	0.74638	0.25362	0	0
1	05:06:02	LD222_(tall_wheat)	LD222_recurrent_parent_(tall)	Phosphorite	2021-03-11 15:03:05	0	0	0	0	0	0	0	0	0	0	0	0	0	0	0	0	0	0	0	0	0	0	0	0	0	0	0	0	0	0	0	0	0	0	0	0	0	0	0	0	0	0	0	0
1	05:06:03	LD222_(tall_wheat)	LD222_recurrent_parent_(tall)	Phosphorite	2021-03-11 15:03:05	822.947	0.01757	0	0	0.48607	0.51393	0	0	95.419	0	38.0978	0	1	0	0	0	0	8.166	8.625	0	1.568	7.03795	29.184	0.0571	0	0	0.20486	0.79514	0	0	0.33659	0	0	0	1	0	0	0.4551	0	0	0	0.51279	0.48721	0
1	05:07:01	Chulpan_(rye)	S._cereale_Chulpan	KH2PO4	2021-03-11 15:03:05	1701.24	0.1379	0	0	0.06539	0.93461	0	0	75.739	0	131.65	0	0.1018	0.83281	0	0.06539	0	7.285	22.462	0.001	2.246	7.88364	14.592	0.34379	0	0	0	1	0	0	-0.03038	0	0	0.65831	0.34169	0	0	-0.03558	0	0	0.65831	0.34169	0	0
1	05:07:02	Chulpan_(rye)	S._cereale_Chulpan	KH2PO4	2021-03-11 15:03:05	8436.33	0.09138	0	0	0.28404	0.71086	0.0051	0	48.107	53.735	112.981	0	0.30537	0.41861	0.15473	0.1213	0	25.403	175.364	0.005	74.837	2.33096	20.335	0.44444	0	0	0.00356	0.58749	0.40896	0	0.06123	0	0	0.48875	0.48071	0.03054	0	0.04096	0	0	0.48875	0.48376	0.02748	0
1	05:07:03	Chulpan_(rye)	S._cereale_Chulpan	KH2PO4	2021-03-11 15:03:05	47.668	0.02655	0	0	0	1	0	0	77.765	0	75	0	1	0	0	0	0	3.024	0.613	0	0	18.9399	0	0.19774	0	0	0	1	0	0	0.03273	0	0	0	1	0	0	0.04245	0	0	0	1	0	0
1	05:08:01	LD222_Rht17_NIL	T._durum_LD222_Rht17_NIL	KH2PO4	2021-03-11 15:03:05	6657.41	0.15742	0	0	0.09688	0.90312	0	0	65.766	66.07	70.9512	0	0.62984	0.32843	0.02141	0.02032	0	17.149	101.229	0.003	31.859	3.39101	34.885	0.43001	0	0	0	0.53568	0.46432	0	0.24932	0	0	0.11304	0.86088	0.02607	0	0.19013	0	0	0.11304	0.85778	0.02918	0
1	05:08:02	LD222_Rht17_NIL	T._durum_LD222_Rht17_NIL	KH2PO4	2021-03-11 15:03:05	382.156	0.25093	0	0	0	1	0	0	56.777	0	104.522	0	0.27927	0.72073	0	0	0	18.26	6.731	0	1.553	3.19118	5.8	0.5723	0	0	0	0	1	0	0.10972	0	0	0.20261	0.79739	0	0	0.05147	0	0	0.20261	0.79739	0	0
1	05:08:03	LD222_Rht17_NIL	T._durum_LD222_Rht17_NIL	KH2PO4	2021-03-11 15:03:05	0	0	0	0	0	0	0	0	0	0	0	0	0	0	0	0	0	0	0	0	0	0	0	0	0	0	0	0	0	0	0	0	0	0	0	0	0	0	0	0	0	0	0	0
1	05:09:01	LD222_(tall_wheat)	LD222_recurrent_parent_(tall)	KH2PO4	2021-03-11 15:03:05	1869.4	0.14224	0	0	0.07809	0.92191	0	0	100.547	0	88.5535	0	0.58124	0.41876	0	0	0	12.506	18.592	0.001	2.479	4.61738	21.482	0.45484	0	0	0	0.72035	0.27965	0	0.11659	0	0	0.26547	0.73453	0	0	0.08094	0	0	0.26547	0.73453	0	0
1	05:09:02	LD222_(tall_wheat)	LD222_recurrent_parent_(tall)	KH2PO4	2021-03-11 15:03:05	6801.06	0.29028	0	0	0	1	0	0	133.779	136.297	112.472	0	0.18061	0.81939	0	0	0	21.544	50.838	0.001	19.743	2.72294	61.081	0.59695	0	0	0	0.17114	0.82886	0	0.06382	0	0	0.4324	0.55364	0.01396	0	0.03606	0	0	0.4324	0.5676	0	0
1	05:09:03	LD222_(tall_wheat)	LD222_recurrent_parent_(tall)	KH2PO4	2021-03-11 15:03:05	0	0	0	0	0	0	0	0	0	0	0	0	0	0	0	0	0	0	0	0	0	0	0	0	0	0	0	0	0	0	0	0	0	0	0	0	0	0	0	0	0	0	0	0
2	05:01:01	Chulpan_(rye)	S._cereale_Chulpan	w/o_P	2021-03-11 15:16:43	0	0	0	0	0	0	0	0	0	0	0	0	0	0	0	0	0	0	0	0	0	0	0	0	0	0	0	0	0	0	0	0	0	0	0	0	0	0	0	0	0	0	0	0
2	05:01:02	Chulpan_(rye)	S._cereale_Chulpan	w/o_P	2021-03-11 15:16:43	0	0	0	0	0	0	0	0	0	0	0	0	0	0	0	0	0	0	0	0	0	0	0	0	0	0	0	0	0	0	0	0	0	0	0	0	0	0	0	0	0	0	0	0
2	05:01:03	Chulpan_(rye)	S._cereale_Chulpan	w/o_P	2021-03-11 15:16:43	0	0	0	0	0	0	0	0	0	0	0	0	0	0	0	0	0	0	0	0	0	0	0	0	0	0	0	0	0	0	0	0	0	0	0	0	0	0	0	0	0	0	0	0
2	05:02:01	LD222_Rht17_NIL	T._durum_LD222_Rht17_NIL	w/o_P	2021-03-11 15:16:43	2097.86	0.10035	0	0	0.08375	0.91625	0	0	93.868	0	93.7219	0	0.4935	0.42675	0.05184	0.02791	0	11.84	22.349	0.001	2.629	4.87288	7.743	0.37506	0	0	0	0.65375	0.34625	0	0.06484	0	0	0.42789	0.57211	0	0	0.08097	0	0	0.42789	0.57211	0	0
2	05:02:02	LD222_Rht17_NIL	T._durum_LD222_Rht17_NIL	w/o_P	2021-03-11 15:16:43	4285.52	0.04404	0	0	0.34741	0.65259	0	0	74.932	54.681	96.1657	0	0.4203	0.26826	0.22858	0.08286	0	16.537	57.192	0.002	16.522	3.51287	47.78	0.38466	0	0	0	0.73184	0.26816	0	0.00927	0	0	0.44687	0.55313	0	0	0.03214	0	0	0.44687	0.55313	0	0
2	05:02:03	LD222_Rht17_NIL	T._durum_LD222_Rht17_NIL	w/o_P	2021-03-11 15:16:43	2733.08	0.09892	0	0	0.10647	0.89353	0	0	75.499	0	131.232	0	0.28655	0.48884	0.22461	0	0	6.549	36.2	0.001	4.763	8.76496	27.772	0.31392	0	0	0	1	0	0	-0.02914	0	0	0.61238	0.38762	0	0	-0.03269	0	0	0.61238	0.38762	0	0
2	05:03:01	LD222_(tall_wheat)	LD222_recurrent_parent_(tall)	w/o_P	2021-03-11 15:16:43	5976.33	0.17684	0	0	0.05245	0.94755	0	0	119.335	123.658	150.611	0	0	0.78535	0.21465	0	0	10.021	50.08	0.001	8.232	5.74569	17.885	0.49374	0	0	0	0.35371	0.64629	0	-0.10725	0	0	0.85586	0.14414	0	0	-0.08534	0	0	0.85586	0.14414	0	0
2	05:03:02	LD222_(tall_wheat)	LD222_recurrent_parent_(tall)	w/o_P	2021-03-11 15:16:43	10983.8	0.14039	0	0	0.20274	0.79726	0	0	120.411	127.333	138.039	0.01711	0.14975	0.52284	0.3103	0	0	13.273	91.22	0.003	21.367	4.35499	31.565	0.42747	0	0	0	0.61697	0.38303	0	-0.05147	0	0	0.58053	0.41947	0	0	-0.06953	0	0	0.58053	0.41947	0	0
2	05:03:03	LD222_(tall_wheat)	LD222_recurrent_parent_(tall)	w/o_P	2021-03-11 15:16:43	2369.93	0.06202	0	0	0.19491	0.80509	0	0	130.277	0	69.7155	0	0.52561	0.37116	0	0.10323	0	6.738	18.192	0.001	2.872	8.51954	70.97	0.22281	0	0	0	1	0	0	0.08072	0	0	0.15703	0.84297	0	0	0.09946	0	0	0.15703	0.84297	0	0
2	05:04:01	Chulpan_(rye)	S._cereale_Chulpan	Phosphorite	2021-03-11 15:16:43	863.495	0.07909	0	0	0	1	0	0	63.338	0	57.7129	0	0.81727	0.18273	0	0	0	13.054	13.633	0	2.597	4.42642	6.243	0.2337	0	0	0	1	0	0	0.19575	0	0	0	1	0	0	0.21608	0	0	0	1	0	0
2	05:04:02	Chulpan_(rye)	S._cereale_Chulpan	Phosphorite	2021-03-11 15:16:43	2758.94	0.01721	0	0	0.37235	0.62765	0	0	98.935	0	195.086	0	0.0468	0.35629	0.47129	0.12562	0	13.858	27.887	0.001	7.968	4.1744	10.48	0.36169	0	0	0	0.91931	0.08069	0	-0.08705	0	0	0.87104	0.12895	0	0	-0.0937	0	0	0.87104	0.12895	0	0
2	05:04:03	Chulpan_(rye)	S._cereale_Chulpan	Phosphorite	2021-03-11 15:16:43	5888.06	0.08516	0	0	0.18928	0.81072	0	0	88.83	91.408	149.021	0	0.13353	0.58098	0.25054	0.03496	0	12.499	66.285	0.002	12.347	4.61974	16.613	0.35847	0	0	0	0.74407	0.25593	0	-0.05033	0	0	0.67695	0.32305	0	0	-0.04637	0	0	0.67695	0.32305	0	0
2	05:05:01	LD222_Rht17_NIL	T._durum_LD222_Rht17_NIL	Phosphorite	2021-03-11 15:16:43	1113.31	0.12126	0	0	0	1	0	0	97.276	0	101.726	0	0.38832	0.49513	0.11655	0	0	10.256	11.445	0	0.88	5.61517	8.16	0.32849	0	0	0	1	0	0	0.07389	0	0	0.28013	0.71987	0	0	0.07707	0	0	0.28013	0.71987	0	0
2	05:05:02	LD222_Rht17_NIL	T._durum_LD222_Rht17_NIL	Phosphorite	2021-03-11 15:16:43	0	0	0	0	0	0	0	0	0	0	0	0	0	0	0	0	0	0	0	0	0	0	0	0	0	0	0	0	0	0	0	0	0	0	0	0	0	0	0	0	0	0	0	0
2	05:05:03	LD222_Rht17_NIL	T._durum_LD222_Rht17_NIL	Phosphorite	2021-03-11 15:16:43	2929.58	0.06271	0	0	0.18946	0.81054	0	0	77.437	0	106.836	0	0.39	0.35284	0.17177	0.08538	0	10.116	37.832	0.001	8.276	5.69198	23.584	0.27559	0	0	0	1	0	0	0.0494	0	0	0.42885	0.57115	0	0	0.05858	0	0	0.42885	0.57115	0	0
2	05:06:01	LD222_(tall_wheat)	LD222_recurrent_parent_(tall)	Phosphorite	2021-03-11 15:16:43	20242.8	0.18577	0	0	0.11175	0.86367	0.02458	0	125.768	131.799	105.767	0	0.32681	0.55714	0.10218	0.01386	0	19.271	160.954	0.005	49.524	3.02972	81.427	0.44799	0	0	0	0.53831	0.4617	0	0.08309	0	0	0.422	0.54297	0.03502	0	0.06721	0	0	0.422	0.54391	0.03409	0
2	05:06:02	LD222_(tall_wheat)	LD222_recurrent_parent_(tall)	Phosphorite	2021-03-11 15:16:43	4228.53	0.02926	0	0	0.29032	0.70968	0	0	138.765	0	200.337	0	0	0.18697	0.81303	0	0	13.28	30.473	0.001	5.835	4.35268	12.38	0.41321	0	0	0	0.85966	0.14034	0	-0.22186	0	0	1	0	0	0	-0.23993	0	0.04668	0.95332	0	0	0
2	05:06:03	LD222_(tall_wheat)	LD222_recurrent_parent_(tall)	Phosphorite	2021-03-11 15:16:43	0	0	0	0	0	0	0	0	0	0	0	0	0	0	0	0	0	0	0	0	0	0	0	0	0	0	0	0	0	0	0	0	0	0	0	0	0	0	0	0	0	0	0	0
2	05:07:01	Chulpan_(rye)	S._cereale_Chulpan	KH2PO4	2021-03-11 15:16:43	0	0	0	0	0	0	0	0	0	0	0	0	0	0	0	0	0	0	0	0	0	0	0	0	0	0	0	0	0	0	0	0	0	0	0	0	0	0	0	0	0	0	0	0
2	05:07:02	Chulpan_(rye)	S._cereale_Chulpan	KH2PO4	2021-03-11 15:16:43	2822.91	0.13441	0	0	0.10232	0.89768	0	0	40.119	43.992	98.941	0	0.31442	0.66978	0.00807	0.00773	0	23.946	70.363	0.002	27.624	2.46361	17.659	0.54839	0	0	0	0.24699	0.75301	0	0.06037	0	0	0.32972	0.67028	0	0	0.03659	0	0	0.32972	0.67028	0	0
2	05:07:03	Chulpan_(rye)	S._cereale_Chulpan	KH2PO4	2021-03-11 15:16:43	3460.71	0.05578	0	0	0.21694	0.78306	0	0	112.581	0	98.2751	0.00836	0.37929	0.42178	0.13242	0.05816	0	9.404	30.74	0.001	3.153	6.11838	55.455	0.31177	0	0	0	0.89085	0.10915	0	0.01691	0	0	0.46732	0.53268	0	0	0.03468	0	0	0.46732	0.53268	0	0
2	05:08:01	LD222_Rht17_NIL	T._durum_LD222_Rht17_NIL	KH2PO4	2021-03-11 15:16:43	2411.47	0.06234	0	0	0.28377	0.71623	0	0	92.022	0	126.09	0	0.13168	0.52985	0.16104	0.17743	0	16.312	26.205	0.001	6.551	3.55994	49.376	0.35358	0	0	0	0.76429	0.23571	0	-0.02418	0	0	0.53047	0.46953	0	0	-0.00187	0	0	0.53047	0.46953	0	0
2	05:08:02	LD222_Rht17_NIL	T._durum_LD222_Rht17_NIL	KH2PO4	2021-03-11 15:16:43	12632.1	0.14981	0	0	0.05313	0.94687	0	0	91.614	96.78	132.045	0.00415	0.20434	0.69539	0.08808	0.00805	0	18.957	137.885	0.004	44.442	3.07791	52.745	0.49145	0	0	0	0.46903	0.53097	0	-0.08133	0	0.01063	0.67358	0.31579	0	0	-0.04182	0	0	0.68421	0.31579	0	0
2	05:08:03	LD222_Rht17_NIL	T._durum_LD222_Rht17_NIL	KH2PO4	2021-03-11 15:16:43	10436.5	0.20355	0	0	0.01099	0.98901	0	0	100.138	70.678	114.54	0	0.21598	0.77099	0.01303	0	0	15.108	104.221	0.003	27.267	3.83611	61.603	0.47523	0	0	0	0.53558	0.46442	0	0.0113	0	0	0.47413	0.52587	0	0	0.0162	0	0.00619	0.46793	0.52587	0	0
2	05:09:01	LD222_(tall_wheat)	LD222_recurrent_parent_(tall)	KH2PO4	2021-03-11 15:16:43	3703.01	0.14933	0	0	0.10257	0.89743	0	0	126.597	130.668	151.853	0	0.01583	0.82818	0.14297	0.01303	0	11.323	29.25	0.001	8.044	5.09229	16.715	0.48994	0	0	0	0.63758	0.36242	0	-0.13933	0	0	0.92759	0.07241	0	0	-0.11451	0	0	0.92759	0.07241	0	0
2	05:09:02	LD222_(tall_wheat)	LD222_recurrent_parent_(tall)	KH2PO4	2021-03-11 15:16:43	31461.2	0.1648	0	0	0.04706	0.95031	0.00264	0	131.725	137.223	136.623	0.00179	0.1127	0.80712	0.06316	0.01523	0	20.48	238.841	0.007	85.808	2.85778	75.202	0.49905	0	0	0	0.42064	0.57936	0	-0.07258	0	0	0.74216	0.25784	0	0	-0.04636	0	0	0.74216	0.25784	0	0
2	05:09:03	LD222_(tall_wheat)	LD222_recurrent_parent_(tall)	KH2PO4	2021-03-11 15:16:43	9793.44	0.15605	0	0	0.06445	0.92496	0.0106	0	134.084	93.737	144.62	0	0.03995	0.73362	0.22643	0	0	11.765	73.04	0.002	12.055	4.90331	60.087	0.40003	0	0	0	0.73558	0.26442	0	-0.08273	0	0	0.66903	0.33097	0	0	-0.08562	0	0	0.66903	0.33097	0	0
1	06:01:01	Chulpan_(rye)	S._cereale_Chulpan	w/o_P	2021-03-11 15:28:54	455.593	0.16318	0	0	0	1	0	0	72.579	0	129.685	0	0.10914	0.89086	0	0	0	17.054	6.277	0	2.092	3.4094	1.889	0.44641	0	0	0	0.66472	0.33528	0	-0.04234	0	0	0.76528	0.23472	0	0	-0.03475	0	0	0.76528	0.23472	0	0
1	06:01:02	Chulpan_(rye)	S._cereale_Chulpan	w/o_P	2021-03-11 15:28:54	1194.64	0.02886	0	0	0.38014	0.61986	0	0	89.119	0	174.102	0	0	0.61986	0.22782	0.15231	0	9.709	13.405	0	1.341	5.9281	5.6	0.2674	0	0	0	1	0	0	-0.02369	0	0	0.94468	0.05532	0	0	-0.02816	0	0	0.94468	0.05532	0	0
1	06:01:03	Chulpan_(rye)	S._cereale_Chulpan	w/o_P	2021-03-11 15:28:54	0	0	0	0	0	0	0	0	0	0	0	0	0	0	0	0	0	0	0	0	0	0	0	0	0	0	0	0	0	0	0	0	0	0	0	0	0	0	0	0	0	0	0	0
1	06:02:01	LD222_Rht17_NIL	T._durum_LD222_Rht17_NIL	w/o_P	2021-03-11 15:28:54	1713.64	0.23513	0	0	0	1	0	0	80.908	82.098	115.861	0	0.17514	0.82486	0	0	0	8.632	21.18	0.001	5.776	6.66068	40.375	0.57703	0	0	0	0.24918	0.75082	0	0.01999	0	0	0.43507	0.56493	0	0	0.00946	0	0	0.43507	0.56493	0	0
1	06:02:02	LD222_Rht17_NIL	T._durum_LD222_Rht17_NIL	w/o_P	2021-03-11 15:28:54	2801.78	0.06746	0	0	0.24797	0.75203	0	0	77.972	84.712	178.876	0	0.05341	0.49556	0.37163	0.0794	0	13.791	35.933	0.001	9.425	4.19432	19.216	0.49219	0	0	0	0.39683	0.60317	0	-0.11026	0	0	0.90437	0.09563	0	0	-0.07612	0	0	0.90437	0.09563	0	0
1	06:02:03	LD222_Rht17_NIL	T._durum_LD222_Rht17_NIL	w/o_P	2021-03-11 15:28:54	0	0	0	0	0	0	0	0	0	0	0	0	0	0	0	0	0	0	0	0	0	0	0	0	0	0	0	0	0	0	0	0	0	0	0	0	0	0	0	0	0	0	0	0
1	06:03:01	LD222_(tall_wheat)	LD222_recurrent_parent_(tall)	w/o_P	2021-03-11 15:28:54	6614.62	0.02542	0	0	0.35996	0.64004	0	0	118.028	124.072	179.9	0	0.1256	0.35029	0.36567	0.15843	0	21.863	56.043	0.002	21.377	2.68519	26.015	0.3773	0	0	0	0.80259	0.19741	0	-0.09411	0	0.01941	0.65589	0.32469	0	0	-0.07633	0	0	0.67531	0.32469	0	0
1	06:03:02	LD222_(tall_wheat)	LD222_recurrent_parent_(tall)	w/o_P	2021-03-11 15:28:54	179.444	0.23013	0	0	0	1	0	0	85.381	0	141.259	0	0	1	0	0	0	28.175	2.102	0	1.051	2.11776	1.1	0.52767	0	0	0	0.49906	0.50094	0	-0.13921	0	0	1	0	0	0	-0.09495	0	0	1	0	0	0
1	06:03:03	LD222_(tall_wheat)	LD222_recurrent_parent_(tall)	w/o_P	2021-03-11 15:28:54	4140.69	0.16411	0	0	0.06116	0.93884	0	0	94.325	106.988	129.83	0	0.14812	0.76699	0.07342	0.01147	0	9.504	43.898	0.001	6.968	6.05463	29.863	0.4354	0	0	0.03587	0.70166	0.26247	0	-0.04387	0	0	0.66626	0.33374	0	0	-0.02728	0	0	0.66626	0.33374	0	0
1	06:04:01	Chulpan_(rye)	S._cereale_Chulpan	Phosphorite	2021-03-11 15:28:54	3343.32	0.10444	0	0	0.15106	0.84894	0	0	85.136	0	171.29	0	0.01198	0.5994	0.38863	0	0	12.275	39.271	0.001	6.412	4.70278	38.347	0.47436	0	0	0	0.61219	0.38781	0	-0.17195	0	0.00652	0.96949	0.02399	0	0	-0.16961	0	0.02593	0.95008	0.02399	0	0
1	06:04:02	Chulpan_(rye)	S._cereale_Chulpan	Phosphorite	2021-03-11 15:28:54	7200.04	0.03418	0	0	0.30492	0.69508	0	0	84.003	92.387	186.735	0.00652	0.05731	0.39682	0.45757	0.08179	0	10.799	85.711	0.002	17.142	5.33588	26.693	0.27756	0	0	0	1	0	0	-0.08481	0	0	0.86729	0.13271	0	0	-0.10339	0	0	0.86729	0.13271	0	0
1	06:04:03	Chulpan_(rye)	S._cereale_Chulpan	Phosphorite	2021-03-11 15:28:54	3461.13	0.03714	0	0	0.28908	0.71092	0	0	71.95	0	65.9103	0	0.5641	0.25037	0.11274	0.07279	0	11.377	48.105	0.001	10.176	5.06816	41.986	0.21685	0	0	0	1	0	0	0.0734	0	0	0.27539	0.72461	0	0	0.09852	0	0	0.27539	0.72461	0	0
1	06:05:01	LD222_Rht17_NIL	T._durum_LD222_Rht17_NIL	Phosphorite	2021-03-11 15:28:54	0	0	0	0	0	0	0	0	0	0	0	0	0	0	0	0	0	0	0	0	0	0	0	0	0	0	0	0	0	0	0	0	0	0	0	0	0	0	0	0	0	0	0	0
1	06:05:02	LD222_Rht17_NIL	T._durum_LD222_Rht17_NIL	Phosphorite	2021-03-11 15:28:54	0	0	0	0	0	0	0	0	0	0	0	0	0	0	0	0	0	0	0	0	0	0	0	0	0	0	0	0	0	0	0	0	0	0	0	0	0	0	0	0	0	0	0	0
1	06:05:03	LD222_Rht17_NIL	T._durum_LD222_Rht17_NIL	Phosphorite	2021-03-11 15:28:54	51.651	0.05325	0	0	0	1	0	0	85.619	0	183	0	0	0	1	0	0	22.146	0.603	0	0.603	2.6525	0	0.55836	0	0	0	0	1	0	-0.125	0	0	1	0	0	0	-0.08097	0	0	1	0	0	0
1	06:06:01	LD222_(tall_wheat)	LD222_recurrent_parent_(tall)	Phosphorite	2021-03-11 15:28:54	0	0	0	0	0	0	0	0	0	0	0	0	0	0	0	0	0	0	0	0	0	0	0	0	0	0	0	0	0	0	0	0	0	0	0	0	0	0	0	0	0	0	0	0
1	06:06:02	LD222_(tall_wheat)	LD222_recurrent_parent_(tall)	Phosphorite	2021-03-11 15:28:54	8462.21	0.09421	0	0	0.18337	0.81663	0	0	129.753	136.924	60.5598	0	0.66146	0.23297	0.03452	0.07105	0	18.618	65.218	0.002	20.114	3.13193	65.067	0.29436	0	0	0.01734	0.88412	0.09854	0	0.21607	0	0	0.13007	0.84074	0.02919	0	0.20719	0	0	0.13007	0.79435	0.07559	0
1	06:06:03	LD222_(tall_wheat)	LD222_recurrent_parent_(tall)	Phosphorite	2021-03-11 15:28:54	0	0	0	0	0	0	0	0	0	0	0	0	0	0	0	0	0	0	0	0	0	0	0	0	0	0	0	0	0	0	0	0	0	0	0	0	0	0	0	0	0	0	0	0
1	06:07:01	Chulpan_(rye)	S._cereale_Chulpan	KH2PO4	2021-03-11 15:28:54	58.722	-0.0032	0	0	0.49938	0.50062	0	0	42.514	0	31.9443	0	1	0	0	0	0	21.607	1.381	0	0.691	2.71538	0.1	0.1323	0	0	0	1	0	0	0.2605	0	0	0	1	0	0	0.32169	0	0	0	1	0	0
1	06:07:02	Chulpan_(rye)	S._cereale_Chulpan	KH2PO4	2021-03-11 15:28:54	6269.51	0.06725	0	0	0.19819	0.80181	0	0	72.32	76.825	129.597	0	0.30275	0.4564	0.20902	0.03183	0	13.56	86.692	0.003	21.987	4.2645	32.193	0.40085	0	0	0	0.71484	0.28516	0	-0.04128	0	0	0.54773	0.45227	0	0	-0.01869	0	0	0.54773	0.45227	0	0
1	06:07:03	Chulpan_(rye)	S._cereale_Chulpan	KH2PO4	2021-03-11 15:28:54	13665.2	0.05821	0	0	0.24438	0.75562	0	0	102.4	106.134	77.272	0	0.53216	0.31512	0.09127	0.06145	0	15.297	133.45	0.004	39.513	3.78986	51.242	0.27796	0	0	0.00448	0.95287	0.04266	0	0.0654	0	0	0.32283	0.67717	0	0	0.08964	0	0	0.32283	0.66038	0.0168	0
1	06:08:01	LD222_Rht17_NIL	T._durum_LD222_Rht17_NIL	KH2PO4	2021-03-11 15:28:54	0	0	0	0	0	0	0	0	0	0	0	0	0	0	0	0	0	0	0	0	0	0	0	0	0	0	0	0	0	0	0	0	0	0	0	0	0	0	0	0	0	0	0	0
1	06:08:02	LD222_Rht17_NIL	T._durum_LD222_Rht17_NIL	KH2PO4	2021-03-11 15:28:54	0	0	0	0	0	0	0	0	0	0	0	0	0	0	0	0	0	0	0	0	0	0	0	0	0	0	0	0	0	0	0	0	0	0	0	0	0	0	0	0	0	0	0	0
1	06:08:03	LD222_Rht17_NIL	T._durum_LD222_Rht17_NIL	KH2PO4	2021-03-11 15:28:54	564.559	0.12207	0	0	0	1	0	0	75.312	0	119.268	0	0.31857	0.55394	0.12749	0	0	5.931	7.496	0	0.833	9.67361	32.2	0.34612	0	0	0	0.74503	0.25497	0	0.03796	0	0	0.53909	0.46091	0	0	0.06439	0	0	0.53909	0.46091	0	0
1	06:09:01	LD222_(tall_wheat)	LD222_recurrent_parent_(tall)	KH2PO4	2021-03-11 15:28:54	12912.7	0.33651	0	0	0.01894	0.85652	0.12454	0	108.625	112.548	108.601	0	0.11896	0.8621	0.0067	0.01223	0	20.056	118.874	0.003	37.209	2.91566	42.577	0.64354	0	0	0	0.12587	0.87413	0	0.12713	0	0	0.23704	0.73803	0.02493	0	0.04332	0	0	0.23704	0.76296	0	0
1	06:09:02	LD222_(tall_wheat)	LD222_recurrent_parent_(tall)	KH2PO4	2021-03-11 15:28:54	1393.97	0.21903	0	0	0	1	0	0	121.812	0	98.0703	0	0.31063	0.68937	0	0	0	16.435	11.444	0	3.433	3.53404	47.589	0.44924	0	0	0	0.60896	0.39104	0	0.14151	0	0	0.12865	0.87135	0	0	0.10887	0	0	0.12865	0.87135	0	0
1	06:09:03	LD222_(tall_wheat)	LD222_recurrent_parent_(tall)	KH2PO4	2021-03-11 15:28:54	5466.02	0.13268	0	0	0.01812	0.98188	0	0	134.679	139.418	124.681	0	0.18577	0.7384	0.05771	0.01812	0	14.379	40.586	0.001	8.455	4.02624	42.688	0.38947	0	0	0.02557	0.61691	0.35752	0	-0.00674	0	0	0.67555	0.32445	0	0	0.0201	0	0	0.67555	0.32445	0	0
2	06:01:01	Chulpan_(rye)	S._cereale_Chulpan	w/o_P	2021-03-11 15:34:19	833.386	0.0472	0	0	0.16906	0.83094	0	0	66.343	0	37.3502	0	0.90672	0	0	0.09328	0	8.1	12.562	0	0	7.09465	11.892	0.20202	0	0	0	1	0	0	0.26315	0	0	0	1	0	0	0.29464	0	0	0	0.88569	0.11431	0
2	06:01:02	Chulpan_(rye)	S._cereale_Chulpan	w/o_P	2021-03-11 15:34:19	0	0	0	0	0	0	0	0	0	0	0	0	0	0	0	0	0	0	0	0	0	0	0	0	0	0	0	0	0	0	0	0	0	0	0	0	0	0	0	0	0	0	0	0
2	06:01:03	Chulpan_(rye)	S._cereale_Chulpan	w/o_P	2021-03-11 15:34:19	1201.98	0.08433	0	0	0.28435	0.64706	0.06859	0	51.722	0	53.1418	0.02975	0.50756	0.34228	0	0.1204	0	8.301	23.239	0.001	2.999	6.92476	15.066	0.38628	0	0	0	0.81953	0.18047	0	0.21749	0	0	0	1	0	0	0.16042	0	0	0	1	0	0
2	06:02:01	LD222_Rht17_NIL	T._durum_LD222_Rht17_NIL	w/o_P	2021-03-11 15:34:19	789.097	-0.01625	0	0	0.48415	0.51585	0	0	42.73	0	314.037	0	0.30687	0.16808	0.23996	0.2851	0	17.868	18.467	0.001	5.682	3.25884	16.04	0.3188	0	0	0	0.87251	0.12749	0	0.01284	0	0	0.4942	0.5058	0	0	0.03863	0	0	0.4942	0.5058	0	0
2	06:02:02	LD222_Rht17_NIL	T._durum_LD222_Rht17_NIL	w/o_P	2021-03-11 15:34:19	7317	0.07946	0	0	0.25686	0.74314	0	0	87.292	92.46	102.584	0	0.45198	0.2355	0.28937	0.02315	0	17.233	83.822	0.002	23.761	3.37504	36.384	0.3283	0	0	0.032	0.75166	0.21634	0	0.09641	0	0	0.4212	0.54082	0.03798	0	0.09132	0	0	0.4212	0.49947	0.07934	0
2	06:02:03	LD222_Rht17_NIL	T._durum_LD222_Rht17_NIL	w/o_P	2021-03-11 15:34:19	3395.92	0.08242	0	0	0.12666	0.87334	0	0	78.598	0	83.9064	0	0.52894	0.38847	0.02174	0.06085	0	7.037	43.206	0.001	4.501	8.16016	18.785	0.28814	0	0	0	1	0	0	0.08066	0	0	0.21746	0.78254	0	0	0.09035	0	0	0.21746	0.78254	0	0
2	06:03:01	LD222_(tall_wheat)	LD222_recurrent_parent_(tall)	w/o_P	2021-03-11 15:34:19	15889.6	0.25276	0	0	0.01557	0.96707	0.01736	0	123.172	127.464	100.12	0	0.30702	0.68643	0.00656	0	0	18.602	129.004	0.004	40.405	3.13456	71.134	0.53621	0	0	0	0.32107	0.67893	0	0.14337	0	0	0.28453	0.6786	0.03686	0	0.08908	0	0	0.28453	0.71053	0.00494	0
2	06:03:02	LD222_(tall_wheat)	LD222_recurrent_parent_(tall)	w/o_P	2021-03-11 15:34:19	12172.2	0.104	0	0	0.10041	0.89959	0	0	109.546	114.055	130.428	0	0.28858	0.4338	0.25726	0.02036	0	17.799	111.115	0.003	32.681	3.27107	29.371	0.39712	0	0	0.01173	0.70712	0.28115	0	-0.01124	0	0	0.54144	0.45856	0	0	-0.00234	0	0	0.54144	0.41949	0.03907	0
2	06:03:03	LD222_(tall_wheat)	LD222_recurrent_parent_(tall)	w/o_P	2021-03-11 15:34:19	1272.35	0.02702	0	0	0.51592	0.48408	0	0	121.597	0	31.4504	0	0.59006	0	0.13082	0.27912	0	9.586	10.464	0	2.616	6.00358	8.88	0.18408	0	0	0	1	0	0	0.06897	0	0	0.19327	0.80673	0	0	0.08212	0	0	0.19327	0.80673	0	0
2	06:04:01	Chulpan_(rye)	S._cereale_Chulpan	Phosphorite	2021-03-11 15:34:19	317.61	0.16289	0	0	0	1	0	0	63.707	0	85.9476	0	0.42259	0.57741	0	0	0	16.231	4.985	0	1.36	3.57729	5.062	0.35602	0	0	0	1	0	0	0.16287	0	0	0	1	0	0	0.13402	0	0	0	1	0	0
2	06:04:02	Chulpan_(rye)	S._cereale_Chulpan	Phosphorite	2021-03-11 15:34:19	0	0	0	0	0	0	0	0	0	0	0	0	0	0	0	0	0	0	0	0	0	0	0	0	0	0	0	0	0	0	0	0	0	0	0	0	0	0	0	0	0	0	0	0
2	06:04:03	Chulpan_(rye)	S._cereale_Chulpan	Phosphorite	2021-03-11 15:34:19	1580.62	0.047	0	0	0.30747	0.69253	0	0	48.207	0	57.3074	0	0.71413	0.28587	0	0	0	10.86	32.788	0.001	4.186	5.30652	12.547	0.25141	0	0	0.01801	0.92945	0.05254	0	0.15487	0	0	0.07476	0.92524	0	0	0.19303	0	0	0.07476	0.85933	0.06591	0
2	06:05:01	LD222_Rht17_NIL	T._durum_LD222_Rht17_NIL	Phosphorite	2021-03-11 15:34:19	7509.95	0.15083	0	0	0.22452	0.77548	0	0	105.698	109.481	101.984	0.00859	0.33128	0.60407	0.02357	0.03248	0	12.013	71.051	0.002	12.688	4.80385	63.677	0.4674	0	0	0.06002	0.31605	0.62393	0	0.06001	0	0	0.52203	0.45166	0.02631	0	0.10785	0	0	0.52203	0.38528	0.09268	0
2	06:05:02	LD222_Rht17_NIL	T._durum_LD222_Rht17_NIL	Phosphorite	2021-03-11 15:34:19	3730.28	0.04652	0	0	0.39316	0.60684	0	0	105.049	0	90.7991	0	0.43783	0.28109	0.2146	0.06648	0	10.376	35.51	0.001	5.463	5.55085	51.802	0.2628	0	0	0.12749	0.77989	0.09262	0	0.09552	0	0	0.42535	0.52193	0.05272	0	0.14451	0	0	0.42535	0.38468	0.18997	0
2	06:05:03	LD222_Rht17_NIL	T._durum_LD222_Rht17_NIL	Phosphorite	2021-03-11 15:34:19	8917.82	0.14622	0	0	0.05982	0.94018	0	0	103.811	65.44	94.9712	0	0.44482	0.5136	0.02551	0.01606	0	13.316	85.904	0.002	18.356	4.34093	57.657	0.34627	0	0	0	0.72149	0.27851	0	0.06713	0	0	0.30407	0.69593	0	0	0.08227	0	0	0.30407	0.69593	0	0
2	06:06:01	LD222_(tall_wheat)	LD222_recurrent_parent_(tall)	Phosphorite	2021-03-11 15:34:19	10841.2	0.22816	0	0	0.01465	0.98535	0	0	121.982	125.809	116.807	0	0.0919	0.90044	0.00766	0	0	14.727	88.875	0.003	19.635	3.93303	23.898	0.53739	0	0	0	0.25633	0.74367	0	0.02114	0	0	0.4399	0.55341	0.00669	0	0.01153	0	0	0.4399	0.55341	0.00669	0
2	06:06:02	LD222_(tall_wheat)	LD222_recurrent_parent_(tall)	Phosphorite	2021-03-11 15:34:19	17868.5	0.16404	0	0	0.04862	0.95138	0	0	131.765	136.334	127.722	0	0.19535	0.74371	0.0458	0.01515	0	20.31	135.609	0.004	49.397	2.8808	72.281	0.49505	0	0	0	0.46791	0.53209	0	-0.03827	0	0	0.62367	0.37304	0.00329	0	-0.00731	0	0	0.62367	0.37304	0.00329	0
2	06:06:03	LD222_(tall_wheat)	LD222_recurrent_parent_(tall)	Phosphorite	2021-03-11 15:34:19	16098.2	0.17918	0	0	0.02528	0.97472	0	0	138.063	142.022	133.414	0	0.12404	0.80233	0.05709	0.01655	0	13.285	116.6	0.003	26.276	4.35104	72.12	0.47494	0	0	0	0.47754	0.52246	0	-0.03389	0	0	0.73918	0.26082	0	0	-0.0243	0	0	0.73918	0.26082	0	0
2	06:07:01	Chulpan_(rye)	S._cereale_Chulpan	KH2PO4	2021-03-11 15:34:19	0	0	0	0	0	0	0	0	0	0	0	0	0	0	0	0	0	0	0	0	0	0	0	0	0	0	0	0	0	0	0	0	0	0	0	0	0	0	0	0	0	0	0	0
2	06:07:02	Chulpan_(rye)	S._cereale_Chulpan	KH2PO4	2021-03-11 15:34:19	819.92	0.1725	0	0	0	1	0	0	71.358	0	108.176	0	0.26137	0.73863	0	0	0	12.098	11.49	0	1.915	4.77049	9.601	0.52411	0	0	0	0.53602	0.46398	0	0.02106	0	0	0.44983	0.55017	0	0	0.01412	0	0	0.44983	0.55017	0	0
2	06:07:03	Chulpan_(rye)	S._cereale_Chulpan	KH2PO4	2021-03-11 15:34:19	7238.45	0.14722	0	0	0.07586	0.92414	0	0	100.9	104.76	141.347	0	0.01497	0.84927	0.12741	0.00836	0	18.504	71.739	0.002	22.654	3.15056	20.576	0.44532	0	0	0	0.65992	0.34008	0	-0.06109	0	0	0.73466	0.26534	0	0	-0.05705	0	0	0.73466	0.26534	0	0
2	06:08:01	LD222_Rht17_NIL	T._durum_LD222_Rht17_NIL	KH2PO4	2021-03-11 15:34:19	8250.93	0.21262	0	0	0.03302	0.96229	0.00469	0	93.383	96.76	124.154	0.00492	0.18108	0.74434	0.06966	0	0	17.76	88.356	0.003	25.107	3.27801	39.154	0.55876	0	0	0	0.26171	0.73829	0	-0.00827	0	0	0.61114	0.38886	0	0	0.00563	0	0	0.61114	0.38886	0	0
2	06:08:02	LD222_Rht17_NIL	T._durum_LD222_Rht17_NIL	KH2PO4	2021-03-11 15:34:19	4602.17	0.07637	0	0	0.24704	0.75296	0	0	95.781	0	102.021	0.01742	0.40057	0.3826	0.12561	0.0738	0	11.487	48.049	0.001	6.627	5.02042	51.054	0.34021	0	0	0.04181	0.72301	0.23519	0	0.00826	0	0	0.50821	0.49179	0	0	0.0493	0	0	0.50821	0.42051	0.07128	0
2	06:08:03	LD222_Rht17_NIL	T._durum_LD222_Rht17_NIL	KH2PO4	2021-03-11 15:34:19	551.073	0.1085	0	0	0	1	0	0	65.93	0	156.793	0	0	0.8598	0.1402	0	0	7.137	8.358	0	0.76	8.04588	4.413	0.42372	0	0	0	1	0	0	-0.0946	0	0	0.90494	0.09506	0	0	-0.08406	0	0	0.90494	0.09506	0	0
2	06:09:01	LD222_(tall_wheat)	LD222_recurrent_parent_(tall)	KH2PO4	2021-03-11 15:34:19	8598.59	0.11627	0	0	0.18006	0.81994	0	0	105.466	110.735	155.34	0.00439	0.08908	0.58442	0.28485	0.03726	0	27.639	81.529	0.002	37.701	2.15554	21.753	0.52545	0	0	0	0.38193	0.61807	0	-0.12634	0	0.01826	0.72313	0.25861	0	0	-0.09133	0	0	0.74139	0.25861	0	0
2	06:09:02	LD222_(tall_wheat)	LD222_recurrent_parent_(tall)	KH2PO4	2021-03-11 15:34:19	11480.8	0.10377	0	0	0.11636	0.88364	0	0	120.386	124.923	145.215	0	0.15614	0.67829	0.14144	0.02413	0	14.695	95.366	0.003	22.98	3.94155	61.152	0.44646	0	0	0	0.68186	0.31814	0	-0.07237	0	0	0.77071	0.22929	0	0	-0.05479	0	0.00902	0.76169	0.22929	0	0
2	06:09:03	LD222_(tall_wheat)	LD222_recurrent_parent_(tall)	KH2PO4	2021-03-11 15:34:19	17353.5	0.12128	0	0	0.18909	0.81091	0	0	128.705	115.893	115.551	0	0.29088	0.56147	0.11355	0.0341	0	14.969	134.832	0.004	33.127	3.87096	48.155	0.39017	0	0	0.00716	0.62165	0.37119	0	-0.01733	0	0.00369	0.49456	0.50176	0	0	0.00506	0	0.0093	0.48894	0.49193	0.00983	0
1	05:01:01	Chulpan_(rye)	S._cereale_Chulpan	w/o_P	2021-03-15 14:29:12	29250.9	0.20959	0	0	0.09133	0.87766	0.03102	0	145.173	156.815	121.035	0	0.11895	0.7681	0.09799	0.01495	0	15.688	201.49	0.006	48.134	3.69764	63.333	0.5126	0	0	0.0109	0.31984	0.66926	0	0.02976	0	0	0.49857	0.49229	0.00914	0	0.00429	0	0	0.49857	0.49053	0.0109	0
1	05:01:02	Chulpan_(rye)	S._cereale_Chulpan	w/o_P	2021-03-15 14:29:12	0	0	0	0	0	0	0	0	0	0	0	0	0	0	0	0	0	0	0	0	0	0	0	0	0	0	0	0	0	0	0	0	0	0	0	0	0	0	0	0	0	0	0	0
1	05:01:03	Chulpan_(rye)	S._cereale_Chulpan	w/o_P	2021-03-15 14:29:12	2212.19	0.08248	0	0	0	1	0	0	108.346	0	145.244	0	0.17251	0.49556	0.33193	0	0	9.138	20.418	0.001	2.112	6.29522	38.387	0.3088	0	0	0.01297	0.98703	0	0	-0.05305	0	0	0.66775	0.33225	0	0	-0.07025	0	0	0.66775	0.33225	0	0
1	05:02:01	LD222_Rht17_NIL	T._durum_LD222_Rht17_NIL	w/o_P	2021-03-15 14:29:12	24530.2	0.21593	0	0	0.06605	0.9118	0.02214	0	116.149	113.182	106.85	0	0.22466	0.7409	0.00856	0.02588	0	17.594	211.196	0.006	66.032	3.308	46.024	0.53369	0	0	0.01148	0.31234	0.67618	0	0.05095	0	0	0.39427	0.6042	0.00153	0	0.04885	0	0	0.39427	0.59974	0.00599	0
1	05:02:02	LD222_Rht17_NIL	T._durum_LD222_Rht17_NIL	w/o_P	2021-03-15 14:29:12	17941.4	-0.00014	0	0	0.43367	0.56633	0	0	128.409	116.47	190.114	0	0.14595	0.27275	0.41199	0.16931	0	15.805	139.721	0.004	36.392	3.67103	74.625	0.39336	0	0	0	0.69581	0.30419	0	-0.08127	0	0.00264	0.67169	0.32567	0	0	-0.04912	0	0	0.67433	0.32567	0	0
1	05:02:03	LD222_Rht17_NIL	T._durum_LD222_Rht17_NIL	w/o_P	2021-03-15 14:29:12	8049.84	0.02539	0	0	0.2625	0.7375	0	0	147.135	0	71.5476	0	0.55738	0.10595	0.27217	0.06451	0	13.657	54.711	0.002	13.49	4.23476	66.608	0.18734	0	0	0.06888	0.93112	0	0	0.03749	0	0	0.36708	0.63292	0	0	0.03567	0	0	0.36708	0.63292	0	0
1	05:03:01	LD222_(tall_wheat)	LD222_recurrent_parent_(tall)	w/o_P	2021-03-15 14:29:12	44149.1	0.06991	0	0	0.25568	0.74432	0	0	171.12	173.35	162.078	0	0.10208	0.54765	0.26629	0.08398	0	21.471	258	0.008	89.308	2.73176	90.501	0.42946	0	0	0.01183	0.6345	0.35367	0	-0.10882	0	0.00753	0.74208	0.25039	0	0	-0.09895	0.00628	0.03326	0.71007	0.25039	0	0
1	05:03:02	LD222_(tall_wheat)	LD222_recurrent_parent_(tall)	w/o_P	2021-03-15 14:29:12	33790.2	0.14442	0	0	0.09692	0.90308	0	0	165.009	168.592	151.583	0.00298	0.08029	0.74722	0.1338	0.03571	0	18.583	204.777	0.006	64.485	3.1376	83.425	0.54352	0	0	0.00603	0.26602	0.72795	0	-0.12461	0	0.00222	0.80177	0.19601	0	0	-0.072	0	0	0.80399	0.19601	0	0
1	05:03:03	LD222_(tall_wheat)	LD222_recurrent_parent_(tall)	w/o_P	2021-03-15 14:29:12	8685.9	0.07561	0	0	0.16754	0.83246	0	0	179.488	183.099	182.664	0	0.01917	0.49954	0.44721	0.03408	0	9.924	48.393	0.001	4.578	5.80107	19.302	0.41566	0	0	0	0.70257	0.29743	0	-0.1976	0	0	0.9597	0.0403	0	0	-0.20007	0	0	0.9597	0.0403	0	0
1	05:04:01	Chulpan_(rye)	S._cereale_Chulpan	Phosphorite	2021-03-15 14:29:12	2885.38	0.06664	0	0	0.08446	0.91554	0	0	89.859	0	78.0537	0	0.57344	0.29591	0.09311	0.03754	0	10.235	32.11	0.001	5.242	5.62647	27.872	0.30199	0	0	0	0.98305	0.01695	0	0.10296	0	0	0.23526	0.76474	0	0	0.11749	0	0	0.23526	0.76474	0	0
1	05:04:02	Chulpan_(rye)	S._cereale_Chulpan	Phosphorite	2021-03-15 14:29:12	555.192	0.11953	0	0	0.27395	0.72605	0	0	114.93	0	89.8965	0	0.45104	0.54896	0	0	0	19.824	4.831	0	2.415	2.94838	35.049	0.31716	0	0	0.09614	0.90386	0	0	0.03483	0	0	0.54896	0.45104	0	0	0.075	0	0	0.54896	0.45104	0	0
1	05:04:03	Chulpan_(rye)	S._cereale_Chulpan	Phosphorite	2021-03-15 14:29:12	6649.12	0.04333	0	0	0.4202	0.5798	0	0	108.374	110.254	155.034	0.00422	0.17626	0.34613	0.24427	0.22912	0	16.275	61.353	0.002	13.569	3.56784	16.407	0.29264	0	0	0.07782	0.75205	0.17013	0	-0.00119	0	0	0.54413	0.43371	0.02215	0	0.01167	0	0	0.54413	0.45587	0	0
1	05:05:01	LD222_Rht17_NIL	T._durum_LD222_Rht17_NIL	Phosphorite	2021-03-15 14:29:12	10639.6	0.08541	0	0	0.47459	0.50031	0.02509	0	109.597	52.685	186.677	0	0.02403	0.44326	0.45277	0.07994	0	31.696	97.08	0.003	46.866	1.90318	62.396	0.42343	0	0	0.05681	0.46094	0.48225	0	-0.12931	0	0	0.81421	0.18579	0	0	-0.14549	0	0.03074	0.78347	0.18579	0	0
1	05:05:02	LD222_Rht17_NIL	T._durum_LD222_Rht17_NIL	Phosphorite	2021-03-15 14:29:12	161.262	-0.00079	0	0	0.38581	0.61419	0	0	88.545	0	95.5732	0	0	0.61419	0	0.38581	0	15.859	1.821	0	0.607	3.65889	6.3	0.48223	0	0	0	0.61419	0.38581	0	0.01422	0	0	0.321	0.679	0	0	0.00173	0	0	0.321	0.679	0	0
1	05:05:03	LD222_Rht17_NIL	T._durum_LD222_Rht17_NIL	Phosphorite	2021-03-15 14:29:12	672.001	0.0037	0	0	0.32326	0.67674	0	0	125.953	0	30.5209	0	1	0	0	0	0	13.925	5.335	0	0.762	4.15471	10	0.01671	0	0	0.29629	0.70371	0	0	0.40636	0	0	0	1	0	0	0.55798	0	0	0	0.33017	0.66983	0
1	05:06:01	LD222_(tall_wheat)	LD222_recurrent_parent_(tall)	Phosphorite	2021-03-15 14:29:12	61206.6	0.1525	0	0	0.16039	0.83663	0.00298	0	117.601	142.992	127.322	0.00066	0.11345	0.69634	0.17202	0.01752	0	30.061	520.461	0.015	209.118	1.99623	71.563	0.44926	0	0	0.03133	0.53701	0.43165	0	-0.00503	0	0	0.4989	0.49792	0.00318	0	-0.02562	0	0	0.4989	0.49686	0.00217	0.00206
1	05:06:02	LD222_(tall_wheat)	LD222_recurrent_parent_(tall)	Phosphorite	2021-03-15 14:29:12	556.743	0.27092	0	0	0	1	0	0	191.928	0	122.521	0	0	1	0	0	0	5.858	2.901	0	0.725	9.79302	130.505	0.50346	0	0	0	0.34234	0.65766	0	-0.00261	0	0	0.34234	0.65766	0	0	-0.0114	0	0	0.34234	0.65766	0	0
1	05:06:03	LD222_(tall_wheat)	LD222_recurrent_parent_(tall)	Phosphorite	2021-03-15 14:29:12	812.812	-0.00316	0	0	0.53444	0.46556	0	0	94.054	0	36.0201	0	0.85479	0.14521	0	0	0	11.206	8.642	0	0.864	5.14442	8.305	0.08072	0	0	0.18569	0.81431	0	0	0.14665	0	0	0.0676	0.9324	0	0	0.23087	0	0	0.0676	0.9324	0	0
1	05:07:01	Chulpan_(rye)	S._cereale_Chulpan	KH2PO4	2021-03-15 14:29:12	43.243	0.15113	0	0	0	1	0	0	19.975	0	98.836	0	0	1	0	0	0	6.489	2.165	0	0.722	8.84589	3.2	0.35192	0	0	0	1	0	0	0.07569	0	0	0	1	0	0	0.06686	0	0	0	1	0	0
1	05:07:02	Chulpan_(rye)	S._cereale_Chulpan	KH2PO4	2021-03-15 14:29:12	27442.4	0.1341	0	0	0.15935	0.84065	0	0	102.028	106.007	110.092	0	0.27569	0.596	0.10296	0.02536	0	29.505	268.969	0.008	137.219	2.03035	19.305	0.36415	0	0	0.03008	0.69117	0.27876	0	0.05545	0	0	0.46738	0.52699	0.00563	0	0.05845	0	0	0.46738	0.48292	0.0497	0
1	05:07:03	Chulpan_(rye)	S._cereale_Chulpan	KH2PO4	2021-03-15 14:29:12	24370.8	0.15601	0	0	0.13079	0.86327	0.00594	0	95.997	106.416	85.9145	0	0.45112	0.47922	0.01556	0.05411	0	28.627	253.872	0.007	120.563	2.08713	30.254	0.377	0	0	0.07516	0.52312	0.40171	0	0.11558	0	0	0.2474	0.73204	0.02056	0	0.09614	0	0	0.2474	0.7526	0	0
1	05:08:01	LD222_Rht17_NIL	T._durum_LD222_Rht17_NIL	KH2PO4	2021-03-15 14:29:12	13128.4	0.05205	0	0	0.31652	0.68348	0	0	154.537	111.843	155.307	0.01536	0.15881	0.42563	0.31201	0.0882	0	20.567	84.953	0.002	28.126	2.84625	97.317	0.40199	0	0	0.00994	0.693	0.29706	0	-0.06306	0	0.00628	0.63163	0.36209	0	0	-0.02877	0	0	0.63791	0.36209	0	0
1	05:08:02	LD222_Rht17_NIL	T._durum_LD222_Rht17_NIL	KH2PO4	2021-03-15 14:29:12	10072.8	0.0307	0	0	0.43002	0.56998	0	0	158.239	84.727	182.109	0	0.18011	0.25947	0.49959	0.06083	0	13.438	63.656	0.002	15.251	4.30237	95.166	0.39822	0	0	0.03182	0.76502	0.20316	0	-0.11119	0	0	0.73814	0.25083	0.01103	0	-0.09883	0	0.03397	0.70417	0.23003	0.03182	0
1	05:08:03	LD222_Rht17_NIL	T._durum_LD222_Rht17_NIL	KH2PO4	2021-03-15 14:29:12	19179.3	0.09583	0	0	0.17082	0.82918	0	0	131.223	96.215	98.0263	0.00405	0.43124	0.37733	0.16074	0.02664	0	12.542	146.158	0.004	28.582	4.60401	68.351	0.3443	0	0	0.05967	0.64747	0.29286	0	0.07756	0	0	0.44394	0.54712	0.00894	0	0.11509	0	0	0.44394	0.413	0.14307	0
1	05:09:01	LD222_(tall_wheat)	LD222_recurrent_parent_(tall)	KH2PO4	2021-03-15 14:29:12	79179.2	0.19568	0	0	0.05744	0.93397	0.00859	0	164.188	190.91	113.502	0	0.20981	0.73747	0.03481	0.01791	0	37.655	482.249	0.014	261.034	1.63687	101.523	0.51377	0	0	0	0.42743	0.57257	0	0.03651	0	0.00298	0.44524	0.54531	0.00647	0	0.0268	0	0	0.44822	0.54711	0.00467	0
1	05:09:02	LD222_(tall_wheat)	LD222_recurrent_parent_(tall)	KH2PO4	2021-03-15 14:29:12	133263	0.17024	0	0	0.06355	0.9343	0.00215	0	191.593	221.2	134.166	0.00342	0.1358	0.7721	0.07544	0.01325	0	29.761	695.55	0.02	343.6	2.01448	108.34	0.51838	0	0	0	0.42938	0.57062	0	-0.07123	0	0.0004	0.70469	0.29491	0	0	-0.04182	0	0	0.70509	0.29272	0.00219	0
1	05:09:03	LD222_(tall_wheat)	LD222_recurrent_parent_(tall)	KH2PO4	2021-03-15 14:29:12	31312	0.15634	0	0	0.09759	0.89652	0.00589	0	157.919	160.628	147.605	0	0.03369	0.72948	0.22896	0.00788	0	27.315	198.279	0.006	90.378	2.17906	80.038	0.35945	0	0	0.03259	0.65423	0.31318	0	-0.06696	0	0	0.77438	0.22562	0	0	-0.0904	0	0.00822	0.76616	0.22562	0	0
2	05:01:01	Chulpan_(rye)	S._cereale_Chulpan	w/o_P	2021-03-15 14:34:27	32973	0.0998	0	0	0.2482	0.7518	0	0	143.999	150.787	134.069	0	0.22431	0.49039	0.25104	0.03427	0	13.527	228.981	0.007	43.025	4.27446	90.115	0.36353	0	0	0.01823	0.74249	0.23928	0	-0.02377	0	0.00242	0.59226	0.40532	0	0	-0.03197	0	0.02764	0.56704	0.39026	0.01506	0
2	05:01:02	Chulpan_(rye)	S._cereale_Chulpan	w/o_P	2021-03-15 14:34:27	1411.04	0.08785	0	0	0.10513	0.89487	0	0	105.341	0	82.5215	0	0.58662	0.30825	0.10513	0	0	16.12	13.395	0	4.688	3.60109	36.942	0.40895	0	0	0	0.87587	0.12413	0	0.09279	0	0	0.23694	0.76306	0	0	0.05898	0	0	0.23694	0.76306	0	0
2	05:01:03	Chulpan_(rye)	S._cereale_Chulpan	w/o_P	2021-03-15 14:34:27	6926.89	0.11857	0	0	0.04793	0.95207	0	0	91.005	87.604	124.689	0	0.28086	0.60577	0.09649	0.01687	0	8.032	76.116	0.002	10.527	7.15464	41.734	0.30324	0	0	0	0.98592	0.01408	0	0.00331	0	0	0.55802	0.44198	0	0	-0.00246	0	0	0.55802	0.42004	0.02194	0
2	05:02:01	LD222_Rht17_NIL	T._durum_LD222_Rht17_NIL	w/o_P	2021-03-15 14:34:27	24314.5	0.06035	0.0028	0.0089	0.27375	0.71454	0	0	123.56	101.085	168.156	0	0.13529	0.40756	0.37115	0.086	0	16.745	196.783	0.006	56.43	3.47046	60.123	0.44378	0	0	0	0.55587	0.44413	0	-0.11028	0	0.04446	0.70227	0.25327	0	0	-0.10408	0	0.04471	0.70203	0.2502	0.00306	0
2	05:02:02	LD222_Rht17_NIL	T._durum_LD222_Rht17_NIL	w/o_P	2021-03-15 14:34:27	14701.1	0.06573	0	0	0.26996	0.73004	0	0	144.92	117.129	176.114	0	0.13724	0.44295	0.39799	0.02182	0	13.477	101.442	0.003	21.16	4.29022	49.176	0.40078	0	0	0.02911	0.66744	0.30345	0	-0.13513	0	0.00721	0.82066	0.17214	0	0	-0.12213	0	0.00696	0.82091	0.14822	0.02392	0
2	05:02:03	LD222_Rht17_NIL	T._durum_LD222_Rht17_NIL	w/o_P	2021-03-15 14:34:27	16608.7	0.15414	0	0.0049	0.06468	0.93043	0	0	141.276	140.345	149.807	0	0.10444	0.69005	0.19626	0.00926	0	15.633	117.562	0.003	32.961	3.71038	50.804	0.5056	0	0	0.00461	0.41017	0.58522	0	-0.13458	0	0.01761	0.73649	0.2459	0	0	-0.09332	0	0	0.7541	0.2459	0	0
2	05:03:01	LD222_(tall_wheat)	LD222_recurrent_parent_(tall)	w/o_P	2021-03-15 14:34:27	2376.3	0.01895	0	0	0.28804	0.71196	0	0	173.212	0	199.789	0	0	0.2361	0.7639	0	0	19.903	13.719	0	4.749	2.93724	39.62	0.4398	0	0	0	0.64358	0.35642	0	-0.2018	0	0.09612	0.8412	0.06267	0	0	-0.19364	0	0.05372	0.88361	0.06267	0	0
2	05:03:02	LD222_(tall_wheat)	LD222_recurrent_parent_(tall)	w/o_P	2021-03-15 14:34:27	9342.94	0.07525	0	0	0.22884	0.77116	0	0	185.989	0	180.089	0	0.03452	0.42272	0.46904	0.07372	0	11.434	50.234	0.001	10.366	5.04342	50.981	0.37189	0	0	0.0183	0.71459	0.26711	0	-0.1749	0	0	0.86916	0.13084	0	0	-0.21204	0	0.1459	0.72326	0.13084	0	0
2	05:03:03	LD222_(tall_wheat)	LD222_recurrent_parent_(tall)	w/o_P	2021-03-15 14:34:27	22414.6	0.17754	0	0	0.03815	0.96185	0	0	166.686	176.625	144.526	0	0.0207	0.84671	0.13259	0	0	12.074	134.472	0.004	24.24	4.77996	60.382	0.38904	0	0	0.00796	0.67827	0.31377	0	-0.08427	0	0	0.83705	0.16295	0	0	-0.09839	0	0.01612	0.82094	0.16295	0	0
2	05:04:01	Chulpan_(rye)	S._cereale_Chulpan	Phosphorite	2021-03-15 14:34:27	59.166	0.09984	0	0	0	1	0	0	42.733	0	125.625	0	0	1	0	0	0	3.285	1.385	0	0	17.4357	0	0.38876	0	0	0	1	0	0	-0.01091	0	0	1	0	0	0	-0.00971	0	0	1	0	0	0
2	05:04:02	Chulpan_(rye)	S._cereale_Chulpan	Phosphorite	2021-03-15 14:34:27	3468.38	-0.04046	0	0	0.71796	0.28204	0	0	101.053	0	238.053	0	0.08772	0.01918	0.72471	0.1684	0	7.671	34.323	0.001	6.643	7.48936	53.916	0.1623	0	0	0.04347	0.95653	0	0	-0.11151	0	0	0.79058	0.20942	0	0	-0.21298	0	0.11228	0.6783	0.20942	0	0
2	05:04:03	Chulpan_(rye)	S._cereale_Chulpan	Phosphorite	2021-03-15 14:34:27	25312.5	0.07133	0	0.00784	0.20082	0.79134	0	0	161.576	136.561	151.851	0	0.17263	0.55654	0.19943	0.07141	0	13.725	156.66	0.005	35.23	4.21413	93.886	0.25882	0.0047	0	0.03361	0.91996	0.04174	0	-0.08085	0	0.00264	0.70277	0.29458	0	0	-0.09806	0	0.01709	0.68832	0.29458	0	0
2	05:05:01	LD222_Rht17_NIL	T._durum_LD222_Rht17_NIL	Phosphorite	2021-03-15 14:34:27	595.572	-0.00913	0	0	0.19569	0.80431	0	0	111.736	0	171.426	0	0.27503	0.25654	0.27274	0.19569	0	9.524	5.33	0	0.666	6.04229	7.657	0.31561	0	0	0	1	0	0	0.02001	0	0	0.63486	0.36514	0	0	0.01712	0	0	0.63486	0.36514	0	0
2	05:05:02	LD222_Rht17_NIL	T._durum_LD222_Rht17_NIL	Phosphorite	2021-03-15 14:34:27	4718.17	-0.03351	0	0	0.57267	0.42733	0	0	117.331	0	286.785	0	0.27398	0.16144	0.31029	0.25429	0	8.762	40.212	0.001	8.042	6.56263	33.558	0.23667	0	0	0.03693	0.96307	0	0	-0.00808	0	0	0.52285	0.47715	0	0	-0.00766	0	0	0.52285	0.47715	0	0
2	05:05:03	LD222_Rht17_NIL	T._durum_LD222_Rht17_NIL	Phosphorite	2021-03-15 14:34:27	20397	0.12531	0	0	0.14239	0.85429	0.00332	0	143.352	112.046	152.591	0	0.12167	0.59902	0.22836	0.05095	0	12.497	142.286	0.004	27.336	4.62036	72.969	0.45803	0	0	0.01307	0.53058	0.45634	0	-0.12156	0	0.00945	0.73924	0.24791	0.0034	0	-0.09527	0.00363	0.00387	0.74119	0.24177	0.00954	0
2	05:06:01	LD222_(tall_wheat)	LD222_recurrent_parent_(tall)	Phosphorite	2021-03-15 14:34:27	28542.6	0.17204	0	0	0.10173	0.88912	0.00915	0	59.25	97.607	125.772	0.001	0.17185	0.67832	0.13174	0.01709	0	34.229	481.729	0.014	200.609	1.77772	16.724	0.47881	0	0	0	0.49179	0.50821	0	-0.01357	0.00056	0.0021	0.56667	0.42703	0.00366	0	-0.01651	0	0.00077	0.56855	0.42453	0.00616	0
2	05:06:02	LD222_(tall_wheat)	LD222_recurrent_parent_(tall)	Phosphorite	2021-03-15 14:34:27	20146.4	0.0544	0	0	0.29124	0.70876	0	0	162.998	123.944	138.781	0.0075	0.26823	0.3623	0.27162	0.09034	0	12.454	123.599	0.004	25.624	4.63601	97.055	0.35623	0	0	0	0.91901	0.08099	0	-0.0028	0	0	0.58487	0.41513	0	0	-0.01299	0	0	0.58487	0.39203	0.0231	0
2	05:06:03	LD222_(tall_wheat)	LD222_recurrent_parent_(tall)	Phosphorite	2021-03-15 14:34:27	3934.99	0.20831	0	0	0.00992	0.99009	0	0	120.994	0	129.533	0	0.00755	0.96926	0.02319	0	0	16.173	32.522	0.001	7.997	3.5898	40.672	0.40339	0	0	0	0.7248	0.2752	0	-0.0412	0	0	0.64344	0.35656	0	0	-0.03096	0	0	0.64344	0.35656	0	0
2	05:07:01	Chulpan_(rye)	S._cereale_Chulpan	KH2PO4	2021-03-15 14:34:27	6349.52	0.20435	0	0	0.04177	0.95823	0	0	90.842	73.008	103.672	0	0.29196	0.66466	0.02908	0.01429	0	15.826	69.897	0.002	18.818	3.66633	36.616	0.48645	0	0	0	0.45605	0.54395	0	0.0866	0	0	0.34334	0.65666	0	0	0.05477	0	0	0.34334	0.65666	0	0
2	05:07:02	Chulpan_(rye)	S._cereale_Chulpan	KH2PO4	2021-03-15 14:34:27	19358	0.09822	0	0	0.11541	0.88459	0	0	123.402	98.758	135.824	0	0.28888	0.51327	0.17713	0.02073	0	15.536	156.869	0.005	42.162	3.73305	79.755	0.36535	0	0	0.01941	0.81909	0.1615	0	-0.01122	0	0	0.67771	0.32229	0	0	0.00192	0	0	0.67771	0.28456	0.03772	0
2	05:07:03	Chulpan_(rye)	S._cereale_Chulpan	KH2PO4	2021-03-15 14:34:27	43974.8	0.17734	0	0.00183	0.10074	0.88167	0.01576	0	97.006	106.409	118.771	0.00121	0.20873	0.68623	0.08781	0.01602	0	25.254	453.319	0.013	187.357	2.34375	60.779	0.44877	0	0	0.02999	0.47534	0.49467	0	0.03467	0	0	0.50095	0.48584	0.01322	0	0.00543	0	0.0024	0.49854	0.4936	0.004	0.00145
2	05:08:01	LD222_Rht17_NIL	T._durum_LD222_Rht17_NIL	KH2PO4	2021-03-15 14:34:27	14125.3	0.11933	0	0	0.21031	0.78969	0	0	85.894	87.766	153.332	0	0.07317	0.60444	0.3224	0	0	38.804	164.45	0.005	84.552	1.59572	4.156	0.45294	0	0	0.00674	0.57274	0.42052	0	-0.08402	0	0	0.76497	0.23503	0	0	-0.0975	0	0	0.76497	0.23503	0	0
2	05:08:02	LD222_Rht17_NIL	T._durum_LD222_Rht17_NIL	KH2PO4	2021-03-15 14:34:27	11961.7	0.05983	0	0	0.28544	0.71456	0	0	176.306	0	171.777	0	0.05838	0.58917	0.28815	0.0643	0	10.23	67.846	0.002	12.336	5.62955	92.035	0.34755	0	0	0	0.91358	0.08642	0	-0.10632	0	0	0.8406	0.1594	0	0	-0.13	0	0.05681	0.78379	0.1594	0	0
2	05:08:03	LD222_Rht17_NIL	T._durum_LD222_Rht17_NIL	KH2PO4	2021-03-15 14:34:27	28479.8	0.14294	0	0.00277	0.0763	0.92092	0	0	129.71	136.865	139.157	0	0.04085	0.81745	0.13253	0.00917	0	27.548	219.565	0.006	100.529	2.16206	38.114	0.37962	0	0	0.02618	0.70581	0.26801	0	-0.06541	0	0.01752	0.67282	0.30966	0	0	-0.06261	0	0.00621	0.68413	0.30966	0	0
2	05:09:01	LD222_(tall_wheat)	LD222_recurrent_parent_(tall)	KH2PO4	2021-03-15 14:34:27	77948.4	0.17577	0	0	0.19851	0.79555	0.00595	0	175.546	186.189	144.241	0	0.03675	0.69968	0.25994	0.00363	0	33.766	444.034	0.013	205.455	1.79913	108.43	0.54056	0	0	0.00533	0.279	0.71568	0	-0.08706	0	0.01023	0.63424	0.35553	0	0	-0.10402	0	0.05615	0.58832	0.35553	0	0
2	05:09:02	LD222_(tall_wheat)	LD222_recurrent_parent_(tall)	KH2PO4	2021-03-15 14:34:27	67087.7	0.2125	0	0	0.02323	0.97585	0.00091	0	210.518	221.774	141.794	0	0.04134	0.90511	0.05241	0.00115	0	26.28	318.679	0.009	142.729	2.25842	87.325	0.58273	0	0	0.00621	0.19705	0.79675	0	-0.12488	0	0	0.8403	0.1597	0	0	-0.06707	0	0	0.8403	0.15349	0.00621	0
2	05:09:03	LD222_(tall_wheat)	LD222_recurrent_parent_(tall)	KH2PO4	2021-03-15 14:34:27	32348.6	0.20292	0	0	0.0363	0.96194	0.00176	0	148.416	152.278	119.713	0	0.20974	0.75645	0.02916	0.00466	0	35.773	217.959	0.006	129.129	1.71059	65.008	0.48204	0	0	0.02985	0.36586	0.60429	0	-0.01298	0	0	0.59405	0.40595	0	0	0.02123	0	0	0.59405	0.38452	0.02143	0
1	06:01:01	Chulpan_(rye)	S._cereale_Chulpan	w/o_P	2021-03-15 14:59:12	125.568	0.05979	0	0	0	1	0	0	89.307	0	92.7273	0	0	1	0	0	0	5.094	1.406	0	0	11.2564	0	0.21361	0	0	0	1	0	0	0.03741	0	0	0	1	0	0	0.04673	0	0	0	1	0	0
1	06:01:02	Chulpan_(rye)	S._cereale_Chulpan	w/o_P	2021-03-15 14:59:12	3792.47	-0.02052	0	0	0.48451	0.51549	0	0	132.19	0	217.377	0	0.06837	0.32844	0.37612	0.22707	0	10.232	28.69	0.001	6.375	5.62852	54.622	0.19813	0	0	0.07991	0.89771	0.02238	0	-0.09365	0	0	0.74138	0.25862	0	0	-0.12137	0	0	0.74138	0.25862	0	0
1	06:01:03	Chulpan_(rye)	S._cereale_Chulpan	w/o_P	2021-03-15 14:59:12	2447.27	0.10217	0	0	0.13792	0.86208	0	0	79.158	0	55.4058	0	0.84934	0.15066	0	0	0	19.254	30.916	0.001	9.209	3.03225	21.417	0.19684	0	0	0.10265	0.89735	0	0	0.3302	0	0	0	0.87533	0.12467	0	0.34207	0	0	0	0.69143	0.30857	0
1	06:02:01	LD222_Rht17_NIL	T._durum_LD222_Rht17_NIL	w/o_P	2021-03-15 14:59:12	593.457	0.01165	0	0	0.66571	0.33429	0	0	91.747	0	7.20218	0	0.36825	0.24989	0.0844	0.29745	0	18.076	6.468	0	1.941	3.22263	6.269	0.22904	0	0	0	1	0	0	0.01541	0	0	0.42845	0.57155	0	0	0.03463	0	0	0.42845	0.57155	0	0
1	06:02:02	LD222_Rht17_NIL	T._durum_LD222_Rht17_NIL	w/o_P	2021-03-15 14:59:12	3904.98	0.01528	0	0	0.43653	0.56347	0	0	109.901	0	208.37	0	0.01975	0.1499	0.75014	0.08021	0	8.837	35.532	0.001	4.877	6.50801	12.022	0.37604	0	0	0	0.91201	0.08799	0	-0.17269	0	0.01297	0.96728	0.01975	0	0	-0.18056	0	0.03785	0.9424	0.01975	0	0
1	06:02:03	LD222_Rht17_NIL	T._durum_LD222_Rht17_NIL	w/o_P	2021-03-15 14:59:12	15191.9	0.12003	0	0	0.07353	0.92647	0	0	144.547	130.817	151.746	0	0.06313	0.72231	0.19812	0.01644	0	13.097	105.1	0.003	21.67	4.41235	45.884	0.44534	0	0	0	0.69402	0.30598	0	-0.10024	0	0.00403	0.81842	0.17755	0	0	-0.09071	0	0.00403	0.81842	0.17755	0	0
1	06:03:01	LD222_(tall_wheat)	LD222_recurrent_parent_(tall)	w/o_P	2021-03-15 14:59:12	49789.9	0.13056	0	0	0.21696	0.77795	0.00509	0	152.487	157.862	142.088	0.00182	0.1569	0.56371	0.25938	0.01818	0	26.274	326.519	0.009	125.584	2.25893	64.3	0.45796	0	0	0.00991	0.50068	0.48941	0	-0.07722	0	0.01076	0.62904	0.35936	0.00085	0	-0.07064	0	0.03001	0.60978	0.35596	0.00425	0
1	06:03:02	LD222_(tall_wheat)	LD222_recurrent_parent_(tall)	w/o_P	2021-03-15 14:59:12	5233.74	0.08057	0	0	0.21774	0.78226	0	0	151.224	154.992	174.762	0	0.03041	0.59817	0.32392	0.04751	0	13.172	34.609	0.001	8.354	4.38762	24.238	0.44964	0	0	0	0.66906	0.33094	0	-0.1262	0	0	0.91714	0.08286	0	0	-0.10762	0	0	0.91714	0.08286	0	0
1	06:03:03	LD222_(tall_wheat)	LD222_recurrent_parent_(tall)	w/o_P	2021-03-15 14:59:12	18016	0.22117	0	0	0.04079	0.95327	0.00595	0	181.137	191.308	129.448	0	0.07419	0.89392	0.02944	0.00245	0	15.908	99.461	0.003	23.518	3.64784	55.189	0.48724	0	0	0	0.44155	0.55845	0	-0.05217	0	0	0.79605	0.20395	0	0	-0.03412	0	0	0.79605	0.20395	0	0
1	06:04:01	Chulpan_(rye)	S._cereale_Chulpan	Phosphorite	2021-03-15 14:59:12	11718.2	0.07182	0	0	0.1834	0.8166	0	0	123.125	0	109.727	0	0.41973	0.29753	0.26255	0.02019	0	13.178	95.173	0.003	21.563	4.38565	68.668	0.26564	0	0	0.0561	0.86341	0.08048	0	0.0497	0	0	0.48191	0.51809	0	0	0.04783	0	0	0.48191	0.5043	0.01379	0
1	06:04:02	Chulpan_(rye)	S._cereale_Chulpan	Phosphorite	2021-03-15 14:59:12	9034.46	0.03992	0	0	0.36455	0.63545	0	0	120.533	0	175.942	0	0.09052	0.4201	0.42477	0.0646	0	12.982	74.954	0.002	19.59	4.45073	45.552	0.28526	0	0	0.05592	0.82797	0.11611	0	-0.04551	0	0	0.7404	0.2596	0	0	-0.06724	0	0	0.7404	0.22348	0.03611	0
1	06:04:03	Chulpan_(rye)	S._cereale_Chulpan	Phosphorite	2021-03-15 14:59:12	0	0	0	0	0	0	0	0	0	0	0	0	0	0	0	0	0	0	0	0	0	0	0	0	0	0	0	0	0	0	0	0	0	0	0	0	0	0	0	0	0	0	0	0
1	06:05:01	LD222_Rht17_NIL	T._durum_LD222_Rht17_NIL	Phosphorite	2021-03-15 14:59:12	16394.1	0.16597	0	0	0.13541	0.86459	0	0	112.814	118.685	146.753	0	0.06671	0.67732	0.24089	0.01507	0	14.516	145.319	0.004	35.85	3.98892	30.814	0.5338	0	0	0	0.34268	0.65732	0	-0.08631	0	0	0.74827	0.25173	0	0	-0.08984	0	0.04291	0.70536	0.25173	0	0
1	06:05:02	LD222_Rht17_NIL	T._durum_LD222_Rht17_NIL	Phosphorite	2021-03-15 14:59:12	6776.91	0.05415	0	0	0.27233	0.72767	0	0	145.503	0	180.595	0	0.08728	0.45062	0.43272	0.02938	0	9.694	46.576	0.001	10.35	5.93708	47.311	0.37289	0	0	0	0.87758	0.12242	0	-0.11484	0	0	0.81268	0.18732	0	0	-0.12007	0	0	0.81268	0.18732	0	0
1	06:05:03	LD222_Rht17_NIL	T._durum_LD222_Rht17_NIL	Phosphorite	2021-03-15 14:59:12	20920.3	0.1142	0	0	0.15708	0.84292	0	0	147.843	138.234	147.825	0	0.08823	0.6672	0.20036	0.0442	0	12.539	141.503	0.004	26.313	4.60532	42.835	0.40247	0	0	0.00696	0.71217	0.28087	0	-0.06628	0	0	0.77686	0.22314	0	0	-0.05232	0	0	0.77686	0.22314	0	0
1	06:06:01	LD222_(tall_wheat)	LD222_recurrent_parent_(tall)	Phosphorite	2021-03-15 14:59:12	25880.5	0.00058	0	0	0.4553	0.5447	0	0	180.67	165.194	209.73	0	0.05413	0.21	0.60014	0.13573	0	13.228	143.247	0.004	36.026	4.36946	56.269	0.36506	0	0	0.01062	0.81024	0.17913	0	-0.17198	0	0.02342	0.86669	0.10989	0	0	-0.19122	0	0.05362	0.83649	0.10989	0	0
1	06:06:02	LD222_(tall_wheat)	LD222_recurrent_parent_(tall)	Phosphorite	2021-03-15 14:59:12	68540.2	0.20844	0	0	0.02937	0.9634	0.00723	0	119.125	123.971	118.147	0	0.1731	0.78209	0.04047	0.00435	0	35.66	575.365	0.017	325.563	1.71526	88.172	0.51729	0	0	0	0.42221	0.57779	0	0.01301	0	0.00143	0.51153	0.48507	0.00197	0	0.01095	0	0	0.51296	0.48704	0	0
1	06:06:03	LD222_(tall_wheat)	LD222_recurrent_parent_(tall)	Phosphorite	2021-03-15 14:59:12	30406	0.18322	0.00615	0.00378	0.06094	0.91409	0.01504	0	177.641	144.025	127.854	0.0015	0.21058	0.69285	0.07101	0.02406	0	26.406	171.166	0.005	71.403	2.24843	84.785	0.54736	0	0	0.01063	0.30114	0.68823	0	-0.00128	0	0.01065	0.62983	0.31545	0.04407	0	-0.01352	0	0	0.64048	0.35952	0	0
1	06:07:01	Chulpan_(rye)	S._cereale_Chulpan	KH2PO4	2021-03-15 14:59:12	3200.6	0.13752	0	0	0.19014	0.80986	0	0	77.282	0	73.9462	0	0.54156	0.39654	0.01659	0.04531	0	12.702	41.415	0.001	9.916	4.54705	50.523	0.41148	0	0	0.03693	0.58429	0.37878	0	0.17335	0	0	0.10416	0.89584	0	0	0.1421	0	0	0.10416	0.89584	0	0
1	06:07:02	Chulpan_(rye)	S._cereale_Chulpan	KH2PO4	2021-03-15 14:59:12	23437	0.19695	0	0	0.02767	0.97233	0	0	93.413	98.177	134.565	0	0.04046	0.88695	0.05937	0.01322	0	30.008	250.897	0.007	123.73	1.99942	57.28	0.55175	0	0	0	0.33112	0.66888	0	-0.06389	0	0	0.72447	0.27341	0.00212	0	-0.03574	0	0	0.72447	0.2734	0.00213	0
1	06:07:03	Chulpan_(rye)	S._cereale_Chulpan	KH2PO4	2021-03-15 14:59:12	31249.6	0.16303	0	0.00095	0.13476	0.84919	0.01511	0	81.342	82.987	94.8494	0	0.36295	0.53915	0.07094	0.02696	0	36.294	384.175	0.011	220.483	1.68934	47.701	0.39562	0	0.00135	0.01868	0.62243	0.35754	0	0.11121	0	0	0.24297	0.74557	0.01146	0	0.0824	0	0	0.24297	0.74948	0.00756	0
1	06:08:01	LD222_Rht17_NIL	T._durum_LD222_Rht17_NIL	KH2PO4	2021-03-15 14:59:12	18584.6	0.22312	0	0.00689	0.02236	0.96676	0.00399	0	157.343	163.008	118.24	0	0.13673	0.81597	0.03281	0.01448	0	19.044	118.115	0.003	37.758	3.06442	88.65	0.56659	0	0	0	0.24825	0.75175	0	0.02179	0	0	0.51471	0.47222	0.01307	0	0.0071	0	0	0.51471	0.48529	0	0
1	06:08:02	LD222_Rht17_NIL	T._durum_LD222_Rht17_NIL	KH2PO4	2021-03-15 14:59:12	9393.73	0.09674	0	0	0.11833	0.88167	0	0	175.202	0	169.999	0	0	0.63805	0.31985	0.0421	0	18.187	53.617	0.002	15.866	3.20353	80.866	0.418	0	0	0	0.75458	0.24542	0	-0.1501	0	0	0.92402	0.07598	0	0	-0.13721	0	0	0.92402	0.07598	0	0
1	06:08:03	LD222_Rht17_NIL	T._durum_LD222_Rht17_NIL	KH2PO4	2021-03-15 14:59:12	10553.2	0.0943	0	0	0.16178	0.83822	0	0	166.786	0	146.785	0	0.1036	0.67338	0.16526	0.05776	0	11.564	63.274	0.002	12.08	4.98736	43.899	0.40379	0	0	0	0.78585	0.21415	0	-0.05668	0	0	0.80636	0.19364	0	0	-0.06067	0	0	0.80636	0.19364	0	0
1	06:09:01	LD222_(tall_wheat)	LD222_recurrent_parent_(tall)	KH2PO4	2021-03-15 14:59:12	97024	0.2034	0	0	0.06059	0.93032	0.00908	0	163.283	168.163	106.129	0	0.25476	0.70319	0.0251	0.01695	0	32.921	594.207	0.017	285.485	1.83991	97.345	0.50578	0	0	0.0026	0.40847	0.58894	0	0.0646	0.00085	0.00346	0.34522	0.64252	0.00796	0	0.05119	0	0	0.34952	0.64531	0.00517	0
1	06:09:02	LD222_(tall_wheat)	LD222_recurrent_parent_(tall)	KH2PO4	2021-03-15 14:59:12	45295.7	0.2193	0	0	0.01885	0.97617	0.00498	0	149.606	141.436	134.559	0	0.03985	0.88892	0.06415	0.00707	0	30.041	302.766	0.009	148.952	1.99741	70.964	0.58292	0	0	0	0.27611	0.72389	0	-0.06765	0	0	0.68811	0.31189	0	0	-0.04562	0	0	0.68811	0.31189	0	0
1	06:09:03	LD222_(tall_wheat)	LD222_recurrent_parent_(tall)	KH2PO4	2021-03-15 14:59:12	90688	0.20762	0	0	0.05911	0.93287	0.00802	0	141.977	156.389	107.483	0	0.27057	0.6942	0.02035	0.01488	0	36.843	638.751	0.019	381.1	1.66764	71.224	0.46784	0	0	0.02424	0.45358	0.52218	0	0.06527	0	0	0.41869	0.56422	0.01709	0	0.05201	0	0	0.41869	0.56766	0.01365	0
2	06:01:01	Chulpan_(rye)	S._cereale_Chulpan	w/o_P	2021-03-15 15:10:19	0	0	0	0	0	0	0	0	0	0	0	0	0	0	0	0	0	0	0	0	0	0	0	0	0	0	0	0	0	0	0	0	0	0	0	0	0	0	0	0	0	0	0	0
2	06:01:02	Chulpan_(rye)	S._cereale_Chulpan	w/o_P	2021-03-15 15:10:19	3573.23	0.01172	0	0	0.52487	0.47513	0	0	138.195	0	201.799	0	0.05119	0.2489	0.67506	0.02485	0	8.746	25.856	0.001	2.983	6.57473	25.082	0.2388	0	0	0	0.97456	0.02544	0	-0.1138	0	0	0.92278	0.07722	0	0	-0.1608	0	0	0.92278	0.07722	0	0
2	06:01:03	Chulpan_(rye)	S._cereale_Chulpan	w/o_P	2021-03-15 15:10:19	2011.95	0.04809	0	0	0.25009	0.74991	0	0	80.435	0	44.333	0	0.88197	0.01985	0	0.09818	0	12.893	25.013	0.001	6.432	4.48088	27.318	0.16927	0	0	0.02542	0.97458	0	0	0.20269	0	0	0	1	0	0	0.25099	0	0	0	1	0	0
2	06:02:01	LD222_Rht17_NIL	T._durum_LD222_Rht17_NIL	w/o_P	2021-03-15 15:10:19	90.487	0.00629	0	0	0	1	0	0	90.113	0	206.897	0	0	0	1	0	0	13.85	1.004	0	1.004	4.17684	0	0.26241	0	0	0	1	0	0	-0.12236	0	0	1	0	0	0	-0.16292	0	0	1	0	0	0
2	06:02:02	LD222_Rht17_NIL	T._durum_LD222_Rht17_NIL	w/o_P	2021-03-15 15:10:19	3438.6	-0.01778	0	0	0.57113	0.42887	0	0	113.819	121.393	227.488	0	0	0.03762	0.74378	0.2186	0	10.06	30.211	0.001	6.197	5.72322	23.443	0.38472	0	0	0	0.85241	0.14759	0	-0.14421	0	0	0.91466	0.08534	0	0	-0.13456	0	0	0.91466	0.08534	0	0
2	06:02:03	LD222_Rht17_NIL	T._durum_LD222_Rht17_NIL	w/o_P	2021-03-15 15:10:19	14637.2	0.11496	0	0	0.08316	0.91684	0	0	143.236	131.928	151.24	0.00926	0.05661	0.7171	0.20665	0.01038	0	13.199	102.19	0.003	20.549	4.37883	42.66	0.43732	0	0	0	0.73096	0.26904	0	-0.09559	0	0	0.79339	0.20661	0	0	-0.08126	0	0.00742	0.78597	0.20661	0	0
2	06:03:01	LD222_(tall_wheat)	LD222_recurrent_parent_(tall)	w/o_P	2021-03-15 15:10:19	52075.4	0.12585	0	0.00409	0.19254	0.79676	0.00661	0	148.06	151.841	144.008	0	0.11921	0.62896	0.19395	0.05788	0	25.124	351.718	0.01	123.149	2.35514	61.599	0.47173	0	0	0.0079	0.51701	0.47509	0	-0.07077	0	0.01629	0.65788	0.321	0.00483	0	-0.04983	0.00093	0.01688	0.65637	0.31846	0.00552	0.00185
2	06:03:02	LD222_(tall_wheat)	LD222_recurrent_parent_(tall)	w/o_P	2021-03-15 15:10:19	13110.5	0.0753	0	0	0.1773	0.8227	0	0	174.438	160.828	186.56	0	0	0.41042	0.58958	0	0	11.586	75.159	0.002	15.276	4.97835	47.586	0.47598	0	0	0	0.60227	0.39773	0	-0.22318	0	0	1	0	0	0	-0.20966	0	0	1	0	0	0
2	06:03:03	LD222_(tall_wheat)	LD222_recurrent_parent_(tall)	w/o_P	2021-03-15 15:10:19	19787.8	0.20407	0	0	0.00439	0.99561	0	0	183.462	189.154	124.893	0	0.07796	0.90861	0.00905	0.00439	0	15.501	107.858	0.003	25.378	3.74127	61.925	0.46691	0	0	0	0.56202	0.43798	0	-0.03055	0	0	0.65116	0.34884	0	0	-0.02453	0	0	0.65116	0.34884	0	0
2	06:04:01	Chulpan_(rye)	S._cereale_Chulpan	Phosphorite	2021-03-15 15:10:19	7650.98	0.06029	0	0	0.28291	0.71709	0	0	106.984	64.697	100.991	0	0.37892	0.32492	0.22584	0.07032	0	12.523	71.515	0.002	13.753	4.61112	57.731	0.30968	0	0	0.04754	0.85884	0.09362	0	0.04379	0	0.00794	0.46707	0.51735	0.00763	0	0.04791	0	0.03237	0.44264	0.48326	0.04173	0
2	06:04:02	Chulpan_(rye)	S._cereale_Chulpan	Phosphorite	2021-03-15 15:10:19	5736.32	0.09389	0	0	0.21934	0.78066	0	0	125.914	0	141.087	0	0.16313	0.58677	0.22653	0.02357	0	13.689	45.557	0.001	6.7	4.22491	55.871	0.36664	0	0	0.02422	0.77524	0.20053	0	-0.04221	0	0	0.66836	0.33164	0	0	-0.07276	0	0.02368	0.64468	0.32055	0.01109	0
2	06:04:03	Chulpan_(rye)	S._cereale_Chulpan	Phosphorite	2021-03-15 15:10:19	0	0	0	0	0	0	0	0	0	0	0	0	0	0	0	0	0	0	0	0	0	0	0	0	0	0	0	0	0	0	0	0	0	0	0	0	0	0	0	0	0	0	0	0
2	06:05:01	LD222_Rht17_NIL	T._durum_LD222_Rht17_NIL	Phosphorite	2021-03-15 15:10:19	14875.5	0.18317	0	0.02172	0.09628	0.85658	0.02541	0	112.488	121.164	145.612	0	0.04832	0.78259	0.14328	0.02581	0	14.696	132.241	0.004	26.326	3.9412	31.314	0.57198	0	0	0	0.23712	0.76288	0	-0.11782	0	0.01948	0.76927	0.20413	0.00713	0	-0.08725	0	0.01517	0.77357	0.21126	0	0
2	06:05:02	LD222_Rht17_NIL	T._durum_LD222_Rht17_NIL	Phosphorite	2021-03-15 15:10:19	8072.78	0.01312	0	0	0.49886	0.50114	0	0	131.139	0	208.438	0	0.02729	0.29473	0.56527	0.1127	0	8.904	61.559	0.002	8.491	6.45903	30.027	0.39752	0	0	0	0.8628	0.1372	0	-0.14216	0	0	0.85667	0.14333	0	0	-0.1405	0	0	0.85667	0.14333	0	0
2	06:05:03	LD222_Rht17_NIL	T._durum_LD222_Rht17_NIL	Phosphorite	2021-03-15 15:10:19	20340.9	0.11347	0	0	0.16659	0.83341	0	0	155.204	140.24	141.835	0.00208	0.11975	0.6798	0.14222	0.05615	0	13.976	131.06	0.004	27.65	4.13994	63.432	0.43301	0	0	0.00603	0.65411	0.33986	0	-0.06432	0	0	0.74584	0.25416	0	0	-0.04539	0	0	0.74584	0.24814	0.00603	0
2	06:06:01	LD222_(tall_wheat)	LD222_recurrent_parent_(tall)	Phosphorite	2021-03-15 15:10:19	29829.7	0.06246	0	0	0.32141	0.67859	0	0	181.2	159.407	187.822	0.00275	0.05853	0.41397	0.46562	0.05913	0	12.907	164.623	0.005	35.961	4.47619	59.632	0.38034	0	0	0.00351	0.75018	0.24631	0	-0.1793	0	0.02163	0.86434	0.11403	0	0	-0.20134	0	0.06994	0.81603	0.11403	0	0
2	06:06:02	LD222_(tall_wheat)	LD222_recurrent_parent_(tall)	Phosphorite	2021-03-15 15:10:19	66937.5	0.18777	0	0	0.04223	0.95486	0.00291	0	124.128	127.216	120.602	0	0.1687	0.7754	0.03592	0.01998	0	34.878	539.26	0.016	295.113	1.74869	100.468	0.51291	0	0	0	0.42599	0.57401	0	-0.00359	0	0	0.54333	0.45491	0.00176	0	0.00622	0	0	0.54333	0.45545	0.00122	0
2	06:06:03	LD222_(tall_wheat)	LD222_recurrent_parent_(tall)	Phosphorite	2021-03-15 15:10:19	20576.5	0.15232	0	0.00515	0.08141	0.91059	0.00286	0	182.755	150.75	113.903	0	0.27596	0.65008	0.0504	0.02357	0	23.196	112.591	0.003	41.917	2.53861	84.983	0.43832	0	0	0.0262	0.51921	0.45459	0	0.02989	0	0	0.48995	0.49972	0.01033	0	0.01227	0	0	0.48995	0.51005	0	0
2	06:07:01	Chulpan_(rye)	S._cereale_Chulpan	KH2PO4	2021-03-15 15:10:19	5208.46	0.14629	0	0	0.02776	0.97224	0	0	77.498	79.686	84.6944	0	0.55715	0.44285	0	0	0	12.893	67.208	0.002	13.716	4.48079	49.881	0.41472	0	0	0	0.69671	0.30329	0	0.15721	0	0	0.08753	0.91247	0	0	0.12749	0	0	0.08753	0.91247	0	0
2	06:07:02	Chulpan_(rye)	S._cereale_Chulpan	KH2PO4	2021-03-15 15:10:19	17316.1	0.22286	0	0	0.02709	0.96199	0.01093	0	81.037	87.638	132.649	0	0.05097	0.90352	0.03767	0.00784	0	29.342	213.682	0.006	103.08	2.04059	46.115	0.57223	0	0	0.00462	0.30999	0.68539	0	-0.08425	0	0.00346	0.72631	0.27023	0	0	-0.04198	0	0	0.72977	0.27023	0	0
2	06:07:03	Chulpan_(rye)	S._cereale_Chulpan	KH2PO4	2021-03-15 15:10:19	48101.1	0.14209	0	0	0.18247	0.80879	0.00874	0	127.241	132.824	93.5214	0.00391	0.40402	0.46074	0.10589	0.02543	0	31.254	378.031	0.011	190.426	1.92732	89.31	0.35976	0	0	0.03699	0.61278	0.35023	0	0.0897	0	0.00077	0.32352	0.66575	0.00996	0	0.07116	0	0.02935	0.29494	0.66481	0.0109	0
2	06:08:01	LD222_Rht17_NIL	T._durum_LD222_Rht17_NIL	KH2PO4	2021-03-15 15:10:19	19589.8	0.2173	0	0	0.05394	0.92278	0.02327	0	161.414	169.324	111.473	0.00608	0.21281	0.74386	0.02043	0.01683	0	17.046	121.364	0.004	36.703	3.41087	97.141	0.55173	0	0	0	0.36698	0.63302	0	0.03347	0	0	0.45075	0.5417	0.00755	0	0.0263	0	0	0.45075	0.54925	0	0
2	06:08:02	LD222_Rht17_NIL	T._durum_LD222_Rht17_NIL	KH2PO4	2021-03-15 15:10:19	8113.11	0.09556	0	0	0.08528	0.91472	0	0	175.804	99.886	164.437	0	0.02904	0.58472	0.38624	0	0	20.025	46.149	0.001	16.228	2.92004	79.133	0.38958	0	0	0	0.82419	0.17581	0	-0.10195	0	0	0.82758	0.17242	0	0	-0.11158	0	0	0.82758	0.17242	0	0
2	06:08:03	LD222_Rht17_NIL	T._durum_LD222_Rht17_NIL	KH2PO4	2021-03-15 15:10:19	7422.01	0.12197	0	0	0.07255	0.92745	0	0	170.496	0	140.197	0	0.12324	0.70387	0.14568	0.02722	0	12.195	43.532	0.001	5.088	4.73308	42.847	0.41661	0	0	0	0.79244	0.20756	0	-0.04882	0	0	0.72332	0.27668	0	0	-0.05112	0	0	0.72332	0.27668	0	0
2	06:09:01	LD222_(tall_wheat)	LD222_recurrent_parent_(tall)	KH2PO4	2021-03-15 15:10:19	116520	0.20684	0	0	0.05048	0.93241	0.01711	0	163.593	168.169	103.535	0	0.28463	0.67236	0.02863	0.01439	0	35.117	712.259	0.021	323.034	1.73831	97.89	0.48949	0	0	0.01077	0.43114	0.55809	0	0.0831	0	0	0.33081	0.65972	0.00947	0	0.06761	0	0	0.33081	0.65181	0.01738	0
2	06:09:02	LD222_(tall_wheat)	LD222_recurrent_parent_(tall)	KH2PO4	2021-03-15 15:10:19	39312.2	0.20247	0	0	0.02464	0.97193	0.00343	0	156.824	144.513	138.802	0	0.06369	0.81591	0.118	0.00241	0	30.426	250.677	0.007	127.307	1.97455	79.243	0.57752	0	0	0.00744	0.27199	0.72056	0	-0.08683	0	0.01092	0.70388	0.2852	0	0	-0.05679	0	0	0.7148	0.2852	0	0
2	06:09:03	LD222_(tall_wheat)	LD222_recurrent_parent_(tall)	KH2PO4	2021-03-15 15:10:19	85785.7	0.2178	0	0	0.0386	0.94814	0.01326	0	146.113	159.306	113.227	0.00088	0.24305	0.71711	0.03536	0.00359	0	36.817	587.119	0.017	352.03	1.66864	76.792	0.48549	0	0	0.0141	0.41851	0.56739	0	0.03089	0.0006	0.00548	0.47219	0.51394	0.00779	0	0.03349	0	0	0.47826	0.51833	0.00341	0
1	05:01:01	Chulpan_(rye)	S._cereale_Chulpan	w/o_P	2021-03-17 15:15:10	20044.2	0.16527	0	0	0.11641	0.8802	0.00339	0	122.619	122.734	105.843	0	0.31988	0.5969	0.07108	0.01214	0	14.721	163.467	0.005	35.029	3.93458	85.612	0.49223	0	0	0.01498	0.37081	0.6142	0	0.03483	0	0.00375	0.45992	0.53634	0	0	0.05392	0	0.00375	0.45992	0.5082	0.02814	0
1	05:01:02	Chulpan_(rye)	S._cereale_Chulpan	w/o_P	2021-03-17 15:15:10	7493.01	0.11112	0	0	0.07807	0.92193	0	0	184.947	0	126.482	0	0.30863	0.48708	0.20428	0	0	11.735	40.514	0.001	8.634	4.91591	125.508	0.37388	0	0	0	0.81217	0.18783	0	0.01935	0	0	0.49937	0.50063	0	0	-0.02187	0	0	0.49937	0.48853	0.0121	0
1	05:01:03	Chulpan_(rye)	S._cereale_Chulpan	w/o_P	2021-03-17 15:15:10	15625	0.13732	0	0	0.08505	0.91495	0	0	138.24	142.855	147.974	0	0.04101	0.79432	0.14851	0.01616	0	14.483	113.028	0.003	25.54	3.99784	56.206	0.41223	0	0	0	0.64855	0.35145	0	-0.09195	0	0	0.84865	0.15135	0	0	-0.08005	0	0	0.84865	0.15135	0	0
1	05:02:01	LD222_Rht17_NIL	T._durum_LD222_Rht17_NIL	w/o_P	2021-03-17 15:15:10	32522.3	0.03379	0	0.024	0.29639	0.67961	0	0	183.565	131.112	158.098	0.00177	0.20088	0.39425	0.28991	0.1132	0	16.153	177.171	0.005	48.558	3.59394	121.189	0.39478	0	0	0.00369	0.68852	0.30779	0	-0.06279	0	0.02094	0.64846	0.3306	0	0	-0.06315	0.00529	0.01621	0.6479	0.3306	0	0
1	05:02:02	LD222_Rht17_NIL	T._durum_LD222_Rht17_NIL	w/o_P	2021-03-17 15:15:10	27605.4	0.03421	0	0	0.40736	0.59264	0	0	193.268	117.188	162.265	0.00394	0.24556	0.37587	0.27815	0.09648	0	14.248	142.835	0.004	34.335	4.06234	96.629	0.3244	0	0	0.05177	0.75783	0.1904	0	-0.03779	0	0	0.66716	0.32464	0.0082	0	-0.01471	0	0.00438	0.66278	0.27041	0.06243	0
1	05:02:03	LD222_Rht17_NIL	T._durum_LD222_Rht17_NIL	w/o_P	2021-03-17 15:15:10	24792.1	0.12134	0	0	0.13977	0.86023	0	0	172.103	161.844	158.687	0	0.08867	0.62309	0.26427	0.02397	0	17.145	144.054	0.004	39.564	3.39181	82.992	0.45921	0	0	0.04386	0.45047	0.50567	0	-0.13283	0	0.03068	0.80989	0.15943	0	0	-0.09413	0	0	0.84057	0.15233	0.00711	0
1	05:03:01	LD222_(tall_wheat)	LD222_recurrent_parent_(tall)	w/o_P	2021-03-17 15:15:10	17529.9	0.2711	0	0	0.00825	0.91315	0.07861	0	256.807	120.402	127.793	0	0.07651	0.8943	0.02919	0	0	17.244	68.261	0.002	20.322	3.37295	197.566	0.6232	0	0	0	0.14926	0.85074	0	-0.03873	0	0.01564	0.62273	0.36163	0	0	-0.03092	0	0.02389	0.61448	0.36163	0	0
1	05:03:02	LD222_(tall_wheat)	LD222_recurrent_parent_(tall)	w/o_P	2021-03-17 15:15:10	81766	0.22593	0	0	0.01974	0.97408	0.00618	0	221.041	234.206	149.085	0.00177	0.02058	0.88465	0.09299	0	0	25.738	369.913	0.011	159.334	2.30261	122.999	0.61942	0	0	0.00266	0.13267	0.86467	0	-0.18952	0	0.00761	0.90245	0.08994	0	0	-0.10579	0	0.00393	0.90614	0.08994	0	0
1	05:03:03	LD222_(tall_wheat)	LD222_recurrent_parent_(tall)	w/o_P	2021-03-17 15:15:10	2441.9	0.09378	0	0	0.24601	0.75399	0	0	217.928	0	176.971	0	0.04167	0.44303	0.5153	0	0	17.923	11.205	0	3.955	3.24911	115.102	0.32367	0	0	0.20057	0.61284	0.18659	0	-0.12705	0	0	0.86075	0.13925	0	0	-0.17698	0	0	0.86075	0.13925	0	0
1	05:04:01	Chulpan_(rye)	S._cereale_Chulpan	Phosphorite	2021-03-17 15:15:10	17736.7	0.18355	0	0	0.03985	0.96015	0	0	156.88	136.197	121.406	0	0.06459	0.90173	0.01671	0.01697	0	13.965	113.059	0.003	25.722	4.14294	91.067	0.46816	0	0	0.00681	0.51669	0.47651	0	-0.00675	0	0	0.53383	0.46617	0	0	-0.00582	0	0	0.53383	0.46617	0	0
1	05:04:02	Chulpan_(rye)	S._cereale_Chulpan	Phosphorite	2021-03-17 15:15:10	14908.4	0.05344	0	0	0.25007	0.74993	0	0	139.991	102.347	177.872	0	0.13562	0.39637	0.44445	0.02356	0	10.795	106.495	0.003	20.907	5.33823	69.27	0.34407	0	0	0.02834	0.86027	0.11138	0	-0.09819	0	0	0.83499	0.16501	0	0	-0.10172	0	0.0048	0.83019	0.12107	0.04394	0
1	05:04:03	Chulpan_(rye)	S._cereale_Chulpan	Phosphorite	2021-03-17 15:15:10	55624.8	0.12907	0	0	0.09399	0.90601	0	0	173.117	189.9	148.188	0	0.12155	0.67811	0.18114	0.0192	0	16.878	321.314	0.009	90.948	3.4439	100.146	0.37125	0	0	0.02765	0.68522	0.28713	0	-0.083	0	0.00467	0.79107	0.19903	0.00523	0	-0.08048	0	0.00644	0.78929	0.19995	0.00432	0
1	05:05:01	LD222_Rht17_NIL	T._durum_LD222_Rht17_NIL	Phosphorite	2021-03-17 15:15:10	2448.94	-0.06037	0	0	0.91083	0.08917	0	0	189.599	0	227.917	0	0	0	1	0	0	32.831	12.916	0	6.654	1.84437	3.77	0.20669	0	0	0.08213	0.91787	0	0	-0.17928	0	0	1	0	0	0	-0.28109	0	0	1	0	0	0
1	05:05:02	LD222_Rht17_NIL	T._durum_LD222_Rht17_NIL	Phosphorite	2021-03-17 15:15:10	33660.3	0.09461	0	0	0.11917	0.88083	0	0	179.706	172.767	178.445	0	0.01281	0.55462	0.42087	0.0117	0	16.113	187.307	0.005	49.546	3.60281	71.989	0.45209	0	0	0	0.65295	0.34705	0	-0.18979	0	0.00427	0.96951	0.02622	0	0	-0.16944	0	0	0.97378	0.02622	0	0
1	05:05:03	LD222_Rht17_NIL	T._durum_LD222_Rht17_NIL	Phosphorite	2021-03-17 15:15:10	13604.4	0.06538	0	0	0.25022	0.74978	0	0	214.328	0	175.818	0	0.17341	0.35351	0.46185	0.01124	0	9.886	63.474	0.002	7.836	5.82287	114.785	0.28694	0	0	0.02071	0.88117	0.09812	0	-0.11753	0	0	0.80495	0.18298	0.01207	0	-0.16339	0	0.02071	0.78424	0.18298	0.01207	0
1	05:06:01	LD222_(tall_wheat)	LD222_recurrent_parent_(tall)	Phosphorite	2021-03-17 15:15:10	95932.8	0.16741	0	0	0.10405	0.89205	0.0039	0	154.469	183.531	117.462	0.00136	0.21133	0.67862	0.09307	0.01562	0	36.594	621.05	0.018	313.225	1.67739	102.308	0.4982	0	0	0.01559	0.45178	0.53263	0	-0.00109	0	0.00367	0.48929	0.50104	0.006	0	0.01068	0	0.00711	0.48585	0.49456	0.0104	0.00208
1	05:06:02	LD222_(tall_wheat)	LD222_recurrent_parent_(tall)	Phosphorite	2021-03-17 15:15:10	73494.7	0.24213	0	0	0.04115	0.94004	0.01881	0	208.692	218.157	129.849	0	0.11439	0.80983	0.06839	0.00739	0	25.555	352.168	0.01	148.351	2.31803	91.492	0.636	0	0	0	0.16206	0.83794	0	-0.05572	0	0.00957	0.63658	0.34066	0.01319	0	-0.01866	0	0.00398	0.64217	0.35272	0.00113	0
1	05:06:03	LD222_(tall_wheat)	LD222_recurrent_parent_(tall)	Phosphorite	2021-03-17 15:15:10	1492.29	0.1429	0	0	0.21462	0.78538	0	0	141.003	0	112.79	0	0.27921	0.48445	0.20409	0.03226	0	16.89	10.583	0	2.228	3.44142	38.73	0.36513	0	0	0	0.86409	0.13591	0	0.08982	0	0	0.30514	0.69486	0	0	0.05193	0	0	0.30514	0.69486	0	0
1	05:07:01	Chulpan_(rye)	S._cereale_Chulpan	KH2PO4	2021-03-17 15:15:10	18643.3	0.25112	0	0	0.04433	0.91726	0.03841	0	90.118	79.221	111.647	0	0.16244	0.78434	0.04007	0.01314	0	20.909	206.876	0.006	73.195	2.80176	41.065	0.51849	0	0	0	0.41526	0.58474	0	0.06643	0	0	0.34247	0.64264	0.01489	0	0.03161	0	0	0.34247	0.65753	0	0
1	05:07:02	Chulpan_(rye)	S._cereale_Chulpan	KH2PO4	2021-03-17 15:15:10	29511.7	0.20002	0	0	0.03564	0.95277	0.01159	0	129.767	137.057	127.06	0	0.10393	0.84133	0.04053	0.01421	0	23.847	227.42	0.007	89.833	2.47321	64.009	0.51974	0	0	0	0.41215	0.58785	0	-0.02271	0	0	0.62733	0.37022	0.00245	0	-0.01794	0	0	0.62733	0.37267	0	0
1	05:07:03	Chulpan_(rye)	S._cereale_Chulpan	KH2PO4	2021-03-17 15:15:10	43770	0.21532	0	0	0.04848	0.94427	0.00726	0	135.17	144.453	127.316	0	0.06812	0.85704	0.06015	0.01468	0	22.304	323.816	0.009	119.448	2.63466	37.584	0.50143	0	0	0.00678	0.43427	0.55894	0	-0.02735	0	0	0.6569	0.3431	0	0	-0.02182	0	0	0.6569	0.3431	0	0
1	05:08:01	LD222_Rht17_NIL	T._durum_LD222_Rht17_NIL	KH2PO4	2021-03-17 15:15:10	9234.84	0.13366	0	0	0.19247	0.80753	0	0	187.739	0	168.062	0	0.01357	0.58083	0.38915	0.01645	0	25.073	49.19	0.001	18.2	2.35959	112.277	0.50885	0	0	0	0.46168	0.53832	0	-0.18503	0	0.01382	0.88292	0.10326	0	0	-0.15358	0	0.00752	0.88922	0.10326	0	0
1	05:08:02	LD222_Rht17_NIL	T._durum_LD222_Rht17_NIL	KH2PO4	2021-03-17 15:15:10	5117.35	0.02659	0	0	0.35777	0.64223	0	0	217.939	0	184.8	0	0.18932	0.31463	0.35372	0.14233	0	16.007	23.481	0.001	5.032	3.62594	133.911	0.37158	0	0	0.06994	0.74674	0.18333	0	-0.04686	0	0	0.712	0.21806	0.06994	0	-0.02712	0	0	0.712	0.18407	0.10393	0
1	05:08:03	LD222_Rht17_NIL	T._durum_LD222_Rht17_NIL	KH2PO4	2021-03-17 15:15:10	12122.6	0.09963	0	0	0.1463	0.8537	0	0	142.281	143.481	135.651	0	0.20247	0.61202	0.15302	0.03248	0	23.481	85.202	0.002	33.62	2.50953	71.439	0.32687	0	0	0.04219	0.7532	0.20462	0	-0.03122	0	0.01994	0.61116	0.3689	0	0	-0.03974	0.00619	0.00632	0.6186	0.3689	0	0
1	05:09:01	LD222_(tall_wheat)	LD222_recurrent_parent_(tall)	KH2PO4	2021-03-17 15:15:10	104129	0.20702	0	0	0.10444	0.85471	0.04085	0	192.696	216.162	157.289	0	0.02723	0.67962	0.29098	0.00217	0	30.091	540.378	0.016	248.662	1.99441	105.838	0.61163	0	0	0.00404	0.22261	0.77335	0	-0.19789	0.00222	0.0689	0.7531	0.17418	0.0016	0	-0.13409	0	0.0237	0.80052	0.17578	0	0
1	05:09:02	LD222_(tall_wheat)	LD222_recurrent_parent_(tall)	KH2PO4	2021-03-17 15:15:10	128703	0.16785	0	0	0.06909	0.92834	0.00257	0	235.603	261.079	146.281	0.00092	0.12786	0.66655	0.19779	0.00687	0	22.055	546.272	0.016	200.66	2.66294	163.588	0.50556	0	0	0.01324	0.35452	0.63224	0	-0.09858	0	0.0072	0.71814	0.26606	0.0086	0	-0.07018	0	0.00217	0.72317	0.25155	0.02311	0
1	05:09:03	LD222_(tall_wheat)	LD222_recurrent_parent_(tall)	KH2PO4	2021-03-17 15:15:10	40338.7	0.15315	0	0	0.13722	0.851	0.01178	0	147.7	149.01	134.403	0	0.16324	0.63093	0.16103	0.04481	0	33.615	273.112	0.008	145.477	1.80623	40.41	0.43481	0	0	0.02783	0.48805	0.48413	0	-0.02928	0	0.00129	0.61928	0.36671	0.01272	0	-0.03738	0	0.00259	0.61797	0.37943	0	0
2	05:01:01	Chulpan_(rye)	S._cereale_Chulpan	w/o_P	2021-03-17 15:33:10	83475.8	0.22337	0	0	0.05349	0.92728	0.01923	0	174.302	193.146	116.738	0.00231	0.16914	0.73843	0.07702	0.0131	0	19.4	478.916	0.014	147.512	3.01035	109.078	0.55145	0	0	0.0056	0.29136	0.70304	0	0.03226	0	0.00179	0.45737	0.53252	0.00833	0	0.00726	0	0.01905	0.44011	0.5323	0.00854	0
2	05:01:02	Chulpan_(rye)	S._cereale_Chulpan	w/o_P	2021-03-17 15:33:10	7054.18	0.06883	0	0	0.25693	0.74307	0	0	104.612	0	155.836	0	0.10011	0.55287	0.29026	0.05676	0	14.769	67.432	0.002	17.043	3.92208	40.308	0.29739	0	0	0.02629	0.85252	0.12119	0	-0.05144	0	0	0.68702	0.31298	0	0	-0.05127	0	0	0.68702	0.29553	0.00964	0.00781
2	05:01:03	Chulpan_(rye)	S._cereale_Chulpan	w/o_P	2021-03-17 15:33:10	889.634	0.04872	0	0	0.22708	0.77292	0	0	109.261	0	96.4903	0	0.52988	0.39675	0.07338	0	0	13.079	8.142	0	2.326	4.4184	57.155	0.19822	0	0	0.09022	0.90978	0	0	0.03086	0	0	0.47012	0.52988	0	0	0.06259	0	0	0.47012	0.52988	0	0
2	05:02:01	LD222_Rht17_NIL	T._durum_LD222_Rht17_NIL	w/o_P	2021-03-17 15:33:10	2083.21	-0.01521	0	0	0.57132	0.42868	0	0	128.643	0	334.949	0.03158	0.13431	0.29437	0.14397	0.39577	0	16.909	16.194	0	3.374	3.43778	25.92	0.28961	0	0	0.04313	0.8295	0.12736	0	0.02377	0	0	0.38678	0.61322	0	0	0.04327	0	0	0.38678	0.61322	0	0
2	05:02:02	LD222_Rht17_NIL	T._durum_LD222_Rht17_NIL	w/o_P	2021-03-17 15:33:10	33961.5	0.09625	0	0	0.16786	0.83214	0	0	194.258	195.095	177.871	0	0.00927	0.48728	0.46384	0.03961	0	17.737	174.827	0.005	54.708	3.28215	105.229	0.50349	0	0	0.00715	0.43229	0.56055	0	-0.2195	0	0.04757	0.87457	0.07785	0	0	-0.18655	0	0.00921	0.91294	0.0707	0.00715	0
2	05:02:03	LD222_Rht17_NIL	T._durum_LD222_Rht17_NIL	w/o_P	2021-03-17 15:33:10	4825.83	0.12678	0	0	0.06159	0.93841	0	0	185.465	0	63.1757	0	0.85641	0.14359	0	0	0	26.298	26.02	0.001	11.025	2.25695	26.089	0.25454	0	0	0.09166	0.73557	0.17277	0	0.24423	0	0	0	0.95224	0.04776	0	0.23999	0	0	0	0.98216	0.01784	0
2	05:03:01	LD222_(tall_wheat)	LD222_recurrent_parent_(tall)	w/o_P	2021-03-17 15:33:10	128023	0.22814	0	0.00209	0.07622	0.88306	0.03863	0	224.62	252.017	122.461	0	0.12328	0.77109	0.07995	0.02567	0	24.864	569.955	0.017	191.32	2.37813	141.951	0.5799	0	0	0.01234	0.22747	0.76019	0	-0.01117	0	0.00906	0.5545	0.4333	0.00315	0	0.00284	0	0.00084	0.56271	0.42784	0.00861	0
2	05:03:02	LD222_(tall_wheat)	LD222_recurrent_parent_(tall)	w/o_P	2021-03-17 15:33:10	59180.4	0.21986	0	0	0.06081	0.93434	0.00485	0	158.047	168.461	122.477	0.00203	0.16771	0.75501	0.06839	0.00686	0	26.927	374.448	0.011	168.526	2.20805	76.254	0.565	0	0	0	0.25627	0.74373	0	0.00239	0	0	0.56098	0.4316	0.00742	0	0.00722	0	0	0.56098	0.43497	0.00404	0
2	05:03:03	LD222_(tall_wheat)	LD222_recurrent_parent_(tall)	w/o_P	2021-03-17 15:33:10	96012.1	0.14188	0.00109	0.00279	0.18739	0.797	0.01173	0	155.66	166.627	129.227	0.0035	0.2062	0.57487	0.16917	0.04626	0	32.159	616.808	0.018	321.894	1.87863	69.324	0.36113	0.00191	0.00076	0.0698	0.55518	0.37235	0	-0.01785	0.00376	0.00674	0.59391	0.38459	0.01099	0	-0.00894	0	0.0022	0.60222	0.38118	0.01149	0.00291
2	05:04:01	Chulpan_(rye)	S._cereale_Chulpan	Phosphorite	2021-03-17 15:33:10	11407.2	0.08251	0	0	0.16866	0.83134	0	0	149.372	124.509	164.963	0.00908	0.03612	0.63545	0.2803	0.03904	0	11.152	76.367	0.002	12.588	5.16906	50.022	0.33867	0	0	0.01868	0.90628	0.07504	0	-0.10335	0	0	0.89385	0.10615	0	0	-0.12033	0	0	0.89385	0.10615	0	0
2	05:04:02	Chulpan_(rye)	S._cereale_Chulpan	Phosphorite	2021-03-17 15:33:10	4285.8	0.06475	0	0	0.27069	0.72931	0	0	164.61	0	183.762	0	0	0.47188	0.45882	0.0693	0	11.176	26.036	0.001	5.36	5.15819	106.142	0.35892	0	0	0	1	0	0	-0.1615	0	0	0.9418	0.0582	0	0	-0.18552	0	0	0.9418	0.0582	0	0
2	05:04:03	Chulpan_(rye)	S._cereale_Chulpan	Phosphorite	2021-03-17 15:33:10	34138.5	0.15061	0	0	0.08841	0.91159	0	0	175.071	187.83	143.771	0	0.06742	0.79484	0.10882	0.02892	0	18.809	194.999	0.006	65	3.10124	93.974	0.47242	0	0	0	0.56295	0.43705	0	-0.08045	0	0	0.79422	0.20578	0	0	-0.06095	0	0	0.79422	0.20318	0.0026	0
2	05:05:01	LD222_Rht17_NIL	T._durum_LD222_Rht17_NIL	Phosphorite	2021-03-17 15:33:10	36525.3	0.22227	0	0	0.0545	0.91605	0.02945	0	168.273	158.992	123.77	0.00205	0.08999	0.84143	0.04801	0.01852	0	13.275	217.059	0.006	41.742	4.35415	93.263	0.5709	0	0	0	0.25596	0.74404	0	-0.00662	0	0	0.56233	0.43767	0	0	-0.00603	0	0	0.56233	0.43767	0	0
2	05:05:02	LD222_Rht17_NIL	T._durum_LD222_Rht17_NIL	Phosphorite	2021-03-17 15:33:10	17822.5	0.08137	0	0	0.16758	0.83242	0	0	189.93	165.823	175.88	0	0.02468	0.57822	0.39453	0.00257	0	17.284	93.837	0.003	27.369	3.3653	92.677	0.45939	0	0	0	0.68648	0.31352	0	-0.16131	0	0	0.95982	0.04018	0	0	-0.13935	0	0	0.95982	0.04018	0	0
2	05:05:03	LD222_Rht17_NIL	T._durum_LD222_Rht17_NIL	Phosphorite	2021-03-17 15:33:10	43606.6	0.09729	0	0	0.12471	0.87529	0	0	203.206	183.067	138.487	0	0.24474	0.56988	0.16228	0.0231	0	10.482	214.594	0.006	34.981	5.49561	105.46	0.3439	0	0	0.04729	0.75852	0.19419	0	-0.0416	0	0	0.66152	0.33848	0	0	-0.01936	0	0	0.66152	0.29555	0.04293	0
2	05:06:01	LD222_(tall_wheat)	LD222_recurrent_parent_(tall)	Phosphorite	2021-03-17 15:33:10	147521	0.14801	0	0	0.21455	0.7636	0.02186	0	180.593	203.827	137.522	0.001	0.12962	0.59793	0.24586	0.02559	0	31.674	816.874	0.024	360.725	1.90438	124.131	0.46577	0	0	0.02145	0.49147	0.48708	0	-0.03653	0	0.00128	0.59501	0.40141	0.00231	0	-0.05031	0	0.00311	0.59317	0.39864	0.00507	0
2	05:06:02	LD222_(tall_wheat)	LD222_recurrent_parent_(tall)	Phosphorite	2021-03-17 15:33:10	117882	0.16368	0	0	0.08631	0.90641	0.00728	0	145.578	150.392	139.645	0	0.16075	0.64667	0.1743	0.01829	0	32.139	809.75	0.024	420.596	1.87971	77.031	0.51034	0	0	0.01728	0.38832	0.5944	0	-0.09104	0.00067	0.01709	0.63492	0.34389	0.00344	0	-0.05582	0	0.00624	0.64644	0.34074	0.00658	0
2	05:06:03	LD222_(tall_wheat)	LD222_recurrent_parent_(tall)	Phosphorite	2021-03-17 15:33:10	24395.1	0.08911	0	0	0.12182	0.87818	0	0	163.183	129.751	84.151	0	0.5356	0.39487	0.04896	0.02057	0	19.464	149.495	0.004	52.834	3.00077	67.67	0.23824	0	0	0.02677	0.9384	0.03482	0	0.07668	0	0	0.2861	0.7139	0	0	0.09618	0	0	0.2861	0.7139	0	0
2	05:07:01	Chulpan_(rye)	S._cereale_Chulpan	KH2PO4	2021-03-17 15:33:10	25201.8	0.12145	0	0.00268	0.19199	0.80533	0	0	102.884	112.675	137.62	0.00153	0.1768	0.56795	0.20275	0.05097	0	17.58	244.955	0.007	66.806	3.31051	59.436	0.44996	0	0	0	0.52441	0.47559	0	-0.04776	0	0.01204	0.61638	0.37159	0	0	-0.0419	0	0.00749	0.62092	0.37159	0	0
2	05:07:02	Chulpan_(rye)	S._cereale_Chulpan	KH2PO4	2021-03-17 15:33:10	18581.3	0.11079	0	0	0.0873	0.9096	0.0031	0	121.557	77.509	152.302	0.00323	0.06908	0.66778	0.24561	0.01431	0	22.91	152.861	0.004	58.32	2.56856	95.081	0.43209	0	0	0.00488	0.71676	0.27836	0	-0.07548	0	0	0.80693	0.19307	0	0	-0.07035	0	0	0.80693	0.18819	0.00488	0
2	05:07:03	Chulpan_(rye)	S._cereale_Chulpan	KH2PO4	2021-03-17 15:33:10	10212.9	0.18045	0	0	0.06684	0.92149	0.01167	0	103.141	106.648	99.8726	0.00338	0.3868	0.55483	0.05156	0.00343	0	26.359	99.019	0.003	45.008	2.2521	46.881	0.40536	0	0	0.02229	0.57233	0.40538	0	0.06717	0	0	0.36072	0.63351	0.00577	0	0.0714	0	0	0.36072	0.612	0.02728	0
2	05:08:01	LD222_Rht17_NIL	T._durum_LD222_Rht17_NIL	KH2PO4	2021-03-17 15:33:10	51526.4	0.16274	0	0	0.19255	0.78384	0.02362	0	150.561	152.315	130.693	0.0007	0.15971	0.62693	0.16187	0.05079	0	28.491	342.231	0.01	145.715	2.09624	93.448	0.50262	0	0	0.01763	0.40266	0.57972	0	0.00121	0	0.00073	0.57576	0.40783	0.01567	0	-0.01491	0	0	0.5765	0.42145	0.00205	0
2	05:08:02	LD222_Rht17_NIL	T._durum_LD222_Rht17_NIL	KH2PO4	2021-03-17 15:33:10	13726	0.16402	0	0	0.09705	0.90295	0	0	192.446	0	110.394	0	0.22185	0.74469	0.02268	0.01079	0	14.065	71.324	0.002	18.863	4.11412	113.306	0.46084	0	0	0.02074	0.54357	0.43569	0	0.02439	0	0	0.46118	0.53882	0	0	0.03489	0	0	0.46118	0.53882	0	0
2	05:08:03	LD222_Rht17_NIL	T._durum_LD222_Rht17_NIL	KH2PO4	2021-03-17 15:33:10	2444.78	0.12776	0	0	0.27203	0.72797	0	0	178.633	0	54.2934	0	0.83428	0.12129	0	0.04443	0	20.711	13.686	0	5.703	2.82738	93.249	0.34138	0	0	0.08476	0.77316	0.14208	0	0.39946	0	0	0.06065	0.62905	0.3103	0	0.30739	0	0	0.06065	0.76398	0.17537	0
2	05:09:01	LD222_(tall_wheat)	LD222_recurrent_parent_(tall)	KH2PO4	2021-03-17 15:33:10	62112.6	0.20419	0	0.00193	0.1063	0.85357	0.0382	0	124.554	129.886	136.371	0	0.11244	0.70806	0.15491	0.02458	0	35.486	498.678	0.014	225.894	1.72256	52.031	0.62514	0	0	0.00205	0.1751	0.82285	0	-0.07447	0.00394	0.02613	0.64144	0.32177	0.00672	0	-0.03828	0	0	0.67151	0.32712	0.00137	0
2	05:09:02	LD222_(tall_wheat)	LD222_recurrent_parent_(tall)	KH2PO4	2021-03-17 15:33:10	139301	0.21506	0	0.00171	0.06939	0.92412	0.00478	0	209.37	223.334	141.662	0	0.06667	0.79243	0.12631	0.01459	0	26.66	665.335	0.019	290.667	2.22857	135.779	0.53387	0	0	0.00518	0.37592	0.6189	0	-0.10963	0	0.00954	0.78366	0.20679	0	0	-0.07348	0	0.00254	0.79066	0.20346	0.00333	0
2	05:09:03	LD222_(tall_wheat)	LD222_recurrent_parent_(tall)	KH2PO4	2021-03-17 15:33:10	68612.6	0.16591	0.00126	0.00103	0.12599	0.85831	0.01341	0	123.252	126.004	132.939	0.00126	0.1406	0.67999	0.15957	0.01859	0	38.583	556.685	0.016	342.7	1.60343	49.044	0.37884	0.00226	0.00103	0.07555	0.51991	0.40125	0	-0.01219	0.00178	0	0.65556	0.33101	0.01165	0	-0.03071	0	0.00595	0.65364	0.33524	0.00367	0.0015
1	06:01:01	Chulpan_(rye)	S._cereale_Chulpan	w/o_P	2021-03-17 15:47:51	22065.8	0.15745	0	0	0.06474	0.93526	0	0	139.444	135.987	105.513	0	0.36761	0.60407	0.0219	0.00642	0	12.012	158.242	0.005	30.204	4.80399	80.258	0.41246	0	0	0.01544	0.64111	0.34346	0	0.07992	0	0	0.46268	0.51792	0.0194	0	0.07734	0	0	0.46268	0.50508	0.03224	0
1	06:01:02	Chulpan_(rye)	S._cereale_Chulpan	w/o_P	2021-03-17 15:47:51	2018.41	0.0411	0	0	0.17983	0.82017	0	0	174.486	0	193.392	0	0	0.26937	0.73063	0	0	9.567	11.568	0	2.892	6.01537	46.985	0.31246	0	0	0	1	0	0	-0.1684	0	0	1	0	0	0	-0.22786	0	0	1	0	0	0
1	06:01:03	Chulpan_(rye)	S._cereale_Chulpan	w/o_P	2021-03-17 15:47:51	6907.67	0.12822	0	0	0.05998	0.94002	0	0	96.095	94.624	112.991	0	0.29572	0.62913	0.04632	0.02883	0	14.2	71.883	0.002	18.104	4.07587	27.638	0.36553	0	0	0.03247	0.64422	0.32332	0	0.02236	0	0	0.54886	0.45114	0	0	0.04203	0	0	0.54886	0.40662	0.04452	0
1	06:02:01	LD222_Rht17_NIL	T._durum_LD222_Rht17_NIL	w/o_P	2021-03-17 15:47:51	869.077	0.01799	0	0	0.55617	0.44383	0	0	178.604	0	337.652	0	0.44383	0	0.44173	0.11444	0	13.061	4.866	0	1.39	4.42429	153.509	0.17623	0	0	0	1	0	0	0.11096	0	0	0.44173	0.55827	0	0	0.04772	0	0	0.44173	0.55827	0	0
1	06:02:02	LD222_Rht17_NIL	T._durum_LD222_Rht17_NIL	w/o_P	2021-03-17 15:47:51	44560.1	0.08779	0	0	0.16661	0.83339	0	0	189.044	205.229	178.989	0.00273	0.03099	0.48394	0.45656	0.02579	0	15.972	235.713	0.007	66.678	3.6337	96.318	0.47342	0	0	0.00294	0.49838	0.49869	0	-0.19397	0	0.02356	0.90191	0.07454	0	0	-0.16282	0	0.01526	0.9102	0.07454	0	0
1	06:02:03	LD222_Rht17_NIL	T._durum_LD222_Rht17_NIL	w/o_P	2021-03-17 15:47:51	10827.3	0.11255	0	0	0.06978	0.93022	0	0	154.911	138.855	169.232	0	0	0.64747	0.35253	0	0	10.875	69.894	0.002	9.64	5.29913	41.438	0.48042	0	0	0	0.45156	0.54844	0	-0.16447	0	0	0.98637	0.01363	0	0	-0.13546	0	0	0.98637	0.01363	0	0
1	06:03:01	LD222_(tall_wheat)	LD222_recurrent_parent_(tall)	w/o_P	2021-03-17 15:47:51	79544.2	0.06287	0.00176	0.01103	0.30988	0.67455	0.00277	0	231.123	246.045	176.504	0.00446	0.04307	0.49236	0.41135	0.04876	0	28.001	344.164	0.01	150.02	2.12984	144.959	0.47269	0	0	0.00464	0.50202	0.49334	0	-0.16157	0	0.03341	0.80256	0.16403	0	0	-0.14322	0.00186	0.03332	0.80079	0.16403	0	0
1	06:03:02	LD222_(tall_wheat)	LD222_recurrent_parent_(tall)	w/o_P	2021-03-17 15:47:51	88224.4	0.15913	0	0	0.06721	0.93099	0.00181	0	200.758	213.927	155.8	0	0.04482	0.74259	0.21182	0.00077	0	23.778	439.456	0.013	177.553	2.47999	98.729	0.52239	0	0	0	0.34017	0.65983	0	-0.14907	0	0.00395	0.89106	0.10498	0	0	-0.10985	0	0	0.89502	0.10498	0	0
1	06:03:03	LD222_(tall_wheat)	LD222_recurrent_parent_(tall)	w/o_P	2021-03-17 15:47:51	6424.18	0.14176	0	0	0.1349	0.8651	0	0	243.592	0	139.942	0	0.10668	0.59888	0.27967	0.01477	0	19.254	26.373	0.001	9.768	3.03227	85.201	0.42665	0	0	0.08012	0.40897	0.51091	0	0.01362	0	0	0.58661	0.41339	0	0	-0.03961	0	0	0.58661	0.41339	0	0
1	06:04:01	Chulpan_(rye)	S._cereale_Chulpan	Phosphorite	2021-03-17 15:47:51	11418.8	0.08259	0	0	0.28224	0.71776	0	0	119.374	64.55	125.405	0.01036	0.27825	0.4106	0.24873	0.05207	0	14.413	95.656	0.003	23.557	4.01705	76.978	0.36326	0	0	0.02866	0.76602	0.20532	0	-0.00637	0	0.00305	0.56232	0.43463	0	0	-0.01573	0	0	0.56537	0.43463	0	0
1	06:04:02	Chulpan_(rye)	S._cereale_Chulpan	Phosphorite	2021-03-17 15:47:51	75625	0.13267	0	0	0.10482	0.89518	0	0	148.11	165.268	149.392	0	0.11883	0.68348	0.17918	0.0185	0	17.272	510.599	0.015	145.568	3.36767	87.835	0.45793	0	0	0.00897	0.57886	0.41217	0	-0.09754	0	0	0.81232	0.18768	0	0	-0.06559	0	0	0.81232	0.17894	0.00874	0
1	06:04:03	Chulpan_(rye)	S._cereale_Chulpan	Phosphorite	2021-03-17 15:47:51	6822.79	0.12185	0	0	0.11842	0.88158	0	0	137.238	109.758	148.943	0	0.08117	0.70701	0.17428	0.03753	0	10.014	49.715	0.001	7.812	5.74973	67.842	0.37892	0	0	0	0.82817	0.17183	0	-0.09074	0	0	0.70289	0.29711	0	0	-0.09043	0	0	0.70289	0.29711	0	0
1	06:05:01	LD222_Rht17_NIL	T._durum_LD222_Rht17_NIL	Phosphorite	2021-03-17 15:47:51	36006.7	0.11024	0	0.01004	0.23225	0.74149	0.01623	0	187.543	162.932	154.542	0	0.05783	0.64279	0.24564	0.05374	0	14.38	191.992	0.006	41.238	4.02596	106.142	0.52819	0	0	0.01849	0.35177	0.62974	0	-0.13007	0	0.02889	0.76979	0.20132	0	0	-0.10508	0.00512	0.04281	0.75075	0.19013	0.01119	0
1	06:05:02	LD222_Rht17_NIL	T._durum_LD222_Rht17_NIL	Phosphorite	2021-03-17 15:47:51	42362.3	0.06861	0	0	0.25744	0.74256	0	0	202.1	212.265	183.567	0.00306	0.06083	0.43054	0.43084	0.07473	0	16.155	209.611	0.006	56.601	3.59366	102.578	0.38877	0	0	0.02658	0.71173	0.26169	0	-0.15605	0	0.00908	0.87572	0.1152	0	0	-0.14587	0	0	0.8848	0.1152	0	0
1	06:05:03	LD222_Rht17_NIL	T._durum_LD222_Rht17_NIL	Phosphorite	2021-03-17 15:47:51	11944.4	0.06083	0	0.0144	0.26799	0.7176	0	0	154.836	161.141	180.429	0	0.02163	0.50857	0.43356	0.03624	0	9.482	77.143	0.002	8.288	6.06846	49.728	0.4617	0	0	0	0.65752	0.34248	0	-0.16835	0	0	0.96753	0.03247	0	0	-0.14766	0	0	0.96753	0.03247	0	0
1	06:06:01	LD222_(tall_wheat)	LD222_recurrent_parent_(tall)	Phosphorite	2021-03-17 15:47:51	8729.94	0.02564	0	0	0.4323	0.5677	0	0	160.75	164.336	197.332	0	0.08507	0.28731	0.52935	0.09827	0	13.249	54.308	0.002	10.697	4.36272	33.258	0.28745	0	0	0.11557	0.79689	0.08754	0	-0.1261	0	0.0169	0.74841	0.23469	0	0	-0.13248	0	0.03069	0.73461	0.22285	0.01184	0
1	06:06:02	LD222_(tall_wheat)	LD222_recurrent_parent_(tall)	Phosphorite	2021-03-17 15:47:51	93756.3	0.18928	0.00248	0	0.05869	0.93524	0.00359	0	124.602	127.754	132.233	0.00195	0.11617	0.78902	0.07897	0.0139	0	36.285	752.446	0.022	425.742	1.68968	40.315	0.55434	0	0	0.00845	0.32415	0.6674	0	-0.05911	0	0.00793	0.68822	0.29747	0.00638	0	-0.02401	0	0	0.69615	0.29459	0.00926	0
1	06:06:03	LD222_(tall_wheat)	LD222_recurrent_parent_(tall)	Phosphorite	2021-03-17 15:47:51	63974.1	0.19708	0	0.00145	0.03038	0.96268	0.00549	0	184.137	188.943	123.625	0	0.20891	0.72671	0.05208	0.01231	0	39.463	347.427	0.01	219.672	1.57331	104.776	0.50317	0	0	0.00907	0.41133	0.5796	0	-0.01064	0	0.00154	0.59885	0.38784	0.01176	0	-0.00974	0	0	0.60039	0.39809	0.00152	0
1	06:07:01	Chulpan_(rye)	S._cereale_Chulpan	KH2PO4	2021-03-17 15:47:51	20429.9	0.08922	0	0	0.18808	0.81192	0	0	138.062	130.518	156.854	0	0.07042	0.64142	0.21798	0.07019	0	22.475	147.976	0.004	53.857	2.61569	68.458	0.41987	0	0	0	0.73408	0.26592	0	-0.08059	0	0	0.7816	0.2184	0	0	-0.06643	0	0	0.7816	0.2184	0	0
1	06:07:02	Chulpan_(rye)	S._cereale_Chulpan	KH2PO4	2021-03-17 15:47:51	28733.2	0.18622	0	0	0.02395	0.96914	0.00691	0	102.99	85.666	133.505	0.00448	0.09506	0.84891	0.04197	0.00958	0	28.238	278.99	0.008	132.318	2.11341	59.701	0.53123	0	0	0	0.42304	0.57696	0	-0.07637	0	0.00253	0.73948	0.25799	0	0	-0.04317	0	0	0.74201	0.25799	0	0
1	06:07:03	Chulpan_(rye)	S._cereale_Chulpan	KH2PO4	2021-03-17 15:47:51	66423.1	0.20353	0.00083	0	0.05556	0.92459	0.01902	0	106.399	88.647	121.241	0	0.12718	0.7966	0.06717	0.00905	0	36.215	624.283	0.018	368.59	1.69252	72.784	0.4601	0.00043	0	0.02834	0.47062	0.5006	0	0.01075	0	0.00117	0.54169	0.4495	0.00764	0	-0.00369	0	0.00245	0.54084	0.45065	0.00606	0
1	06:08:01	LD222_Rht17_NIL	T._durum_LD222_Rht17_NIL	KH2PO4	2021-03-17 15:47:51	14517.1	0.15295	0	0	0.15031	0.84969	0	0	197.571	169.793	155.411	0	0.05176	0.6873	0.26094	0	0	10.964	73.478	0.002	11.809	5.25686	100.015	0.50976	0	0	0	0.46278	0.53722	0	-0.13836	0	0.01011	0.85906	0.13083	0	0	-0.11125	0	0.02475	0.84442	0.13083	0	0
1	06:08:02	LD222_Rht17_NIL	T._durum_LD222_Rht17_NIL	KH2PO4	2021-03-17 15:47:51	34674.8	0.08586	0	0	0.22926	0.77074	0	0	193.916	200.238	167.467	0.00265	0.08015	0.51934	0.34598	0.05188	0	17.977	178.814	0.005	58.409	3.23972	96.7	0.47065	0	0	0	0.54038	0.45962	0	-0.12706	0	0	0.81101	0.18899	0	0	-0.09778	0	0	0.81101	0.18899	0	0
1	06:08:03	LD222_Rht17_NIL	T._durum_LD222_Rht17_NIL	KH2PO4	2021-03-17 15:47:51	41453.9	0.20413	0	0	0.07222	0.9222	0.00558	0	183.46	186.712	141.76	0	0.0281	0.87357	0.08023	0.0181	0	16.015	225.956	0.007	57.744	3.62411	98.565	0.51371	0	0	0.00513	0.33895	0.65591	0	-0.1042	0	0	0.85573	0.14427	0	0	-0.07184	0	0	0.85573	0.14427	0	0
1	06:09:01	LD222_(tall_wheat)	LD222_recurrent_parent_(tall)	KH2PO4	2021-03-17 15:47:51	83650.5	0.18543	0	0	0.11644	0.87009	0.01347	0	137.445	147.477	144.716	0.00105	0.09326	0.70082	0.19934	0.00553	0	33.822	608.61	0.018	318.118	1.79651	52.941	0.54113	0	0	0.01143	0.31527	0.6733	0	-0.09269	0	0.00756	0.71195	0.28049	0	0	-0.07302	0	0.00224	0.71727	0.28049	0	0
1	06:09:02	LD222_(tall_wheat)	LD222_recurrent_parent_(tall)	KH2PO4	2021-03-17 15:47:51	138943	0.23965	0	0	0.01353	0.97884	0.00762	0	167.614	188.832	133.136	0.00055	0.04121	0.91528	0.04103	0.00192	0	33.739	828.947	0.024	446.914	1.80038	108.8	0.5865	0	0	0	0.18444	0.81556	0	-0.07337	0	0.0007	0.7249	0.2738	0.0006	0	-0.04432	0	0	0.7256	0.2744	0	0
1	06:09:03	LD222_(tall_wheat)	LD222_recurrent_parent_(tall)	KH2PO4	2021-03-17 15:47:51	98541.1	0.17957	0	0	0.05619	0.94024	0.00357	0	145.494	148.183	117.121	0.00062	0.22737	0.69542	0.05881	0.01778	0	42.434	677.287	0.02	446.343	1.48202	95.778	0.44122	0	0	0.0539	0.48547	0.46063	0	0.02708	0	0.00079	0.53253	0.45403	0.01265	0	0.01602	0	0	0.53332	0.46423	0.00245	0
2	06:01:01	Chulpan_(rye)	S._cereale_Chulpan	w/o_P	2021-03-17 15:56:21	11494.9	0.18456	0	0	0.14834	0.83047	0.02119	0	127.882	87.781	131.722	0	0.07279	0.76504	0.11198	0.05018	0	12.235	89.887	0.003	16.072	4.71802	64.981	0.51778	0	0	0	0.31601	0.68399	0	-0.04155	0	0	0.65829	0.34171	0	0	-0.03562	0	0	0.65829	0.34171	0	0
2	06:01:02	Chulpan_(rye)	S._cereale_Chulpan	w/o_P	2021-03-17 15:56:21	873.979	0.00352	0	0	0.53408	0.46592	0	0	123.016	0	207.138	0	0	0.15231	0.84769	0	0	6.487	7.105	0	0.789	8.84815	44.899	0.29535	0	0	0	1	0	0	-0.16337	0	0	1	0	0	0	-0.21452	0	0	1	0	0	0
2	06:01:03	Chulpan_(rye)	S._cereale_Chulpan	w/o_P	2021-03-17 15:56:21	1699.59	0.17515	0	0	0	1	0	0	88.247	0	137.151	0	0.185	0.78689	0.02812	0	0	11.571	19.259	0.001	3.21	4.98453	20.259	0.52503	0	0	0	0.40129	0.59871	0	-0.10128	0	0	0.75657	0.24343	0	0	-0.05433	0	0	0.75657	0.24343	0	0
2	06:02:01	LD222_Rht17_NIL	T._durum_LD222_Rht17_NIL	w/o_P	2021-03-17 15:56:21	6949.04	0.16916	0	0	0.07025	0.92123	0.00852	0	136.051	102.301	142.885	0	0.00851	0.82305	0.14673	0.02171	0	14.26	51.077	0.001	11.659	4.05923	54.663	0.57825	0	0	0	0.23067	0.76933	0	-0.07919	0	0	0.80749	0.19251	0	0	-0.04434	0	0	0.80749	0.19251	0	0
2	06:02:02	LD222_Rht17_NIL	T._durum_LD222_Rht17_NIL	w/o_P	2021-03-17 15:56:21	16297.7	0.11518	0	0	0.14897	0.85102	0	0	188.501	195.25	163.057	0	0.06413	0.63499	0.2748	0.02608	0	16.495	86.459	0.003	27.582	3.52155	70.669	0.47646	0	0	0	0.4484	0.5516	0	-0.14789	0	0	0.87065	0.12935	0	0	-0.11162	0	0	0.87065	0.12935	0	0
2	06:02:03	LD222_Rht17_NIL	T._durum_LD222_Rht17_NIL	w/o_P	2021-03-17 15:56:21	0	0	0	0	0	0	0	0	0	0	0	0	0	0	0	0	0	0	0	0	0	0	0	0	0	0	0	0	0	0	0	0	0	0	0	0	0	0	0	0	0	0	0	0
2	06:03:01	LD222_(tall_wheat)	LD222_recurrent_parent_(tall)	w/o_P	2021-03-17 15:56:21	66082.6	0.11133	0	0	0.20652	0.79132	0.00216	0	239.519	248.807	160.182	0	0.07285	0.62477	0.27831	0.02407	0	32.984	275.897	0.008	128.805	1.83678	153.753	0.49318	0	0	0.01153	0.41709	0.57138	0	-0.1199	0	0.00598	0.81243	0.1816	0	0	-0.09178	0	0	0.8184	0.1816	0	0
2	06:03:02	LD222_(tall_wheat)	LD222_recurrent_parent_(tall)	w/o_P	2021-03-17 15:56:21	57898.9	0.18007	0	0	0.02255	0.97745	0	0	202.125	209.657	143.797	0	0.05994	0.82271	0.11736	0	0	24.334	286.451	0.008	115.198	2.42666	115.312	0.54444	0	0	0.00128	0.3231	0.67563	0	-0.11587	0	0	0.78683	0.21189	0.00128	0	-0.07459	0	0	0.78683	0.21189	0.00128	0
2	06:03:03	LD222_(tall_wheat)	LD222_recurrent_parent_(tall)	w/o_P	2021-03-17 15:56:21	48630.9	0.04564	0	0	0.32994	0.67006	0	0	251.716	264.015	50.5362	0.00218	0.6671	0.17469	0.06423	0.09181	0	21.483	193.197	0.006	70.898	2.73028	142.203	0.21782	0	0	0.1335	0.7438	0.1227	0	0.11748	0	0	0.18019	0.81768	0.00214	0	0.14657	0	0.00547	0.17471	0.81645	0.00337	0
2	06:04:01	Chulpan_(rye)	S._cereale_Chulpan	Phosphorite	2021-03-17 15:56:21	5783.39	0.10608	0	0	0.22281	0.77719	0	0	90.029	94.535	121.087	0.01711	0.21886	0.6448	0.0665	0.05273	0	10.887	64.239	0.002	8.609	5.29326	57.492	0.468	0	0	0.00801	0.39496	0.59702	0	-0.016	0	0.01279	0.55083	0.43638	0	0	0.02054	0	0	0.56362	0.39332	0.04305	0
2	06:04:02	Chulpan_(rye)	S._cereale_Chulpan	Phosphorite	2021-03-17 15:56:21	15372.2	0.08428	0	0	0.17426	0.82574	0	0	118.887	105.025	176.632	0	0.01989	0.55972	0.39564	0.02475	0	14.337	129.301	0.004	30.389	4.03774	49.861	0.44387	0	0	0	0.71416	0.28584	0	-0.13814	0	0	0.93082	0.06918	0	0	-0.11989	0	0	0.93082	0.06918	0	0
2	06:04:03	Chulpan_(rye)	S._cereale_Chulpan	Phosphorite	2021-03-17 15:56:21	18505.3	0.06272	0	0	0.28228	0.71772	0	0	124.617	0	135.967	0	0.21807	0.53085	0.21129	0.0398	0	9.523	148.497	0.004	20.74	6.04313	62.382	0.2781	0	0	0.01486	0.98341	0.00173	0	-0.02483	0	0	0.60729	0.39271	0	0	-0.02702	0	0	0.60729	0.38762	0.00509	0
2	06:05:01	LD222_Rht17_NIL	T._durum_LD222_Rht17_NIL	Phosphorite	2021-03-17 15:56:21	6123.39	0.03001	0	0	0.47577	0.52423	0	0	103.332	0	206.469	0	0.054	0.2883	0.5401	0.1176	0	15.775	59.259	0.002	16.593	3.67782	59.006	0.40949	0	0	0	0.73824	0.26176	0	-0.18434	0	0.06058	0.80274	0.13668	0	0	-0.18283	0	0.01535	0.84797	0.13668	0	0
2	06:05:02	LD222_Rht17_NIL	T._durum_LD222_Rht17_NIL	Phosphorite	2021-03-17 15:56:21	25688.3	0.12711	0	0	0.0844	0.9156	0	0	204.697	213.447	167.314	0	0.01564	0.69441	0.28995	0	0	16.292	125.494	0.004	34.274	3.56427	107.363	0.50484	0	0	0	0.41411	0.58589	0	-0.17263	0	0	0.95996	0.04004	0	0	-0.13762	0	0.00772	0.95224	0.04004	0	0
2	06:05:03	LD222_Rht17_NIL	T._durum_LD222_Rht17_NIL	Phosphorite	2021-03-17 15:56:21	898.624	0.10249	0	0	0	1	0	0	207.547	0	82.8385	0	0.84824	0.15176	0	0	0	16.452	4.33	0	1.082	3.53041	172.697	0.34063	0	0	0	1	0	0	0.09474	0	0	0	1	0	0	0.08395	0	0	0	1	0	0
2	06:06:01	LD222_(tall_wheat)	LD222_recurrent_parent_(tall)	Phosphorite	2021-03-17 15:56:21	12659.7	0.11242	0	0	0.04164	0.95836	0	0	265.674	0	149.545	0	0.10145	0.70539	0.18726	0.00589	0	15.839	47.651	0.001	10.83	3.66332	179.549	0.42726	0	0	0.00963	0.70101	0.28936	0	-0.09258	0	0	0.78941	0.21059	0	0	-0.07843	0	0	0.78941	0.21059	0	0
2	06:06:02	LD222_(tall_wheat)	LD222_recurrent_parent_(tall)	Phosphorite	2021-03-17 15:56:21	92299.7	0.19955	0	0	0.05609	0.94213	0.00177	0	128.658	132.343	130.836	0.00053	0.12983	0.79395	0.06838	0.00731	0	35.674	717.404	0.021	407.655	1.7147	106.07	0.53403	0	0	0.00784	0.35008	0.64208	0	-0.05116	0	0.00332	0.67132	0.31325	0.01211	0	-0.01932	0	0.00365	0.671	0.3011	0.02426	0
2	06:06:03	LD222_(tall_wheat)	LD222_recurrent_parent_(tall)	Phosphorite	2021-03-17 15:56:21	99378.8	0.14962	0.00116	0.00077	0.1431	0.84093	0.01404	0	197.78	205.741	140.174	0.00272	0.10383	0.6975	0.14379	0.05216	0	29.326	502.471	0.015	242.92	2.04163	111.781	0.4031	0	0.00185	0.06069	0.51903	0.41842	0	-0.05042	0	0.00341	0.71754	0.26243	0.01661	0	-0.03893	0	0	0.72096	0.2659	0.0079	0.00524
2	06:07:01	Chulpan_(rye)	S._cereale_Chulpan	KH2PO4	2021-03-17 15:56:21	8578.25	0.19637	0	0	0.01904	0.98096	0	0	122.562	110.365	109.321	0	0.13416	0.86584	0	0	0	15.378	69.991	0.002	16.291	3.7705	70.646	0.51635	0	0	0	0.34622	0.65378	0	0.04727	0	0	0.30942	0.69058	0	0	0.02872	0	0	0.30942	0.69058	0	0
2	06:07:02	Chulpan_(rye)	S._cereale_Chulpan	KH2PO4	2021-03-17 15:56:21	38205.8	0.1829	0	0	0.07802	0.91265	0.00933	0	153.294	162.496	143.202	0	0.11289	0.71483	0.14549	0.02679	0	26.547	249.232	0.007	112.673	2.23732	90.922	0.54148	0	0	0.00903	0.38024	0.61074	0	-0.12506	0	0.00697	0.77111	0.22065	0.00127	0	-0.07203	0	0.01201	0.76607	0.2129	0.00903	0
2	06:07:03	Chulpan_(rye)	S._cereale_Chulpan	KH2PO4	2021-03-17 15:56:21	80005.9	0.19182	0	0	0.06753	0.92454	0.00793	0	113.084	130.568	105.448	0.00052	0.25999	0.70271	0.02911	0.00768	0	36.341	707.493	0.021	411.314	1.68746	78.905	0.44182	0	0	0.01251	0.52365	0.46384	0	0.07108	0	0	0.35574	0.64002	0.00425	0	0.0587	0	0	0.35574	0.63957	0.00469	0
2	06:08:01	LD222_Rht17_NIL	T._durum_LD222_Rht17_NIL	KH2PO4	2021-03-17 15:56:21	2676.35	0.12373	0	0	0.12306	0.87694	0	0	139.99	0	128.524	0	0.23839	0.63594	0.10416	0.02151	0	10.4	19.118	0.001	3.824	5.53829	66.459	0.42813	0	0	0	0.70479	0.29521	0	-0.03309	0	0	0.70865	0.29135	0	0	-0.0138	0	0	0.70865	0.29135	0	0
2	06:08:02	LD222_Rht17_NIL	T._durum_LD222_Rht17_NIL	KH2PO4	2021-03-17 15:56:21	29154.2	0.11869	0	0	0.14924	0.85076	0	0	193.378	204.879	140.935	0.00356	0.11382	0.65965	0.18643	0.03654	0	15.217	150.763	0.004	34.987	3.80923	154.659	0.43938	0	0	0	0.57781	0.42219	0	-0.06392	0	0	0.71238	0.28762	0	0	-0.04743	0	0	0.71238	0.28762	0	0
2	06:08:03	LD222_Rht17_NIL	T._durum_LD222_Rht17_NIL	KH2PO4	2021-03-17 15:56:21	34518.6	0.08171	0.01136	0	0.28686	0.69273	0.00905	0	196.705	199.89	145.914	0	0.25191	0.43221	0.23683	0.07905	0	16.35	175.484	0.005	49.032	3.55189	105.383	0.42605	0	0	0.05805	0.45609	0.48587	0	-0.09037	0.00742	0.0199	0.61666	0.34549	0.01053	0	-0.04615	0.00635	0.01784	0.6198	0.34549	0.01053	0
2	06:09:01	LD222_(tall_wheat)	LD222_recurrent_parent_(tall)	KH2PO4	2021-03-17 15:56:21	151726	0.17902	0	0.00207	0.11741	0.86121	0.01931	0	152.163	162.918	135.182	0.00055	0.12598	0.67482	0.17161	0.02704	0	31.863	997.134	0.029	415.65	1.89425	72.593	0.52391	0.00069	0.00061	0.01154	0.36315	0.62401	0	-0.06315	0.00101	0.02045	0.5985	0.37793	0.00211	0	-0.04631	0.00067	0.01737	0.60261	0.37793	0.00073	0.00068
2	06:09:02	LD222_(tall_wheat)	LD222_recurrent_parent_(tall)	KH2PO4	2021-03-17 15:56:21	98923.5	0.21154	0	0	0.01595	0.97496	0.00909	0	173.392	184.607	135.335	0	0.07718	0.86923	0.04803	0.00556	0	35.37	570.521	0.017	323.703	1.72748	98.797	0.57655	0	0	0	0.22886	0.77114	0	-0.07519	0.00088	0	0.7449	0.25084	0.00338	0	-0.04325	0	0	0.74578	0.25422	0	0
2	06:09:03	LD222_(tall_wheat)	LD222_recurrent_parent_(tall)	KH2PO4	2021-03-17 15:56:21	99893.7	0.15147	0	0.00048	0.11294	0.87742	0.00916	0	142.675	146.884	132.921	0.00091	0.14078	0.71637	0.11384	0.0281	0	37.526	700.147	0.02	427.96	1.64163	93.302	0.38765	0	0	0.0846	0.50644	0.40896	0	-0.02817	0.00166	0.0029	0.66844	0.32128	0.00571	0	-0.0269	0.00148	0.00384	0.66768	0.31895	0.00543	0.00262
1	01:01:01	Chulpan_(rye)	S._cereale_Chulpan	w/o_P	2021-03-17 17:44:14	79947.5	0.18969	0	0	0.0197	0.97961	0.00069	0	154.442	175.104	142.637	0	0.00233	0.91746	0.08021	0	0	19.004	517.655	0.013	163.509	3.07061	116.28	0.53778	0	0	0.00099	0.36613	0.63288	0	-0.10422	0	0	0.84677	0.15323	0	0	-0.0766	0	0.00182	0.84495	0.15323	0	0
1	01:01:02	Chulpan_(rye)	S._cereale_Chulpan	w/o_P	2021-03-17 17:44:14	57454.6	0.14759	0	0	0.00257	0.99743	0	0	159.75	184.75	148.082	0	0.00838	0.91509	0.07653	0	0	10.355	359.652	0.009	56.764	5.56202	97.786	0.43324	0	0	0	0.68944	0.31056	0	-0.0922	0	0	0.89223	0.10777	0	0	-0.08865	0	0	0.89223	0.10777	0	0
1	01:01:03	Chulpan_(rye)	S._cereale_Chulpan	w/o_P	2021-03-17 17:44:14	44239.7	0.22675	0	0	0	0.9985	0.0015	0	126.207	136.238	124.577	0	0.00886	0.98911	0.00203	0	0	12.652	350.532	0.009	55.882	4.56488	70.74	0.52259	0	0	0	0.40648	0.59352	0	-0.0166	0	0	0.59645	0.40205	0.0015	0	-0.01354	0	0	0.59645	0.40355	0	0
1	01:02:01	LD222_Rht17_NIL	T._durum_LD222_Rht17_NIL	w/o_P	2021-03-17 17:44:14	75305.3	0.12706	0	0.00251	0.08294	0.91455	0	0	171.194	196.972	165.539	0	0.00278	0.63823	0.35817	0.00082	0	14.352	439.883	0.011	95.071	4.03353	114.958	0.48185	0	0	0.00147	0.57394	0.42459	0	-0.16109	0	0.00351	0.90733	0.08916	0	0	-0.14659	0	0.00585	0.90499	0.08916	0	0
1	01:02:02	LD222_Rht17_NIL	T._durum_LD222_Rht17_NIL	w/o_P	2021-03-17 17:44:14	85794.7	0.12351	0	0	0.02715	0.97285	0	0	175.352	201.552	161.939	0	0.00189	0.76261	0.2336	0.00189	0	11.243	489.273	0.012	90.334	5.1281	127.425	0.44314	0	0	0.01469	0.54556	0.43975	0	-0.13601	0	0	0.93702	0.06298	0	0	-0.12655	0	0	0.93702	0.06298	0	0
1	01:02:03	LD222_Rht17_NIL	T._durum_LD222_Rht17_NIL	w/o_P	2021-03-17 17:44:14	55446	0.25712	0	0	0.00094	0.99566	0.0034	0	163.292	181.232	132.123	0	0.01661	0.97054	0.01285	0	0	15.747	339.551	0.008	82.969	3.68414	116.92	0.62703	0	0	0.00107	0.12681	0.87212	0	-0.07922	0	0.00078	0.78988	0.20934	0	0	-0.03503	0	0	0.79066	0.20827	0.00107	0
1	01:03:01	LD222_(tall_wheat)	LD222_recurrent_parent_(tall)	w/o_P	2021-03-17 17:44:14	85585.2	0.17942	0.00022	0	0.01399	0.98578	0	0	90.579	104.168	141.513	0	0.00727	0.9027	0.08981	0.00022	0	44.582	944.872	0.023	632.899	1.42461	62.827	0.48019	0	0	0.00272	0.49195	0.50534	0	-0.09504	0	0	0.78834	0.21166	0	0	-0.07151	0	0	0.78834	0.21166	0	0
1	01:03:02	LD222_(tall_wheat)	LD222_recurrent_parent_(tall)	w/o_P	2021-03-17 17:44:14	156061	0.17953	0	0.00063	0.04606	0.95331	0	0	217.576	236.159	151.678	0	0.00628	0.82926	0.16084	0.00362	0	21.865	717.271	0.018	253.345	2.68486	128.244	0.45172	0	0.00208	0.02539	0.51511	0.45742	0	-0.12543	0	0.0039	0.89513	0.1005	0.00047	0	-0.12103	0.00666	0.01898	0.87337	0.09828	0.00145	0.00127
1	01:03:03	LD222_(tall_wheat)	LD222_recurrent_parent_(tall)	w/o_P	2021-03-17 17:44:14	61709.9	0.1998	0	0	0.04949	0.94978	0.00072	0	139.576	147.131	139.478	0	0.02855	0.8209	0.1477	0.00285	0	42.721	442.123	0.011	295.614	1.47395	65.071	0.48763	0	0	0.01993	0.3788	0.60126	0	-0.04899	0	0	0.65283	0.34717	0	0	-0.05617	0	0.00144	0.65139	0.34717	0	0
1	01:04:01	Chulpan_(rye)	S._cereale_Chulpan	Phosphorite	2021-03-17 17:44:14	44031.3	0.18283	0	0	0.00437	0.99563	0	0	145.747	159.391	129.666	0	0.02292	0.94093	0.03615	0	0	10.806	302.107	0.007	45.576	5.33277	102.007	0.48851	0	0	0	0.56712	0.43288	0	-0.03615	0	0	0.71646	0.28354	0	0	-0.0274	0	0	0.71646	0.28354	0	0
1	01:04:02	Chulpan_(rye)	S._cereale_Chulpan	Phosphorite	2021-03-17 17:44:14	68836.8	0.13752	0	0	0.02597	0.97403	0	0	132.189	146.005	148.107	0	0.00862	0.87717	0.1137	0.00051	0	12.008	520.746	0.013	105.966	4.80551	91.64	0.4091	0	0	0.00796	0.74722	0.24483	0	-0.08681	0	0	0.90521	0.09479	0	0	-0.08335	0	0	0.90521	0.09426	0.00053	0
1	01:04:03	Chulpan_(rye)	S._cereale_Chulpan	Phosphorite	2021-03-17 17:44:14	111231	0.17526	0	0	0.03903	0.95799	0.00298	0	153.875	174.515	138.804	0	0.02802	0.87339	0.09656	0.00203	0	19.063	722.867	0.018	180.218	3.06148	100.934	0.46075	0	0	0.01008	0.53154	0.45838	0	-0.0612	0	0	0.76391	0.23489	0.0012	0	-0.05315	0	0.00058	0.76333	0.23568	0.00041	0
1	01:05:01	LD222_Rht17_NIL	T._durum_LD222_Rht17_NIL	Phosphorite	2021-03-17 17:44:14	21483.1	0.11974	0	0	0.09684	0.90316	0	0	171.08	176.308	162.409	0	0	0.78786	0.20829	0.00385	0	9.961	125.574	0.003	17.042	5.77956	69.384	0.44894	0	0	0.00391	0.6328	0.36328	0	-0.12202	0	0	0.92743	0.07257	0	0	-0.11336	0	0	0.92743	0.07257	0	0
1	01:05:02	LD222_Rht17_NIL	T._durum_LD222_Rht17_NIL	Phosphorite	2021-03-17 17:44:14	90278.9	0.11313	0	0	0.04902	0.95098	0	0	172.532	185.398	165.097	0	0.00216	0.76649	0.23135	0	0	17.247	523.259	0.013	133.004	3.37239	104.443	0.39683	0	0	0.00637	0.70656	0.28707	0	-0.13697	0	0	0.97014	0.02986	0	0	-0.13134	0	0	0.97014	0.02986	0	0
1	01:05:03	LD222_Rht17_NIL	T._durum_LD222_Rht17_NIL	Phosphorite	2021-03-17 17:44:14	68315.9	0.12037	0	0	0.06992	0.93008	0	0	189.72	208.809	164.06	0	0.00502	0.74444	0.2472	0.00334	0	10.467	360.087	0.009	53.189	5.50303	124.222	0.41572	0	0	0.02759	0.6033	0.36912	0	-0.14108	0	0	0.94486	0.05514	0	0	-0.12991	0	0.00202	0.94283	0.05514	0	0
1	01:06:01	LD222_(tall_wheat)	LD222_recurrent_parent_(tall)	Phosphorite	2021-03-17 17:44:14	88751	0.15393	0	0.00137	0.09554	0.9031	0	0	206.535	225.114	159.357	0	0.01049	0.73387	0.25447	0.00117	0	37.571	429.714	0.011	248.286	1.63998	159.356	0.5462	0	0	0.00704	0.26144	0.73152	0	-0.17737	0	0.02295	0.88193	0.09512	0	0	-0.14631	0.00083	0.0588	0.84525	0.09512	0	0
1	01:06:02	LD222_(tall_wheat)	LD222_recurrent_parent_(tall)	Phosphorite	2021-03-17 17:44:14	229754	0.2045	0	0.00297	0.0372	0.95924	0.00059	0	187.069	200.798	144.498	0.00039	0.01295	0.88908	0.09551	0.00206	0	29.545	1228.18	0.03	585.542	2.02782	117.882	0.54405	0.00031	0	0.01618	0.28436	0.69915	0	-0.11622	0	0.00914	0.79598	0.19488	0	0	-0.10356	0.00699	0.01756	0.7805	0.19494	0	0
1	01:06:03	LD222_(tall_wheat)	LD222_recurrent_parent_(tall)	Phosphorite	2021-03-17 17:44:14	27472.4	0.23294	0	0	0.00739	0.99261	0	0	142.018	141.764	122.064	0	0.00761	0.95615	0.03624	0	0	17.886	193.443	0.005	53.272	3.25558	60.231	0.50966	0	0	0	0.38828	0.61172	0	-0.00469	0	0	0.51347	0.48653	0	0	-0.00793	0	0	0.51347	0.48653	0	0
1	01:07:01	Chulpan_(rye)	S._cereale_Chulpan	KH2PO4	2021-03-17 17:44:14	32244.9	0.17651	0	0	0.02165	0.97835	0	0	87.701	97.46	142.133	0	0.00835	0.85521	0.13644	0	0	21.021	367.669	0.009	122.847	2.78751	50.784	0.45179	0	0	0	0.67362	0.32638	0	-0.06364	0	0	0.75003	0.24997	0	0	-0.06632	0	0	0.75003	0.24997	0	0
1	01:07:02	Chulpan_(rye)	S._cereale_Chulpan	KH2PO4	2021-03-17 17:44:14	52670.9	0.19338	0	0	0.00754	0.99246	0	0	117.719	129.839	130.923	0	0.01871	0.94035	0.04093	0	0	19.366	447.428	0.011	140.239	3.01542	84.266	0.44735	0	0	0.01156	0.64807	0.34037	0	-0.03265	0	0	0.69253	0.30747	0	0	-0.02991	0	0	0.69253	0.30565	0.00182	0
1	01:07:03	Chulpan_(rye)	S._cereale_Chulpan	KH2PO4	2021-03-17 17:44:14	88798.1	0.28561	0	0	0.0133	0.97722	0.00948	0	111.947	128.276	119.23	0.00036	0.01369	0.9643	0.0168	0.00484	0	31.737	793.217	0.02	395.8	1.90099	65.042	0.5802	0	0	0.00048	0.17388	0.82564	0	0.02548	0	0	0.41712	0.58288	0	0	0.00699	0	0	0.41712	0.58288	0	0
1	01:08:01	LD222_Rht17_NIL	T._durum_LD222_Rht17_NIL	KH2PO4	2021-03-17 17:44:14	59833.8	0.13739	0	0	0.04218	0.95782	0	0	173.873	186.061	156.267	0	0.02084	0.76144	0.21772	0	0	16.421	344.123	0.008	93.182	3.53701	126.927	0.47115	0	0	0.00255	0.53539	0.46207	0	-0.12154	0	0	0.83712	0.16288	0	0	-0.10685	0	0.00398	0.83314	0.16288	0	0
1	01:08:02	LD222_Rht17_NIL	T._durum_LD222_Rht17_NIL	KH2PO4	2021-03-17 17:44:14	51198.5	0.15909	0	0	0.01869	0.98131	0	0	172.272	178.142	153.436	0	0.00283	0.86412	0.13305	0	0	14.951	297.196	0.007	75.616	3.87559	126.169	0.50098	0	0	0	0.40087	0.59913	0	-0.12349	0	0	0.84997	0.15003	0	0	-0.10169	0	0	0.84997	0.15003	0	0
1	01:08:03	LD222_Rht17_NIL	T._durum_LD222_Rht17_NIL	KH2PO4	2021-03-17 17:44:14	43945.8	0.20289	0	0	0.02595	0.97405	0	0	169.682	153.47	133.79	0	0.01997	0.93954	0.03342	0.00708	0	11.225	258.99	0.006	35.24	5.13591	115.884	0.51506	0	0	0	0.37983	0.62017	0	-0.05955	0	0	0.77468	0.22532	0	0	-0.03542	0	0	0.77468	0.22532	0	0
1	01:09:01	LD222_(tall_wheat)	LD222_recurrent_parent_(tall)	KH2PO4	2021-03-17 17:44:14	147535	0.1722	0	0	0.05713	0.94287	0	0	145.354	161.978	152.961	0	0.00514	0.78895	0.20243	0.00347	0	36.334	1015.01	0.025	567.991	1.68774	87.845	0.50272	0	0	0.01604	0.44423	0.53973	0	-0.13869	0	0.00149	0.92557	0.07294	0	0	-0.11734	0.00071	0.00894	0.91741	0.07294	0	0
1	01:09:02	LD222_(tall_wheat)	LD222_recurrent_parent_(tall)	KH2PO4	2021-03-17 17:44:14	267704	0.20354	0	0.00089	0.07079	0.92832	0	0	220.893	248.923	137.608	0.00033	0.02008	0.85663	0.11564	0.00732	0	24.25	1211.91	0.03	450.922	2.43458	156.861	0.4492	0	0.00223	0.07368	0.36347	0.56062	0	-0.05579	0	0.0005	0.76771	0.23179	0	0	-0.06625	0.00341	0.01419	0.75049	0.23159	0.00014	0.00018
1	01:09:03	LD222_(tall_wheat)	LD222_recurrent_parent_(tall)	KH2PO4	2021-03-17 17:44:14	105331	0.25294	0	0	0.03769	0.95331	0.009	0	127.5	129.933	126.399	0	0.02177	0.92001	0.05776	0.00046	0	37.915	826.128	0.02	468.941	1.62732	50.099	0.54496	0	0	0.01156	0.25999	0.72845	0	-0.02551	0.00075	0.0096	0.58133	0.40418	0.00414	0	-0.02494	0	0.0241	0.56758	0.40241	0.00514	0.00077
2	01:01:01	Chulpan_(rye)	S._cereale_Chulpan	w/o_P	2021-03-17 17:58:18	107683	0.18476	0	0	0.01859	0.97925	0.00216	0	143.881	183.666	147.68	0	0.00785	0.83951	0.15187	0.00077	0	18.721	748.418	0.018	221.413	3.11536	107.018	0.49077	0	0	0.00204	0.45918	0.53878	0	-0.085	0	0	0.78997	0.20974	0.00029	0	-0.08956	0	0.00054	0.78942	0.21003	0	0
2	01:01:02	Chulpan_(rye)	S._cereale_Chulpan	w/o_P	2021-03-17 17:58:18	62718.8	0.15218	0	0	0.00848	0.99152	0	0	140.834	170.928	142.908	0	0.00868	0.87745	0.11387	0	0	11.603	445.338	0.011	85.726	4.9711	95.849	0.42539	0	0	0	0.73199	0.26801	0	-0.07646	0	0	0.87885	0.12115	0	0	-0.07106	0	0	0.87885	0.12115	0	0
2	01:01:03	Chulpan_(rye)	S._cereale_Chulpan	w/o_P	2021-03-17 17:58:18	12979.5	0.13792	0	0	0.02725	0.97275	0	0	105.88	110.116	133.784	0	0.05464	0.89982	0.03608	0.00946	0	10.3	122.587	0.003	16.38	5.59159	71.005	0.40164	0	0	0	0.96149	0.03851	0	-0.04138	0	0	0.73289	0.26711	0	0	-0.04149	0	0.00255	0.73034	0.26711	0	0
2	01:02:01	LD222_Rht17_NIL	T._durum_LD222_Rht17_NIL	w/o_P	2021-03-17 17:58:18	44806.6	0.12966	0	0	0.10263	0.89737	0	0	127.773	135.466	160.586	0	0.00191	0.6852	0.31289	0	0	12.136	350.673	0.009	58.621	4.75558	93.887	0.43834	0	0	0.00457	0.67748	0.31795	0	-0.12281	0	0	0.81873	0.18127	0	0	-0.12722	0	0.00399	0.81474	0.18127	0	0
2	01:02:02	LD222_Rht17_NIL	T._durum_LD222_Rht17_NIL	w/o_P	2021-03-17 17:58:18	68543.5	0.14213	0	0	0.04081	0.95919	0	0	178.127	202.838	159.105	0	0.00611	0.78475	0.20789	0.00124	0	13.204	384.801	0.009	86.49	4.37727	116.659	0.45097	0	0	0.00898	0.49646	0.49456	0	-0.13636	0	0	0.949	0.051	0	0	-0.12392	0	0	0.949	0.05011	0.00089	0
2	01:02:03	LD222_Rht17_NIL	T._durum_LD222_Rht17_NIL	w/o_P	2021-03-17 17:58:18	33055.7	0.151	0	0	0.00862	0.99138	0	0	167.733	189.987	154.879	0	0	0.85929	0.14071	0	0	16.387	197.074	0.005	47.373	3.54411	77.32	0.52271	0	0	0	0.37542	0.62458	0	-0.13405	0	0	0.97278	0.02722	0	0	-0.1013	0	0	0.97278	0.02722	0	0
2	01:03:01	LD222_(tall_wheat)	LD222_recurrent_parent_(tall)	w/o_P	2021-03-17 17:58:18	39346.2	0.17734	0	0	0.10166	0.89834	0	0	72.484	79.552	155.837	0.00057	0.00443	0.70116	0.29384	0	0	39.197	542.823	0.013	333.44	1.58227	59.78	0.52642	0	0	0.01234	0.33987	0.64779	0	-0.16487	0	0.02127	0.84768	0.13105	0	0	-0.14302	0	0.03405	0.8349	0.12938	0.00127	0.00039
2	01:03:02	LD222_(tall_wheat)	LD222_recurrent_parent_(tall)	w/o_P	2021-03-17 17:58:18	203172	0.16834	0.00034	0.00102	0.06232	0.93632	0	0	224.746	259.198	150.602	0	0.00201	0.89944	0.09679	0.00176	0	18.507	904.01	0.022	279.474	3.15013	145.229	0.46333	0.00264	0.00177	0.03063	0.38549	0.57946	0	-0.13469	0	0.00204	0.93816	0.05979	0	0	-0.13471	0.01147	0.02307	0.90564	0.05909	0.00036	0.00036
2	01:03:03	LD222_(tall_wheat)	LD222_recurrent_parent_(tall)	w/o_P	2021-03-17 17:58:18	110594	0.25701	0	0	0.00539	0.99386	0.00076	0	135.761	145.683	121.925	0	0.01372	0.97257	0.01224	0.00147	0	41.457	814.621	0.02	528.521	1.51041	80.606	0.54619	0	0	0.00081	0.28272	0.71646	0	-0.00064	0	0	0.55646	0.443	0.00054	0	-0.00136	0	0	0.55646	0.44354	0	0
2	01:04:01	Chulpan_(rye)	S._cereale_Chulpan	Phosphorite	2021-03-17 17:58:18	49199.6	0.12599	0	0	0.0376	0.9624	0	0	141.326	159.705	153.925	0	0.01806	0.7754	0.20512	0.00141	0	10.003	348.129	0.009	41.817	5.75549	84.541	0.39018	0	0	0	0.81652	0.18348	0	-0.10232	0	0	0.93584	0.06416	0	0	-0.10828	0	0.00061	0.93523	0.06416	0	0
2	01:04:02	Chulpan_(rye)	S._cereale_Chulpan	Phosphorite	2021-03-17 17:58:18	42761.3	0.13888	0	0	0.0018	0.9982	0	0	131.427	161.671	148.693	0	0	0.88402	0.11495	0.00103	0	9.002	325.362	0.008	39.206	6.38962	80.879	0.41848	0	0	0.00278	0.78867	0.20855	0	-0.08816	0	0	0.84944	0.15056	0	0	-0.08744	0	0	0.84944	0.15056	0	0
2	01:04:03	Chulpan_(rye)	S._cereale_Chulpan	Phosphorite	2021-03-17 17:58:18	59267.3	0.20195	0	0	0.02318	0.97682	0	0	154.72	170.959	140.584	0	0.00969	0.92933	0.06099	0	0	18.579	383.061	0.009	114.313	3.13821	102.056	0.54059	0	0	0	0.28736	0.71264	0	-0.08403	0	0	0.88275	0.11725	0	0	-0.0577	0	0	0.88275	0.11725	0	0
2	01:05:01	LD222_Rht17_NIL	T._durum_LD222_Rht17_NIL	Phosphorite	2021-03-17 17:58:18	65066.2	0.23374	0	0	0.0246	0.9754	0	0	146.222	158.857	135.61	0	0.01103	0.93738	0.04992	0.00167	0	11.726	444.983	0.011	77.93	4.91972	84.433	0.59757	0	0	0	0.17975	0.82025	0	-0.07166	0	0	0.81473	0.18527	0	0	-0.04216	0	0	0.81473	0.18527	0	0
2	01:05:02	LD222_Rht17_NIL	T._durum_LD222_Rht17_NIL	Phosphorite	2021-03-17 17:58:18	60754.1	0.16293	0	0	0.01631	0.98369	0	0	157.278	185.661	155.615	0	0.00615	0.85765	0.13619	0	0	14.656	386.284	0.01	90.89	3.95187	93.111	0.49997	0	0	0.00697	0.4987	0.49433	0	-0.14332	0	0	0.9541	0.0459	0	0	-0.10582	0	0	0.9541	0.04279	0.0031	0
2	01:05:03	LD222_Rht17_NIL	T._durum_LD222_Rht17_NIL	Phosphorite	2021-03-17 17:58:18	70583	0.21397	0	0	0.01673	0.98261	0.00066	0	170.755	209.612	137.557	0	0.04192	0.9195	0.03769	0.00089	0	12.362	413.358	0.01	74.339	4.67026	89.96	0.54055	0	0	0.0101	0.31663	0.67327	0	-0.08674	0	0	0.83127	0.1681	0.00064	0	-0.0493	0	0	0.83127	0.16568	0.00242	0.00064
2	01:06:01	LD222_(tall_wheat)	LD222_recurrent_parent_(tall)	Phosphorite	2021-03-17 17:58:18	126035	0.19758	0	0	0.0158	0.98183	0.00237	0	176.175	234.1	143.339	0	0.017	0.91758	0.0645	0.00092	0	31.273	715.399	0.018	347.234	1.92625	124.853	0.55857	0	0	0.00043	0.28925	0.71032	0	-0.10628	0	0	0.9008	0.0992	0	0	-0.06659	0	0	0.9008	0.0992	0	0
2	01:06:02	LD222_(tall_wheat)	LD222_recurrent_parent_(tall)	Phosphorite	2021-03-17 17:58:18	158084	0.19921	0	0.00047	0.02835	0.97118	0	0	170.464	182.2	144.595	0.00063	0.01274	0.88574	0.09917	0.00172	0	31.358	927.373	0.023	465.271	1.92154	104.242	0.46214	0	0	0.02017	0.45564	0.52418	0	-0.09959	0	0.00118	0.85198	0.14684	0	0	-0.08736	0.003	0.00426	0.84589	0.14684	0	0
2	01:06:03	LD222_(tall_wheat)	LD222_recurrent_parent_(tall)	Phosphorite	2021-03-17 17:58:18	59982.2	0.12088	0	0.0021	0.09198	0.90592	0	0	179.694	183.535	153.194	0	0.01989	0.79552	0.16863	0.01596	0	22.477	333.802	0.008	127.474	2.61548	100.787	0.36282	0	0	0.05152	0.67178	0.2767	0	-0.08748	0	0	0.89343	0.10657	0	0	-0.09547	0.00108	0.00984	0.88252	0.10657	0	0
2	01:07:01	Chulpan_(rye)	S._cereale_Chulpan	KH2PO4	2021-03-17 17:58:18	51321	0.17734	0	0	0.01618	0.98382	0	0	97.63	111.513	138.76	0	0.00813	0.91669	0.07518	0	0	17.135	525.666	0.013	142.728	3.39369	60.97	0.47821	0	0	0.00273	0.5351	0.46217	0	-0.07203	0	0	0.76913	0.23039	0.00047	0	-0.05731	0	0	0.76913	0.22903	0.00071	0.00112
2	01:07:02	Chulpan_(rye)	S._cereale_Chulpan	KH2PO4	2021-03-17 17:58:18	48026.9	0.1641	0	0	0	1	0	0	112.725	123.485	139.946	0	0.01361	0.97084	0.01555	0	0	16.378	426.054	0.011	114.462	3.54598	84.225	0.46431	0	0	0	0.6259	0.3741	0	-0.07007	0	0	0.87786	0.12214	0	0	-0.05895	0	0	0.87786	0.12214	0	0
2	01:07:03	Chulpan_(rye)	S._cereale_Chulpan	KH2PO4	2021-03-17 17:58:18	68034.1	0.20151	0	0	0.07139	0.92282	0.00579	0	118.325	136.73	132.708	0	0.02819	0.82463	0.13857	0.0086	0	36.801	574.977	0.014	343.022	1.66929	68.78	0.44139	0	0.00083	0.034	0.43194	0.53323	0	-0.00831	0.00149	0	0.57345	0.4191	0.00597	0	-0.02656	0	0.00196	0.57298	0.41952	0.00407	0.00147
2	01:08:01	LD222_Rht17_NIL	T._durum_LD222_Rht17_NIL	KH2PO4	2021-03-17 17:58:18	58628.7	0.18649	0	0	0.01506	0.98494	0	0	163.521	174.641	144.671	0	0.01437	0.91065	0.07498	0	0	14.554	358.54	0.009	76.093	3.97883	117.165	0.52796	0	0	0	0.35337	0.64663	0	-0.09909	0	0	0.83915	0.16085	0	0	-0.07783	0	0	0.83915	0.16085	0	0
2	01:08:02	LD222_Rht17_NIL	T._durum_LD222_Rht17_NIL	KH2PO4	2021-03-17 17:58:18	85499	0.2414	0	0	0.00209	0.99791	0	0	159.352	193.663	130.608	0	0.02533	0.95698	0.01768	0	0	17.356	536.542	0.013	158.353	3.35191	109.279	0.54739	0	0	0	0.32907	0.67093	0	-0.04847	0	0	0.79376	0.20624	0	0	-0.03451	0	0	0.79376	0.20624	0	0
2	01:08:03	LD222_Rht17_NIL	T._durum_LD222_Rht17_NIL	KH2PO4	2021-03-17 17:58:18	48430.9	0.1776	0	0	0.02105	0.97895	0	0	155.055	123.928	132.255	0.00444	0.04327	0.90313	0.04917	0	0	12.83	312.347	0.008	49.221	4.50256	98.537	0.47406	0	0	0.02027	0.45523	0.5245	0	-0.0473	0	0	0.73543	0.26457	0	0	-0.03843	0	0.00237	0.73306	0.26457	0	0
2	01:09:01	LD222_(tall_wheat)	LD222_recurrent_parent_(tall)	KH2PO4	2021-03-17 17:58:18	125010	0.19006	0	0.00054	0.09612	0.90303	0.00031	0	164.706	182.03	151.524	0	0.00879	0.78081	0.2104	0	0	30.116	758.992	0.019	372.489	1.99288	95.829	0.54184	0	0.00204	0.00899	0.29515	0.69382	0	-0.13536	0	0.03137	0.74268	0.22595	0	0	-0.12286	0.00146	0.06293	0.70966	0.2249	0	0.00105
2	01:09:02	LD222_(tall_wheat)	LD222_recurrent_parent_(tall)	KH2PO4	2021-03-17 17:58:18	184927	0.1822	0.00068	0.00109	0.08859	0.90964	0	0	195.021	225.847	144.736	0.00068	0.01625	0.82052	0.15728	0.00527	0	23.6	948.239	0.023	370.72	2.4976	134.994	0.41745	0.002	0.00073	0.07555	0.4833	0.43842	0	-0.07794	0.00059	0.00343	0.81462	0.18136	0	0	-0.08684	0.00464	0.0165	0.7975	0.17986	0.0015	0
2	01:09:03	LD222_(tall_wheat)	LD222_recurrent_parent_(tall)	KH2PO4	2021-03-17 17:58:18	119922	0.23189	0	0.0008	0.03039	0.96509	0.00372	0	156.456	157.696	121.585	0.00036	0.03708	0.91376	0.04257	0.00623	0	34.957	766.493	0.019	405.96	1.74523	93.234	0.44313	0.00136	0.00398	0.04837	0.49753	0.44876	0	0.00665	0	0.00182	0.49171	0.50611	0.00036	0	-0.00509	0.00227	0.00893	0.48274	0.49976	0.00529	0.00101
1	02:01:01	Chulpan_(rye)	S._cereale_Chulpan	w/o_P	2021-03-17 18:17:37	52646.8	0.19477	0	0	0.01906	0.98094	0	0	126.998	153.984	126.574	0	0.04342	0.88344	0.07314	0	0	10.788	414.549	0.01	66.002	5.34158	98.66	0.47548	0	0	0	0.55179	0.44821	0	-0.00763	0	0	0.53898	0.46102	0	0	-0.01821	0	0	0.53898	0.46102	0	0
1	02:01:02	Chulpan_(rye)	S._cereale_Chulpan	w/o_P	2021-03-17 18:17:37	36670.7	0.09787	0	0	0.06285	0.93715	0	0	164.508	192.587	159.229	0	0.01015	0.75593	0.23122	0.0027	0	7.257	222.911	0.005	17.833	7.91399	103.012	0.3246	0	0	0.00516	0.90301	0.09183	0	-0.09788	0	0	0.89799	0.10201	0	0	-0.11168	0	0	0.89799	0.10201	0	0
1	02:01:03	Chulpan_(rye)	S._cereale_Chulpan	w/o_P	2021-03-17 18:17:37	17790.8	0.22288	0	0	0.0055	0.99281	0.0017	0	84.708	88.859	123.557	0	0.04997	0.93474	0.01529	0	0	13.319	210.026	0.005	43.537	4.34023	46.752	0.47705	0	0	0.00887	0.49493	0.4962	0	-0.00087	0	0	0.57024	0.42976	0	0	-0.01384	0.00633	0	0.56391	0.42976	0	0
1	02:02:01	LD222_Rht17_NIL	T._durum_LD222_Rht17_NIL	w/o_P	2021-03-17 18:17:37	21121.2	0.12105	0	0	0.05979	0.94021	0	0	145.566	108.164	151.412	0	0.01059	0.74388	0.24553	0	0	9.776	145.097	0.004	20.183	5.88825	118.442	0.40481	0	0	0	0.87649	0.12351	0	-0.09149	0	0	0.76106	0.23894	0	0	-0.09877	0	0	0.76106	0.23894	0	0
1	02:02:02	LD222_Rht17_NIL	T._durum_LD222_Rht17_NIL	w/o_P	2021-03-17 18:17:37	95314.4	0.15179	0	0	0.04173	0.95827	0	0	170.729	187.289	157.177	0	0.00317	0.86025	0.13499	0.00159	0	19.876	558.28	0.014	181.222	2.94095	103.772	0.4596	0	0	0.00677	0.50443	0.4888	0	-0.13487	0	0	0.94638	0.05362	0	0	-0.11086	0	0	0.94638	0.05318	0.00043	0
1	02:02:03	LD222_Rht17_NIL	T._durum_LD222_Rht17_NIL	w/o_P	2021-03-17 18:17:37	44377.8	0.23123	0	0	0	1	0	0	169.481	183.09	137.667	0	0.01213	0.97042	0.01745	0	0	12.225	261.846	0.006	44.413	4.7217	112.981	0.60333	0	0	0	0.18181	0.81819	0	-0.10443	0	0	0.89234	0.10766	0	0	-0.05557	0	0	0.89234	0.10766	0	0
1	02:03:01	LD222_(tall_wheat)	LD222_recurrent_parent_(tall)	w/o_P	2021-03-17 18:17:37	133217	0.1838	0	0	0.02507	0.97493	0	0	209.451	246.154	146.305	0	0.00816	0.87805	0.11379	0	0	25.561	636.027	0.016	223.863	2.31751	130.943	0.54311	0	0	0.00048	0.33936	0.66016	0	-0.11741	0	0	0.86716	0.13284	0	0	-0.07593	0	0.00049	0.86667	0.13284	0	0
1	02:03:02	LD222_(tall_wheat)	LD222_recurrent_parent_(tall)	w/o_P	2021-03-17 18:17:37	155301	0.14875	0	0	0.03912	0.96088	0	0	210.578	227.171	153.264	0	0.00319	0.87926	0.11613	0.00141	0	20.86	737.498	0.018	247.398	2.80804	138.739	0.42227	0	0	0.01939	0.61448	0.36613	0	-0.11292	0	0	0.96062	0.03938	0	0	-0.10293	0	0.00161	0.95901	0.03938	0	0
1	02:03:03	LD222_(tall_wheat)	LD222_recurrent_parent_(tall)	w/o_P	2021-03-17 18:17:37	109442	0.26741	0	0	0.00949	0.98185	0.00865	0	220.668	235.492	131.112	0	0.00757	0.97912	0.01216	0.00116	0	20.791	495.958	0.012	164.541	2.81701	122.541	0.60312	0	0	0.00212	0.15844	0.83944	0	-0.05962	0	0	0.74926	0.24862	0.00212	0	-0.03302	0	0.00058	0.74868	0.25074	0	0
1	02:04:01	Chulpan_(rye)	S._cereale_Chulpan	Phosphorite	2021-03-17 18:17:37	60742.3	0.1323	0	0	0.0329	0.9671	0	0	129.732	145.932	152.686	0	0.00773	0.79077	0.19924	0.00226	0	11.52	468.215	0.012	91.139	5.00606	94.25	0.43608	0	0	0.00283	0.71546	0.2817	0	-0.10316	0	0	0.84284	0.15716	0	0	-0.10152	0	0.00113	0.84171	0.15716	0	0
1	02:04:02	Chulpan_(rye)	S._cereale_Chulpan	Phosphorite	2021-03-17 18:17:37	106555	0.19897	0	0	0.0152	0.9848	0	0	117.993	141.079	140.137	0	0.00745	0.92099	0.07156	0	0	22.74	903.062	0.022	337.038	2.58677	79.267	0.48773	0	0.00101	0.00483	0.42732	0.56685	0	-0.07275	0	0	0.83627	0.16373	0	0	-0.05654	0	0	0.83627	0.16249	0.00023	0.00101
1	02:04:03	Chulpan_(rye)	S._cereale_Chulpan	Phosphorite	2021-03-17 18:17:37	24550.8	0.16382	0	0	0.00377	0.99623	0	0	141.713	146.131	132.987	0	0.06055	0.89535	0.0441	0	0	9.688	173.243	0.004	17.055	5.94086	74.309	0.4262	0	0	0.00742	0.67082	0.32176	0	-0.03675	0	0	0.73911	0.26089	0	0	-0.02821	0	0	0.73911	0.26089	0	0
1	02:05:01	LD222_Rht17_NIL	T._durum_LD222_Rht17_NIL	Phosphorite	2021-03-17 18:17:37	85860.8	0.16772	0	0	0.04765	0.95235	0	0	185.876	201.988	148.887	0	0.00897	0.82571	0.16418	0.00114	0	10.646	461.926	0.011	74.597	5.41192	128.401	0.52185	0	0	0	0.35946	0.64054	0	-0.107	0	0	0.87782	0.12218	0	0	-0.08713	0	0	0.87782	0.12218	0	0
1	02:05:02	LD222_Rht17_NIL	T._durum_LD222_Rht17_NIL	Phosphorite	2021-03-17 18:17:37	97936.4	0.12545	0	0	0.03231	0.96769	0	0	183.456	199.01	162.471	0	0.00155	0.82617	0.17228	0	0	17.376	533.842	0.013	146.189	3.34803	97.971	0.41339	0	0	0.01012	0.62694	0.36294	0	-0.1411	0	0	0.97542	0.02458	0	0	-0.12715	0	0.00124	0.97418	0.02458	0	0
1	02:05:03	LD222_Rht17_NIL	T._durum_LD222_Rht17_NIL	Phosphorite	2021-03-17 18:17:37	54128.4	0.21759	0	0	0.0082	0.9918	0	0	170.537	194.121	137.057	0	0.02407	0.95036	0.02557	0	0	10.998	317.4	0.008	42.32	5.24062	116.519	0.57044	0	0	0	0.24265	0.75735	0	-0.09054	0	0	0.81799	0.18201	0	0	-0.04883	0	0	0.81799	0.18201	0	0
1	02:06:01	LD222_(tall_wheat)	LD222_recurrent_parent_(tall)	Phosphorite	2021-03-17 18:17:37	246992	0.13231	0.0003	0	0.05105	0.94864	0	0	218.904	267.636	163.543	0	0.00763	0.74313	0.24713	0.00212	0	19.227	1128.31	0.028	320.443	3.03625	139.532	0.47093	0	0	0.00431	0.48021	0.51549	0	-0.15578	0.0003	0	0.92131	0.07838	0	0	-0.13532	0.0003	0.00075	0.92056	0.07838	0	0
1	02:06:02	LD222_(tall_wheat)	LD222_recurrent_parent_(tall)	Phosphorite	2021-03-17 18:17:37	54617.8	0.22878	0	0	0.0132	0.9868	0	0	112.544	115.13	132.692	0	0.03391	0.89779	0.06784	0.00046	0	43.93	485.299	0.012	334.779	1.44133	67.349	0.50345	0	0	0.00204	0.36342	0.63454	0	-0.0311	0	0	0.61174	0.38826	0	0	-0.03765	0	0.00164	0.6101	0.38826	0	0
1	02:06:03	LD222_(tall_wheat)	LD222_recurrent_parent_(tall)	Phosphorite	2021-03-17 18:17:37	103931	0.2241	0	0	0.0332	0.96641	0.0004	0	156.453	167.185	128.934	0	0.02261	0.92029	0.05496	0.00213	0	36.252	664.292	0.016	386.422	1.69103	78.028	0.53277	0	0	0.00323	0.34046	0.65631	0	-0.03841	0	0	0.64404	0.35596	0	0	-0.02602	0	0.00029	0.64376	0.35596	0	0
1	02:07:01	Chulpan_(rye)	S._cereale_Chulpan	KH2PO4	2021-03-17 18:17:37	47508.9	0.15513	0	0	0.0216	0.9784	0	0	122.276	143.92	145.648	0	0.00274	0.90215	0.09511	0	0	17.261	388.537	0.01	101.445	3.36974	78.85	0.45717	0	0	0	0.56907	0.43093	0	-0.08788	0	0	0.92641	0.07359	0	0	-0.07474	0	0	0.92641	0.07359	0	0
1	02:07:02	Chulpan_(rye)	S._cereale_Chulpan	KH2PO4	2021-03-17 18:17:37	87084.5	0.18539	0	0	0.01468	0.98532	0	0	113.595	161.424	140.419	0	0.00437	0.9328	0.06221	0.00062	0	23.682	766.623	0.019	247.321	2.48951	75.47	0.47168	0	0	0.01854	0.46221	0.51925	0	-0.07557	0	0	0.89869	0.10131	0	0	-0.0606	0.00067	0.0005	0.89753	0.10131	0	0
1	02:07:03	Chulpan_(rye)	S._cereale_Chulpan	KH2PO4	2021-03-17 18:17:37	86311.8	0.22387	0	0.00057	0.03745	0.95383	0.00815	0	121.27	148.58	129.01	0.00096	0.01856	0.89459	0.07997	0.00592	0	36.898	711.731	0.018	398.287	1.66552	97.792	0.47895	0	0	0.03287	0.41175	0.55537	0	-0.01048	0	0	0.56998	0.42707	0.00295	0	-0.02533	0	0	0.56998	0.42825	0.00177	0
1	02:08:01	LD222_Rht17_NIL	T._durum_LD222_Rht17_NIL	KH2PO4	2021-03-17 18:17:37	89532.4	0.1599	0	0	0.03765	0.96235	0	0	180.998	200.003	149.901	0	0.00493	0.84307	0.152	0	0	9.767	494.659	0.012	60.381	5.89319	140.318	0.50345	0	0	0	0.41576	0.58424	0	-0.10424	0	0.00115	0.90034	0.09851	0	0	-0.08366	0	0	0.90149	0.09851	0	0
1	02:08:02	LD222_Rht17_NIL	T._durum_LD222_Rht17_NIL	KH2PO4	2021-03-17 18:17:37	93543.8	0.16054	0	0	0.02637	0.97363	0	0	169.423	195.63	152.459	0	0.0091	0.82584	0.16507	0	0	12.954	552.13	0.014	115.111	4.46011	120.603	0.474	0	0	0.00609	0.54082	0.45309	0	-0.12174	0	0	0.89311	0.10689	0	0	-0.10415	0	0	0.89311	0.10689	0	0
1	02:08:03	LD222_Rht17_NIL	T._durum_LD222_Rht17_NIL	KH2PO4	2021-03-17 18:17:37	79121.4	0.26202	0	0	0.02919	0.96491	0.00591	0	167.534	198.746	134.608	0	0.00616	0.92551	0.06525	0.00308	0	20.155	472.269	0.012	145.163	2.90201	102.204	0.57396	0	0	0.01111	0.19685	0.79204	0	-0.0678	0	0	0.78245	0.21705	0.00051	0	-0.04237	0	0	0.78245	0.21755	0	0
1	02:09:01	LD222_(tall_wheat)	LD222_recurrent_parent_(tall)	KH2PO4	2021-03-17 18:17:37	147948	0.17126	0	0.0044	0.04917	0.94643	0	0	163.529	165.842	146.77	0	0.00784	0.85946	0.12839	0.00431	0	37.66	904.718	0.022	534.041	1.63668	85.082	0.49348	0	0	0.01059	0.44151	0.5479	0	-0.11484	0	0.00731	0.8832	0.10948	0	0	-0.09721	0.00409	0.01279	0.87363	0.10948	0	0
1	02:09:02	LD222_(tall_wheat)	LD222_recurrent_parent_(tall)	KH2PO4	2021-03-17 18:17:37	194988	0.2103	0	0.00026	0.02233	0.97741	0	0	191.942	213.605	140.594	0	0.00946	0.93045	0.05779	0.0023	0	27.388	1015.87	0.025	437.653	2.17368	114.32	0.50015	0	0	0.02046	0.32713	0.65241	0	-0.0896	0	0.00084	0.87793	0.12123	0	0	-0.06821	0.00074	0.00248	0.87555	0.12123	0	0
1	02:09:03	LD222_(tall_wheat)	LD222_recurrent_parent_(tall)	KH2PO4	2021-03-17 18:17:37	97070	0.21891	0	0	0.02613	0.97273	0.00114	0	133.152	135.353	133.475	0	0.0118	0.89285	0.09353	0.00182	0	50.318	729.016	0.018	555.492	1.29935	101.196	0.53169	0	0	0.01496	0.31174	0.6733	0	-0.0524	0	0	0.70991	0.29009	0	0	-0.04292	0	0	0.70991	0.29009	0	0
1	02:01:01	Chulpan_(rye)	S._cereale_Chulpan	w/o_P	2021-03-17 18:26:23	47875.4	0.20289	0	0	0.01872	0.98128	0	0	128.98	155.416	126.455	0	0.03452	0.91183	0.05365	0	0	10.37	371.185	0.009	58.234	5.5543	100.03	0.48464	0	0	0	0.47973	0.52027	0	-0.0088	0	0	0.54366	0.45634	0	0	-0.01956	0	0	0.54366	0.45634	0	0
1	02:01:02	Chulpan_(rye)	S._cereale_Chulpan	w/o_P	2021-03-17 18:26:23	34931.5	0.09956	0	0	0.06085	0.93915	0	0	170.133	196.996	164.307	0	0.00438	0.74289	0.25273	0	0	7.576	205.319	0.005	21.819	7.58206	106.081	0.32292	0	0	0	0.89716	0.10284	0	-0.11461	0	0	0.9705	0.0295	0	0	-0.13394	0	0	0.9705	0.0295	0	0
1	02:01:03	Chulpan_(rye)	S._cereale_Chulpan	w/o_P	2021-03-17 18:26:23	19336.6	0.2214	0	0	0.00969	0.99031	0	0	85.443	90.51	123.649	0	0.04813	0.92278	0.02909	0	0	13.103	226.31	0.006	45.347	4.41036	48.282	0.48895	0	0	0	0.48737	0.51263	0	0.0039	0	0.00349	0.49968	0.49683	0	0	-0.0047	0	0.00187	0.5013	0.49683	0	0
1	02:02:01	LD222_Rht17_NIL	T._durum_LD222_Rht17_NIL	w/o_P	2021-03-17 18:26:23	16695.7	0.11404	0	0	0.07492	0.92508	0	0	120.744	110.985	157.403	0	0.02041	0.6584	0.32119	0	0	9.153	138.273	0.003	20.249	6.28456	94.169	0.42969	0	0	0	0.77158	0.22842	0	-0.10612	0	0	0.81244	0.18756	0	0	-0.10557	0	0	0.81244	0.18756	0	0
1	02:02:02	LD222_Rht17_NIL	T._durum_LD222_Rht17_NIL	w/o_P	2021-03-17 18:26:23	88580.6	0.15077	0	0	0.03801	0.95959	0.0024	0	170.371	187.56	158.206	0	0.00115	0.84823	0.1493	0.00132	0	18.775	519.928	0.013	163.714	3.10663	108.763	0.45919	0.00096	0	0.00734	0.47829	0.51341	0	-0.1363	0	0	0.95972	0.03889	0.00139	0	-0.11202	0	0	0.96068	0.03847	0.00042	0.00043
1	02:02:03	LD222_Rht17_NIL	T._durum_LD222_Rht17_NIL	w/o_P	2021-03-17 18:26:23	43678.9	0.23418	0	0	0.0024	0.99547	0.00212	0	172.158	180.539	134.05	0	0.01764	0.97034	0.01201	0	0	11.74	253.714	0.006	40.748	4.91376	117.046	0.60049	0	0	0	0.18231	0.81769	0	-0.08598	0	0	0.82898	0.17102	0	0	-0.04217	0	0	0.82898	0.17017	0.00086	0
1	02:03:01	LD222_(tall_wheat)	LD222_recurrent_parent_(tall)	w/o_P	2021-03-17 18:26:23	112405	0.17329	0	0	0.0213	0.9787	0	0	206.322	246.888	149.007	0	0.01347	0.86348	0.12305	0	0	23.418	544.804	0.013	198.296	2.51588	127.318	0.53248	0	0	0.00168	0.34316	0.65516	0	-0.12308	0	0	0.87106	0.12894	0	0	-0.08216	0	0	0.87106	0.12894	0	0
1	02:03:02	LD222_(tall_wheat)	LD222_recurrent_parent_(tall)	w/o_P	2021-03-17 18:26:23	135550	0.15419	0	0	0.03486	0.96514	0	0	213.423	237.373	154.11	0	0.00559	0.87492	0.1165	0.00299	0	20.444	635.126	0.016	216.702	2.86269	129.652	0.4174	0	0.00251	0.01389	0.6011	0.3825	0	-0.11896	0	0	0.96283	0.03717	0	0	-0.1131	0.00176	0.00302	0.95805	0.03717	0	0
1	02:03:03	LD222_(tall_wheat)	LD222_recurrent_parent_(tall)	w/o_P	2021-03-17 18:26:23	105862	0.26583	0	0	0.01343	0.98309	0.00349	0	218.328	235.513	132.967	0	0.01014	0.96313	0.02619	0.00054	0	20.069	484.876	0.012	154.569	2.91394	116.195	0.607	0	0	0	0.15413	0.84587	0	-0.06683	0	0	0.77525	0.22379	0.00096	0	-0.03621	0	0	0.77525	0.22475	0	0
1	02:04:01	Chulpan_(rye)	S._cereale_Chulpan	Phosphorite	2021-03-17 18:26:23	56224.1	0.13542	0	0	0.03728	0.96272	0	0	124.046	146.3	152.812	0	0.00986	0.77982	0.20744	0.00287	0	11.46	453.253	0.011	82.997	5.03197	86.57	0.43619	0	0	0.0032	0.67959	0.31721	0	-0.10168	0	0	0.84674	0.15326	0	0	-0.0985	0	0	0.84674	0.15326	0	0
1	02:04:02	Chulpan_(rye)	S._cereale_Chulpan	Phosphorite	2021-03-17 18:26:23	96274.4	0.22371	0	0	0.00938	0.99062	0	0	119.799	141.751	136.701	0	0.00554	0.96064	0.03351	0.00031	0	23.457	803.635	0.02	318.552	2.51196	81.975	0.50938	0	0	0.0106	0.33734	0.65206	0	-0.07443	0	0.00029	0.83659	0.16311	0	0	-0.0549	0	0.00121	0.83568	0.16209	0.00102	0
1	02:04:03	Chulpan_(rye)	S._cereale_Chulpan	Phosphorite	2021-03-17 18:26:23	23371.4	0.18486	0	0	0.01266	0.98565	0.00169	0	139.084	147.218	130.891	0	0.02357	0.95299	0.02159	0.00185	0	10.645	168.038	0.004	17.034	5.41249	74.819	0.43341	0	0	0.00399	0.66032	0.33569	0	-0.03421	0	0	0.75938	0.24062	0	0	-0.02585	0	0	0.75938	0.24062	0	0
1	02:05:01	LD222_Rht17_NIL	T._durum_LD222_Rht17_NIL	Phosphorite	2021-03-17 18:26:23	90310.2	0.18676	0	0	0.03625	0.96375	0	0	180.798	205.132	144.093	0	0.01378	0.8406	0.14562	0	0	11.451	499.51	0.012	79.217	5.0362	127.631	0.53192	0	0	0	0.34248	0.65752	0	-0.09511	0	0	0.85704	0.14296	0	0	-0.07463	0	0	0.85704	0.14296	0	0
1	02:05:02	LD222_Rht17_NIL	T._durum_LD222_Rht17_NIL	Phosphorite	2021-03-17 18:26:23	92780.2	0.1221	0	0	0.03853	0.96147	0	0	179.316	198.322	162.442	0.00048	0.0021	0.81678	0.17834	0.00231	0	17.139	517.41	0.013	151.272	3.39306	100.459	0.39518	0	0	0.01641	0.62961	0.35398	0	-0.13727	0	0	0.97676	0.02324	0	0	-0.12622	0	0	0.97676	0.02324	0	0
1	02:05:03	LD222_Rht17_NIL	T._durum_LD222_Rht17_NIL	Phosphorite	2021-03-17 18:26:23	54376.1	0.22175	0	0	0.0029	0.9971	0	0	167.056	164.438	135.354	0	0.01644	0.97017	0.01164	0.00176	0	10.486	325.496	0.008	43.57	5.49349	108.726	0.57361	0	0	0.00447	0.22211	0.77342	0	-0.08272	0	0	0.81045	0.18955	0	0	-0.04327	0	0	0.81045	0.18612	0.00344	0
1	02:06:01	LD222_(tall_wheat)	LD222_recurrent_parent_(tall)	Phosphorite	2021-03-17 18:26:23	193409	0.13178	0	0.00209	0.06628	0.93163	0	0	221.81	258.552	164.033	0	0.00558	0.75159	0.23858	0.00426	0	20.545	871.959	0.022	291.573	2.84917	140.105	0.48713	0	0	0.00591	0.42928	0.56481	0	-0.16065	0	0	0.92175	0.07825	0	0	-0.13555	0.00096	0.00593	0.91486	0.07825	0	0
1	02:06:02	LD222_(tall_wheat)	LD222_recurrent_parent_(tall)	Phosphorite	2021-03-17 18:26:23	119697	0.1697	0	0.01084	0.07183	0.91733	0	0	121.629	124.774	145.004	0	0.01274	0.84107	0.13908	0.00711	0	37.359	984.115	0.024	596.433	1.64791	71.679	0.41198	0.0075	0.01118	0.07029	0.39833	0.5127	0	-0.08566	0	0.00249	0.80644	0.19107	0	0	-0.15038	0.03829	0.02934	0.74116	0.19088	0.00033	0
1	02:06:03	LD222_(tall_wheat)	LD222_recurrent_parent_(tall)	Phosphorite	2021-03-17 18:26:23	80387.2	0.24145	0	0	0.00919	0.98608	0.00473	0	141.502	149.422	122.522	0.00046	0.02711	0.95346	0.01852	0.00046	0	35.949	568.101	0.014	310.282	1.70331	70.567	0.53876	0	0	0.0015	0.38142	0.61708	0	-0.00967	0	0	0.54845	0.45155	0	0	-0.00107	0	0	0.54845	0.45155	0	0
1	02:07:01	Chulpan_(rye)	S._cereale_Chulpan	KH2PO4	2021-03-17 18:26:23	44638.1	0.15769	0	0.00078	0.01983	0.97939	0	0	117.989	143.84	140.339	0	0.00328	0.92801	0.06871	0	0	17.081	378.324	0.009	104.421	3.40419	76.998	0.45855	0	0	0.00202	0.58035	0.41763	0	-0.07335	0	0	0.83127	0.16873	0	0	-0.05921	0	0	0.83127	0.16873	0	0
1	02:07:02	Chulpan_(rye)	S._cereale_Chulpan	KH2PO4	2021-03-17 18:26:23	74867.2	0.18198	0	0	0.01519	0.98481	0	0	119.806	157.684	141.387	0	0.00458	0.9238	0.07162	0	0	21.923	624.903	0.015	220.14	2.67817	82.718	0.45479	0	0	0.01869	0.49989	0.48142	0	-0.07898	0	0	0.91628	0.08372	0	0	-0.06355	0.00058	0.00047	0.91523	0.08372	0	0
1	02:07:03	Chulpan_(rye)	S._cereale_Chulpan	KH2PO4	2021-03-17 18:26:23	81813.9	0.23704	0	0	0.03692	0.95548	0.00759	0	121.367	146.343	127.295	0	0.0303	0.89152	0.07747	0.00071	0	36.51	674.101	0.017	382.644	1.68071	97.63	0.47504	0.00065	0	0.04331	0.38365	0.57238	0	0.00134	0	0	0.53538	0.46411	0.00051	0	-0.02124	0.00044	0	0.53494	0.4623	0.00233	0
1	02:08:01	LD222_Rht17_NIL	T._durum_LD222_Rht17_NIL	KH2PO4	2021-03-17 18:26:23	90643.6	0.16176	0	0	0.04354	0.95646	0	0	176.071	207.263	151.762	0	0.00084	0.81177	0.18623	0.00116	0	9.001	514.812	0.013	54.696	6.39021	129.741	0.50801	0	0	0	0.40137	0.59863	0	-0.1144	0	0	0.90403	0.09597	0	0	-0.09552	0	0	0.90403	0.09597	0	0
1	02:08:02	LD222_Rht17_NIL	T._durum_LD222_Rht17_NIL	KH2PO4	2021-03-17 18:26:23	94444.4	0.15643	0	0	0.01379	0.98621	0	0	172.721	196.72	153.345	0	0.00128	0.82117	0.17755	0	0	12.954	546.805	0.013	115.096	4.46025	124.503	0.46807	0	0	0.01116	0.56349	0.42535	0	-0.11861	0	0	0.89063	0.10937	0	0	-0.1033	0	0	0.89063	0.10937	0	0
1	02:08:03	LD222_Rht17_NIL	T._durum_LD222_Rht17_NIL	KH2PO4	2021-03-17 18:26:23	78366.6	0.26786	0	0	0.00802	0.98775	0.00422	0	167.024	201.714	130.81	0	0.01279	0.95341	0.03334	0.00046	0	18.233	469.194	0.012	133.434	3.19573	104.431	0.58518	0	0	0.01452	0.16997	0.81551	0	-0.05891	0	0	0.74066	0.25934	0	0	-0.0331	0	0	0.74066	0.25934	0	0
1	02:09:01	LD222_(tall_wheat)	LD222_recurrent_parent_(tall)	KH2PO4	2021-03-17 18:26:23	130648	0.17183	0	0.00257	0.05592	0.94151	0	0	163.229	165.719	147.384	0	0.01043	0.8334	0.15178	0.00439	0	38.834	800.398	0.02	491.623	1.59469	83.857	0.49197	0	0	0.01451	0.42995	0.55555	0	-0.1189	0	0.00614	0.88096	0.1129	0	0	-0.1005	0.00424	0.01363	0.86922	0.1129	0	0
1	02:09:02	LD222_(tall_wheat)	LD222_recurrent_parent_(tall)	KH2PO4	2021-03-17 18:26:23	151578	0.23251	0.00024	0.0029	0.02582	0.97105	0	0	186.192	213.645	135.03	0.00082	0.0176	0.93012	0.04777	0.00369	0	26.79	814.092	0.02	362.865	2.21852	112.625	0.50713	0.00137	0.00132	0.03192	0.30058	0.66481	0	-0.07371	0	0.00283	0.79847	0.19819	0.00051	0	-0.0608	0.00626	0.01392	0.78112	0.19562	0.00226	0.00081
1	02:09:03	LD222_(tall_wheat)	LD222_recurrent_parent_(tall)	KH2PO4	2021-03-17 18:26:23	86864.8	0.21174	0	0	0.05399	0.94107	0.00494	0	142.909	144.799	143.27	0	0.01391	0.84842	0.1328	0.00487	0	38.475	607.832	0.015	374.774	1.60721	63.432	0.56711	0	0	0.01006	0.22412	0.76582	0	-0.10992	0.00167	0.00444	0.82523	0.16866	0	0	-0.07686	0	0.00296	0.82837	0.16866	0	0
2	02:01:01	Chulpan_(rye)	S._cereale_Chulpan	w/o_P	2021-03-17 18:41:23	52342.5	0.18373	0	0	0.02305	0.97624	0.0007	0	132.034	155.402	145.697	0	0.01069	0.84061	0.1487	0	0	12.81	396.431	0.01	83.971	4.50944	78.609	0.50153	0	0	0	0.54597	0.45403	0	-0.08613	0	0	0.82353	0.17647	0	0	-0.08094	0	0	0.82353	0.17647	0	0
2	02:01:02	Chulpan_(rye)	S._cereale_Chulpan	w/o_P	2021-03-17 18:41:23	50428.4	0.11343	0	0	0.0076	0.9924	0	0	178.94	202.81	153.799	0	0.02073	0.88776	0.09152	0	0	7.465	281.817	0.007	30.022	7.6943	114.302	0.34712	0	0	0.02052	0.83382	0.14566	0	-0.09503	0	0	0.92618	0.07382	0	0	-0.09662	0	0	0.92618	0.07164	0.00218	0
2	02:01:03	Chulpan_(rye)	S._cereale_Chulpan	w/o_P	2021-03-17 18:41:23	8878.21	0.15532	0	0	0.07107	0.92893	0	0	80.585	80.414	120.572	0	0.09979	0.81388	0.0716	0.01473	0	9.855	110.171	0.003	13.202	5.8415	34.415	0.46197	0	0	0.00609	0.56816	0.42575	0	0.01246	0	0	0.52743	0.47257	0	0	0.00328	0	0	0.52743	0.47257	0	0
2	02:02:01	LD222_Rht17_NIL	T._durum_LD222_Rht17_NIL	w/o_P	2021-03-17 18:41:23	31381.8	0.18796	0	0	0.00629	0.99371	0	0	148.13	142.506	144.867	0	0.01162	0.93671	0.05167	0	0	12.921	211.853	0.005	42.038	4.47148	93.455	0.55214	0	0	0	0.37045	0.62955	0	-0.10586	0	0	0.91478	0.08522	0	0	-0.07072	0	0	0.91478	0.08522	0	0
2	02:02:02	LD222_Rht17_NIL	T._durum_LD222_Rht17_NIL	w/o_P	2021-03-17 18:41:23	69355.7	0.18284	0	0	0.0101	0.9899	0	0	171.086	188.662	150.198	0	0.00675	0.88552	0.10773	0	0	17.098	405.385	0.01	115.412	3.40089	111.779	0.52769	0	0	0	0.36382	0.63618	0	-0.13661	0	0	0.9034	0.0966	0	0	-0.09959	0	0	0.9034	0.0966	0	0
2	02:02:03	LD222_Rht17_NIL	T._durum_LD222_Rht17_NIL	w/o_P	2021-03-17 18:41:23	46879.1	0.14248	0	0	0.0432	0.9568	0	0	234.09	245.664	155.115	0	0.00731	0.85131	0.14137	0	0	15.799	200.261	0.005	49.856	3.67251	162.722	0.44982	0	0	0.00902	0.66085	0.33013	0	-0.11956	0	0	0.9419	0.0581	0	0	-0.1106	0	0	0.9419	0.0581	0	0
2	02:03:01	LD222_(tall_wheat)	LD222_recurrent_parent_(tall)	w/o_P	2021-03-17 18:41:23	111519	0.17888	0	0	0.01908	0.98092	0	0	235.308	249.276	151.589	0	0.00725	0.89848	0.09427	0	0	25.593	473.927	0.012	194.799	2.3148	153.965	0.51833	0	0	0.00189	0.38784	0.61027	0	-0.13753	0	0	0.92175	0.07825	0	0	-0.09896	0	0	0.92175	0.07825	0	0
2	02:03:02	LD222_(tall_wheat)	LD222_recurrent_parent_(tall)	w/o_P	2021-03-17 18:41:23	113651	0.19429	0	0	0.00916	0.99084	0	0	208.431	241.852	146.537	0	0.00919	0.87757	0.11324	0	0	18.9	545.266	0.013	173.21	3.0868	140.775	0.52625	0	0	0	0.444	0.556	0	-0.11471	0	0	0.87493	0.12507	0	0	-0.0848	0	0	0.87493	0.12507	0	0
2	02:03:03	LD222_(tall_wheat)	LD222_recurrent_parent_(tall)	w/o_P	2021-03-17 18:41:23	62282.2	0.21196	0	0	0.00331	0.99669	0	0	202.24	214.234	134.016	0	0.00711	0.95326	0.03963	0	0	27.936	307.963	0.008	137.144	2.13444	123.837	0.57044	0	0	0	0.21623	0.78377	0	-0.06409	0	0	0.85418	0.14582	0	0	-0.04228	0	0	0.85418	0.14582	0	0
2	02:04:01	Chulpan_(rye)	S._cereale_Chulpan	Phosphorite	2021-03-17 18:41:23	42419.4	0.14447	0	0	0.03138	0.96862	0	0	100.412	125.308	147.081	0	0.00963	0.86176	0.12743	0.00118	0	9.966	422.454	0.01	53.002	5.7771	63.27	0.43864	0	0	0	0.68145	0.31855	0	-0.08375	0	0	0.86689	0.13311	0	0	-0.07896	0	0	0.86689	0.13311	0	0
2	02:04:02	Chulpan_(rye)	S._cereale_Chulpan	Phosphorite	2021-03-17 18:41:23	103907	0.21024	0	0	0.00785	0.99215	0	0	121.605	143.565	139.879	0	0.00748	0.96172	0.03079	0	0	21.382	854.464	0.021	295.397	2.74264	71.88	0.55937	0	0	0	0.2308	0.7692	0	-0.09343	0	0	0.87614	0.12386	0	0	-0.05949	0	0	0.87614	0.12386	0	0
2	02:04:03	Chulpan_(rye)	S._cereale_Chulpan	Phosphorite	2021-03-17 18:41:23	41872.5	0.15758	0	0	0.00972	0.99028	0	0	117.246	128.834	134.008	0	0.0475	0.90695	0.04555	0	0	8.873	357.135	0.009	36.699	6.4812	76.632	0.41115	0	0	0.00792	0.78524	0.20684	0	-0.04081	0	0	0.75358	0.24642	0	0	-0.03242	0	0	0.75358	0.24355	0.00287	0
2	02:05:01	LD222_Rht17_NIL	T._durum_LD222_Rht17_NIL	Phosphorite	2021-03-17 18:41:23	53619	0.11797	0	0.00104	0.08298	0.91598	0	0	140.797	175.691	166.579	0	0.00924	0.65764	0.32958	0.00355	0	11.346	380.825	0.009	68.72	5.08206	97.497	0.44278	0	0	0.00331	0.72149	0.27521	0	-0.15524	0	0	0.94153	0.05847	0	0	-0.14873	0	0.0044	0.93714	0.05847	0	0
2	02:05:02	LD222_Rht17_NIL	T._durum_LD222_Rht17_NIL	Phosphorite	2021-03-17 18:41:23	75180.5	0.16825	0	0	0.00406	0.99594	0	0	172.006	196.626	152.926	0	0.00833	0.84386	0.14781	0	0	15.251	437.08	0.011	108.333	3.80095	101.55	0.4991	0	0	0.00059	0.5267	0.47271	0	-0.13514	0	0	0.91981	0.08019	0	0	-0.10433	0	0	0.91981	0.08019	0	0
2	02:05:03	LD222_Rht17_NIL	T._durum_LD222_Rht17_NIL	Phosphorite	2021-03-17 18:41:23	42247.5	0.14062	0	0	0.02289	0.97711	0	0	172.491	185.743	154.441	0	0.023	0.83089	0.14611	0	0	9.891	244.926	0.006	23.392	5.82034	90.567	0.51517	0	0	0	0.39114	0.60886	0	-0.11906	0	0	0.90079	0.09921	0	0	-0.08376	0	0	0.90079	0.09921	0	0
2	02:06:01	LD222_(tall_wheat)	LD222_recurrent_parent_(tall)	Phosphorite	2021-03-17 18:41:23	96989.7	0.15442	0	0	0.02027	0.97973	0	0	209.264	229.88	163.709	0	0.0023	0.78421	0.21349	0	0	30.606	463.481	0.011	243.654	1.96403	110.445	0.52316	0	0	0	0.32402	0.67598	0	-0.1915	0	0	0.98408	0.01592	0	0	-0.1463	0	0	0.98408	0.01592	0	0
2	02:06:02	LD222_(tall_wheat)	LD222_recurrent_parent_(tall)	Phosphorite	2021-03-17 18:41:23	96964.3	0.24035	0	0	0.01722	0.9824	0.00038	0	133.039	136.96	132.232	0	0.02397	0.94524	0.02924	0.00156	0	38.572	728.843	0.018	447.371	1.60379	69.287	0.52872	0	0	0.00956	0.30765	0.68279	0	-0.05811	0	0.00082	0.68796	0.31122	0	0	-0.04235	0	0.00131	0.68747	0.31088	0.00035	0
2	02:06:03	LD222_(tall_wheat)	LD222_recurrent_parent_(tall)	Phosphorite	2021-03-17 18:41:23	51249.3	0.16361	0	0	0.04846	0.95154	0	0	115.381	130.914	146.808	0.00052	0.01248	0.80227	0.18382	0.00091	0	41.468	444.174	0.011	289.046	1.51008	48.746	0.43284	0	0	0.02471	0.49751	0.47777	0	-0.07427	0	0	0.79085	0.20915	0	0	-0.07886	0	0	0.79085	0.20915	0	0
2	02:07:01	Chulpan_(rye)	S._cereale_Chulpan	KH2PO4	2021-03-17 18:41:23	52920.3	0.21535	0	0	0.00063	0.99937	0	0	111.204	134.204	126.021	0	0.00499	0.99276	0.00225	0	0	13.499	475.883	0.012	93.882	4.28313	78.089	0.53795	0	0	0	0.30653	0.69347	0	-0.02003	0	0	0.65004	0.34996	0	0	-0.0155	0	0	0.65004	0.34996	0	0
2	02:07:02	Chulpan_(rye)	S._cereale_Chulpan	KH2PO4	2021-03-17 18:41:23	82751.3	0.18006	0	0.00093	0.01642	0.98265	0	0	139.485	162.319	144.044	0	0.01101	0.88068	0.10726	0.00105	0	21.056	593.264	0.015	199.478	2.7831	91.313	0.46912	0	0	0.01412	0.4836	0.50227	0	-0.0863	0	0	0.87943	0.12057	0	0	-0.07283	0.00093	0	0.8785	0.12057	0	0
2	02:07:03	Chulpan_(rye)	S._cereale_Chulpan	KH2PO4	2021-03-17 18:41:23	83619.5	0.23971	0	0	0.01686	0.97996	0.00319	0	112.236	165.437	119.51	0	0.03757	0.93437	0.02767	0.0004	0	38.327	745.036	0.018	446.515	1.61244	88.508	0.51369	0	0	0.01045	0.39145	0.59811	0	0.01943	0	0	0.45766	0.54234	0	0	0.0075	0	0	0.45766	0.54151	0.00083	0
2	02:08:01	LD222_Rht17_NIL	T._durum_LD222_Rht17_NIL	KH2PO4	2021-03-17 18:41:23	73338.7	0.13373	0	0	0.07422	0.92578	0	0	176.342	184.877	161.046	0	0.01066	0.6927	0.29664	0	0	9.233	415.889	0.01	47.574	6.2306	110.852	0.44751	0	0	0.0018	0.63761	0.36059	0	-0.13211	0	0	0.92484	0.07516	0	0	-0.13182	0	0.00503	0.91981	0.07516	0	0
2	02:08:02	LD222_Rht17_NIL	T._durum_LD222_Rht17_NIL	KH2PO4	2021-03-17 18:41:23	91205.2	0.13547	0	0	0.01696	0.98304	0	0	175.883	202.246	160.176	0	0.00413	0.79161	0.20426	0	0	12.16	518.557	0.013	101.876	4.74651	129.611	0.46039	0	0	0.00474	0.64236	0.3529	0	-0.14212	0	0	0.94127	0.05873	0	0	-0.12597	0	0	0.94127	0.05873	0	0
2	02:08:03	LD222_Rht17_NIL	T._durum_LD222_Rht17_NIL	KH2PO4	2021-03-17 18:41:23	37061.8	0.15769	0	0	0.04483	0.95517	0	0	180.938	187.738	148.632	0	0.00451	0.84019	0.15531	0	0	20.928	204.832	0.005	70.844	2.7994	110.105	0.51264	0	0.00558	0	0.36808	0.62635	0	-0.10544	0	0	0.87878	0.12122	0	0	-0.09886	0.00558	0	0.87321	0.12122	0	0
2	02:09:01	LD222_(tall_wheat)	LD222_recurrent_parent_(tall)	KH2PO4	2021-03-17 18:41:23	110818	0.17681	0.00155	0.00251	0.13563	0.85797	0.00233	0	171.624	175.308	148.389	0	0.01423	0.76858	0.21041	0.00678	0	40.351	645.701	0.016	405.109	1.54444	89.34	0.52208	0	0	0.01739	0.34892	0.6337	0	-0.11849	0	0.01213	0.84288	0.145	0	0	-0.1113	0.00283	0.03841	0.81376	0.14421	0.00079	0
2	02:09:02	LD222_(tall_wheat)	LD222_recurrent_parent_(tall)	KH2PO4	2021-03-17 18:41:23	133242	0.26	0	0	0.00664	0.993	0.00037	0	179.272	206.645	130.133	0	0.00495	0.9814	0.01365	0	0	30.28	743.24	0.018	367.438	1.98315	102.334	0.56887	0	0	0.00332	0.24028	0.7564	0	-0.05724	0	0.00046	0.76503	0.23451	0	0	-0.03249	0	0.00217	0.76333	0.23451	0	0
2	02:09:03	LD222_(tall_wheat)	LD222_recurrent_parent_(tall)	KH2PO4	2021-03-17 18:41:23	97843.7	0.24897	0	0	0.0105	0.98264	0.00686	0	144.371	146.524	129.983	0	0.02355	0.95125	0.02251	0.00268	0	34.594	677.726	0.017	366.241	1.76123	81.606	0.57784	0	0	0.00515	0.21046	0.78438	0	-0.05901	0	0.0007	0.704	0.2948	0.00051	0	-0.0317	0	0	0.70469	0.29531	0	0
1	01:01:01	Chulpan_(rye)	S._cereale_Chulpan	w/o_P	2021-03-19 14:48:50	168207	0.15867	0	0	0.03494	0.96506	0	0	144.429	171.766	150.186	0	0.01292	0.84152	0.14393	0.00163	0	23.923	1164.64	0.029	443.575	2.46581	94.651	0.4682	0	0	0.00511	0.59006	0.40483	0	-0.10409	0	0.00052	0.82229	0.17719	0	0	-0.09368	0	0.00382	0.819	0.17719	0	0
1	01:01:02	Chulpan_(rye)	S._cereale_Chulpan	w/o_P	2021-03-19 14:48:50	77006.5	0.1801	0	0	0.00317	0.99683	0	0	139.84	168.761	144.004	0	0.00139	0.96895	0.02966	0	0	15.732	550.677	0.014	137.308	3.68757	76.781	0.50091	0	0	0.0016	0.41857	0.57983	0	-0.10617	0	0	0.94462	0.05538	0	0	-0.07943	0	0	0.94462	0.05538	0	0
1	01:01:03	Chulpan_(rye)	S._cereale_Chulpan	w/o_P	2021-03-19 14:48:50	57179	0.19871	0	0	0	1	0	0	150.011	158.133	134.634	0	0.00421	0.98245	0.01334	0	0	13.032	381.165	0.009	70.905	4.434	86.384	0.5098	0	0	0	0.51683	0.48317	0	-0.06013	0	0	0.83504	0.16496	0	0	-0.04317	0	0	0.83504	0.16496	0	0
1	01:02:01	LD222_Rht17_NIL	T._durum_LD222_Rht17_NIL	w/o_P	2021-03-19 14:48:50	115553	0.1439	0	0	0.07838	0.92097	0.00065	0	191.765	212.223	164.112	0	0.00484	0.66092	0.33301	0.00124	0	20.76	602.576	0.015	195.95	2.82093	141.6	0.51496	0	0	0.00031	0.38484	0.61484	0	-0.16989	0	0.01122	0.89732	0.09147	0	0	-0.15081	0	0.0226	0.88593	0.09147	0	0
1	01:02:02	LD222_Rht17_NIL	T._durum_LD222_Rht17_NIL	w/o_P	2021-03-19 14:48:50	124929	0.14005	0	0	0.03536	0.96464	0	0	176.881	205.186	160.239	0	0.00043	0.80051	0.19907	0	0	15.389	706.287	0.017	176.873	3.76783	116.026	0.48602	0	0	0.00754	0.44322	0.54924	0	-0.14982	0	0	0.96476	0.03524	0	0	-0.12609	0	0.00285	0.96191	0.03524	0	0
1	01:02:03	LD222_Rht17_NIL	T._durum_LD222_Rht17_NIL	w/o_P	2021-03-19 14:48:50	93741.3	0.19473	0	0	0.02576	0.97368	0.00056	0	155.337	199.266	139.383	0.00094	0.01378	0.91298	0.06801	0.0043	0	18.633	603.471	0.015	167.185	3.12956	100.213	0.51906	0	0	0.01127	0.3099	0.67884	0	-0.08132	0	0	0.84348	0.15652	0	0	-0.05579	0	0	0.84348	0.15652	0	0
1	01:03:01	LD222_(tall_wheat)	LD222_recurrent_parent_(tall)	w/o_P	2021-03-19 14:48:50	32094.2	0.23111	0	0	0.01651	0.9825	0.00099	0	73.209	80.117	131.083	0	0.01442	0.87978	0.1058	0	0	44.515	438.392	0.011	304.107	1.42631	55.933	0.49586	0	0	0.00903	0.45171	0.53926	0	-0.05418	0	0.00175	0.69486	0.30206	0.00133	0	-0.045	0	0.00518	0.69144	0.30004	0.00245	0.00089
1	01:03:02	LD222_(tall_wheat)	LD222_recurrent_parent_(tall)	w/o_P	2021-03-19 14:48:50	191482	0.23798	0.0003	0.00047	0.02949	0.96859	0.00115	0	166.205	181.578	135.416	0	0.00978	0.92936	0.05877	0.00209	0	34.008	1152.08	0.028	582.108	1.78784	98.094	0.54168	0.00035	0.0003	0.02408	0.25904	0.71623	0	-0.07774	0.00092	0.00255	0.82246	0.17407	0	0	-0.06286	0.00485	0.01193	0.80912	0.1739	0.0002	0
1	01:03:03	LD222_(tall_wheat)	LD222_recurrent_parent_(tall)	w/o_P	2021-03-19 14:48:50	80516.3	0.20525	0	0	0.04014	0.95986	0	0	144.023	145.08	141.385	0	0.00615	0.8738	0.1181	0.00196	0	43	559.052	0.014	379.48	1.46624	65.376	0.51702	0	0	0.0162	0.30867	0.67513	0	-0.07596	0	0	0.76807	0.23193	0	0	-0.0703	0	0	0.76807	0.23193	0	0
1	01:04:01	Chulpan_(rye)	S._cereale_Chulpan	Phosphorite	2021-03-19 14:48:50	34362.8	0.14734	0	0	0.01755	0.98245	0	0	139.071	135.695	138.674	0	0.01257	0.91804	0.06939	0	0	12.211	247.088	0.006	33.176	4.72695	98.864	0.46663	0	0	0.00666	0.59049	0.40285	0	-0.05784	0	0	0.83477	0.16523	0	0	-0.04753	0	0.00102	0.83375	0.16523	0	0
1	01:04:02	Chulpan_(rye)	S._cereale_Chulpan	Phosphorite	2021-03-19 14:48:50	79261.6	0.15319	0	0	0.01161	0.98839	0	0	147.868	189.612	148.23	0	0.00617	0.91832	0.07518	0.00034	0	13.061	536.029	0.013	114.396	4.4242	101.566	0.45367	0	0	0.00638	0.52321	0.47041	0	-0.09464	0	0	0.88674	0.11326	0	0	-0.08014	0	0	0.88674	0.11326	0	0
1	01:04:03	Chulpan_(rye)	S._cereale_Chulpan	Phosphorite	2021-03-19 14:48:50	126144	0.15949	0	0	0.05152	0.94759	0.00089	0	153.882	173.928	144.48	0	0.0239	0.8653	0.10822	0.00258	0	17.146	819.743	0.02	204.54	3.39161	97.765	0.46374	0	0	0.01313	0.51072	0.47615	0	-0.08669	0	0.00058	0.85356	0.14526	0.0006	0	-0.07287	0	0.00284	0.85129	0.14587	0	0
1	01:05:01	LD222_Rht17_NIL	T._durum_LD222_Rht17_NIL	Phosphorite	2021-03-19 14:48:50	43249.5	0.13546	0	0	0.02719	0.97281	0	0	165.503	175.758	160.532	0	0.008	0.76237	0.22963	0	0	9.298	261.322	0.006	32.486	6.18774	93.207	0.45712	0	0	0	0.60752	0.39248	0	-0.14611	0	0	0.96911	0.03089	0	0	-0.13493	0	0.00129	0.96782	0.03089	0	0
1	01:05:02	LD222_Rht17_NIL	T._durum_LD222_Rht17_NIL	Phosphorite	2021-03-19 14:48:50	80510.9	0.0988	0	0	0.08803	0.91197	0	0	168.475	193.248	169.605	0	0.00426	0.66414	0.33107	0.00053	0	13.524	477.881	0.012	99.166	4.27563	89.851	0.39003	0	0	0.01594	0.74035	0.24371	0	-0.13877	0	0.00057	0.96845	0.03098	0	0	-0.13911	0	0.00187	0.96714	0.03098	0	0
1	01:05:03	LD222_Rht17_NIL	T._durum_LD222_Rht17_NIL	Phosphorite	2021-03-19 14:48:50	96757.7	0.17697	0	0	0.06466	0.93534	0	0	172.989	191.352	149.121	0	0.01313	0.81409	0.16648	0.0063	0	10.978	559.329	0.014	77.383	5.25031	109.61	0.51029	0	0	0.00545	0.38086	0.6137	0	-0.10282	0	0.00046	0.8631	0.13573	0.00071	0	-0.078	0	0	0.86356	0.13573	0.00071	0
1	01:06:01	LD222_(tall_wheat)	LD222_recurrent_parent_(tall)	Phosphorite	2021-03-19 14:48:50	163744	0.12969	0.00028	0.00102	0.14466	0.85373	0.00031	0	166.947	181.752	161.405	0	0.01469	0.73121	0.24822	0.00588	0	39.293	980.811	0.024	576.331	1.57901	114.854	0.48708	0	0	0.01874	0.41098	0.57028	0	-0.1616	0	0.03689	0.8613	0.10181	0	0	-0.14842	0.00023	0.06022	0.83774	0.10158	0.00022	0
1	01:06:02	LD222_(tall_wheat)	LD222_recurrent_parent_(tall)	Phosphorite	2021-03-19 14:48:50	175666	0.20069	0.00088	0.00201	0.07961	0.91749	0	0	137.701	140.901	140.852	0.00017	0.011	0.85805	0.1215	0.00928	0	38.497	1275.71	0.031	675.473	1.60643	112.71	0.48076	0.00097	0.00337	0.07379	0.27203	0.64984	0	-0.08623	0	0.00627	0.82997	0.16376	0	0	-0.10935	0.01633	0.02004	0.79971	0.16372	0.0002	0
1	01:06:03	LD222_(tall_wheat)	LD222_recurrent_parent_(tall)	Phosphorite	2021-03-19 14:48:50	63968.4	0.20338	0	0	0.01238	0.98762	0	0	219.53	218.078	130.669	0	0.01726	0.94235	0.03763	0.00276	0	14.461	291.389	0.007	60.121	4.00386	133.786	0.48148	0	0	0.00157	0.46645	0.53199	0	-0.04183	0	0	0.71443	0.28557	0	0	-0.0307	0	0	0.71443	0.284	0.00157	0
1	01:07:01	Chulpan_(rye)	S._cereale_Chulpan	KH2PO4	2021-03-19 14:48:50	130892	0.18963	0	0.00021	0.01805	0.98174	0	0	125.069	138.007	142.014	0	0.00529	0.9267	0.068	0	0	27.693	1046.56	0.026	467.336	2.15165	83.152	0.48981	0	0	0.00088	0.49177	0.50735	0	-0.09625	0	0.00021	0.8974	0.10239	0	0	-0.07578	0.00073	0.00051	0.89636	0.10239	0	0
1	01:07:02	Chulpan_(rye)	S._cereale_Chulpan	KH2PO4	2021-03-19 14:48:50	112366	0.18243	0	0.0009	0.00291	0.99619	0	0	150.444	182.456	135.543	0	0.00545	0.95258	0.0406	0.00137	0	20.67	746.896	0.018	255.215	2.8327	108.269	0.43982	0	0.00027	0.00923	0.68308	0.30742	0	-0.05501	0	0.00109	0.78134	0.21757	0	0	-0.05547	0.00172	0.00149	0.77921	0.2167	0.00087	0
1	01:07:03	Chulpan_(rye)	S._cereale_Chulpan	KH2PO4	2021-03-19 14:48:50	148772	0.25267	0	0	0.0241	0.96632	0.00958	0	91.999	108.187	121.435	0	0.03259	0.91136	0.05273	0.00332	0	35.546	1617.11	0.04	836.412	1.72004	62.643	0.491	0	0	0.02614	0.41644	0.55743	0	0.01686	0	0.00069	0.45519	0.54329	0.00083	0	-0.00072	0	0.00326	0.45262	0.54292	0.0012	0
1	01:08:01	LD222_Rht17_NIL	T._durum_LD222_Rht17_NIL	KH2PO4	2021-03-19 14:48:50	45534.4	0.13988	0	0	0.06991	0.93009	0	0	164.695	175.288	165.56	0	0.00645	0.75162	0.24091	0.00103	0	25.603	276.478	0.007	114.974	2.3139	116.384	0.54225	0	0	0.00626	0.27873	0.71501	0	-0.19689	0	0.01449	0.95611	0.0294	0	0	-0.14811	0.00219	0.0227	0.9457	0.0294	0	0
1	01:08:02	LD222_Rht17_NIL	T._durum_LD222_Rht17_NIL	KH2PO4	2021-03-19 14:48:50	70547.9	0.16434	0	0	0.01006	0.98994	0	0	171.467	190.435	153.549	0	0.00264	0.86988	0.12748	0	0	11.737	411.437	0.01	81.561	4.91488	106.054	0.4966	0	0	0	0.40849	0.59151	0	-0.12644	0	0	0.94573	0.05427	0	0	-0.1064	0	0	0.94573	0.05427	0	0
1	01:08:03	LD222_Rht17_NIL	T._durum_LD222_Rht17_NIL	KH2PO4	2021-03-19 14:48:50	68386.9	0.24543	0	0	0.01256	0.98643	0.00101	0	156.722	186.465	133.885	0	0.00786	0.97057	0.01848	0.00309	0	15.476	436.359	0.011	99.792	3.74717	96.054	0.58854	0	0	0.00099	0.19827	0.80074	0	-0.0787	0	0	0.84077	0.15923	0	0	-0.04236	0	0	0.84077	0.15923	0	0
1	01:09:01	LD222_(tall_wheat)	LD222_recurrent_parent_(tall)	KH2PO4	2021-03-19 14:48:50	130975	0.21079	0	0.00064	0.04598	0.95267	0.00071	0	105.96	108.883	135.12	0.00019	0.02688	0.89371	0.0731	0.00613	0	44.548	1236.08	0.03	810.225	1.42546	71.266	0.52122	0	0.00067	0.01388	0.3226	0.66284	0	-0.07048	0	0.00218	0.78875	0.20906	0	0	-0.05917	0.00231	0.01048	0.77809	0.20912	0	0
1	01:09:02	LD222_(tall_wheat)	LD222_recurrent_parent_(tall)	KH2PO4	2021-03-19 14:48:50	218463	0.25588	0.00025	0.00053	0.03632	0.96225	0.00065	0	132.884	149.649	125.78	0	0.02585	0.91382	0.05756	0.00277	0	42.843	1644.02	0.041	955.481	1.47058	101.781	0.52573	0.00028	0.00029	0.01585	0.30962	0.67397	0	-0.01756	0.00037	0.0021	0.57129	0.42625	0	0	-0.03001	0.00573	0.01282	0.55525	0.4257	0.0005	0
1	01:09:03	LD222_(tall_wheat)	LD222_recurrent_parent_(tall)	KH2PO4	2021-03-19 14:48:50	86192.8	0.27406	0	0.00028	0.0263	0.97012	0.00329	0	101.888	103.63	121.461	0	0.02984	0.93585	0.03109	0.00322	0	46.358	845.957	0.021	605.402	1.38183	34.149	0.55507	0	0.00031	0.01925	0.23686	0.74359	0	-0.00747	0	0.00371	0.49632	0.49929	0.00068	0	-0.00725	0.00057	0.00482	0.49464	0.49843	0.00154	0
2	01:01:01	Chulpan_(rye)	S._cereale_Chulpan	w/o_P	2021-03-19 15:01:38	65456.1	0.16932	0	0	0.03208	0.96792	0	0	97.864	113.38	149.266	0	0.005	0.85994	0.13368	0.00138	0	26.792	668.85	0.017	289.788	2.2184	70.691	0.48866	0	0	0.00396	0.47822	0.51782	0	-0.11452	0	0.00065	0.89748	0.10187	0	0	-0.0994	0	0.00532	0.89281	0.10145	0.00042	0
2	01:01:02	Chulpan_(rye)	S._cereale_Chulpan	w/o_P	2021-03-19 15:01:38	97694.6	0.21603	0	0	0.01183	0.98817	0	0	134.338	159.331	129.999	0	0.01067	0.95254	0.03679	0	0	19.198	727.228	0.018	237.109	3.04079	95.023	0.5122	0	0	0	0.38046	0.61954	0	-0.03673	0	0	0.7347	0.2653	0	0	-0.03114	0	0	0.7347	0.2653	0	0
2	01:01:03	Chulpan_(rye)	S._cereale_Chulpan	w/o_P	2021-03-19 15:01:38	23500	0.13797	0	0	0.009	0.991	0	0	160.15	169.15	141.611	0	0.00675	0.90665	0.0866	0	0	15.889	146.737	0.004	36.894	3.65215	108.14	0.43785	0	0	0.00199	0.67287	0.32513	0	-0.06615	0	0	0.8913	0.1087	0	0	-0.05893	0	0	0.8913	0.1087	0	0
2	01:02:01	LD222_Rht17_NIL	T._durum_LD222_Rht17_NIL	w/o_P	2021-03-19 15:01:38	70676.7	0.14745	0	0	0.06618	0.93382	0	0	172.123	146.176	158.523	0	0.00931	0.76469	0.226	0	0	16.292	410.617	0.01	103.598	3.56419	113.335	0.50128	0	0	0.00055	0.40201	0.59744	0	-0.15564	0	0.00308	0.91693	0.07999	0	0	-0.13044	0	0.00602	0.91399	0.07999	0	0
2	01:02:02	LD222_Rht17_NIL	T._durum_LD222_Rht17_NIL	w/o_P	2021-03-19 15:01:38	109105	0.16876	0	0	0.02746	0.97213	0.00042	0	168.37	205.819	155.376	0	0.00617	0.80471	0.18781	0.00131	0	20.79	648.009	0.016	228.729	2.81702	90.118	0.49641	0	0	0.01827	0.3732	0.60852	0	-0.13679	0	0	0.94056	0.05944	0	0	-0.1091	0	0	0.94056	0.05944	0	0
2	01:02:03	LD222_Rht17_NIL	T._durum_LD222_Rht17_NIL	w/o_P	2021-03-19 15:01:38	82817.4	0.14034	0	0	0.03542	0.96458	0	0	163.27	188.025	150.427	0	0.0076	0.86025	0.13018	0.00196	0	19.978	507.241	0.013	149.562	2.9266	76.861	0.46336	0	0	0.01634	0.47055	0.51311	0	-0.09987	0	0	0.87347	0.12653	0	0	-0.08293	0	0	0.87347	0.12653	0	0
2	01:03:01	LD222_(tall_wheat)	LD222_recurrent_parent_(tall)	w/o_P	2021-03-19 15:01:38	86186.3	0.19644	0.00034	0.00144	0.10547	0.88877	0.00398	0	104.847	122.475	144.842	0	0.02314	0.78518	0.18966	0.00203	0	38.735	822.018	0.02	503.718	1.59812	43.539	0.51111	0	0.00093	0.02014	0.3208	0.65812	0	-0.11462	0.00034	0.02331	0.75662	0.21973	0	0	-0.12649	0.01261	0.04945	0.71801	0.21967	0.00026	0
2	01:03:02	LD222_(tall_wheat)	LD222_recurrent_parent_(tall)	w/o_P	2021-03-19 15:01:38	155991	0.24179	0.00024	0.00115	0.04193	0.95422	0.00246	0	163.577	180.051	135.6	0.0003	0.00935	0.91553	0.07289	0.00193	0	33.796	953.623	0.024	507.971	1.79773	98.458	0.53198	0.00129	0	0.03092	0.2686	0.69919	0	-0.07822	0.00048	0.00186	0.81003	0.18763	0	0	-0.06493	0.0053	0.01373	0.79334	0.1873	0.00034	0
2	01:03:03	LD222_(tall_wheat)	LD222_recurrent_parent_(tall)	w/o_P	2021-03-19 15:01:38	72140.9	0.21678	0	0	0.04457	0.95543	0	0	149.981	151.21	134.057	0	0.02277	0.89386	0.07778	0.00559	0	39.399	481.001	0.012	304.479	1.57547	72.323	0.51717	0	0	0.02886	0.29629	0.67485	0	-0.05178	0	0	0.66612	0.33388	0	0	-0.04293	0	0.00138	0.66474	0.33388	0	0
2	01:04:01	Chulpan_(rye)	S._cereale_Chulpan	Phosphorite	2021-03-19 15:01:38	48682.9	0.13425	0	0	0.01886	0.98114	0	0	139.253	151.936	153.179	0	0.00213	0.87017	0.1277	0	0	8.265	349.6	0.009	32.95	6.95404	65.918	0.38634	0	0	0	0.84798	0.15202	0	-0.10645	0	0	0.96014	0.03986	0	0	-0.10861	0	0	0.96014	0.03986	0	0
2	01:04:02	Chulpan_(rye)	S._cereale_Chulpan	Phosphorite	2021-03-19 15:01:38	75771.5	0.17485	0	0	0.02004	0.97996	0	0	158.433	188.448	139.112	0	0.00626	0.85008	0.14317	0.00049	0	12.574	478.256	0.012	93.91	4.59259	117.354	0.46318	0	0	0.00332	0.50775	0.48893	0	-0.04095	0	0	0.65786	0.34214	0	0	-0.0492	0	0	0.65786	0.34214	0	0
2	01:04:03	Chulpan_(rye)	S._cereale_Chulpan	Phosphorite	2021-03-19 15:01:38	55159	0.18346	0	0	0.01976	0.97934	0.0009	0	158.836	171.108	144.772	0	0.00877	0.93212	0.05749	0.00162	0	19.664	347.271	0.009	110.965	2.97137	93.632	0.52197	0	0	0	0.41757	0.58243	0	-0.10175	0	0	0.90269	0.09731	0	0	-0.06628	0	0	0.90269	0.09731	0	0
2	01:05:01	LD222_Rht17_NIL	T._durum_LD222_Rht17_NIL	Phosphorite	2021-03-19 15:01:38	97145.5	0.20877	0	0	0.02693	0.97307	0	0	177.285	187.684	141.793	0	0.00977	0.90276	0.08654	0.00093	0	13.452	547.963	0.014	108.954	4.29799	117.498	0.58892	0	0	0	0.18648	0.81352	0	-0.10089	0	0	0.85415	0.14585	0	0	-0.06415	0	0	0.85415	0.14585	0	0
2	01:05:02	LD222_Rht17_NIL	T._durum_LD222_Rht17_NIL	Phosphorite	2021-03-19 15:01:38	70845.3	0.12119	0	0	0.03071	0.96929	0	0	154.59	194.41	164.499	0	0.01656	0.77328	0.21016	0	0	10.521	458.279	0.011	79.483	5.47515	91.849	0.44158	0	0.00128	0.00618	0.62612	0.36642	0	-0.15034	0	0	0.95346	0.04575	0.00079	0	-0.13208	0	0.00075	0.95271	0.04429	0.00044	0.00181
2	01:05:03	LD222_Rht17_NIL	T._durum_LD222_Rht17_NIL	Phosphorite	2021-03-19 15:01:38	67077.7	0.20928	0	0	0.01129	0.98519	0.00352	0	176.285	211.067	141.101	0	0.01634	0.9355	0.04816	0	0	13.515	380.508	0.009	79.641	4.27829	84.406	0.55571	0	0.0017	0.00307	0.27971	0.71552	0	-0.10618	0	0	0.87419	0.12581	0	0	-0.05813	0	0	0.87419	0.12412	0	0.0017
2	01:06:01	LD222_(tall_wheat)	LD222_recurrent_parent_(tall)	Phosphorite	2021-03-19 15:01:38	105221	0.17866	0	0.00102	0.05832	0.94066	0	0	169.674	180.599	150.597	0	0.01358	0.82983	0.15518	0.00141	0	39.169	620.139	0.015	387.954	1.5832	119.087	0.56116	0	0	0.00283	0.25952	0.73765	0	-0.14119	0	0.00572	0.90206	0.09222	0	0	-0.09901	0.00044	0.00707	0.90027	0.09222	0	0
2	01:06:02	LD222_(tall_wheat)	LD222_recurrent_parent_(tall)	Phosphorite	2021-03-19 15:01:38	137209	0.17389	0.00023	0.00374	0.11717	0.87886	0	0	135.934	138.657	146.137	0	0.01024	0.81248	0.15894	0.01834	0	37.898	1009.38	0.025	619.163	1.62791	114.267	0.44206	0.00374	0.00641	0.07992	0.32252	0.5874	0	-0.09495	0	0.00364	0.86126	0.1351	0	0	-0.11796	0.01551	0.03274	0.81665	0.1351	0	0
2	01:06:03	LD222_(tall_wheat)	LD222_recurrent_parent_(tall)	Phosphorite	2021-03-19 15:01:38	56200.9	0.1696	0	0.0012	0.03907	0.95878	0.00095	0	207.304	242.311	142.77	0	0.02492	0.87226	0.09682	0.006	0	17.143	271.104	0.007	71.775	3.39228	117.212	0.3436	0	0	0.04353	0.68228	0.2742	0	-0.06209	0	0.00256	0.83683	0.15582	0.00478	0	-0.0811	0.00563	0.00941	0.82436	0.15563	0.00498	0
2	01:07:01	Chulpan_(rye)	S._cereale_Chulpan	KH2PO4	2021-03-19 15:01:38	93747.8	0.17075	0	0	0.04421	0.95498	0.00082	0	129.452	182.838	148.215	0	0.00562	0.83353	0.16044	0.00041	0	25.428	724.188	0.018	300	2.32879	99.214	0.49106	0	0.00052	0.00599	0.48072	0.51278	0	-0.11051	0	0.00186	0.88119	0.11695	0	0	-0.09046	0.00052	0.00244	0.8801	0.11578	0.00118	0
2	01:07:02	Chulpan_(rye)	S._cereale_Chulpan	KH2PO4	2021-03-19 15:01:38	99860.6	0.1661	0	0	0.00957	0.99043	0	0	134.311	186.011	140.85	0	0.01619	0.93804	0.04524	0.00053	0	18.226	743.502	0.018	221.579	3.19694	97.381	0.44497	0	0	0.0017	0.68654	0.31176	0	-0.07303	0	0	0.87247	0.12753	0	0	-0.06455	0	0	0.87247	0.12753	0	0
2	01:07:03	Chulpan_(rye)	S._cereale_Chulpan	KH2PO4	2021-03-19 15:01:38	93331.3	0.20501	0	0	0.0604	0.93739	0.0022	0	90.73	108.751	133.549	0	0.03164	0.84193	0.12063	0.00581	0	37.595	1028.67	0.025	604.628	1.63908	66.458	0.43396	0	0	0.04305	0.51538	0.44156	0	-0.01407	0	0.00032	0.61343	0.38574	0.00051	0	-0.03221	0.00032	0	0.61343	0.38625	0	0
2	01:08:01	LD222_Rht17_NIL	T._durum_LD222_Rht17_NIL	KH2PO4	2021-03-19 15:01:38	96345.1	0.25503	0	0	0.0085	0.98772	0.00378	0	149.45	174.268	133.429	0	0.01525	0.93456	0.05019	0	0	20.628	644.664	0.016	221.324	2.83828	103.814	0.61223	0	0	0	0.13463	0.86537	0	-0.05821	0	0.00082	0.71259	0.28659	0	0	-0.03948	0	0	0.71341	0.28659	0	0
2	01:08:02	LD222_Rht17_NIL	T._durum_LD222_Rht17_NIL	KH2PO4	2021-03-19 15:01:38	110199	0.20616	0	0	0.01528	0.98472	0	0	173.091	201.388	141.103	0	0.00933	0.88645	0.10422	0	0	13.227	636.654	0.016	139.205	4.36971	114.064	0.51148	0	0	0	0.40854	0.59146	0	-0.0723	0	0	0.7649	0.2351	0	0	-0.06793	0	0	0.7649	0.2351	0	0
2	01:08:03	LD222_Rht17_NIL	T._durum_LD222_Rht17_NIL	KH2PO4	2021-03-19 15:01:38	41345.1	0.21313	0	0	0.01058	0.98942	0	0	167.786	173.278	129.09	0.00552	0.01949	0.92496	0.05003	0	0	23.26	246.416	0.006	95.375	2.5321	82.881	0.50126	0	0	0.00472	0.39793	0.59735	0	-0.02765	0	0	0.60098	0.39902	0	0	-0.02973	0	0.00303	0.59794	0.39902	0	0
2	01:09:01	LD222_(tall_wheat)	LD222_recurrent_parent_(tall)	KH2PO4	2021-03-19 15:01:38	82029.9	0.24573	0	0.00033	0.02584	0.97383	0	0	125.268	180.715	128.041	0.00033	0.01956	0.94044	0.03857	0.00109	0	44.781	654.837	0.016	440.967	1.41961	110.012	0.55598	0	0	0.00557	0.23957	0.75486	0	-0.04523	0	0.00709	0.67064	0.32228	0	0	-0.03686	0.00152	0.01236	0.66385	0.32202	0.00026	0
2	01:09:02	LD222_(tall_wheat)	LD222_recurrent_parent_(tall)	KH2PO4	2021-03-19 15:01:38	128659	0.21072	0	0	0.05156	0.94809	0.00035	0	151.621	164.463	126.911	0.00058	0.01996	0.90777	0.07014	0.00154	0	42.732	848.553	0.021	535.883	1.47366	114.698	0.44353	0	0	0.02349	0.5107	0.46581	0	-0.00478	0	0.00075	0.51484	0.48195	0.00246	0	-0.0286	0.00311	0.01579	0.49669	0.48441	0	0
2	01:09:03	LD222_(tall_wheat)	LD222_recurrent_parent_(tall)	KH2PO4	2021-03-19 15:01:38	77453.9	0.23831	0.00063	0.00106	0.04749	0.94584	0.00497	0	105.229	118.006	124.202	0	0.06982	0.84239	0.08239	0.0054	0	37.126	736.049	0.018	426.405	1.65674	47.921	0.45236	0.00154	0.00229	0.03761	0.43471	0.52385	0	-0.00091	0	0.01241	0.5041	0.48209	0.0014	0	-0.02454	0.00924	0.0207	0.48657	0.47823	0.0048	0.00046
1	02:01:01	Chulpan_(rye)	S._cereale_Chulpan	w/o_P	2021-03-19 15:28:40	58356.9	0.15736	0	0	0.02526	0.97474	0	0	141.312	169.843	140.755	0	0.01009	0.89631	0.09251	0.00109	0	9.363	412.965	0.01	51.739	6.14496	108.731	0.45083	0	0	0	0.63017	0.36983	0	-0.06827	0	0	0.8159	0.1841	0	0	-0.06351	0	0	0.8159	0.1841	0	0
1	02:01:02	Chulpan_(rye)	S._cereale_Chulpan	w/o_P	2021-03-19 15:28:40	50028.9	0.12099	0	0	0.02276	0.97724	0	0	163.253	184.648	158.367	0	0.007	0.833	0.15885	0.00115	0	9.518	306.45	0.008	44.8	6.04575	96.364	0.37445	0	0	0.00973	0.72923	0.26104	0	-0.11244	0	0	0.94878	0.05002	0.0012	0	-0.1112	0	0	0.94878	0.04939	0.00064	0.0012
1	02:01:03	Chulpan_(rye)	S._cereale_Chulpan	w/o_P	2021-03-19 15:28:40	24574.1	0.20782	0	0	0.0173	0.9827	0	0	102.672	97.656	137.58	0	0.03575	0.87833	0.08342	0.0025	0	13.407	239.346	0.006	48.345	4.31213	60.029	0.4988	0	0	0.00106	0.479	0.51995	0	-0.06513	0	0	0.81796	0.18204	0	0	-0.05087	0	0	0.81796	0.18204	0	0
1	02:02:01	LD222_Rht17_NIL	T._durum_LD222_Rht17_NIL	w/o_P	2021-03-19 15:28:40	33820.7	0.10924	0	0	0.09116	0.90884	0	0	156.852	122.355	156.401	0	0.01263	0.68033	0.30596	0.00108	0	11.12	215.622	0.005	35.364	5.18412	125.976	0.41192	0	0	0.00773	0.73527	0.25699	0	-0.1102	0	0.00299	0.84704	0.14997	0	0	-0.10956	0	0.00982	0.84022	0.14997	0	0
1	02:02:02	LD222_Rht17_NIL	T._durum_LD222_Rht17_NIL	w/o_P	2021-03-19 15:28:40	118667	0.14906	0	0	0.03882	0.96118	0	0	184.905	205.418	154.923	0	0.00599	0.84206	0.15125	0.0007	0	16.947	641.775	0.016	170.656	3.43027	132.565	0.43789	0	0	0.01488	0.55545	0.42967	0	-0.11843	0	0.00041	0.91341	0.08618	0	0	-0.10582	0	0	0.91382	0.08618	0	0
1	02:02:03	LD222_Rht17_NIL	T._durum_LD222_Rht17_NIL	w/o_P	2021-03-19 15:28:40	49840.5	0.20103	0	0	0.00825	0.99175	0	0	182.721	194.709	139.368	0	0.0102	0.95881	0.03098	0	0	10.55	272.768	0.007	31.661	5.46026	122.732	0.55953	0	0	0	0.28313	0.71687	0	-0.09706	0	0	0.87304	0.12696	0	0	-0.05634	0	0	0.87304	0.12696	0	0
1	02:03:01	LD222_(tall_wheat)	LD222_recurrent_parent_(tall)	w/o_P	2021-03-19 15:28:40	121294	0.17073	0	0	0.0154	0.9846	0	0	232.619	268.112	150.512	0	0.01112	0.83567	0.15321	0	0	18.318	521.426	0.013	150.592	3.18138	132.536	0.53666	0	0	0.0018	0.28861	0.70959	0	-0.12286	0	0	0.90409	0.09591	0	0	-0.09058	0	0	0.90409	0.09591	0	0
1	02:03:02	LD222_(tall_wheat)	LD222_recurrent_parent_(tall)	w/o_P	2021-03-19 15:28:40	163130	0.2062	0	0.00046	0.02973	0.96981	0	0	226.492	248.156	140.769	0	0.01608	0.88278	0.10041	0.00073	0	29.048	720.246	0.018	346.123	2.05941	154.786	0.47942	0	0	0.02802	0.40111	0.57087	0	-0.07469	0	0	0.76733	0.23267	0	0	-0.07579	0.00083	0.01291	0.75359	0.23267	0	0
1	02:03:03	LD222_(tall_wheat)	LD222_recurrent_parent_(tall)	w/o_P	2021-03-19 15:28:40	259486	0.23422	0	0	0.03113	0.95537	0.01351	0	236.389	259.276	136.316	0	0.01893	0.92307	0.05418	0.00382	0	27.902	1097.71	0.027	474.083	2.13681	146.603	0.53239	0.00132	0.00043	0.0152	0.31037	0.67269	0	-0.0845	0	0.00032	0.80132	0.19561	0.00275	0	-0.05774	0.00037	0.00585	0.79583	0.19676	0.00119	0
1	02:04:01	Chulpan_(rye)	S._cereale_Chulpan	Phosphorite	2021-03-19 15:28:40	88577.8	0.10734	0	0	0.06989	0.93011	0	0	146.895	183.51	166.13	0	0.0017	0.67327	0.32443	0.0006	0	12.183	603	0.015	117.403	4.73754	105.563	0.40421	0	0	0.00062	0.78234	0.21704	0	-0.13847	0	0	0.94918	0.05082	0	0	-0.14319	0	0	0.94918	0.05082	0	0
1	02:04:02	Chulpan_(rye)	S._cereale_Chulpan	Phosphorite	2021-03-19 15:28:40	134107	0.17222	0	0	0.00617	0.99383	0	0	146.606	192.246	147.505	0	0.00396	0.93058	0.06546	0	0	16.941	914.744	0.023	247.848	3.43148	107.403	0.46536	0	0	0.0062	0.59645	0.39735	0	-0.10856	0	0	0.93539	0.06461	0	0	-0.08886	0	0	0.93539	0.06461	0	0
1	02:04:03	Chulpan_(rye)	S._cereale_Chulpan	Phosphorite	2021-03-19 15:28:40	52309.3	0.21092	0	0	0.02198	0.97435	0.00367	0	132.485	159.724	127.071	0	0.02741	0.9292	0.04249	0.00089	0	11.808	394.832	0.01	65.214	4.88577	96.353	0.47164	0	0	0.00543	0.53	0.46457	0	-0.0181	0	0.00101	0.60808	0.3901	0.00081	0	-0.01675	0	0	0.60909	0.39091	0	0
1	02:05:01	LD222_Rht17_NIL	T._durum_LD222_Rht17_NIL	Phosphorite	2021-03-19 15:28:40	74011.7	0.15404	0	0	0.05267	0.94733	0	0	186.948	207.361	150.02	0	0.00956	0.82333	0.16711	0	0	9.437	395.894	0.01	51.256	6.09764	122.468	0.48812	0	0	0	0.49899	0.50101	0	-0.10231	0	0	0.85699	0.14301	0	0	-0.08957	0	0	0.85699	0.14301	0	0
1	02:05:02	LD222_Rht17_NIL	T._durum_LD222_Rht17_NIL	Phosphorite	2021-03-19 15:28:40	102382	0.11993	0	0	0.03861	0.96139	0	0	186.284	205.469	163.765	0	0.00279	0.79921	0.198	0	0	15.885	549.602	0.014	146.484	3.65311	99.697	0.40415	0	0	0.01453	0.62588	0.35959	0	-0.13874	0	0	0.96844	0.03156	0	0	-0.12951	0	0	0.96844	0.03156	0	0
1	02:05:03	LD222_Rht17_NIL	T._durum_LD222_Rht17_NIL	Phosphorite	2021-03-19 15:28:40	60826.3	0.21376	0	0	0.01388	0.98526	0.00085	0	166.523	199.764	137.731	0	0.00916	0.95872	0.02981	0.00231	0	10.853	365.272	0.009	47.024	5.30966	109.577	0.57649	0	0	0	0.22578	0.77422	0	-0.08538	0	0	0.82755	0.17245	0	0	-0.04528	0	0	0.82755	0.17245	0	0
1	02:06:01	LD222_(tall_wheat)	LD222_recurrent_parent_(tall)	Phosphorite	2021-03-19 15:28:40	202160	0.15419	0	0.00234	0.15036	0.8447	0.0026	0	221.873	237.215	156.51	0.00021	0.01607	0.68662	0.2915	0.00561	0	27.103	911.153	0.022	404.48	2.19484	146.223	0.46091	0.00057	0.00038	0.04255	0.44881	0.50768	0	-0.13184	0	0.02476	0.79762	0.17762	0	0	-0.14013	0.00383	0.05413	0.76442	0.17762	0	0
1	02:06:02	LD222_(tall_wheat)	LD222_recurrent_parent_(tall)	Phosphorite	2021-03-19 15:28:40	85112.3	0.17438	0	0.00035	0.02992	0.96973	0	0	131.051	134.227	137.027	0	0.03606	0.87783	0.08462	0.00149	0	37.653	649.461	0.016	392.796	1.63694	106.215	0.44189	0	0	0.01602	0.51095	0.47303	0	-0.06106	0	0	0.75814	0.24186	0	0	-0.0486	0	0.00035	0.7578	0.24186	0	0
1	02:06:03	LD222_(tall_wheat)	LD222_recurrent_parent_(tall)	Phosphorite	2021-03-19 15:28:40	59811.3	0.21787	0	0	0.02247	0.97319	0.00435	0	137.93	150.63	129.311	0.00062	0.01993	0.90099	0.07426	0.0042	0	31.65	433.636	0.011	224.954	1.90566	104.45	0.51532	0	0	0.01624	0.30835	0.6754	0	-0.03309	0	0	0.61393	0.38536	0.00071	0	-0.03121	0	0	0.61393	0.38536	0.00071	0
1	02:07:01	Chulpan_(rye)	S._cereale_Chulpan	KH2PO4	2021-03-19 15:28:40	64607.3	0.18576	0	0	0.01992	0.98008	0	0	136.242	148.935	141.064	0	0.00324	0.91239	0.08329	0.00108	0	16.909	474.21	0.012	130.477	3.43776	82.781	0.49996	0	0	0.00189	0.39545	0.60266	0	-0.06842	0	0	0.77244	0.22756	0	0	-0.06097	0	0.00249	0.76995	0.22756	0	0
1	02:07:02	Chulpan_(rye)	S._cereale_Chulpan	KH2PO4	2021-03-19 15:28:40	71994.8	0.18541	0	0	0	1	0	0	131.167	146.277	136.905	0	0.00269	0.97814	0.01917	0	0	16.097	548.877	0.014	145.837	3.6062	85.583	0.49051	0	0	0	0.52355	0.47645	0	-0.06861	0	0	0.84518	0.15482	0	0	-0.05455	0	0	0.84518	0.15482	0	0
1	02:07:03	Chulpan_(rye)	S._cereale_Chulpan	KH2PO4	2021-03-19 15:28:40	209943	0.27011	0	0	0.02265	0.95019	0.02716	0	191.156	218.296	120.243	0.00021	0.03118	0.92256	0.04492	0.00114	0	31.759	1098.28	0.027	537.333	1.89977	161.286	0.53109	0	0	0.02081	0.30742	0.67176	0	0.01707	0.00023	0.00033	0.46325	0.5305	0.00569	0	0.00814	0	0.00296	0.46085	0.53153	0.0028	0.00186
1	02:08:01	LD222_Rht17_NIL	T._durum_LD222_Rht17_NIL	KH2PO4	2021-03-19 15:28:40	109713	0.20211	0	0	0.03238	0.96762	0	0	176.998	199.058	140.505	0	0.00899	0.88551	0.1055	0	0	10.644	619.855	0.015	90.121	5.41272	121.843	0.53452	0	0	0	0.32607	0.67393	0	-0.08076	0	0	0.78295	0.21705	0	0	-0.06086	0	0	0.78295	0.21705	0	0
1	02:08:02	LD222_Rht17_NIL	T._durum_LD222_Rht17_NIL	KH2PO4	2021-03-19 15:28:40	134144	0.21049	0	0	0.01569	0.98431	0	0	148.778	191.434	141.094	0	0.00778	0.8884	0.10352	0.00031	0	17.906	901.64	0.022	278.839	3.25219	100.919	0.4983	0	0	0.01418	0.42424	0.56157	0	-0.0915	0	0	0.86842	0.13158	0	0	-0.07122	0.00034	0.00067	0.86741	0.13135	0.00023	0
1	02:08:03	LD222_Rht17_NIL	T._durum_LD222_Rht17_NIL	KH2PO4	2021-03-19 15:28:40	106951	0.24339	0	0	0.04608	0.94843	0.00549	0	160.446	190.978	134.609	0	0.02369	0.89768	0.07786	0.00078	0	19.187	666.584	0.016	211.473	3.04235	103.856	0.53143	0	0	0.01883	0.33444	0.64673	0	-0.06233	0	0.00064	0.74878	0.24959	0.00099	0	-0.04573	0	0.00113	0.74829	0.25016	0.00042	0
1	02:09:01	LD222_(tall_wheat)	LD222_recurrent_parent_(tall)	KH2PO4	2021-03-19 15:28:40	156321	0.18669	0	0.00207	0.10457	0.8903	0.00307	0	150.388	187.681	151.316	0	0.02248	0.77156	0.20203	0.00393	0	33.482	1039.45	0.026	526.029	1.81258	78.645	0.5393	0	0	0.0195	0.29207	0.68843	0	-0.14067	0	0.02132	0.8179	0.1604	0.00039	0	-0.12231	0.0019	0.03965	0.79766	0.16078	0	0
1	02:09:02	LD222_(tall_wheat)	LD222_recurrent_parent_(tall)	KH2PO4	2021-03-19 15:28:40	143311	0.23758	0	0.0007	0.03277	0.96652	0	0	157.063	188.23	128.243	0	0.01793	0.92265	0.05511	0.00431	0	35.454	912.443	0.023	515.315	1.7239	88.9	0.48824	0	0	0.02477	0.36648	0.60876	0	-0.01637	0	0	0.57592	0.42408	0	0	-0.03017	0.00157	0.00575	0.56859	0.42359	0.0005	0
1	02:09:03	LD222_(tall_wheat)	LD222_recurrent_parent_(tall)	KH2PO4	2021-03-19 15:28:40	129935	0.25574	0	0	0.01679	0.97707	0.00614	0	166.849	168.847	125.279	0	0.03255	0.93679	0.02963	0.00103	0	36.699	778.761	0.019	448.067	1.67327	140.638	0.57717	0	0	0.00236	0.26676	0.73088	0	-0.02254	0	0	0.6379	0.36127	0.00083	0	-0.01169	0	0	0.6379	0.3621	0	0
2	02:01:01	Chulpan_(rye)	S._cereale_Chulpan	w/o_P	2021-03-19 15:40:07	51464.2	0.17505	0	0	0.01233	0.98767	0	0	144.288	165.343	143.213	0	0.01602	0.82472	0.15926	0	0	10.24	356.677	0.009	51.43	5.62401	83.535	0.472	0	0	0.00371	0.58535	0.41094	0	-0.07753	0	0	0.77796	0.22204	0	0	-0.0797	0	0	0.77796	0.22204	0	0
2	02:01:02	Chulpan_(rye)	S._cereale_Chulpan	w/o_P	2021-03-19 15:40:07	73870.9	0.10845	0	0	0.04491	0.95509	0	0	175.137	205.982	157.12	0	0.01194	0.76518	0.22289	0	0	8.146	421.788	0.01	49.306	7.05538	113.866	0.34419	0	0	0.00364	0.83644	0.15993	0	-0.09174	0	0	0.89639	0.10361	0	0	-0.09976	0	0	0.89639	0.10361	0	0
2	02:01:03	Chulpan_(rye)	S._cereale_Chulpan	w/o_P	2021-03-19 15:40:07	15713.9	0.18496	0	0	0.01788	0.98212	0	0	92.247	95.132	132.815	0	0.01409	0.9278	0.05184	0.00628	0	10.751	170.345	0.004	21.756	5.35946	57.095	0.4761	0	0	0.00196	0.60048	0.39756	0	-0.0479	0	0	0.73545	0.26455	0	0	-0.03528	0	0	0.73545	0.26455	0	0
2	02:02:01	LD222_Rht17_NIL	T._durum_LD222_Rht17_NIL	w/o_P	2021-03-19 15:40:07	42882.1	0.16087	0	0	0.01639	0.98361	0	0	158.389	182.247	151.947	0	0.00516	0.88126	0.11359	0	0	10.967	270.74	0.007	40.234	5.25514	91.348	0.53618	0	0	0	0.3883	0.6117	0	-0.12238	0	0	0.92958	0.07042	0	0	-0.09026	0	0	0.92958	0.07042	0	0
2	02:02:02	LD222_Rht17_NIL	T._durum_LD222_Rht17_NIL	w/o_P	2021-03-19 15:40:07	110434	0.16074	0	0	0.01997	0.98003	0	0	163.524	193.359	154.234	0	0.00829	0.81225	0.17947	0	0	14.767	675.337	0.017	161.389	3.92262	117.188	0.48059	0	0	0.00729	0.53464	0.45807	0	-0.13251	0	0	0.93767	0.06233	0	0	-0.10867	0	0	0.93767	0.06233	0	0
2	02:02:03	LD222_Rht17_NIL	T._durum_LD222_Rht17_NIL	w/o_P	2021-03-19 15:40:07	48529	0.15506	0	0	0.03066	0.96934	0	0	175.087	166.282	154.104	0	0.0061	0.86185	0.13206	0	0	9.986	277.171	0.007	32.576	5.76515	100.254	0.46187	0	0	0	0.50678	0.49322	0	-0.12958	0	0	0.9318	0.0682	0	0	-0.11067	0	0	0.9318	0.0682	0	0
2	02:03:01	LD222_(tall_wheat)	LD222_recurrent_parent_(tall)	w/o_P	2021-03-19 15:40:07	113379	0.18135	0	0	0.13822	0.85721	0.00456	0	251.075	261.557	148.914	0	0.01059	0.74474	0.24466	0	0	20.702	451.575	0.011	156.137	2.8285	159.163	0.53018	0	0	0.01204	0.31545	0.67251	0	-0.10799	0	0.02191	0.74337	0.23473	0	0	-0.11064	0	0.06592	0.69935	0.23473	0	0
2	02:03:02	LD222_(tall_wheat)	LD222_recurrent_parent_(tall)	w/o_P	2021-03-19 15:40:07	212054	0.20047	0.00102	0.00249	0.04469	0.95146	0.00034	0	196.835	215.587	145.29	0	0.011	0.89216	0.09304	0.0038	0	29.007	1077.32	0.027	506.271	2.06211	131.759	0.48367	0	0.00173	0.02378	0.39057	0.58393	0	-0.11228	0.00125	0.00252	0.90039	0.09584	0	0	-0.11158	0.00536	0.01242	0.88619	0.09522	0.00081	0
2	02:03:03	LD222_(tall_wheat)	LD222_recurrent_parent_(tall)	w/o_P	2021-03-19 15:40:07	197160	0.25176	0	0.00032	0.02789	0.96795	0.00384	0	223.339	254.933	130.698	0	0.0237	0.915	0.06035	0.00095	0	26.945	882.782	0.022	389.941	2.20668	148.68	0.52446	0.00134	0	0.02628	0.31176	0.66062	0	-0.04658	0	0.00081	0.71254	0.28482	0.00183	0	-0.03182	0.00026	0.0106	0.70286	0.28161	0.00379	0.00088
2	02:04:01	Chulpan_(rye)	S._cereale_Chulpan	Phosphorite	2021-03-19 15:40:07	66516.1	0.15726	0	0	0.01864	0.98136	0	0	136.992	147.941	145.953	0.00043	0.00536	0.88277	0.11029	0.00115	0	9.819	485.546	0.012	65.362	5.86235	95.818	0.46278	0	0	0.00084	0.63948	0.35968	0	-0.09108	0	0	0.87568	0.12432	0	0	-0.08007	0	0	0.87568	0.12432	0	0
2	02:04:02	Chulpan_(rye)	S._cereale_Chulpan	Phosphorite	2021-03-19 15:40:07	183428	0.17617	0	0	0.01171	0.9877	0.0006	0	176.635	218.849	147.223	0	0.00591	0.91054	0.08336	0.00018	0	19.986	1038.46	0.026	321.941	2.92543	128.038	0.48296	0	0	0.00232	0.51664	0.48105	0	-0.10335	0	0	0.91409	0.08591	0	0	-0.08446	0	0	0.91409	0.08591	0	0
2	02:04:03	Chulpan_(rye)	S._cereale_Chulpan	Phosphorite	2021-03-19 15:40:07	58587.6	0.2009	0	0	0.01364	0.98636	0	0	125.242	131.051	130.447	0	0.0133	0.9478	0.03778	0.00112	0	11.447	467.795	0.012	69.334	5.03761	73.127	0.50622	0	0	0.00343	0.44409	0.55248	0	-0.03895	0	0	0.65909	0.34091	0	0	-0.0255	0	0	0.65909	0.34091	0	0
2	02:05:01	LD222_Rht17_NIL	T._durum_LD222_Rht17_NIL	Phosphorite	2021-03-19 15:40:07	81051.5	0.1324	0	0	0.03958	0.96042	0	0	157.253	179.323	161.531	0	0.00977	0.72321	0.26539	0.00163	0	10.693	515.422	0.013	76.645	5.38822	115.007	0.46917	0	0	0.00157	0.58238	0.41605	0	-0.14167	0	0	0.90718	0.09282	0	0	-0.12604	0	0.00246	0.90472	0.09282	0	0
2	02:05:02	LD222_Rht17_NIL	T._durum_LD222_Rht17_NIL	Phosphorite	2021-03-19 15:40:07	100513	0.12682	0	0	0.04471	0.95529	0	0	178.048	204.416	163.316	0	0.0061	0.76129	0.23152	0.00109	0	12.057	564.527	0.014	100.869	4.78659	102.932	0.45227	0	0	0.00571	0.59999	0.39431	0	-0.14719	0	0	0.96596	0.03404	0	0	-0.12762	0	0	0.96596	0.03404	0	0
2	02:05:03	LD222_Rht17_NIL	T._durum_LD222_Rht17_NIL	Phosphorite	2021-03-19 15:40:07	46741.4	0.1444	0	0	0.0575	0.9425	0	0	176.851	188.773	152.346	0	0.04154	0.78031	0.17815	0	0	10.439	264.298	0.007	35.532	5.51795	108.862	0.49081	0	0	0	0.52296	0.47704	0	-0.10984	0	0	0.8513	0.1487	0	0	-0.08737	0	0	0.8513	0.1487	0	0
2	02:06:01	LD222_(tall_wheat)	LD222_recurrent_parent_(tall)	Phosphorite	2021-03-19 15:40:07	149323	0.11376	0	0.00106	0.09394	0.905	0	0	225.717	243.757	167.622	0	0.00739	0.69312	0.29398	0.00551	0	26.961	661.548	0.016	293.22	2.20547	132.962	0.40545	0	0.00105	0.01344	0.66992	0.31559	0	-0.15479	0	0.00216	0.95862	0.03922	0	0	-0.15249	0.00104	0.01477	0.94497	0.03673	0.00249	0
2	02:06:02	LD222_(tall_wheat)	LD222_recurrent_parent_(tall)	Phosphorite	2021-03-19 15:40:07	124144	0.20836	0	0	0.02456	0.97544	0	0	124.261	256.895	135.787	0	0.02206	0.90348	0.07233	0.00213	0	37.342	999.057	0.025	598.931	1.64853	98.975	0.50845	0	0.00038	0.00626	0.39251	0.60085	0	-0.0638	0	0.00022	0.72186	0.27754	0.00038	0	-0.05304	0	0.00146	0.72063	0.27723	0.00031	0.00038
2	02:06:03	LD222_(tall_wheat)	LD222_recurrent_parent_(tall)	Phosphorite	2021-03-19 15:40:07	96991.3	0.24466	0	0	0.02812	0.96948	0.0024	0	123.245	144.09	134.263	0	0.04222	0.89589	0.06009	0.0018	0	37.783	786.981	0.019	464.1	1.63213	48.658	0.55683	0	0	0.01561	0.26153	0.72286	0	-0.08054	0	0.00781	0.75956	0.23231	0.00032	0	-0.04535	0.00025	0.00505	0.76207	0.23218	0.00045	0
2	02:07:01	Chulpan_(rye)	S._cereale_Chulpan	KH2PO4	2021-03-19 15:40:07	112497	0.17355	0	0	0.01792	0.98208	0	0	130.668	148.756	139.686	0	0.00744	0.89318	0.09938	0	0	11.587	860.938	0.021	133.235	4.97757	92.421	0.48767	0	0	0.00075	0.47454	0.52471	0	-0.06888	0	0	0.77181	0.22819	0	0	-0.06158	0	0.00031	0.7715	0.22744	0.00075	0
2	02:07:02	Chulpan_(rye)	S._cereale_Chulpan	KH2PO4	2021-03-19 15:40:07	89283.8	0.14314	0	0	0.00219	0.99781	0	0	139.898	158.498	151.585	0	0.00635	0.86273	0.13092	0	0	17.193	638.207	0.016	167.191	3.38272	94.077	0.44241	0	0	0.00094	0.63642	0.36265	0	-0.10825	0	0	0.9257	0.0743	0	0	-0.09656	0	0	0.9257	0.0743	0	0
2	02:07:03	Chulpan_(rye)	S._cereale_Chulpan	KH2PO4	2021-03-19 15:40:07	186955	0.2478	0	0	0.02145	0.96462	0.01394	0	187.043	204.958	122.227	0	0.027	0.9274	0.04152	0.00409	0	34.672	999.528	0.025	519.792	1.7578	163.078	0.53905	0	0	0.02039	0.29995	0.67966	0	0.00387	0	0.00022	0.50712	0.49266	0	0	-0.00388	0	0.00033	0.50701	0.49165	0.00101	0
2	02:08:01	LD222_Rht17_NIL	T._durum_LD222_Rht17_NIL	KH2PO4	2021-03-19 15:40:07	118283	0.15234	0	0.00065	0.10204	0.89731	0	0	173.811	217.527	158.411	0	0.00739	0.69608	0.2959	0.00063	0	11.052	680.525	0.017	100.538	5.21522	139.648	0.48715	0	0	0	0.54144	0.45856	0	-0.12485	0	0.00065	0.85767	0.14169	0	0	-0.11618	0.00065	0.00415	0.85352	0.14169	0	0
2	02:08:02	LD222_Rht17_NIL	T._durum_LD222_Rht17_NIL	KH2PO4	2021-03-19 15:40:07	153150	0.20992	0	0	0.00972	0.99028	0	0	156.883	188.101	144.322	0	0.00304	0.92267	0.07429	0	0	18.374	976.205	0.024	274.329	3.17202	110.388	0.55218	0	0	0.00157	0.2802	0.71823	0	-0.11958	0	0	0.89217	0.10783	0	0	-0.08009	0	0	0.89217	0.10783	0	0
2	02:08:03	LD222_Rht17_NIL	T._durum_LD222_Rht17_NIL	KH2PO4	2021-03-19 15:40:07	98049.8	0.25548	0	0	0.00845	0.98078	0.01077	0	161.195	170.013	128.614	0	0.01879	0.94745	0.03376	0	0	16.593	608.267	0.015	156.709	3.50132	95.998	0.55606	0	0	0.00401	0.25046	0.74553	0	-0.02663	0	0	0.63325	0.36502	0.00173	0	-0.0162	0	0	0.63325	0.36585	0.0009	0
2	02:09:01	LD222_(tall_wheat)	LD222_recurrent_parent_(tall)	KH2PO4	2021-03-19 15:40:07	130693	0.22973	0	0.00054	0.08945	0.90633	0.00367	0	152.419	188.192	139.165	0	0.02709	0.79031	0.18005	0.00255	0	31.069	857.459	0.021	421.42	1.93762	95.823	0.55726	0	0	0.00913	0.26126	0.72961	0	-0.07431	0	0.01635	0.60475	0.3789	0	0	-0.07757	0.00169	0.02806	0.59135	0.3789	0	0
2	02:09:02	LD222_(tall_wheat)	LD222_recurrent_parent_(tall)	KH2PO4	2021-03-19 15:40:07	178331	0.25002	0	0.00015	0.02275	0.9771	0	0	138.384	151.782	132.568	0	0.01695	0.93724	0.0447	0.00112	0	34.521	1288.66	0.032	688.537	1.7645	76.947	0.5509	0	0	0.00683	0.2567	0.73646	0	-0.06417	0	0.00397	0.73415	0.26188	0	0	-0.05237	0.00295	0.01126	0.72392	0.2616	0.00028	0
2	02:09:03	LD222_(tall_wheat)	LD222_recurrent_parent_(tall)	KH2PO4	2021-03-19 15:40:07	153531	0.23664	0	0	0.0337	0.95212	0.01419	0	163.564	186.133	132.293	0	0.01949	0.90308	0.07573	0.0017	0	35.985	938.655	0.023	502.22	1.70183	135.021	0.54819	0	0	0.01488	0.25746	0.72767	0	-0.05	0	0.0017	0.71021	0.28785	0.00023	0	-0.04021	0	0.00264	0.70927	0.28759	0.0005	0
1	01:01:01	Chulpan_(rye)	S._cereale_Chulpan	w/o_P	2021-03-22 15:02:39	139566	0.09852	0	0	0.0558	0.9442	0	0	180.097	223.427	169.331	0	0.00456	0.68599	0.30945	0	0	12.781	774.95	0.019	161.922	4.51934	119.622	0.38441	0	0	0.00185	0.8831	0.11505	0	-0.14356	0	0.0005	0.96942	0.03008	0	0	-0.1519	0	0.00185	0.96807	0.03008	0	0
1	01:01:02	Chulpan_(rye)	S._cereale_Chulpan	w/o_P	2021-03-22 15:02:39	135049	0.19011	0	0	0.00827	0.99173	0	0	143.49	192.035	143.567	0	0.00437	0.94496	0.05067	0	0	23.199	941.172	0.023	370.113	2.53838	103.467	0.51075	0	0	0.00303	0.37882	0.61815	0	-0.10507	0	0	0.92496	0.07504	0	0	-0.07585	0	0	0.92496	0.07406	0.00098	0
1	01:01:03	Chulpan_(rye)	S._cereale_Chulpan	w/o_P	2021-03-22 15:02:39	55522.7	0.21716	0	0	0	1	0	0	152.886	164.388	130.65	0	0.00699	0.98509	0.00792	0	0	13.134	363.165	0.009	70.532	4.40002	97.688	0.54247	0	0	0	0.36743	0.63257	0	-0.05443	0	0	0.76668	0.23332	0	0	-0.03273	0	0	0.76668	0.23332	0	0
1	01:02:01	LD222_Rht17_NIL	T._durum_LD222_Rht17_NIL	w/o_P	2021-03-22 15:02:39	134833	0.15544	0	0	0.02679	0.97321	0	0	185.871	203.651	157.619	0	0.00046	0.80082	0.19716	0.00156	0	18.454	725.411	0.018	213.927	3.15884	119.941	0.50297	0	0	0.00181	0.3553	0.64289	0	-0.14524	0	0	0.94867	0.05133	0	0	-0.11688	0	0.001	0.94766	0.05133	0	0
1	01:02:02	LD222_Rht17_NIL	T._durum_LD222_Rht17_NIL	w/o_P	2021-03-22 15:02:39	142011	0.13448	0	0	0.02696	0.97304	0	0	181.16	222.31	161.267	0	0.00344	0.7534	0.24288	0.00028	0	11.886	783.895	0.019	165.982	4.85421	126.631	0.4382	0	0	0.01181	0.54462	0.44356	0	-0.14156	0	0	0.95536	0.04464	0	0	-0.12885	0	0	0.95536	0.04464	0	0
1	01:02:03	LD222_Rht17_NIL	T._durum_LD222_Rht17_NIL	w/o_P	2021-03-22 15:02:39	145172	0.2495	0	0	0.00744	0.99031	0.00225	0	176.921	226.227	135.695	0	0.00968	0.97372	0.0166	0	0	15.546	820.55	0.02	213.878	3.7307	119.425	0.59638	0	0	0.00793	0.18719	0.80489	0	-0.09648	0	0	0.87045	0.12911	0.00044	0	-0.04982	0	0	0.87045	0.12811	0.00144	0
1	01:03:01	LD222_(tall_wheat)	LD222_recurrent_parent_(tall)	w/o_P	2021-03-22 15:02:39	174443	0.21187	0	0	0.0133	0.98634	0.00036	0	187.048	224.598	137.455	0	0.02159	0.91303	0.06398	0.0014	0	21.672	932.607	0.023	314.244	2.70767	110.095	0.50843	0	0	0.00156	0.37904	0.6194	0	-0.05902	0	0	0.72798	0.27202	0	0	-0.05169	0	0	0.72798	0.27202	0	0
1	01:03:02	LD222_(tall_wheat)	LD222_recurrent_parent_(tall)	w/o_P	2021-03-22 15:02:39	248483	0.18411	0	0	0.03117	0.96883	0	0	224.19	257.098	146.292	0.00027	0.006	0.86638	0.12622	0.00114	0	20.195	1108.35	0.027	365.058	2.89643	143.967	0.47704	0	0	0.00838	0.45743	0.53419	0	-0.09532	0	0	0.90033	0.09929	0.00038	0	-0.08469	0.00044	0.00043	0.89945	0.09907	0.0006	0
1	01:03:03	LD222_(tall_wheat)	LD222_recurrent_parent_(tall)	w/o_P	2021-03-22 15:02:39	154492	0.19939	0	0	0.07211	0.92582	0.00207	0	204.655	228.205	139.288	0	0.03675	0.80241	0.15543	0.00541	0	27.418	754.889	0.019	322.164	2.17148	116.365	0.46696	0	0	0.03935	0.41951	0.54114	0	-0.05837	0	0.00132	0.72649	0.27084	0.00135	0	-0.06485	0	0.00483	0.72297	0.27187	0.00032	0
1	01:04:01	Chulpan_(rye)	S._cereale_Chulpan	Phosphorite	2021-03-22 15:02:39	87036.6	0.21789	0	0	0.00263	0.99693	0.00044	0	150.664	182.563	135.054	0.00094	0.01108	0.96973	0.01824	0	0	16.506	577.687	0.014	144.237	3.51916	103.924	0.56375	0	0	0	0.29179	0.70821	0	-0.07287	0	0	0.85503	0.14497	0	0	-0.04528	0	0	0.85503	0.14497	0	0
1	01:04:02	Chulpan_(rye)	S._cereale_Chulpan	Phosphorite	2021-03-22 15:02:39	157295	0.18268	0	0	0.00544	0.99456	0	0	173.272	206.733	141.263	0	0.00588	0.94337	0.05075	0	0	16.038	907.793	0.022	236.253	3.619	137.157	0.49187	0	0.00056	0.00254	0.52751	0.46939	0	-0.08541	0	0	0.82512	0.17488	0	0	-0.06298	0	0	0.82512	0.17488	0	0
1	01:04:03	Chulpan_(rye)	S._cereale_Chulpan	Phosphorite	2021-03-22 15:02:39	124956	0.15826	0	0	0.02819	0.97181	0	0	160.288	171.653	146.106	0	0.0104	0.88385	0.10302	0.00273	0	19.419	779.574	0.019	246.162	3.00741	93.093	0.46798	0	0	0.0235	0.49629	0.48022	0	-0.09134	0	0	0.86759	0.13241	0	0	-0.06862	0	0	0.86759	0.13241	0	0
1	01:05:01	LD222_Rht17_NIL	T._durum_LD222_Rht17_NIL	Phosphorite	2021-03-22 15:02:39	69482.2	0.10188	0	0	0.09534	0.90466	0	0	201.327	232.763	173.961	0	0	0.61991	0.38009	0	0	10.341	345.121	0.009	58.42	5.56968	105.025	0.45317	0	0	0	0.6681	0.3319	0	-0.19261	0	0.00753	0.97711	0.01536	0	0	-0.18593	0	0.01433	0.97031	0.01536	0	0
1	01:05:02	LD222_Rht17_NIL	T._durum_LD222_Rht17_NIL	Phosphorite	2021-03-22 15:02:39	116344	0.11458	0	0	0.03616	0.96384	0	0	183.099	235.891	165.404	0	0.00258	0.76397	0.23133	0.00211	0	10.756	635.417	0.016	106.569	5.35702	132.022	0.43072	0	0	0.00765	0.64551	0.34684	0	-0.14611	0	0	0.97105	0.02895	0	0	-0.13536	0	0	0.97105	0.02895	0	0
1	01:05:03	LD222_Rht17_NIL	T._durum_LD222_Rht17_NIL	Phosphorite	2021-03-22 15:02:39	138148	0.19043	0	0	0.02681	0.97268	0.00051	0	201.396	213.96	146.348	0	0.00727	0.8989	0.09383	0	0	9.27	685.953	0.017	72.182	6.2064	140.394	0.53072	0	0	0.00301	0.31434	0.68264	0	-0.11423	0	0	0.92269	0.07731	0	0	-0.08011	0	0.00077	0.92192	0.07731	0	0
1	01:06:01	LD222_(tall_wheat)	LD222_recurrent_parent_(tall)	Phosphorite	2021-03-22 15:02:39	178975	0.12255	0	0	0.05429	0.94571	0	0	209.038	228.762	166.713	0	0.008	0.73112	0.25861	0.00226	0	24.377	856.183	0.021	343.225	2.42265	131.275	0.47961	0	0	0.00267	0.45252	0.54481	0	-0.16323	0	0	0.93662	0.06338	0	0	-0.13605	0	0.00235	0.93427	0.06338	0	0
1	01:06:02	LD222_(tall_wheat)	LD222_recurrent_parent_(tall)	Phosphorite	2021-03-22 15:02:39	280649	0.16886	0	0.00018	0.01702	0.9828	0	0	212.106	253.904	150.68	0	0.0095	0.90613	0.08416	0.00021	0	23.628	1323.16	0.033	495.379	2.49488	139.274	0.50422	0	0	0.00289	0.38451	0.6126	0	-0.12343	0	0.00082	0.9236	0.07558	0	0	-0.09222	0	0.00018	0.92424	0.07558	0	0
1	01:06:03	LD222_(tall_wheat)	LD222_recurrent_parent_(tall)	Phosphorite	2021-03-22 15:02:39	139991	0.17437	0	0	0.03839	0.96085	0.00076	0	229.272	247.391	141.331	0.00051	0.02377	0.86743	0.10576	0.00253	0	23.389	610.589	0.015	229.791	2.51883	145.22	0.42099	0	0	0.04117	0.58359	0.37524	0	-0.06789	0	0	0.76359	0.23586	0.00055	0	-0.06784	0.00061	0.00245	0.76052	0.23471	0.0017	0
1	01:07:01	Chulpan_(rye)	S._cereale_Chulpan	KH2PO4	2021-03-22 15:02:39	117089	0.19368	0	0	0.0208	0.9792	0	0	113.524	128.138	139.452	0	0.01068	0.89487	0.09391	0.00054	0	37.282	1031.41	0.025	567.183	1.65083	94.158	0.50877	0	0	0.00265	0.4218	0.57555	0	-0.07964	0.00021	0	0.79991	0.19988	0	0	-0.06208	0	0	0.80012	0.1995	0.00038	0
1	01:07:02	Chulpan_(rye)	S._cereale_Chulpan	KH2PO4	2021-03-22 15:02:39	247400	0.17954	0	0	0.01542	0.98458	0	0	180.276	196.205	137.049	0	0.01118	0.93133	0.05734	0.00016	0	25.675	1372.34	0.034	565.466	2.30791	124.416	0.44204	0	0	0.01053	0.55876	0.43071	0	-0.0508	0	0	0.76433	0.23567	0	0	-0.04963	0	0.00081	0.76352	0.23546	0.00022	0
1	01:07:03	Chulpan_(rye)	S._cereale_Chulpan	KH2PO4	2021-03-22 15:02:39	206336	0.25842	0	0	0.00516	0.97575	0.01909	0	180.633	198.06	126.481	0	0.02331	0.94552	0.03029	0.00088	0	21.17	1142.29	0.028	386.579	2.76882	119.103	0.53011	0	0	0.0049	0.38891	0.60619	0	-0.01499	0	0	0.58508	0.41459	0.00033	0	-0.017	0	0	0.58508	0.41399	0.00093	0
1	01:08:01	LD222_Rht17_NIL	T._durum_LD222_Rht17_NIL	KH2PO4	2021-03-22 15:02:39	147365	0.21139	0	0	0.02221	0.975	0.0028	0	103.061	132.781	139.039	0	0.00799	0.90483	0.08643	0.00075	0	39.044	1429.88	0.035	860.038	1.58748	52.043	0.51849	0	0	0.00092	0.37623	0.62285	0	-0.07797	0	0	0.80918	0.19082	0	0	-0.06081	0	0.00033	0.80885	0.19082	0	0
1	01:08:02	LD222_Rht17_NIL	T._durum_LD222_Rht17_NIL	KH2PO4	2021-03-22 15:02:39	155268	0.21314	0	0	0.02094	0.97906	0	0	107.953	235.766	136.625	0	0.01235	0.93327	0.05263	0.00175	0	37.826	1438.29	0.035	877.039	1.63054	60.896	0.49932	0	0	0.0075	0.37933	0.61317	0	-0.06331	0	0	0.82906	0.17094	0	0	-0.04824	0	0.00041	0.82865	0.17094	0	0
1	01:08:03	LD222_Rht17_NIL	T._durum_LD222_Rht17_NIL	KH2PO4	2021-03-22 15:02:39	142778	0.26377	0	0.00046	0.00489	0.99187	0.00278	0	195.609	235.042	132.322	0	0.00896	0.97135	0.01819	0.0015	0	17.476	729.913	0.018	198.779	3.32948	139.752	0.6187	0	0	0	0.12706	0.87294	0	-0.08054	0	0	0.8562	0.1438	0	0	-0.03797	0	0	0.8562	0.1438	0	0
1	01:09:01	LD222_(tall_wheat)	LD222_recurrent_parent_(tall)	KH2PO4	2021-03-22 15:02:39	200767	0.20522	0	0	0.02549	0.97451	0	0	203.327	219.666	140.685	0	0.01113	0.90473	0.08074	0.0034	0	28.724	987.412	0.024	450.887	2.08068	129.665	0.52599	0	0	0.00246	0.32758	0.66996	0	-0.07447	0	0	0.765	0.235	0	0	-0.05715	0	0.00108	0.76392	0.235	0	0
1	01:09:02	LD222_(tall_wheat)	LD222_recurrent_parent_(tall)	KH2PO4	2021-03-22 15:02:39	393748	0.22741	0	0	0.01045	0.98955	0	0	239.02	251.63	135.976	0	0.01973	0.9316	0.0485	0.00017	0	24.771	1647.34	0.041	671.535	2.38647	172.109	0.54425	0	0	0.0053	0.26322	0.73147	0	-0.06503	0	0.00045	0.73748	0.26207	0	0	-0.04955	0	0.0012	0.73673	0.26207	0	0
1	01:09:03	LD222_(tall_wheat)	LD222_recurrent_parent_(tall)	KH2PO4	2021-03-22 15:02:39	194318	0.21511	0.00046	0.00091	0.03435	0.96396	0.00031	0	184.08	198.983	130.206	0.00048	0.03355	0.89789	0.06167	0.0064	0	23.498	1055.61	0.026	394.266	2.50789	102.552	0.48786	0.00037	0.00024	0.02881	0.34517	0.6254	0	-0.02973	0	0	0.66799	0.33201	0	0	-0.02943	0.00144	0.00228	0.66427	0.32965	0.00235	0
2	01:01:01	Chulpan_(rye)	S._cereale_Chulpan	w/o_P	2021-03-22 15:55:23	120823	0.13774	0	0	0.04067	0.95933	0	0	177.288	217.28	157.534	0.00044	0.01	0.79184	0.1969	0.00083	0	13.137	681.509	0.017	141.835	4.39915	113.512	0.4688	0	0	0.00123	0.59568	0.40309	0	-0.12028	0	0	0.89868	0.10132	0	0	-0.1082	0	0.00052	0.89816	0.10132	0	0
2	01:01:02	Chulpan_(rye)	S._cereale_Chulpan	w/o_P	2021-03-22 15:55:23	121228	0.20051	0	0	0.00621	0.99354	0.00025	0	153.595	177.512	138.153	0	0.00666	0.96549	0.02751	0.00035	0	19.897	789.271	0.019	266.093	2.93809	108.991	0.54143	0	0	0	0.32679	0.67321	0	-0.08145	0	0	0.81828	0.18172	0	0	-0.05675	0	0	0.81828	0.18172	0	0
2	01:01:03	Chulpan_(rye)	S._cereale_Chulpan	w/o_P	2021-03-22 15:55:23	34089.5	0.16934	0	0	0	1	0	0	147.063	153.716	139.092	0	0.02579	0.96217	0.01203	0	0	9.386	231.802	0.006	24.107	6.13005	74.161	0.46503	0	0	0.00356	0.58168	0.41476	0	-0.07994	0	0	0.88843	0.11157	0	0	-0.0574	0	0	0.88843	0.10979	0.00178	0
2	01:02:01	LD222_Rht17_NIL	T._durum_LD222_Rht17_NIL	w/o_P	2021-03-22 15:55:23	153076	0.16221	0	0	0.03244	0.96756	0	0	182.42	214.076	154.08	0	0.00425	0.81829	0.17715	0.00031	0	14.617	839.141	0.021	180.821	3.96211	131.491	0.51145	0	0	0.00147	0.41056	0.58798	0	-0.13639	0	0	0.91673	0.08327	0	0	-0.11142	0	0.00149	0.91524	0.08327	0	0
2	01:02:02	LD222_Rht17_NIL	T._durum_LD222_Rht17_NIL	w/o_P	2021-03-22 15:55:23	90902.4	0.12547	0	0	0.02223	0.97777	0	0	195.809	213.871	165.419	0	0.00479	0.71701	0.2782	0	0	11.953	464.24	0.011	88.693	4.82753	122.469	0.44932	0	0	0.00106	0.52877	0.47017	0	-0.15311	0	0	0.95908	0.04092	0	0	-0.14471	0	0	0.95908	0.04092	0	0
2	01:02:03	LD222_Rht17_NIL	T._durum_LD222_Rht17_NIL	w/o_P	2021-03-22 15:55:23	55269.9	0.14047	0	0	0.04295	0.95705	0	0	170.356	202.485	154.706	0	0.00284	0.85151	0.14565	0	0	12.651	324.438	0.008	50.8	4.5653	82.652	0.50828	0	0	0	0.36252	0.63748	0	-0.12745	0	0	0.96644	0.03356	0	0	-0.0984	0	0	0.96644	0.03356	0	0
2	01:03:01	LD222_(tall_wheat)	LD222_recurrent_parent_(tall)	w/o_P	2021-03-22 15:55:23	149442	0.17648	0	0	0.07627	0.91964	0.00409	0	196.915	223.501	151.097	0	0.02777	0.75266	0.21957	0	0	23.565	758.915	0.019	287.24	2.5011	136.965	0.52222	0	0	0	0.40102	0.59898	0	-0.12349	0	0.01144	0.79086	0.19727	0.00043	0	-0.1085	0	0.01845	0.78386	0.1977	0	0
2	01:03:02	LD222_(tall_wheat)	LD222_recurrent_parent_(tall)	w/o_P	2021-03-22 15:55:23	267816	0.2129	0	0	0.01133	0.98867	0	0	229.784	257.823	142.919	0	0.00747	0.93059	0.06141	0.00053	0	20.653	1165.51	0.029	400.15	2.83498	132.041	0.52279	0	0	0.0086	0.34034	0.65107	0	-0.10137	0	0.00025	0.81083	0.18893	0	0	-0.0765	0	0.00188	0.80919	0.18808	0.00032	0.00053
2	01:03:03	LD222_(tall_wheat)	LD222_recurrent_parent_(tall)	w/o_P	2021-03-22 15:55:23	171265	0.206	0	0	0.04246	0.9573	0.00024	0	202.26	231.174	137.552	0	0.01479	0.88422	0.10016	0.00083	0	24.265	846.758	0.021	334.256	2.43315	130.547	0.53287	0	0	0.00879	0.29551	0.69569	0	-0.0703	0.00024	0.00278	0.78273	0.21425	0	0	-0.06022	0.00219	0.00706	0.7765	0.21425	0	0
2	01:04:01	Chulpan_(rye)	S._cereale_Chulpan	Phosphorite	2021-03-22 15:55:23	148170	0.21836	0	0	0.05214	0.94697	0.00089	0	144.084	173.719	139.384	0	0.01165	0.83917	0.14919	0	0	22.022	1028.35	0.025	354.525	2.6667	102.9	0.53133	0	0	0	0.35207	0.64793	0	-0.07204	0	0	0.72486	0.27514	0	0	-0.07412	0	0.00597	0.71889	0.27514	0	0
2	01:04:02	Chulpan_(rye)	S._cereale_Chulpan	Phosphorite	2021-03-22 15:55:23	152221	0.2342	0	0	0.00792	0.99208	0	0	185.431	204.305	128.882	0	0.00733	0.94526	0.04742	0	0	18.301	820.906	0.02	243.533	3.1842	130.957	0.5362	0	0	0	0.30727	0.69273	0	-0.02089	0	0	0.64523	0.35477	0	0	-0.02206	0	0	0.64523	0.35477	0	0
2	01:04:03	Chulpan_(rye)	S._cereale_Chulpan	Phosphorite	2021-03-22 15:55:23	156092	0.16018	0	0.00163	0.02333	0.97374	0.0013	0	166.146	194.449	142.279	0.00074	0.01781	0.88886	0.0868	0.00579	0	19.019	939.483	0.023	283.092	3.06821	110.209	0.44342	0	0	0.01764	0.64078	0.34159	0	-0.07175	0	0	0.84214	0.15722	0.00064	0	-0.06108	0	0.00226	0.83989	0.15617	0.0014	0.00029
2	01:05:01	LD222_Rht17_NIL	T._durum_LD222_Rht17_NIL	Phosphorite	2021-03-22 15:55:23	149898	0.23582	0	0	0.00947	0.99019	0.00034	0	184.734	223.43	136.007	0	0.00784	0.95935	0.03217	0.00064	0	13.426	811.423	0.02	165.981	4.306	127.351	0.59405	0	0	0	0.18271	0.81729	0	-0.08098	0	0.00037	0.8347	0.16493	0	0	-0.0455	0	0	0.83507	0.16493	0	0
2	01:05:02	LD222_Rht17_NIL	T._durum_LD222_Rht17_NIL	Phosphorite	2021-03-22 15:55:23	141896	0.15331	0	0	0.04702	0.95298	0	0	197.717	242.702	154.452	0	0.00352	0.81265	0.18383	0	0	11.773	717.672	0.018	137.166	4.90018	139.957	0.47403	0	0	0.0075	0.48017	0.51232	0	-0.11774	0	0	0.95518	0.04482	0	0	-0.10078	0	0	0.95518	0.04482	0	0
2	01:05:03	LD222_Rht17_NIL	T._durum_LD222_Rht17_NIL	Phosphorite	2021-03-22 15:55:23	119908	0.18955	0	0	0.00976	0.98877	0.00147	0	208.229	237.837	143.322	0	0.01525	0.93332	0.05143	0	0	10.49	575.845	0.014	81.745	5.49133	124.431	0.49031	0	0	0.00961	0.51264	0.47775	0	-0.10708	0	0	0.87655	0.12345	0	0	-0.07925	0	0.00045	0.87609	0.12345	0	0
2	01:06:01	LD222_(tall_wheat)	LD222_recurrent_parent_(tall)	Phosphorite	2021-03-22 15:55:23	147533	0.19714	0	0	0.03066	0.96894	0.00041	0	209.475	240.083	146.813	0	0.0184	0.81311	0.16809	0.0004	0	26.758	704.301	0.017	313.194	2.221	117.586	0.54755	0	0	0.00444	0.30187	0.69369	0	-0.09735	0	0.00041	0.75716	0.24243	0	0	-0.07419	0.0004	0.00206	0.75512	0.24243	0	0
2	01:06:02	LD222_(tall_wheat)	LD222_recurrent_parent_(tall)	Phosphorite	2021-03-22 15:55:23	272026	0.17935	0	0.00025	0.03078	0.96897	0	0	225.618	255.342	147.726	0	0.0117	0.89395	0.09252	0.00182	0	24.426	1205.69	0.03	425.283	2.41807	160.893	0.50379	0	0	0.00893	0.38917	0.6019	0	-0.1138	0	0	0.89796	0.10204	0	0	-0.08239	0	0	0.89796	0.10169	0.00016	0.00019
2	01:06:03	LD222_(tall_wheat)	LD222_recurrent_parent_(tall)	Phosphorite	2021-03-22 15:55:23	152836	0.17637	0	0	0.04817	0.94948	0.00234	0	214.428	244.089	142.64	0	0.02558	0.84087	0.13036	0.00319	0	25.269	712.758	0.018	274.546	2.34244	141.569	0.38128	0	0	0.02999	0.648	0.32201	0	-0.0605	0	0	0.82814	0.17036	0.0015	0	-0.06786	0	0.00138	0.82676	0.16873	0.00276	0.00036
2	01:07:01	Chulpan_(rye)	S._cereale_Chulpan	KH2PO4	2021-03-22 15:55:23	195872	0.227	0	0	0.04193	0.95089	0.00718	0	139.035	147.984	136.473	0	0.0122	0.8802	0.10682	0.00078	0	27.977	1408.8	0.035	560.4	2.1315	111.769	0.55712	0	0	0.00024	0.28076	0.71901	0	-0.0561	0	0	0.66646	0.33334	0.0002	0	-0.05067	0	0.0016	0.66485	0.33354	0	0
2	01:07:02	Chulpan_(rye)	S._cereale_Chulpan	KH2PO4	2021-03-22 15:55:23	218795	0.20114	0	0	0.00732	0.99268	0	0	161.031	205.926	133.463	0	0.01222	0.94288	0.0442	0.0007	0	19.216	1358.71	0.034	437.671	3.03802	115.888	0.48101	0	0.00029	0.00348	0.50527	0.49097	0	-0.04738	0	0	0.72485	0.27515	0	0	-0.04408	0.00029	0	0.72456	0.27479	0.00036	0
2	01:07:03	Chulpan_(rye)	S._cereale_Chulpan	KH2PO4	2021-03-22 15:55:23	236987	0.2166	0	0	0.01369	0.98444	0.00187	0	184.62	208.927	133.093	0.0002	0.01563	0.93954	0.04197	0.00265	0	18.637	1283.65	0.032	364.907	3.12893	116.983	0.51873	0	0	0.00705	0.39785	0.5951	0	-0.0539	0	0	0.7763	0.22348	0.00022	0	-0.036	0	0	0.7763	0.22348	0.00022	0
2	01:08:01	LD222_Rht17_NIL	T._durum_LD222_Rht17_NIL	KH2PO4	2021-03-22 15:55:23	221860	0.2005	0	0	0.0588	0.93947	0.00173	0	193.846	210.537	150.134	0	0.0116	0.83446	0.15326	0.00069	0	27.36	1144.51	0.028	516.228	2.17574	138.439	0.57428	0	0	0.00363	0.21268	0.78369	0	-0.14534	0	0.0052	0.88964	0.10488	0.00029	0	-0.10545	0	0.00845	0.88638	0.10517	0	0
2	01:08:02	LD222_Rht17_NIL	T._durum_LD222_Rht17_NIL	KH2PO4	2021-03-22 15:55:23	257282	0.22235	0	0.00067	0.02904	0.97029	0	0	182.469	204.967	139.268	0	0.00522	0.9325	0.06135	0.00093	0	26.174	1410	0.035	606.371	2.26691	135.246	0.53545	0	0	0.01304	0.30918	0.67777	0	-0.09396	0	0.00124	0.87442	0.12435	0	0	-0.07088	0.00352	0.00524	0.8669	0.12435	0	0
2	01:08:03	LD222_Rht17_NIL	T._durum_LD222_Rht17_NIL	KH2PO4	2021-03-22 15:55:23	107756	0.26584	0	0	0.01895	0.97933	0.00172	0	189.279	213.891	125.471	0	0.01448	0.94445	0.04107	0	0	31.264	569.296	0.014	293.05	1.92675	110.283	0.5845	0	0	0	0.1794	0.8206	0	-0.01151	0	0	0.51627	0.48373	0	0	-0.01893	0	0	0.51627	0.48373	0	0
2	01:09:01	LD222_(tall_wheat)	LD222_recurrent_parent_(tall)	KH2PO4	2021-03-22 15:55:23	251859	0.22257	0	0.00079	0.02322	0.97077	0.00523	0	189.369	202.027	138.386	0	0.01605	0.89306	0.08666	0.00424	0	31.308	1329.99	0.033	669.384	1.92434	124.309	0.56379	0	0	0.00349	0.23592	0.76059	0	-0.07438	0	0.00162	0.75534	0.24277	0.00027	0	-0.05426	0	0.00147	0.7555	0.24304	0	0
2	01:09:02	LD222_(tall_wheat)	LD222_recurrent_parent_(tall)	KH2PO4	2021-03-22 15:55:23	312273	0.20641	0	0	0.01868	0.98106	0.00026	0	246.685	278.276	138.621	0	0.01963	0.91566	0.06266	0.00204	0	18.781	1265.88	0.031	395.452	3.10565	184.661	0.49197	0	0	0.0152	0.40064	0.58416	0	-0.0701	0	0	0.81961	0.18039	0	0	-0.06107	0	0.00014	0.81948	0.18039	0	0
2	01:09:03	LD222_(tall_wheat)	LD222_recurrent_parent_(tall)	KH2PO4	2021-03-22 15:55:23	55948.3	0.2599	0	0	0.01339	0.97553	0.01108	0	192.636	214.519	121.524	0	0.03805	0.94165	0.01876	0.00154	0	30.832	290.435	0.007	141.384	1.95101	141.358	0.53192	0	0.00072	0.01368	0.2321	0.7535	0	0.02783	0	0	0.48141	0.5145	0.00409	0	0.00548	0.00077	0.00223	0.47841	0.51536	0.00323	0
1	02:01:01	Chulpan_(rye)	S._cereale_Chulpan	w/o_P	2021-03-22 16:12:54	85785.2	0.11437	0	0	0.03488	0.96512	0	0	155.874	165.465	158.288	0	0.00745	0.75446	0.23551	0.00258	0	10.463	550.349	0.014	86.681	5.50515	114.98	0.42369	0	0	0.00164	0.76544	0.23292	0	-0.11881	0	0.00513	0.93726	0.05761	0	0	-0.11515	0	0.00297	0.93941	0.05686	0.00075	0
1	02:01:02	Chulpan_(rye)	S._cereale_Chulpan	w/o_P	2021-03-22 16:12:54	170444	0.11947	0	0	0.02552	0.97448	0	0	196.73	235.225	155.596	0	0.00313	0.85769	0.13918	0	0	9.727	866.384	0.021	141.815	5.91708	135.785	0.38263	0	0	0.01064	0.81997	0.16939	0	-0.10325	0	0	0.92689	0.07311	0	0	-0.10487	0.00052	0.00179	0.92458	0.07311	0	0
1	02:01:03	Chulpan_(rye)	S._cereale_Chulpan	w/o_P	2021-03-22 16:12:54	66964.1	0.23956	0	0	0.0099	0.98075	0.00935	0	124.008	137.372	130.166	0	0.02206	0.95262	0.02449	0.00084	0	18.039	539.999	0.013	150.403	3.22901	81.217	0.53544	0	0	0.00125	0.40257	0.59618	0	-0.04454	0	0	0.71606	0.28348	0.00046	0	-0.02736	0	0.00449	0.71157	0.28394	0	0
1	02:02:01	LD222_Rht17_NIL	T._durum_LD222_Rht17_NIL	w/o_P	2021-03-22 16:12:54	53355.2	0.1343	0	0	0.05789	0.94211	0	0	171.098	183.111	155.118	0	0.01779	0.70694	0.27527	0	0	10.763	311.841	0.008	53.149	5.35345	140.15	0.44558	0	0	0.00313	0.60538	0.39149	0	-0.11868	0	0.00133	0.84014	0.15853	0	0	-0.11663	0	0.00537	0.83609	0.15853	0	0
1	02:02:02	LD222_Rht17_NIL	T._durum_LD222_Rht17_NIL	w/o_P	2021-03-22 16:12:54	155396	0.19332	0	0	0.02506	0.97494	0	0	178.134	194.776	149.578	0	0.00192	0.86499	0.13206	0.00103	0	21.71	872.356	0.022	313.919	2.70317	100.782	0.49207	0	0.00035	0.01595	0.43268	0.55102	0	-0.12378	0	0	0.94982	0.04992	0.00026	0	-0.09472	0	0	0.95016	0.04772	0.00156	0.00057
1	02:02:03	LD222_Rht17_NIL	T._durum_LD222_Rht17_NIL	w/o_P	2021-03-22 16:12:54	90177.7	0.21789	0	0	0.00702	0.99246	0.00052	0	196.126	217.014	138.821	0	0.0056	0.96978	0.02462	0	0	11.101	459.794	0.011	71.094	5.19269	104.196	0.56895	0	0	0	0.22805	0.77195	0	-0.10128	0	0	0.9043	0.09525	0.00045	0	-0.06127	0	0	0.9043	0.09525	0.00045	0
1	02:03:01	LD222_(tall_wheat)	LD222_recurrent_parent_(tall)	w/o_P	2021-03-22 16:12:54	163237	0.15338	0	0	0.05671	0.94329	0	0	234.153	275.09	156.006	0	0.00958	0.81691	0.17351	0	0	24.599	697.139	0.017	265.467	2.4021	150.424	0.52555	0	0	0.0058	0.34389	0.65031	0	-0.14447	0	0	0.90927	0.09073	0	0	-0.10498	0	0.00184	0.90744	0.0904	0.00033	0
1	02:03:02	LD222_(tall_wheat)	LD222_recurrent_parent_(tall)	w/o_P	2021-03-22 16:12:54	232101	0.20924	0	0	0.00882	0.99001	0.00118	0	219.675	258.873	140.359	0	0.02752	0.92426	0.04787	0.00035	0	25.098	1056.56	0.026	438.496	2.35737	128.74	0.52938	0	0	0.00032	0.34221	0.65747	0	-0.09106	0	0	0.83687	0.16257	0.00056	0	-0.06605	0	0.00067	0.8362	0.16257	0.00056	0
1	02:03:03	LD222_(tall_wheat)	LD222_recurrent_parent_(tall)	w/o_P	2021-03-22 16:12:54	152507	0.23499	0	0	0.03325	0.95803	0.00871	0	186.941	195.064	134.035	0	0.01428	0.88844	0.09365	0.00363	0	35.681	815.804	0.02	469.22	1.71439	106.669	0.55445	0	0	0.02005	0.21688	0.76306	0	-0.04926	0	0	0.66676	0.33324	0	0	-0.04083	0	0	0.66676	0.33324	0	0
1	02:04:01	Chulpan_(rye)	S._cereale_Chulpan	Phosphorite	2021-03-22 16:12:54	196873	0.12375	0	0.00038	0.02791	0.97172	0	0	166.823	203.328	161.961	0	0.00229	0.78104	0.21667	0	0	15.81	1180.13	0.029	297.832	3.66984	112.387	0.44513	0.00059	0	0.00154	0.62152	0.37635	0	-0.14091	0	0.00105	0.93962	0.05934	0	0	-0.13215	0.00105	0.00326	0.93635	0.05934	0	0
1	02:04:02	Chulpan_(rye)	S._cereale_Chulpan	Phosphorite	2021-03-22 16:12:54	219918	0.15726	0	0	0.01004	0.98996	0	0	182.397	196.896	147.876	0	0.00774	0.89254	0.09895	0.00077	0	22.46	1205.71	0.03	403.08	2.61728	98.816	0.45768	0	0	0.00367	0.63594	0.36039	0	-0.09227	0	0	0.84125	0.15875	0	0	-0.08314	0	0	0.84125	0.15875	0	0
1	02:04:03	Chulpan_(rye)	S._cereale_Chulpan	Phosphorite	2021-03-22 16:12:54	91474.8	0.15572	0	0	0.01847	0.98073	0.0008	0	161.956	195.483	139.092	0.00133	0.02556	0.90649	0.06618	0.00043	0	12.604	564.811	0.014	102.601	4.58204	121.088	0.42059	0	0	0.00414	0.74363	0.25224	0	-0.05469	0	0	0.78302	0.21698	0	0	-0.05206	0	0	0.78302	0.21632	0.00066	0
1	02:05:01	LD222_Rht17_NIL	T._durum_LD222_Rht17_NIL	Phosphorite	2021-03-22 16:12:54	142073	0.13567	0	0.00028	0.05445	0.94526	0	0	205.362	227.476	160.852	0.00032	0.0069	0.73381	0.25897	0	0	14.207	691.816	0.017	153.69	4.07392	145.154	0.4666	0	0	0.00672	0.47405	0.51923	0	-0.14494	0	0	0.94108	0.05892	0	0	-0.12864	0.00028	0.00117	0.93963	0.05868	0.00024	0
1	02:05:02	LD222_Rht17_NIL	T._durum_LD222_Rht17_NIL	Phosphorite	2021-03-22 16:12:54	163088	0.16038	0	0	0.02739	0.97261	0	0	219.288	238.679	159.051	0	0.00183	0.84596	0.1522	0	0	16.265	743.717	0.018	206.453	3.57	116.724	0.47714	0	0	0.01406	0.38994	0.596	0	-0.15782	0	0	0.98629	0.01371	0	0	-0.12913	0	0.00141	0.98487	0.01371	0	0
1	02:05:03	LD222_Rht17_NIL	T._durum_LD222_Rht17_NIL	Phosphorite	2021-03-22 16:12:54	141340	0.24385	0	0	0.00709	0.98991	0.00301	0	197.012	225.099	137.813	0	0.00722	0.97275	0.01823	0.0018	0	12.484	717.42	0.018	118.799	4.62536	127.836	0.60608	0	0	0	0.15781	0.84219	0	-0.10531	0	0	0.89498	0.10502	0	0	-0.05762	0	0	0.89498	0.10502	0	0
1	02:06:01	LD222_(tall_wheat)	LD222_recurrent_parent_(tall)	Phosphorite	2021-03-22 16:12:54	161812	0.1824	0	0.00156	0.0375	0.96011	0.00083	0	230.28	272.565	147.721	0	0.0148	0.82923	0.15168	0.00429	0	15.807	702.678	0.017	173.361	3.67053	141.444	0.51947	0	0.0005	0.00231	0.44572	0.55147	0	-0.11137	0	0.00074	0.84528	0.15398	0	0	-0.09463	0.0023	0	0.84372	0.15367	0.0003	0
1	02:06:02	LD222_(tall_wheat)	LD222_recurrent_parent_(tall)	Phosphorite	2021-03-22 16:12:54	235966	0.21021	0	0	0.0127	0.9873	0	0	180.794	201.284	140.022	0	0.00434	0.93682	0.05737	0.00147	0	28.258	1305.17	0.032	573.8	2.11209	87.876	0.52938	0	0	0.00242	0.29441	0.70317	0	-0.07753	0	0.00039	0.83323	0.16638	0	0	-0.06263	0	0.00092	0.8327	0.16638	0	0
1	02:06:03	LD222_(tall_wheat)	LD222_recurrent_parent_(tall)	Phosphorite	2021-03-22 16:12:54	187740	0.22717	0	0	0.07487	0.89756	0.02757	0	249.553	274.44	140.035	0	0.01723	0.83851	0.14204	0.00222	0	24.947	752.306	0.019	296.323	2.37077	122.658	0.54049	0	0	0.01441	0.3195	0.66609	0	-0.07506	0	0.0032	0.75111	0.24179	0.0039	0	-0.06266	0	0.00701	0.7473	0.24505	0.00064	0
1	02:07:01	Chulpan_(rye)	S._cereale_Chulpan	KH2PO4	2021-03-22 16:12:54	137098	0.22545	0	0	0.01068	0.98611	0.00321	0	129.076	160.706	131.396	0	0.01565	0.93732	0.04675	0.00029	0	22.889	1062.15	0.026	377.282	2.57078	92.758	0.55618	0	0	0.0002	0.23311	0.76668	0	-0.03048	0	0	0.64286	0.35714	0	0	-0.03087	0	0	0.64286	0.35714	0	0
1	02:07:02	Chulpan_(rye)	S._cereale_Chulpan	KH2PO4	2021-03-22 16:12:54	272357	0.17138	0	0	0.0311	0.9689	0	0	189.565	214.031	145.528	0.0003	0.00538	0.82434	0.16806	0.00191	0	22.245	1436.75	0.035	473.398	2.64133	148.004	0.47021	0	0	0.01639	0.5072	0.47642	0	-0.07952	0	0.00028	0.81829	0.18143	0	0	-0.07901	0	0.00061	0.81796	0.18143	0	0
1	02:07:03	Chulpan_(rye)	S._cereale_Chulpan	KH2PO4	2021-03-22 16:12:54	209452	0.25781	0	0	0.02163	0.97276	0.00561	0	134.891	166.917	121.928	0	0.0251	0.93397	0.03809	0.00285	0	32.79	1552.75	0.038	806.349	1.84643	71.623	0.54401	0	0	0.01094	0.29674	0.69232	0	0.00966	0	0.00047	0.48806	0.51046	0.00101	0	-0.0058	0.00051	0.00023	0.48779	0.51147	0	0
1	02:08:01	LD222_Rht17_NIL	T._durum_LD222_Rht17_NIL	KH2PO4	2021-03-22 16:12:54	327014	0.1661	0	0	0.08687	0.91257	0.00055	0	218.954	267.549	157.581	0	0.0058	0.72212	0.27148	0.0006	0	15.356	1493.53	0.037	347.66	3.77566	154.78	0.51534	0	0	0.00246	0.43617	0.56137	0	-0.1479	0	0.00746	0.86178	0.13059	0.00017	0	-0.13628	0	0.02959	0.83965	0.13059	0.00017	0
1	02:08:02	LD222_Rht17_NIL	T._durum_LD222_Rht17_NIL	KH2PO4	2021-03-22 16:12:54	345309	0.20891	0	0	0.0357	0.9643	0	0	209.588	244.622	139.737	0.00011	0.01098	0.87309	0.11299	0.00283	0	24.425	1647.56	0.041	637.349	2.4182	150.493	0.50422	0	0	0.01668	0.38944	0.59388	0	-0.06316	0	0	0.75719	0.24281	0	0	-0.05897	0	0.00091	0.75629	0.24281	0	0
1	02:08:03	LD222_Rht17_NIL	T._durum_LD222_Rht17_NIL	KH2PO4	2021-03-22 16:12:54	118200	0.2611	0	0	0.04379	0.95069	0.00552	0	141.602	156.622	133.982	0	0.01349	0.90583	0.07522	0.00547	0	36.462	834.735	0.021	486.576	1.6826	81.823	0.57794	0	0	0.02082	0.17273	0.80645	0	-0.06294	0	0.00122	0.7366	0.26218	0	0	-0.04782	0	0.00186	0.73596	0.26218	0	0
1	02:09:01	LD222_(tall_wheat)	LD222_recurrent_parent_(tall)	KH2PO4	2021-03-22 16:12:54	318616	0.19803	0	0	0.03845	0.95766	0.00389	0	236.858	269.249	149.443	0	0.02056	0.82391	0.15263	0.0029	0	28.243	1345.17	0.033	618.44	2.11308	160.146	0.54221	0	0	0.00371	0.27661	0.71968	0	-0.1223	0	0	0.84844	0.15156	0	0	-0.09449	0	0.0013	0.84714	0.15156	0	0
1	02:09:02	LD222_(tall_wheat)	LD222_recurrent_parent_(tall)	KH2PO4	2021-03-22 16:12:54	268140	0.22664	0	0	0.01195	0.98805	0	0	180.729	212.49	125.692	0.00014	0.01855	0.9453	0.0348	0.0012	0	33.975	1483.66	0.037	783.294	1.78938	106.738	0.50124	0	0	0.00397	0.37692	0.61911	0	-0.00752	0	0	0.55535	0.44442	0.00023	0	-0.01427	0	0	0.55535	0.44465	0	0
1	02:09:03	LD222_(tall_wheat)	LD222_recurrent_parent_(tall)	KH2PO4	2021-03-22 16:12:54	124643	0.24054	0	0	0.02705	0.96442	0.00853	0	264.09	287.455	128.674	0	0.05938	0.87911	0.06151	0	0	22.831	471.97	0.012	172.001	2.57701	179.713	0.54844	0	0	0.00053	0.29028	0.70919	0	-0.03815	0	0.00082	0.66057	0.33687	0.00173	0	-0.02518	0	0.00172	0.65968	0.33807	0.00053	0
2	02:01:01	Chulpan_(rye)	S._cereale_Chulpan	w/o_P	2021-03-22 16:30:56	71666.6	0.19819	0	0	0.02336	0.97527	0.00137	0	174.462	204.769	146.243	0	0.00087	0.83493	0.1635	0.0007	0	13.252	410.786	0.01	91.924	4.36151	111.838	0.5254	0	0	0.01049	0.42568	0.56382	0	-0.09321	0	0	0.83273	0.16727	0	0	-0.0806	0.0012	0.00081	0.83072	0.16727	0	0
2	02:01:02	Chulpan_(rye)	S._cereale_Chulpan	w/o_P	2021-03-22 16:30:56	144710	0.10537	0	0	0.03253	0.96747	0	0	199.586	236.626	161.58	0	0.00515	0.80054	0.19086	0.00345	0	9.771	725.051	0.018	120.081	5.8908	130.908	0.34274	0	0	0.02463	0.83913	0.13623	0	-0.11257	0	0	0.96409	0.03591	0	0	-0.12394	0	0	0.96409	0.03498	0.00093	0
2	02:01:03	Chulpan_(rye)	S._cereale_Chulpan	w/o_P	2021-03-22 16:30:56	46673.9	0.19006	0	0	0.01789	0.98211	0	0	130.03	152.042	134.901	0	0.01083	0.95633	0.03283	0	0	12.122	358.946	0.009	62.725	4.7611	88.876	0.51237	0	0	0.00249	0.4233	0.57421	0	-0.06133	0	0	0.8197	0.1803	0	0	-0.0402	0	0	0.8197	0.1803	0	0
2	02:02:01	LD222_Rht17_NIL	T._durum_LD222_Rht17_NIL	w/o_P	2021-03-22 16:30:56	61477.3	0.18093	0	0	0.02316	0.97684	0	0	154.711	176.262	146.148	0	0.00604	0.91686	0.0771	0	0	11.296	397.369	0.01	63.141	5.10413	89.855	0.53653	0	0	0	0.36825	0.63175	0	-0.11253	0	0	0.88912	0.11088	0	0	-0.08261	0	0	0.88912	0.11088	0	0
2	02:02:02	LD222_Rht17_NIL	T._durum_LD222_Rht17_NIL	w/o_P	2021-03-22 16:30:56	124569	0.19307	0	0	0.02235	0.97765	0	0	181.729	194.333	152.284	0.00073	0.00256	0.86125	0.13454	0.00092	0	19.569	685.469	0.017	223.257	2.98529	109.835	0.54499	0	0	0	0.32596	0.67404	0	-0.14126	0	0	0.95939	0.04061	0	0	-0.102	0	0	0.95939	0.04061	0	0
2	02:02:03	LD222_Rht17_NIL	T._durum_LD222_Rht17_NIL	w/o_P	2021-03-22 16:30:56	65273.3	0.14862	0	0	0.02103	0.97897	0	0	190.014	191.769	150.66	0	0.00879	0.87189	0.11931	0	0	13.46	343.518	0.008	75.637	4.29539	113.064	0.45998	0	0	0	0.6042	0.3958	0	-0.10847	0	0	0.9014	0.0986	0	0	-0.09521	0	0	0.9014	0.0986	0	0
2	02:03:01	LD222_(tall_wheat)	LD222_recurrent_parent_(tall)	w/o_P	2021-03-22 16:30:56	181953	0.20029	0	0.00108	0.01437	0.98455	0	0	257.311	277.166	143.97	0	0.01109	0.93293	0.0537	0.00228	0	20.703	707.133	0.017	224.923	2.82834	172.618	0.54402	0	0	0.00067	0.30974	0.68959	0	-0.11432	0.00043	0.0005	0.89665	0.10242	0	0	-0.07482	0.00094	0.00085	0.8958	0.10242	0	0
2	02:03:02	LD222_(tall_wheat)	LD222_recurrent_parent_(tall)	w/o_P	2021-03-22 16:30:56	239817	0.21362	0	0	0.01165	0.98835	0	0	225.492	258.453	138.383	0	0.01237	0.95277	0.03414	0.00071	0	24.116	1063.53	0.026	410.865	2.44733	139.561	0.51656	0	0	0.00635	0.37206	0.62158	0	-0.08398	0	0	0.87176	0.12761	0.00063	0	-0.05853	0	0	0.87176	0.12743	0.00018	0.00063
2	02:03:03	LD222_(tall_wheat)	LD222_recurrent_parent_(tall)	w/o_P	2021-03-22 16:30:56	222197	0.23117	0	0	0.05523	0.924	0.02077	0	188.039	194.843	134.811	0	0.02699	0.87073	0.09969	0.0026	0	34.766	1181.65	0.029	637.194	1.75362	86.74	0.53709	0	0	0.00792	0.29869	0.6934	0	-0.04242	0	0.00218	0.659	0.33462	0.00419	0	-0.04291	0	0.00569	0.6555	0.33854	0.00027	0
2	02:04:01	Chulpan_(rye)	S._cereale_Chulpan	Phosphorite	2021-03-22 16:30:56	113935	0.16201	0	0	0.01613	0.98387	0	0	157.383	197.523	144.924	0	0.0148	0.89294	0.09184	0.00042	0	14.029	723.934	0.018	155.73	4.12451	123.534	0.48532	0	0	0.00275	0.47752	0.51974	0	-0.08682	0	0	0.86461	0.13539	0	0	-0.0731	0	0	0.86461	0.13539	0	0
2	02:04:02	Chulpan_(rye)	S._cereale_Chulpan	Phosphorite	2021-03-22 16:30:56	251455	0.17577	0	0	0.02431	0.97569	0	0	181.537	203.093	142.954	0	0.0156	0.90045	0.08171	0.00225	0	21.501	1385.14	0.034	455.38	2.72819	108.765	0.46216	0	0	0.01025	0.49647	0.49328	0	-0.08321	0	0	0.89153	0.10847	0	0	-0.06496	0	0.00023	0.89129	0.10847	0	0
2	02:04:03	Chulpan_(rye)	S._cereale_Chulpan	Phosphorite	2021-03-22 16:30:56	127074	0.21473	0	0	0.00828	0.99076	0.00096	0	160.81	190.953	133.271	0	0.01738	0.94488	0.03773	0	0	12.589	790.213	0.019	148.241	4.58726	112.064	0.52754	0	0	0.00194	0.36885	0.62921	0	-0.05985	0	0	0.76864	0.23094	0.00042	0	-0.03662	0	0	0.76864	0.23096	0.0004	0
2	02:05:01	LD222_Rht17_NIL	T._durum_LD222_Rht17_NIL	Phosphorite	2021-03-22 16:30:56	107715	0.20212	0	0	0.04684	0.95316	0	0	199.744	209.517	146.776	0	0.00564	0.77157	0.22206	0.00073	0	14.364	539.263	0.013	116.468	4.03033	139.526	0.53077	0	0	0	0.36735	0.63265	0	-0.10438	0	0	0.83067	0.16933	0	0	-0.0855	0	0	0.83067	0.16933	0	0
2	02:05:02	LD222_Rht17_NIL	T._durum_LD222_Rht17_NIL	Phosphorite	2021-03-22 16:30:56	153086	0.17417	0	0	0.03392	0.96608	0	0	216.539	255.127	152.72	0	0.00419	0.83679	0.15824	0.00079	0	15.75	706.966	0.017	191.948	3.6835	128.035	0.52	0	0	0.00246	0.39069	0.60685	0	-0.13519	0	0	0.9503	0.0497	0	0	-0.10293	0	0	0.9503	0.0497	0	0
2	02:05:03	LD222_Rht17_NIL	T._durum_LD222_Rht17_NIL	Phosphorite	2021-03-22 16:30:56	48125	0.13297	0	0	0.04567	0.95433	0	0	198.731	210.309	158.701	0	0.01232	0.77627	0.21141	0	0	14.074	242.162	0.006	55.756	4.1116	113.249	0.47376	0	0	0	0.61195	0.38805	0	-0.13347	0	0.00197	0.92546	0.07256	0	0	-0.12032	0	0	0.92744	0.07256	0	0
2	02:06:01	LD222_(tall_wheat)	LD222_recurrent_parent_(tall)	Phosphorite	2021-03-22 16:30:56	157164	0.13543	0	0.00086	0.13963	0.85652	0.00299	0	253.931	259.852	164.84	0	0.01235	0.62208	0.36255	0.00303	0	17.532	618.926	0.015	179.811	3.31916	165.281	0.47888	0	0	0.00756	0.58869	0.40375	0	-0.16009	0	0.02055	0.88356	0.09589	0	0	-0.16862	0	0.06869	0.83542	0.09589	0	0
2	02:06:02	LD222_(tall_wheat)	LD222_recurrent_parent_(tall)	Phosphorite	2021-03-22 16:30:56	306153	0.19605	0	0	0.01195	0.98805	0	0	185.174	211.076	142.834	0	0.01144	0.9249	0.06281	0.00085	0	26.59	1653.33	0.041	707.254	2.23399	104.296	0.53979	0	0	0.00495	0.2995	0.69555	0	-0.10195	0	0.00018	0.8626	0.13705	0.00017	0	-0.07154	0	0.00018	0.8626	0.13686	0.00019	0.00017
2	02:06:03	LD222_(tall_wheat)	LD222_recurrent_parent_(tall)	Phosphorite	2021-03-22 16:30:56	278422	0.19159	0	0.00202	0.05915	0.9376	0.00123	0	230.787	268.69	146.107	0	0.01427	0.84537	0.13586	0.0045	0	20.41	1206.4	0.03	388.472	2.86726	138.613	0.47344	0	0	0.03053	0.44004	0.52943	0	-0.08619	0	0.00075	0.83127	0.16798	0	0	-0.08172	0.00182	0.00647	0.82372	0.16772	0.00026	0
2	02:07:01	Chulpan_(rye)	S._cereale_Chulpan	KH2PO4	2021-03-22 16:30:56	152315	0.19359	0	0	0.05988	0.93896	0.00115	0	124.087	163.903	138.723	0	0.02255	0.8278	0.14782	0.00184	0	21.808	1227.49	0.03	405.74	2.69158	95.885	0.51365	0	0	0.00107	0.41021	0.58872	0	-0.06334	0.00045	0.00393	0.70113	0.29449	0	0	-0.06534	0	0.01563	0.68989	0.29449	0	0
2	02:07:02	Chulpan_(rye)	S._cereale_Chulpan	KH2PO4	2021-03-22 16:30:56	306451	0.15013	0	0	0.02509	0.97491	0	0	189.639	220.088	154.172	0	0.00878	0.82854	0.16187	0.0008	0	19.785	1615.97	0.04	478.017	2.95397	139.148	0.46113	0	0	0.00601	0.5579	0.43609	0	-0.11599	0	0	0.92257	0.07743	0	0	-0.09725	0	0.00064	0.92194	0.07743	0	0
2	02:07:03	Chulpan_(rye)	S._cereale_Chulpan	KH2PO4	2021-03-22 16:30:56	409018	0.23269	0	0	0.02496	0.97276	0.00228	0	203.091	247.426	128.398	0.00013	0.02188	0.92762	0.04889	0.00149	0	23.553	2013.96	0.05	695.804	2.50236	139.721	0.51876	0	0	0.01566	0.34179	0.64254	0	-0.0274	0	0	0.65488	0.34416	0.00097	0	-0.02138	0	0.00147	0.6534	0.34223	0.00236	0.00054
2	02:08:01	LD222_Rht17_NIL	T._durum_LD222_Rht17_NIL	KH2PO4	2021-03-22 16:30:56	255553	0.11455	0	0.00049	0.06603	0.93348	0	0	244.011	270.333	171.003	0	0.00229	0.67338	0.32287	0.00147	0	16.785	1047.3	0.026	289.643	3.46243	167.587	0.43753	0	0	0.00413	0.5652	0.43067	0	-0.17561	0	0.00029	0.97717	0.02253	0	0	-0.16296	0	0.00795	0.96951	0.02253	0	0
2	02:08:02	LD222_Rht17_NIL	T._durum_LD222_Rht17_NIL	KH2PO4	2021-03-22 16:30:56	380793	0.16614	0	0	0.03132	0.96868	0	0	215.775	250.443	151.145	0.00035	0.01085	0.85944	0.12749	0.00186	0	19.485	1764.77	0.044	566.941	2.99768	156.602	0.46223	0	0	0.01546	0.48517	0.49937	0	-0.11047	0	0	0.86775	0.13225	0	0	-0.10019	0	0	0.86775	0.13225	0	0
2	02:08:03	LD222_Rht17_NIL	T._durum_LD222_Rht17_NIL	KH2PO4	2021-03-22 16:30:56	161984	0.19185	0	0.00082	0.06378	0.93395	0.00145	0	211.406	244.215	137.169	0	0.02439	0.86656	0.10337	0.00567	0	23.401	766.222	0.019	291.978	2.51763	143.024	0.48783	0	0.00177	0.02317	0.39098	0.58408	0	-0.05953	0	0.00083	0.76948	0.22969	0	0	-0.05205	0	0.00333	0.76697	0.22722	0.00164	0.00084
2	02:09:01	LD222_(tall_wheat)	LD222_recurrent_parent_(tall)	KH2PO4	2021-03-22 16:30:56	289635	0.19813	0	0	0.02762	0.96768	0.0047	0	244.936	267.301	141.338	0	0.01222	0.87172	0.11606	0	0	25.973	1182.49	0.029	484.593	2.28321	187.87	0.51276	0	0	0.00302	0.37064	0.62634	0	-0.07209	0	0.00027	0.71704	0.28213	0.00057	0	-0.06261	0.00066	0.00233	0.71432	0.28241	0.00028	0
2	02:09:02	LD222_(tall_wheat)	LD222_recurrent_parent_(tall)	KH2PO4	2021-03-22 16:30:56	371501	0.21424	0	0	0.03748	0.96252	0	0	177.122	243.637	137.023	0	0.01768	0.89763	0.08285	0.00184	0	32.343	2097.42	0.052	1068.32	1.86911	92.595	0.49725	0	0	0.01587	0.33836	0.64576	0	-0.06339	0	0.00011	0.77736	0.22253	0	0	-0.05629	0.00043	0.0013	0.77575	0.22253	0	0
2	02:09:03	LD222_(tall_wheat)	LD222_recurrent_parent_(tall)	KH2PO4	2021-03-22 16:30:56	301512	0.19694	0	0	0.0281	0.96932	0.00258	0	260.227	313.927	138.496	0.00016	0.01487	0.90071	0.08116	0.0031	0	19.532	1158.65	0.029	371.591	2.99074	193.777	0.47069	0	0.00029	0.01789	0.49053	0.4913	0	-0.07361	0	0	0.76715	0.23166	0.00119	0	-0.05738	0	0.00116	0.76599	0.23004	0.00238	0.00043
1	02:01:01	Chulpan_(rye)	S._cereale_Chulpan	w/o_P	2021-03-24 14:51:41	145845	0.12668	0	0	0.04355	0.95645	0	0	184.912	226.593	157.791	0	0.00985	0.75552	0.23463	0	0	15.968	788.726	0.019	192.57	3.6345	142.442	0.45028	0	0	0.00231	0.60103	0.39666	0	-0.12294	0	0	0.92634	0.07366	0	0	-0.11305	0	0	0.92634	0.07366	0	0
1	02:01:02	Chulpan_(rye)	S._cereale_Chulpan	w/o_P	2021-03-24 14:51:41	150060	0.11884	0	0	0.01769	0.98231	0	0	219.545	266.05	156.075	0	0.00552	0.82927	0.16521	0	0	9.903	683.505	0.017	107.766	5.81299	149.553	0.39725	0	0	0.00682	0.74459	0.24859	0	-0.10247	0	0	0.92887	0.07113	0	0	-0.10071	0	0	0.92887	0.07113	0	0
1	02:01:03	Chulpan_(rye)	S._cereale_Chulpan	w/o_P	2021-03-24 14:51:41	58808.7	0.1834	0	0	0.00693	0.99307	0	0	168.324	187.682	135.114	0	0.02747	0.94822	0.02431	0	0	11.387	349.378	0.009	48.06	5.06377	127.243	0.48059	0	0	0.00188	0.5621	0.43602	0	-0.0605	0	0	0.80739	0.19261	0	0	-0.04305	0	0	0.80739	0.19261	0	0
1	02:02:01	LD222_Rht17_NIL	T._durum_LD222_Rht17_NIL	w/o_P	2021-03-24 14:51:41	67923.4	0.11478	0	0	0.10146	0.89854	0	0	211.561	301.98	163.192	0	0.02514	0.6791	0.29576	0	0	15.232	321.059	0.008	71.885	3.80575	162.158	0.42089	0	0	0.00507	0.66377	0.33115	0	-0.13138	0	0	0.874	0.126	0	0	-0.13606	0	0.00598	0.86803	0.126	0	0
1	02:02:02	LD222_Rht17_NIL	T._durum_LD222_Rht17_NIL	w/o_P	2021-03-24 14:51:41	203502	0.16389	0	0	0.02724	0.97276	0	0	204.524	250.212	153.549	0	0.00233	0.85272	0.1438	0.00115	0	18.294	995.006	0.025	294.101	3.18548	130.246	0.48524	0	0.00044	0.01257	0.49342	0.49357	0	-0.13547	0	0.00019	0.95314	0.04668	0	0	-0.10943	0.00154	0.00181	0.94998	0.04615	0.00053	0
1	02:02:03	LD222_Rht17_NIL	T._durum_LD222_Rht17_NIL	w/o_P	2021-03-24 14:51:41	192212	0.26129	0	0	0.00949	0.98978	0.00073	0	191.531	218.032	133.506	0	0.00418	0.97571	0.01909	0.00102	0	25.668	1003.56	0.025	429.493	2.30847	129.602	0.60825	0	0	0.00133	0.14115	0.85752	0	-0.08519	0	0	0.86684	0.13316	0	0	-0.04547	0	0	0.86684	0.13316	0	0
1	02:03:01	LD222_(tall_wheat)	LD222_recurrent_parent_(tall)	w/o_P	2021-03-24 14:51:41	263842	0.22297	0	0.00059	0.01862	0.98034	0.00045	0	252.785	277.751	138.907	0	0.0044	0.88466	0.11029	0.00065	0	26.025	1043.74	0.026	427.126	2.27894	167.192	0.56431	0	0	0.00092	0.24163	0.75745	0	-0.07812	0	0.00097	0.73885	0.26018	0	0	-0.06273	0.00079	0.00241	0.73662	0.26018	0	0
1	02:03:02	LD222_(tall_wheat)	LD222_recurrent_parent_(tall)	w/o_P	2021-03-24 14:51:41	392877	0.20404	0	0	0.01492	0.98508	0	0	249.331	305.261	143.322	0	0.01057	0.90427	0.08492	0.00024	0	24.081	1575.72	0.039	623.394	2.45067	153.764	0.49903	0	0	0.00337	0.45413	0.5425	0	-0.08534	0	0	0.76135	0.23865	0	0	-0.07628	0	0	0.76135	0.23835	0.0003	0
1	02:03:03	LD222_(tall_wheat)	LD222_recurrent_parent_(tall)	w/o_P	2021-03-24 14:51:41	228222	0.17678	0	0	0.06024	0.93976	0	0	248.169	267.056	139.463	0	0.02485	0.858	0.10905	0.00811	0	25.799	919.625	0.023	390.807	2.29755	174.912	0.48229	0	0	0.01218	0.44812	0.5397	0	-0.07971	0	0.0003	0.8053	0.1944	0	0	-0.06576	0	0.00355	0.80205	0.19378	0.00062	0
1	02:04:01	Chulpan_(rye)	S._cereale_Chulpan	Phosphorite	2021-03-24 14:51:41	263347	0.13428	0	0	0.03499	0.96501	0	0	165.266	191.121	158.53	0	0.00396	0.82161	0.17412	0.00031	0	18.277	1593.47	0.039	463.785	3.18834	108.531	0.46381	0	0	0	0.59595	0.40405	0	-0.13367	0	0	0.9354	0.0646	0	0	-0.11646	0	0.00053	0.93487	0.0646	0	0
1	02:04:02	Chulpan_(rye)	S._cereale_Chulpan	Phosphorite	2021-03-24 14:51:41	282927	0.15398	0	0	0.03148	0.96852	0	0	198.072	218.46	152.311	0	0.0032	0.86672	0.12924	0.00084	0	20.046	1428.4	0.035	468.772	2.91702	109.669	0.46505	0	0	0.01168	0.53032	0.458	0	-0.10823	0	0	0.92488	0.07512	0	0	-0.09308	0	0.00054	0.92435	0.07512	0	0
1	02:04:03	Chulpan_(rye)	S._cereale_Chulpan	Phosphorite	2021-03-24 14:51:41	141523	0.24439	0	0	0.01549	0.98186	0.00266	0	109.994	159.206	126.614	0	0.0221	0.94354	0.0338	0.00056	0	33.49	1286.64	0.032	672.255	1.8122	85.675	0.53619	0	0	0.00462	0.29507	0.70031	0	-0.02259	0	0.00024	0.62638	0.37197	0.00141	0	-0.01888	0	0.00267	0.62394	0.37277	0.00062	0
1	02:05:01	LD222_Rht17_NIL	T._durum_LD222_Rht17_NIL	Phosphorite	2021-03-24 14:51:41	147175	0.11854	0	0	0.08003	0.91997	0	0	222.455	231.765	169.554	0	0.00225	0.67328	0.32069	0.00378	0	21.906	661.594	0.016	233.673	2.6801	164.84	0.47187	0	0	0.00775	0.44658	0.54567	0	-0.1794	0	0.00118	0.97045	0.02837	0	0	-0.15173	0	0.00213	0.96951	0.02837	0	0
1	02:05:02	LD222_Rht17_NIL	T._durum_LD222_Rht17_NIL	Phosphorite	2021-03-24 14:51:41	415921	0.15897	0	0.00019	0.0268	0.97287	0.00014	0	226.251	266.731	155.921	0	0.00265	0.82838	0.16697	0.002	0	22.01	1838.31	0.045	661.718	2.66814	152.805	0.47832	0	0	0.00826	0.5099	0.48183	0	-0.13387	0	0.00013	0.93761	0.06226	0	0	-0.11993	0.00013	0.00163	0.93598	0.06226	0	0
1	02:05:03	LD222_Rht17_NIL	T._durum_LD222_Rht17_NIL	Phosphorite	2021-03-24 14:51:41	217978	0.26944	0	0	0.00839	0.97961	0.01201	0	249.306	269.078	134.923	0	0.01071	0.96794	0.02085	0.0005	0	14.121	874.342	0.022	170.53	4.0981	186.574	0.60916	0	0.00028	0	0.16629	0.83343	0	-0.09543	0	0.00147	0.84355	0.15151	0.00347	0	-0.04842	0	0.00113	0.84389	0.15395	0.00075	0.00028
1	02:06:01	LD222_(tall_wheat)	LD222_recurrent_parent_(tall)	Phosphorite	2021-03-24 14:51:41	415503	0.17366	0	0.0002	0.06034	0.93841	0.00106	0	264.938	293.231	153.709	0	0.0084	0.79347	0.19659	0.00154	0	23.985	1568.3	0.039	612.597	2.45983	154.94	0.50207	0	0.00016	0.01022	0.41212	0.5775	0	-0.13353	0.00048	0.01313	0.83205	0.15386	0.00049	0	-0.12629	0.00016	0.03192	0.81357	0.15435	0	0
1	02:06:02	LD222_(tall_wheat)	LD222_recurrent_parent_(tall)	Phosphorite	2021-03-24 14:51:41	247698	0.18685	0	0.00072	0.0113	0.98798	0	0	199.498	219.266	144.874	0	0.00539	0.90221	0.09063	0.00177	0	29.49	1241.6	0.031	584.534	2.03132	106.769	0.51409	0	0	0.01272	0.39613	0.59115	0	-0.10078	0	0.00074	0.8239	0.17536	0	0	-0.08305	0	0.00375	0.82089	0.17536	0	0
1	02:06:03	LD222_(tall_wheat)	LD222_recurrent_parent_(tall)	Phosphorite	2021-03-24 14:51:41	295950	0.2119	0	0	0.05219	0.94232	0.00549	0	265.756	272.926	137.4	0	0.01808	0.86928	0.11059	0.00205	0	28.439	1113.61	0.027	442.267	2.09972	160.394	0.51537	0	0	0.00729	0.43295	0.55976	0	-0.07295	0	0.00141	0.77799	0.21935	0.00125	0	-0.06244	0	0.00903	0.77037	0.2206	0	0
1	02:07:01	Chulpan_(rye)	S._cereale_Chulpan	KH2PO4	2021-03-24 14:51:41	235111	0.20719	0	0	0.02099	0.9785	0.0005	0	153.439	177.365	139.298	0	0.00742	0.89765	0.09432	0.00061	0	20.41	1532.27	0.038	472.836	2.86717	119.444	0.54255	0	0	0.00024	0.29076	0.709	0	-0.06835	0	0	0.71578	0.28422	0	0	-0.05899	0	0	0.71578	0.28422	0	0
1	02:07:02	Chulpan_(rye)	S._cereale_Chulpan	KH2PO4	2021-03-24 14:51:41	311274	0.14025	0	0	0.04892	0.95091	0.00017	0	213.069	244.167	155.533	0	0.00208	0.79674	0.20017	0.001	0	16.245	1460.91	0.036	377.757	3.57424	137.361	0.4337	0	0.00027	0.00798	0.63119	0.36056	0	-0.1064	0	0	0.93985	0.06015	0	0	-0.10195	0	0.00142	0.93843	0.06015	0	0
1	02:07:03	Chulpan_(rye)	S._cereale_Chulpan	KH2PO4	2021-03-24 14:51:41	383506	0.22049	0	9e-05	0.03435	0.96209	0.00348	0	169.647	186.042	126.257	0	0.02335	0.90984	0.06247	0.00434	0	27.978	2260.61	0.056	939.364	2.13144	122.402	0.50355	0.00017	0.00023	0.01982	0.38795	0.59183	0	-0.01452	0	0.00014	0.56901	0.43072	0.00013	0	-0.01798	0.00011	0.00356	0.56548	0.43051	0.00011	0.00023
1	02:08:01	LD222_Rht17_NIL	T._durum_LD222_Rht17_NIL	KH2PO4	2021-03-24 14:51:41	394106	0.16915	0	0	0.06119	0.93839	0.00042	0	215.399	270.316	153.97	0	0.01144	0.77184	0.21617	0.00056	0	19.335	1829.66	0.045	545.038	3.01994	145.097	0.51006	0	0	0.00815	0.37754	0.61431	0	-0.14007	0	0.01245	0.86281	0.12474	0	0	-0.12442	0	0.02219	0.85307	0.12474	0	0
1	02:08:02	LD222_Rht17_NIL	T._durum_LD222_Rht17_NIL	KH2PO4	2021-03-24 14:51:41	392380	0.2391	0	0.00013	0.01398	0.98535	0.00054	0	204.282	238.073	134.001	0	0.01301	0.94615	0.04039	0.00045	0	24.529	1920.78	0.047	697.606	2.40855	122.65	0.5393	0	0.00013	0.00869	0.28682	0.70436	0	-0.05716	0	0.00013	0.75274	0.24691	0.00023	0	-0.04195	0.00013	0.00082	0.75192	0.24544	0.00169	0
1	02:08:03	LD222_Rht17_NIL	T._durum_LD222_Rht17_NIL	KH2PO4	2021-03-24 14:51:41	249287	0.25157	0.00019	0	0.02851	0.96439	0.00691	0	173.233	181.66	129.501	0.00019	0.02033	0.9079	0.07009	0.00148	0	32.902	1439.03	0.036	725.479	1.84082	121.531	0.55023	0.00026	0	0.01247	0.25422	0.73306	0	-0.03432	0.00022	0.00087	0.6251	0.37348	0.00033	0	-0.03138	0.00137	0.00222	0.62259	0.37381	0	0
1	02:09:01	LD222_(tall_wheat)	LD222_recurrent_parent_(tall)	KH2PO4	2021-03-24 14:51:41	455324	0.20987	0	0	0.05308	0.94244	0.00447	0	235.404	267.621	148.264	0	0.01163	0.83688	0.14849	0.003	0	29.441	1934.23	0.048	883.278	2.03433	142.541	0.55333	0	0	0.00439	0.28343	0.71218	0	-0.1185	0	0.00405	0.80818	0.18687	0.0009	0	-0.09243	0	0.01255	0.79968	0.18763	0.00014	0
1	02:09:02	LD222_(tall_wheat)	LD222_recurrent_parent_(tall)	KH2PO4	2021-03-24 14:51:41	370370	0.22963	0	0	0.00433	0.99567	0	0	192.511	222.626	133.595	0	0.01815	0.94602	0.03571	0.00012	0	31.978	1923.89	0.047	970.712	1.88814	92.833	0.53245	0	0	0.00297	0.36587	0.63117	0	-0.05777	0	0	0.75082	0.24918	0	0	-0.04655	0	0	0.75082	0.24918	0	0
1	02:09:03	LD222_(tall_wheat)	LD222_recurrent_parent_(tall)	KH2PO4	2021-03-24 14:51:41	242084	0.24269	0	0.00074	0.02981	0.95557	0.01387	0	205.243	219.601	125.167	0.00046	0.04555	0.86375	0.08801	0.00223	0	30.412	1179.49	0.029	543.443	1.97532	156.031	0.51267	0	0.00047	0.02001	0.37283	0.60669	0	0.00811	0.00042	0.00533	0.49821	0.49371	0.00234	0	-0.01061	0.00246	0.01048	0.49102	0.49406	0.00173	0.00026
2	02:01:01	Chulpan_(rye)	S._cereale_Chulpan	w/o_P	2021-03-24 15:23:30	97606.1	0.15951	0.00086	0	0.03175	0.96611	0.00127	0	183.172	215.149	152.107	0	0.00596	0.8341	0.15942	0.00052	0	18.138	532.867	0.013	161.942	3.21194	127.586	0.49773	0	0	0.00052	0.43419	0.56529	0	-0.1027	0	0.00158	0.85745	0.14097	0	0	-0.095	0.00086	0.00223	0.85594	0.14097	0	0
2	02:01:02	Chulpan_(rye)	S._cereale_Chulpan	w/o_P	2021-03-24 15:23:30	160233	0.12693	0	0	0.0478	0.9522	0	0	226.892	250.257	154.22	0	0.00479	0.79842	0.19438	0.00241	0	10.212	706.211	0.017	115.926	5.63908	149.05	0.39476	0	0	0.00897	0.71318	0.27786	0	-0.09648	0	0	0.92669	0.07331	0	0	-0.09677	0	0	0.92669	0.07331	0	0
2	02:01:03	Chulpan_(rye)	S._cereale_Chulpan	w/o_P	2021-03-24 15:23:30	30133.1	0.12741	0	0	0.01394	0.98332	0.00274	0	162.132	168.586	155.195	0	0.00184	0.90248	0.09568	0	0	9.512	185.855	0.005	20.934	6.05001	105.489	0.42936	0	0	0	0.81552	0.18448	0	-0.12054	0	0	0.96188	0.03812	0	0	-0.1102	0	0	0.96188	0.03812	0	0
2	02:02:01	LD222_Rht17_NIL	T._durum_LD222_Rht17_NIL	w/o_P	2021-03-24 15:23:30	100054	0.22746	0	0	0.00987	0.99013	0	0	181.515	229.001	137.875	0	0.00683	0.96456	0.02861	0	0	12.727	551.216	0.014	108.733	4.53826	121.7	0.57836	0	0	0	0.18862	0.81138	0	-0.09449	0	0	0.88902	0.11098	0	0	-0.05665	0	0	0.88902	0.11098	0	0
2	02:02:02	LD222_Rht17_NIL	T._durum_LD222_Rht17_NIL	w/o_P	2021-03-24 15:23:30	203932	0.15647	0	0	0.01679	0.98321	0	0	215.895	294.776	155.521	0	0.00638	0.84459	0.14904	0	0	16.26	944.589	0.023	253.189	3.57111	150.825	0.50487	0	0	0.0006	0.45383	0.54557	0	-0.13997	0	0	0.95875	0.04097	0.00028	0	-0.109	0	0	0.95875	0.04097	0.00028	0
2	02:02:03	LD222_Rht17_NIL	T._durum_LD222_Rht17_NIL	w/o_P	2021-03-24 15:23:30	121888	0.21943	0	0	0.03361	0.96358	0.00281	0	202.003	209.832	140.743	0	0.00677	0.86741	0.12583	0	0	33.188	603.396	0.015	322.131	1.82678	115.912	0.55628	0	0	0	0.27634	0.72366	0	-0.07939	0	0	0.78358	0.21642	0	0	-0.06769	0	0.00072	0.78286	0.21642	0	0
2	02:03:01	LD222_(tall_wheat)	LD222_recurrent_parent_(tall)	w/o_P	2021-03-24 15:23:30	413698	0.17663	0	0.00066	0.04657	0.95278	0	0	256.563	294.706	152.7	0	0.00825	0.7889	0.20124	0.00161	0	25.89	1612.46	0.04	680.362	2.29005	158.831	0.50455	0	0	0.00035	0.43455	0.56511	0	-0.12364	0	0.00238	0.81674	0.18068	0.0002	0	-0.1062	0.00019	0.00174	0.81718	0.18052	0.00036	0
2	02:03:02	LD222_(tall_wheat)	LD222_recurrent_parent_(tall)	w/o_P	2021-03-24 15:23:30	392948	0.17919	0	0	0.01577	0.98423	0	0	242.55	274.368	147.98	0	0.00908	0.89447	0.09597	0.00049	0	25.082	1620.07	0.04	651.602	2.35881	139.081	0.48608	0	0	0.00782	0.43427	0.55791	0	-0.10668	0	0.00096	0.90214	0.0969	0	0	-0.08684	0	0	0.9031	0.0969	0	0
2	02:03:03	LD222_(tall_wheat)	LD222_recurrent_parent_(tall)	w/o_P	2021-03-24 15:23:30	215873	0.25248	0	0.00053	0.01657	0.9829	0	0	226.765	245.086	127.738	0	0.01929	0.9465	0.03158	0.00263	0	33.091	951.969	0.023	507.625	1.83152	152.574	0.57885	0	0	0.00659	0.17619	0.81722	0	-0.03982	0	0	0.72153	0.27847	0	0	-0.02479	0	0	0.72153	0.27756	0.00092	0
2	02:04:01	Chulpan_(rye)	S._cereale_Chulpan	Phosphorite	2021-03-24 15:23:30	175559	0.16957	0	0	0.02705	0.97295	0	0	160.652	186.493	149.091	0	0.00561	0.88375	0.11063	0	0	16.234	1092.79	0.027	286.028	3.57657	123.874	0.50172	0	0	0.00031	0.4031	0.59658	0	-0.10872	0	0	0.87853	0.12147	0	0	-0.08832	0	0.00122	0.87731	0.12147	0	0
2	02:04:02	Chulpan_(rye)	S._cereale_Chulpan	Phosphorite	2021-03-24 15:23:30	377290	0.16674	0	0	0.02291	0.97709	0	0	198.062	254.278	145.814	0	0.01097	0.89719	0.08999	0.00184	0	18.995	1904.91	0.047	528.664	3.07199	133.641	0.47043	0	0	0.00797	0.52017	0.47185	0	-0.09393	0	0	0.88752	0.11248	0	0	-0.07345	0	0.00027	0.88725	0.11248	0	0
2	02:04:03	Chulpan_(rye)	S._cereale_Chulpan	Phosphorite	2021-03-24 15:23:30	131272	0.21581	0	0	0.04331	0.95601	0.00068	0	101.202	147.157	126.486	0	0.04768	0.86744	0.07826	0.00662	0	33.947	1297.12	0.032	666.464	1.79066	77.671	0.47533	0	0	0.03859	0.41135	0.55006	0	0.00059	0	0.00052	0.54893	0.45055	0	0	-0.01263	0.00018	0.00208	0.54718	0.45034	0.00021	0
2	02:05:01	LD222_Rht17_NIL	T._durum_LD222_Rht17_NIL	Phosphorite	2021-03-24 15:23:30	288298	0.19343	0	0.00047	0.051	0.94694	0.00158	0	228.712	267.991	148.775	0.00016	0.01291	0.79638	0.1901	0.00045	0	21.793	1260.53	0.031	446.223	2.69329	176.218	0.52134	0	0.00043	0.00234	0.44901	0.54822	0	-0.11113	0	0.00137	0.82068	0.17795	0	0	-0.10328	0.0007	0.01568	0.80568	0.17735	0.00016	0.00043
2	02:05:02	LD222_Rht17_NIL	T._durum_LD222_Rht17_NIL	Phosphorite	2021-03-24 15:23:30	359810	0.17405	0	0	0.03096	0.96904	0	0	222.639	251.705	153.13	0.00014	0.00571	0.87813	0.11177	0.00425	0	24.922	1616.11	0.04	609.519	2.37297	153.494	0.49329	0	0	0.01303	0.40898	0.57799	0	-0.13855	0	0	0.95222	0.04778	0	0	-0.10497	0	0.00014	0.95208	0.04753	0.00025	0
2	02:05:03	LD222_Rht17_NIL	T._durum_LD222_Rht17_NIL	Phosphorite	2021-03-24 15:23:30	151549	0.18496	0	0	0.02194	0.97806	0	0	238.842	286.339	149.306	0	0.00343	0.89353	0.10236	0.00067	0	10.378	634.514	0.016	77.267	5.55017	148.661	0.52849	0	0	0.00173	0.32426	0.67402	0	-0.12426	0	0	0.91011	0.08989	0	0	-0.09307	0	0	0.91011	0.08989	0	0
2	02:06:01	LD222_(tall_wheat)	LD222_recurrent_parent_(tall)	Phosphorite	2021-03-24 15:23:30	355296	0.1316	0	0.00021	0.05765	0.94214	0	0	263.73	322.137	164.168	0	0.00643	0.71543	0.27502	0.00312	0	17.366	1347.19	0.033	379.365	3.35006	179.25	0.43994	0	0	0.00947	0.62802	0.3625	0	-0.1582	0	0	0.96595	0.03405	0	0	-0.14821	0	0.00172	0.96423	0.03405	0	0
2	02:06:02	LD222_(tall_wheat)	LD222_recurrent_parent_(tall)	Phosphorite	2021-03-24 15:23:30	487976	0.17401	0	0.00013	0.03564	0.96423	0	0	235.594	293.322	146.925	0	0.00664	0.88883	0.10362	0.0009	0	29.799	2071.26	0.051	913.949	2.01212	146.386	0.4695	0.00028	0.00061	0.02743	0.41362	0.55805	0	-0.09901	0	0.00044	0.88209	0.11747	0	0	-0.08654	0.00108	0.00192	0.87951	0.11697	0.00052	0
2	02:06:03	LD222_(tall_wheat)	LD222_recurrent_parent_(tall)	Phosphorite	2021-03-24 15:23:30	358594	0.17996	0	0.00095	0.07647	0.91983	0.00274	0	243.18	291.721	146.535	0	0.0143	0.83526	0.13642	0.01401	0	22.859	1474.6	0.036	549.002	2.57404	150.458	0.45795	0	0.00031	0.04583	0.46313	0.49074	0	-0.08383	0	0	0.84532	0.15468	0	0	-0.08225	0.0014	0.00391	0.84	0.15468	0	0
2	02:07:01	Chulpan_(rye)	S._cereale_Chulpan	KH2PO4	2021-03-24 15:23:30	245043	0.18732	0	0	0.04798	0.95128	0.00074	0	145.201	174.147	140.65	0.00044	0.00614	0.86964	0.1232	0.00059	0	19.851	1687.62	0.042	534.782	2.94455	108.71	0.50083	0	0	0.00124	0.43025	0.56851	0	-0.0751	0	0.01051	0.71478	0.27471	0	0	-0.07576	0.00029	0.0231	0.7019	0.27471	0	0
2	02:07:02	Chulpan_(rye)	S._cereale_Chulpan	KH2PO4	2021-03-24 15:23:30	330754	0.15241	0	0.00027	0.02891	0.97061	0.00022	0	198.916	230.831	154.727	0	0.00491	0.82557	0.16889	0.00063	0	18.721	1662.78	0.041	498.456	3.11535	130.797	0.48415	0	0	0.00531	0.50958	0.4851	0	-0.1216	0.00022	0.00075	0.92613	0.0729	0	0	-0.10093	0.00067	0.00179	0.92464	0.07277	0.00012	0
2	02:07:03	Chulpan_(rye)	S._cereale_Chulpan	KH2PO4	2021-03-24 15:23:30	573317	0.22403	0	0	0.03116	0.96679	0.00205	0	189.226	211.591	128.432	0	0.01711	0.92647	0.05405	0.00237	0	29.863	3029.8	0.075	1353.64	2.0082	137.015	0.51508	0	0	0.01221	0.38181	0.60598	0	-0.03138	0	0.00101	0.64554	0.35329	0.00015	0	-0.02762	0	0.00336	0.6432	0.35335	9e-05	0
2	02:08:01	LD222_Rht17_NIL	T._durum_LD222_Rht17_NIL	KH2PO4	2021-03-24 15:23:30	418190	0.17894	0	0	0.02669	0.96891	0.0044	0	231.77	265.577	156.171	0	0.00346	0.82413	0.1714	0.00101	0	17.893	1804.33	0.045	490.899	3.25438	154.806	0.525	0	0	0.00184	0.34243	0.65573	0	-0.15527	0	0.00053	0.89053	0.10894	0	0	-0.12354	0	0.00221	0.88884	0.10847	0.00047	0
2	02:08:02	LD222_Rht17_NIL	T._durum_LD222_Rht17_NIL	KH2PO4	2021-03-24 15:23:30	480472	0.21311	0	0	0.01151	0.98849	0	0	207.95	240.274	140.724	9e-05	0.0045	0.95155	0.04364	0.00022	0	22.362	2310.52	0.057	740.122	2.62818	126.32	0.52668	0	0	0.00858	0.29566	0.69576	0	-0.09357	0	0	0.8885	0.1115	0	0	-0.06783	0	0	0.8885	0.1115	0	0
2	02:08:03	LD222_Rht17_NIL	T._durum_LD222_Rht17_NIL	KH2PO4	2021-03-24 15:23:30	378442	0.25086	0	0	0.02116	0.97497	0.00387	0	180.158	186.479	129.75	0	0.02223	0.91426	0.06057	0.00294	0	30.729	2100.6	0.052	921.352	1.95695	124.124	0.54743	0.0002	0	0.0141	0.24611	0.73958	0	-0.04228	0	0.00051	0.67426	0.32457	0.00066	0	-0.0324	0	0.00206	0.67271	0.32443	0.0008	0
2	02:09:01	LD222_(tall_wheat)	LD222_recurrent_parent_(tall)	KH2PO4	2021-03-24 15:23:30	406820	0.21721	0	0	0.01605	0.98378	0.00018	0	213.816	231.408	140.588	0	0.0112	0.92458	0.06362	0.00061	0	29.461	1902.67	0.047	871.584	2.03309	125.242	0.54969	0	0	0.00467	0.27895	0.71638	0	-0.09592	0	0	0.82288	0.17712	0	0	-0.06737	0	0	0.82288	0.17712	0	0
2	02:09:02	LD222_(tall_wheat)	LD222_recurrent_parent_(tall)	KH2PO4	2021-03-24 15:23:30	432413	0.21058	0	0	0.01748	0.98252	0	0	197.134	223.013	137.393	0	0.01155	0.92505	0.06225	0.00115	0	32.36	2193.5	0.054	1006.18	1.86824	102.414	0.50589	0	0	0.00722	0.3632	0.62957	0	-0.06946	0	0	0.7805	0.2195	0	0	-0.05639	0	0	0.7805	0.2195	0	0
2	02:09:03	LD222_(tall_wheat)	LD222_recurrent_parent_(tall)	KH2PO4	2021-03-24 15:23:30	333203	0.24685	0	0	0.01585	0.98041	0.00374	0	200.093	217.295	124.292	0	0.03295	0.93268	0.03399	0.00038	0	26.466	1665.24	0.041	670.357	2.24371	137.898	0.52364	0	0	0.00478	0.35168	0.64354	0	-0.00161	0	0.00015	0.557	0.44267	0.00018	0	-0.00317	0	0.00153	0.55561	0.44171	0.00114	0
1	01:01:01	Chulpan_(rye)	S._cereale_Chulpan	w/o_P	2021-03-24 15:44:25	170781	0.14768	0	0	0.01487	0.98513	0	0	186.037	211.359	155.206	0	0.00449	0.84874	0.14677	0	0	24.34	917.996	0.023	367.125	2.42607	158.201	0.46434	0	0	0.00342	0.5466	0.44998	0	-0.12849	0	0	0.95252	0.0472	0.00028	0	-0.11538	0	0.00031	0.9522	0.0472	0.00028	0
1	01:01:02	Chulpan_(rye)	S._cereale_Chulpan	w/o_P	2021-03-24 15:44:25	150835	0.16717	0	0	0.0134	0.9866	0	0	176.152	218.519	148.292	0	0.00517	0.93955	0.05342	0.00187	0	17.946	856.275	0.021	266.977	3.24504	115.721	0.48715	0	0	0.01313	0.40962	0.57725	0	-0.11344	0	0	0.94169	0.05831	0	0	-0.08928	0	0.00445	0.93724	0.05831	0	0
1	01:01:03	Chulpan_(rye)	S._cereale_Chulpan	w/o_P	2021-03-24 15:44:25	85872.4	0.2255	0	0	0.00839	0.991	0.00061	0	150.694	185.162	129.867	0	0.01755	0.96687	0.01361	0.00197	0	15.885	569.844	0.014	134.32	3.65301	91.345	0.51854	0	0	0.00591	0.45963	0.53446	0	-0.05297	0	0.00057	0.74057	0.25776	0.0011	0	-0.02517	0	0.0007	0.74044	0.25483	0.00293	0.0011
1	01:02:01	LD222_Rht17_NIL	T._durum_LD222_Rht17_NIL	w/o_P	2021-03-24 15:44:25	208841	0.16269	0	0.00111	0.05525	0.94229	0.00136	0	210.135	261.833	155.69	0	0.00537	0.80661	0.18707	0.00095	0	20.401	993.843	0.025	314.479	2.86837	140.826	0.50418	0	0	0.00163	0.38381	0.61456	0	-0.14114	0	0.00124	0.91824	0.08052	0	0	-0.11703	0	0.00564	0.91384	0.08052	0	0
1	01:02:02	LD222_Rht17_NIL	T._durum_LD222_Rht17_NIL	w/o_P	2021-03-24 15:44:25	301104	0.11956	0	0	0.0462	0.9538	0	0	225.189	267.278	167.211	0	0.00315	0.77523	0.22107	0.00055	0	15.476	1337.11	0.033	328.131	3.74709	163.39	0.41796	0	0	0.01758	0.5545	0.42793	0	-0.15807	0	0.00027	0.97868	0.02105	0	0	-0.14749	0.00025	0.00192	0.97678	0.02105	0	0
1	01:02:03	LD222_Rht17_NIL	T._durum_LD222_Rht17_NIL	w/o_P	2021-03-24 15:44:25	184585	0.21955	0	0	0.06315	0.93478	0.00207	0	240.452	260.799	142.74	0	0.00985	0.83834	0.1506	0.00121	0	15.169	767.656	0.019	166.95	3.82116	178.632	0.55812	0	0	0	0.31843	0.68157	0	-0.10305	0	0.00034	0.84285	0.15642	0.00039	0	-0.07574	0	0.00304	0.84015	0.15635	0.00045	0
1	01:03:01	LD222_(tall_wheat)	LD222_recurrent_parent_(tall)	w/o_P	2021-03-24 15:44:25	275034	0.19444	0.00034	0.00066	0.02525	0.97351	0.00023	0	256.693	270.665	139.595	0	0.01852	0.86938	0.1102	0.0019	0	21.778	1071.45	0.026	387.04	2.69513	187.837	0.49932	0.001	0	0.00148	0.45045	0.54706	0	-0.07392	0	0.00066	0.78507	0.21427	0	0	-0.06008	0	0.00072	0.78501	0.21371	0.00056	0
1	01:03:02	LD222_(tall_wheat)	LD222_recurrent_parent_(tall)	w/o_P	2021-03-24 15:44:25	292174	0.21072	0.00024	0.00062	0.00832	0.99081	0	0	267.792	288.238	135.974	0	0.00765	0.93843	0.0534	0.00052	0	25.125	1091.05	0.027	419.729	2.35503	192.794	0.52846	0	0	0.00644	0.29322	0.70033	0	-0.06431	0	0.00046	0.80455	0.19499	0	0	-0.05302	0.00092	0.002	0.80209	0.19499	0	0
1	01:03:03	LD222_(tall_wheat)	LD222_recurrent_parent_(tall)	w/o_P	2021-03-24 15:44:25	244092	0.20582	0	0	0.06172	0.93436	0.00393	0	212.311	227.32	140.982	0	0.02841	0.84349	0.12731	0.00079	0	31.295	1149.69	0.028	533.279	1.92506	115.131	0.49229	0	0	0.01933	0.40971	0.57096	0	-0.07471	0	0.0004	0.76008	0.23841	0.00111	0	-0.07219	0	0.00742	0.75306	0.23813	0.00121	0.00018
1	01:04:01	Chulpan_(rye)	S._cereale_Chulpan	Phosphorite	2021-03-24 15:44:25	191171	0.19744	0	0	0.00716	0.99284	0	0	117.093	162.963	136.97	0	0.00722	0.95117	0.04127	0.00034	0	25.567	1632.64	0.04	651.553	2.31697	77.608	0.51412	0	0	0.00076	0.36861	0.63062	0	-0.07464	0	0	0.79895	0.20105	0	0	-0.05302	0	0	0.79895	0.20105	0	0
1	01:04:02	Chulpan_(rye)	S._cereale_Chulpan	Phosphorite	2021-03-24 15:44:25	395131	0.14288	0	0	0.02514	0.97455	0.00031	0	206.14	245.741	150.115	0	0.00794	0.85814	0.13241	0.00151	0	16.732	1916.81	0.047	463.072	3.47297	151.989	0.40269	0	0	0.01557	0.69666	0.28777	0	-0.08796	0	0.00051	0.87727	0.12221	0	0	-0.09183	0.00051	0.00158	0.87569	0.12206	0.00015	0
1	01:04:03	Chulpan_(rye)	S._cereale_Chulpan	Phosphorite	2021-03-24 15:44:25	228564	0.15808	0	0	0.03945	0.96055	0	0	184.65	242.822	143.592	0	0.01854	0.86746	0.10966	0.00434	0	24.986	1237.82	0.031	477.354	2.36729	129.762	0.44157	0	0	0.01524	0.56906	0.4157	0	-0.077	0	0	0.82416	0.17455	0.00129	0	-0.07041	0	0.00435	0.81981	0.17514	0.0007	0
1	01:05:01	LD222_Rht17_NIL	T._durum_LD222_Rht17_NIL	Phosphorite	2021-03-24 15:44:25	262934	0.17438	0	0.00046	0.04766	0.95188	0	0	190.076	208.818	152.824	0	0.00288	0.84691	0.14925	0.00096	0	24.923	1383.31	0.034	531.097	2.37288	119.165	0.55138	0	0	0.00036	0.2554	0.74424	0	-0.14405	0	0.00016	0.92562	0.07423	0	0	-0.10672	0	0.00034	0.92544	0.07423	0	0
1	01:05:02	LD222_Rht17_NIL	T._durum_LD222_Rht17_NIL	Phosphorite	2021-03-24 15:44:25	204468	0.19444	0	0	0.01192	0.98808	0	0	134.609	145.42	146.091	0	0.00947	0.90998	0.08056	0	0	36.809	1518.97	0.037	881.964	1.66897	72.964	0.54509	0	0	0.00397	0.26736	0.72867	0	-0.12277	0	0.00034	0.88191	0.11775	0	0	-0.08616	0.00034	0	0.88191	0.11775	0	0
1	01:05:03	LD222_Rht17_NIL	T._durum_LD222_Rht17_NIL	Phosphorite	2021-03-24 15:44:25	333126	0.18722	0	0.00041	0.06634	0.92812	0.00512	0	187.583	219.635	147.101	0	0.01768	0.84687	0.12803	0.00742	0	26.695	1775.89	0.044	682.257	2.22587	117.571	0.51005	0	0.0002	0.02864	0.33041	0.64076	0	-0.11471	0	0.00166	0.85407	0.14313	0.00114	0	-0.08763	0.00115	0.00856	0.84603	0.14284	0.00143	0
1	01:06:01	LD222_(tall_wheat)	LD222_recurrent_parent_(tall)	Phosphorite	2021-03-24 15:44:25	296520	0.1892	0.00077	0.00103	0.04125	0.95535	0.0016	0	230.601	280.758	144.936	0	0.01366	0.83255	0.1508	0.00299	0	26.24	1285.86	0.032	516.546	2.26159	169.208	0.51204	0	0	0.00339	0.41153	0.58508	0	-0.08626	0	0.00016	0.82286	0.17699	0	0	-0.0742	0.00132	0.00063	0.82106	0.17699	0	0
1	01:06:02	LD222_(tall_wheat)	LD222_recurrent_parent_(tall)	Phosphorite	2021-03-24 15:44:25	428510	0.21083	0	0.00028	0.02257	0.97715	0	0	218.561	232.417	140.861	0	0.00469	0.92349	0.07012	0.0017	0	28.094	1960.6	0.048	902.469	2.12339	140.822	0.53994	0	0	0.00911	0.31	0.68089	0	-0.0937	0	0.00141	0.81142	0.18717	0	0	-0.0735	0.00115	0.00674	0.80494	0.18681	0.00035	0
1	01:06:03	LD222_(tall_wheat)	LD222_recurrent_parent_(tall)	Phosphorite	2021-03-24 15:44:25	72268.1	0.25083	0	0	0.00289	0.99383	0.00328	0	238.843	245.186	129.257	0	0.02417	0.96852	0.00732	0	0	18.705	302.575	0.007	92.344	3.11791	113.627	0.53084	0	0	0.00838	0.3414	0.65022	0	-0.05336	0	0	0.76384	0.23518	0.00098	0	-0.02822	0	0	0.76384	0.23616	0	0
1	01:07:01	Chulpan_(rye)	S._cereale_Chulpan	KH2PO4	2021-03-24 15:44:25	326543	0.20872	0	0	0.01179	0.98821	0	0	143.84	167.048	138.325	0	0.00382	0.94114	0.05494	0.00011	0	29.767	2270.18	0.056	1007.9	2.01409	122.234	0.52853	0	0	0.00253	0.35079	0.64668	0	-0.08319	0	0	0.80523	0.19477	0	0	-0.06164	0	0.0027	0.80253	0.19413	0.0004	0.00023
1	01:07:02	Chulpan_(rye)	S._cereale_Chulpan	KH2PO4	2021-03-24 15:44:25	308879	0.18426	0	0	0.01661	0.98325	0.00014	0	184.314	203.336	137.649	0.00012	0.01788	0.91753	0.06347	0.00099	0	16.504	1675.83	0.041	438.142	3.51974	137.508	0.44448	0	0	0.00878	0.61925	0.37197	0	-0.05374	0	0	0.73871	0.26129	0	0	-0.05822	0	0.00057	0.73814	0.26129	0	0
1	01:07:03	Chulpan_(rye)	S._cereale_Chulpan	KH2PO4	2021-03-24 15:44:25	461926	0.22534	0	0.00039	0.01855	0.9712	0.00986	0	192.591	241.442	133.861	0	0.01614	0.9162	0.06669	0.00097	0	20.111	2398.48	0.059	739.34	2.90808	134.571	0.51439	0	0	0.00494	0.44297	0.55209	0	-0.04142	0	0.0016	0.69625	0.3	0.00215	0	-0.04057	0.0002	0.00096	0.69669	0.3015	0.00065	0
1	01:08:01	LD222_Rht17_NIL	T._durum_LD222_Rht17_NIL	KH2PO4	2021-03-24 15:44:25	295370	0.24914	0	0	0.01936	0.97603	0.00461	0	195.04	252.677	132.204	0	0.0165	0.91041	0.07137	0.00172	0	17.192	1514.41	0.037	402.714	3.38275	137.759	0.57394	0	0	0.00138	0.24525	0.75336	0	-0.04326	0	0	0.66469	0.33512	0.0002	0	-0.03618	0	0	0.66469	0.33502	0.00029	0
1	01:08:02	LD222_Rht17_NIL	T._durum_LD222_Rht17_NIL	KH2PO4	2021-03-24 15:44:25	337800	0.22047	0	0.00017	0.02945	0.96865	0.00173	0	123.48	159.957	138.92	0	0.00708	0.90129	0.08897	0.00266	0	31.009	2735.66	0.067	1206.39	1.941	77.983	0.51082	0	0	0.01774	0.30756	0.6747	0	-0.06646	0	0	0.7581	0.24181	0.0001	0	-0.05981	9e-05	0.00094	0.75708	0.2419	0	0
1	01:08:03	LD222_Rht17_NIL	T._durum_LD222_Rht17_NIL	KH2PO4	2021-03-24 15:44:25	270051	0.26092	0	0	0.01615	0.97626	0.00759	0	234.192	247.174	128.227	0	0.0293	0.91947	0.04954	0.00169	0	22.12	1153.11	0.028	406.302	2.65553	178.7	0.54205	0	0	0.01348	0.31504	0.67148	0	-0.02837	0.00024	0.0006	0.63379	0.3645	0.00086	0	-0.02165	0.00044	0.0002	0.634	0.36338	0.00164	0.00034
1	01:09:01	LD222_(tall_wheat)	LD222_recurrent_parent_(tall)	KH2PO4	2021-03-24 15:44:25	273197	0.22961	0	0	0.01109	0.98832	0.00059	0	203.074	218.225	134.009	0	0.01089	0.94164	0.04644	0.00103	0	31.312	1345.31	0.033	685.165	1.92409	113.219	0.56276	0	0.00053	0.00507	0.21914	0.77526	0	-0.07037	0	0	0.76717	0.23283	0	0	-0.04596	0.00029	0.00063	0.76625	0.23233	0.0005	0
1	01:09:02	LD222_(tall_wheat)	LD222_recurrent_parent_(tall)	KH2PO4	2021-03-24 15:44:25	470868	0.22095	0	0	0.01222	0.9873	0.00049	0	192.297	241.293	136.309	0	0.01078	0.91498	0.07367	0.00058	0	29.472	2448.65	0.06	1181.72	2.03242	117.183	0.52318	0	0	0.0021	0.37872	0.61917	0	-0.06222	0	0	0.73212	0.26741	0.00048	0	-0.05492	0	0.00034	0.73178	0.26788	0	0
1	01:09:03	LD222_(tall_wheat)	LD222_recurrent_parent_(tall)	KH2PO4	2021-03-24 15:44:25	266667	0.24565	0	0.00102	0.0286	0.96509	0.00529	0	170.663	182.988	128.179	0	0.02635	0.88897	0.08132	0.00336	0	28.865	1562.54	0.039	709.347	2.07133	98.677	0.50574	0	0	0.01902	0.3423	0.63868	0	-0.0038	0	0	0.54733	0.4509	0.00178	0	-0.02035	0	0.0014	0.54592	0.45125	0.00072	0.00071
2	01:01:01	Chulpan_(rye)	S._cereale_Chulpan	w/o_P	2021-03-24 15:51:18	179587	0.15389	0	0	0.01069	0.98931	0	0	160.626	185.57	148.12	0	0.00358	0.89168	0.10474	0	0	18.345	1118.04	0.028	308.781	3.17697	132.382	0.46795	0	0	0.00387	0.55157	0.44456	0	-0.09804	0	0	0.91403	0.08597	0	0	-0.08321	0	0	0.91403	0.08579	0.00018	0
2	01:01:02	Chulpan_(rye)	S._cereale_Chulpan	w/o_P	2021-03-24 15:51:18	114252	0.14802	0	0	0.01245	0.98755	0	0	180.119	195.154	147.149	0	0.01149	0.88652	0.10199	0	0	14.573	634.313	0.016	154.282	3.9737	138.211	0.46474	0	0	0	0.57804	0.42196	0	-0.08655	0	0	0.82907	0.17094	0	0	-0.07676	0	0	0.82907	0.17094	0	0
2	01:01:03	Chulpan_(rye)	S._cereale_Chulpan	w/o_P	2021-03-24 15:51:18	67426.5	0.17014	0	0	0.00479	0.99521	0	0	153.668	144.884	140.714	0	0.01385	0.96126	0.02489	0	0	11.124	438.78	0.011	62.683	5.18204	112.201	0.49399	0	0	0.00187	0.46999	0.52814	0	-0.08647	0	0	0.90034	0.09966	0	0	-0.06165	0	0	0.90034	0.09966	0	0
2	01:02:01	LD222_Rht17_NIL	T._durum_LD222_Rht17_NIL	w/o_P	2021-03-24 15:51:18	195653	0.1403	0	0.00117	0.04596	0.95287	0	0	226.543	264.244	161.863	0	0.00712	0.76631	0.22392	0.00265	0	17.095	863.646	0.021	232.018	3.40145	166.064	0.47629	0	0.00079	0.00292	0.5414	0.45489	0	-0.16318	0	0	0.94908	0.05092	0	0	-0.1423	0.00079	0.00839	0.9399	0.05092	0	0
2	01:02:02	LD222_Rht17_NIL	T._durum_LD222_Rht17_NIL	w/o_P	2021-03-24 15:51:18	167520	0.16084	0	0	0.0279	0.9721	0	0	221.369	251.578	158.06	0	0.00254	0.86087	0.1323	0.00429	0	17.599	756.747	0.019	227.387	3.30706	147.906	0.49721	0	0	0.00944	0.37736	0.6132	0	-0.16413	0	0.00028	0.96253	0.03719	0	0	-0.1294	0	0.00459	0.95822	0.03719	0	0
2	01:02:03	LD222_Rht17_NIL	T._durum_LD222_Rht17_NIL	w/o_P	2021-03-24 15:51:18	172641	0.21924	0	0	0.01151	0.98849	0	0	225.835	247.361	141.481	0	0.01407	0.9564	0.02954	0	0	11.823	764.454	0.019	113.838	4.87959	156.511	0.58146	0	0	0	0.19155	0.80845	0	-0.113	0	0	0.89129	0.10871	0	0	-0.06821	0	0	0.89129	0.10871	0	0
2	01:03:01	LD222_(tall_wheat)	LD222_recurrent_parent_(tall)	w/o_P	2021-03-24 15:51:18	264504	0.16834	0	0	0.0349	0.9651	0	0	264.762	291.236	152.089	0	0.00703	0.87033	0.12036	0.00228	0	22.945	999.026	0.025	370.776	2.56491	200.114	0.49611	0	0	0.0033	0.40842	0.58828	0	-0.12841	0	0.0009	0.92308	0.07602	0	0	-0.10268	0.00074	0.00119	0.92205	0.07602	0	0
2	01:03:02	LD222_(tall_wheat)	LD222_recurrent_parent_(tall)	w/o_P	2021-03-24 15:51:18	379829	0.16789	0	0.00112	0.04828	0.94997	0.00064	0	271.763	291.143	152.406	0	0.01944	0.81518	0.15932	0.00606	0	22.491	1397.65	0.034	520.837	2.61394	196.416	0.4563	0	0.00096	0.01956	0.52315	0.45634	0	-0.11505	0	0.00226	0.89978	0.09771	0.00025	0	-0.10845	0.00218	0.00445	0.8954	0.09722	0.00049	0.00025
2	01:03:03	LD222_(tall_wheat)	LD222_recurrent_parent_(tall)	w/o_P	2021-03-24 15:51:18	183817	0.22223	0	0	0.0692	0.92879	0.00201	0	177.878	224.06	136.429	0	0.01318	0.88275	0.10172	0.00235	0	32.478	1033.39	0.025	533.466	1.86217	72.303	0.5392	0	0	0.0094	0.29564	0.69497	0	-0.06713	0	0.00017	0.78252	0.21731	0	0	-0.05238	0.00031	0.00302	0.77936	0.21731	0	0
2	01:04:01	Chulpan_(rye)	S._cereale_Chulpan	Phosphorite	2021-03-24 15:51:18	214980	0.15029	0	0	0.06317	0.93683	0	0	134.982	161.417	154.707	0	0.00887	0.79256	0.19857	0	0	25.385	1592.65	0.039	624.797	2.33251	87.908	0.47432	0	0	0.00291	0.52719	0.4699	0	-0.13976	0	0.00831	0.89526	0.09643	0	0	-0.12536	0	0.01573	0.88784	0.09625	0.00019	0
2	01:04:02	Chulpan_(rye)	S._cereale_Chulpan	Phosphorite	2021-03-24 15:51:18	224020	0.20314	0	0	0.00039	0.99961	0	0	206.736	247.263	141.102	0	0.00086	0.98107	0.01807	0	0	17.04	1083.6	0.027	303.352	3.412	150.261	0.52442	0	0	0.00043	0.33415	0.66542	0	-0.10419	0	0	0.94863	0.05138	0	0	-0.07244	0	0	0.94863	0.05138	0	0
2	01:04:03	Chulpan_(rye)	S._cereale_Chulpan	Phosphorite	2021-03-24 15:51:18	188627	0.17058	0	0	0.03073	0.96927	0	0	163.825	197.182	140.03	0	0.01692	0.90237	0.07609	0.00462	0	22.535	1151.39	0.028	382.226	2.60904	112.156	0.47201	0	0	0.01491	0.50888	0.47621	0	-0.07341	0	0	0.82037	0.17963	0	0	-0.05916	0	0	0.82037	0.17963	0	0
2	01:05:01	LD222_Rht17_NIL	T._durum_LD222_Rht17_NIL	Phosphorite	2021-03-24 15:51:18	209320	0.14797	0	0	0.0587	0.9413	0	0	227.522	251.813	160.89	0	0.00527	0.78634	0.20817	0.00021	0	19.433	920.001	0.023	286.976	3.0053	170.347	0.50867	0	0	0.00408	0.39287	0.60305	0	-0.15781	0	0	0.93682	0.06318	0	0	-0.12955	0	0.004	0.93282	0.06318	0	0
2	01:05:02	LD222_Rht17_NIL	T._durum_LD222_Rht17_NIL	Phosphorite	2021-03-24 15:51:18	189664	0.15692	0	0	0.04873	0.95127	0	0	129.499	154.208	151.213	0.00016	0.00905	0.8418	0.14689	0.00209	0	34.43	1464.6	0.036	819.915	1.7686	80.929	0.42095	0	0.00027	0.02954	0.53516	0.43502	0	-0.10305	0	0	0.91717	0.08283	0	0	-0.09205	0.0011	0.00229	0.91378	0.08191	0.00092	0
2	01:05:03	LD222_Rht17_NIL	T._durum_LD222_Rht17_NIL	Phosphorite	2021-03-24 15:51:18	214854	0.21755	0	0	0.03884	0.96116	0	0	181.278	214.864	135.425	0	0.03327	0.89509	0.07048	0.00116	0	30.264	1185.22	0.029	559.186	1.98407	115.842	0.52365	0	0	0.00993	0.3718	0.61828	0	-0.07694	0	0.00191	0.77537	0.22272	0	0	-0.05406	0	0.01716	0.76012	0.22189	0.00082	0
2	01:06:01	LD222_(tall_wheat)	LD222_recurrent_parent_(tall)	Phosphorite	2021-03-24 15:51:18	234348	0.16602	0	0	0.10293	0.89624	0.00082	0	241.106	279.006	152.38	0	0.01004	0.72779	0.26166	0.00051	0	27.002	971.971	0.024	424.713	2.20238	185.662	0.50618	0	0	0.00884	0.41438	0.57678	0	-0.12456	0	0.02774	0.77034	0.20161	0.00031	0	-0.12662	0.00087	0.06151	0.73569	0.20192	0	0
2	01:06:02	LD222_(tall_wheat)	LD222_recurrent_parent_(tall)	Phosphorite	2021-03-24 15:51:18	340296	0.176	0	0.00016	0.08295	0.91666	0.00022	0	215.559	228.924	149.223	0	0.01361	0.83497	0.14344	0.00798	0	26.359	1578.67	0.039	681.991	2.25212	142.498	0.46963	0	0	0.04071	0.39222	0.56707	0	-0.1003	0	0	0.89181	0.10796	0.00023	0	-0.0797	0.00032	0.00457	0.88692	0.10796	0.00023	0
2	01:06:03	LD222_(tall_wheat)	LD222_recurrent_parent_(tall)	Phosphorite	2021-03-24 15:51:18	100940	0.15738	0	0	0.05124	0.94876	0	0	241.57	266.937	146.667	0	0.01403	0.87524	0.10604	0.00469	0	16.068	417.849	0.01	107.337	3.61244	148.106	0.38653	0	0	0.05286	0.66207	0.28507	0	-0.08613	0	0	0.84887	0.15113	0	0	-0.08178	0	0.00551	0.84337	0.14881	0.00232	0
2	01:07:01	Chulpan_(rye)	S._cereale_Chulpan	KH2PO4	2021-03-24 15:51:18	266803	0.18904	0	0	0.02203	0.97797	0	0	143.618	187.793	144.256	0	0.00314	0.90523	0.09087	0.00075	0	29.888	1857.72	0.046	875.346	2.00668	121.639	0.5255	0	0	0	0.36079	0.63921	0	-0.10574	0	0	0.88651	0.11349	0	0	-0.07737	0	0	0.88651	0.11349	0	0
2	01:07:02	Chulpan_(rye)	S._cereale_Chulpan	KH2PO4	2021-03-24 15:51:18	281535	0.20086	0	0	0.00614	0.99336	0.0005	0	176.485	217.907	133.796	0	0.00927	0.95307	0.03766	0	0	18.272	1595.24	0.039	450.493	3.18917	139.345	0.46232	0	0	0.01482	0.52794	0.45725	0	-0.04895	0	0	0.76394	0.23606	0	0	-0.04379	0	0.00017	0.76377	0.23539	0.00024	0.00042
2	01:07:03	Chulpan_(rye)	S._cereale_Chulpan	KH2PO4	2021-03-24 15:51:18	378493	0.25325	0	0	0.01162	0.97542	0.01296	0	196.183	255.284	129.994	0.00043	0.028	0.93388	0.03567	0.00203	0	19.347	1929.29	0.048	542.932	3.01818	126.366	0.55206	0	0.00088	0.016	0.28356	0.69956	0	-0.0479	0	0	0.72428	0.27368	0.00204	0	-0.02733	0	0	0.72428	0.27295	0.002	0.00077
2	01:08:01	LD222_Rht17_NIL	T._durum_LD222_Rht17_NIL	KH2PO4	2021-03-24 15:51:18	353895	0.17094	0	0.00078	0.06837	0.92977	0.00108	0	215.386	258.986	153.804	0	0.01112	0.74904	0.23856	0.00128	0	14.18	1643.07	0.041	362.1	4.0815	153.939	0.51503	0	0	0.00142	0.46302	0.53555	0	-0.12733	0	0.00749	0.83988	0.15092	0.00171	0	-0.11387	0	0.01261	0.83476	0.15263	0	0
2	01:08:02	LD222_Rht17_NIL	T._durum_LD222_Rht17_NIL	KH2PO4	2021-03-24 15:51:18	236876	0.21917	0	0.0001	0.01418	0.98571	0	0	114.763	185.657	136.786	0	0.00758	0.93608	0.05497	0.00137	0	33.694	2064.05	0.051	1092.51	1.8025	68.992	0.48988	0	0	0.01512	0.37831	0.60657	0	-0.06918	0	0	0.80355	0.19645	0	0	-0.05547	0.00012	0.00048	0.80295	0.19633	0	0.00013
2	01:08:03	LD222_Rht17_NIL	T._durum_LD222_Rht17_NIL	KH2PO4	2021-03-24 15:51:18	140781	0.2556	0	0	0.0095	0.98988	0.00062	0	236.318	258.736	127.877	0	0.02913	0.92388	0.04457	0.00242	0	17.783	595.727	0.015	176.626	3.27393	200.485	0.53921	0	0.00052	0.01577	0.27047	0.71324	0	-0.0263	0	0.00093	0.62051	0.37856	0	0	-0.02181	0	0.00152	0.61992	0.37654	0.00201	0
2	01:09:01	LD222_(tall_wheat)	LD222_recurrent_parent_(tall)	KH2PO4	2021-03-24 15:51:18	317914	0.21618	0	0	0.01637	0.98303	0.00061	0	202.7	222.24	137.115	0	0.01179	0.92191	0.06538	0.00092	0	28.611	1568.39	0.039	702.299	2.08818	137.384	0.54164	0	0	0.00041	0.32022	0.67937	0	-0.07182	0	0.00018	0.7739	0.22576	0.00016	0	-0.053	0	0	0.77408	0.22592	0	0
2	01:09:02	LD222_(tall_wheat)	LD222_recurrent_parent_(tall)	KH2PO4	2021-03-24 15:51:18	436407	0.19482	0.00022	0	0.02982	0.96986	0.0001	0	195.406	243.29	141.231	0	0.01156	0.90174	0.08551	0.00118	0	27.598	2233.33	0.055	969.242	2.15845	120.663	0.48116	0	0	0.01209	0.40116	0.58675	0	-0.07541	0	0.00018	0.8274	0.17242	0	0	-0.06598	0.0004	0.00072	0.82645	0.17242	0	0
2	01:09:03	LD222_(tall_wheat)	LD222_recurrent_parent_(tall)	KH2PO4	2021-03-24 15:51:18	249976	0.26927	0	0	0.03416	0.96014	0.0057	0	166.817	180.601	124.948	0	0.03367	0.90946	0.05347	0.0034	0	28.76	1498.51	0.037	669.531	2.07826	98.763	0.5274	0	0	0.01899	0.2826	0.69841	0	4e-05	0	0	0.57864	0.42115	0.00021	0	-0.01032	0.00042	0.00332	0.5749	0.42021	0.00115	0
1	01:01:01	Chulpan_(rye)	S._cereale_Chulpan	w/o_P	2021-03-26 16:09:29	279106	0.09606	0	0.00032	0.04123	0.95845	0	0	197.568	222.341	168.932	0	0.00465	0.69568	0.29794	0.00173	0	15.555	1412.71	0.035	348.287	3.72859	139.084	0.39593	0	0	0.00278	0.80528	0.19194	0	-0.13846	0	0	0.95425	0.04575	0	0	-0.14407	0	0	0.95425	0.04575	0	0
1	01:01:02	Chulpan_(rye)	S._cereale_Chulpan	w/o_P	2021-03-26 16:09:29	209939	0.10035	0	0	0.04259	0.95741	0	0	196.662	228.625	164.951	0	0.01195	0.78286	0.2049	0.00029	0	11.499	1067.51	0.026	186.092	5.01524	138.298	0.3701	0	0	0.01452	0.82495	0.16054	0	-0.12021	0	0	0.9434	0.0566	0	0	-0.12444	0	0.00061	0.94279	0.0566	0	0
1	01:01:03	Chulpan_(rye)	S._cereale_Chulpan	w/o_P	2021-03-26 16:09:29	68946.1	0.17997	0	0	0.00833	0.99167	0	0	174.904	182.023	137.714	0	0.01248	0.95997	0.02755	0	0	10.801	394.195	0.01	50.549	5.33508	108.671	0.49738	0	0	0.0072	0.38919	0.60361	0	-0.07177	0	0	0.8639	0.1361	0	0	-0.0469	0	0	0.8639	0.13292	0.00318	0
1	01:02:01	LD222_Rht17_NIL	T._durum_LD222_Rht17_NIL	w/o_P	2021-03-26 16:09:29	221409	0.1733	0	0.00042	0.04132	0.95715	0.00111	0	249.184	300.951	151.769	0	0.01137	0.80397	0.18151	0.00316	0	17.398	888.538	0.022	252.73	3.34407	178.307	0.53196	0	0	0.00195	0.33024	0.6678	0	-0.12267	0	0	0.88967	0.11008	0.00026	0	-0.09285	0	0.00178	0.88789	0.11008	0.00026	0
1	01:02:02	LD222_Rht17_NIL	T._durum_LD222_Rht17_NIL	w/o_P	2021-03-26 16:09:29	273974	0.15179	0.0004	0.00075	0.03205	0.9668	0	0	224.833	256.716	156.9	0	0.00723	0.76757	0.225	0.00019	0	17.757	1218.57	0.03	337.72	3.27856	154.149	0.47369	0	0	0.00436	0.47796	0.51768	0	-0.13167	0.00067	0.00291	0.92461	0.07182	0	0	-0.11842	0.00067	0.00231	0.92521	0.07159	0.00023	0
1	01:02:03	LD222_Rht17_NIL	T._durum_LD222_Rht17_NIL	w/o_P	2021-03-26 16:09:29	115443	0.16629	0	0	0.00526	0.99474	0	0	264.364	280.261	149.251	0	0.00859	0.94021	0.05059	0.00061	0	14.952	436.681	0.011	92.763	3.87515	149.004	0.54005	0	0	0.00217	0.26708	0.73075	0	-0.12417	0	0.00106	0.94834	0.0506	0	0	-0.08304	0	0	0.9494	0.0506	0	0
1	01:03:01	LD222_(tall_wheat)	LD222_recurrent_parent_(tall)	w/o_P	2021-03-26 16:09:29	267510	0.20423	0	0	0.02774	0.97226	0	0	251.067	257.298	138.28	0	0.01722	0.89908	0.08269	0.00101	0	27.512	1065.49	0.026	465.65	2.16467	184.684	0.5374	0	0	0.00072	0.34647	0.65281	0	-0.07453	0	0.00066	0.79088	0.20846	0	0	-0.05801	0	0.00066	0.79088	0.20846	0	0
1	01:03:02	LD222_(tall_wheat)	LD222_recurrent_parent_(tall)	w/o_P	2021-03-26 16:09:29	406626	0.16459	0	0	0.03826	0.96153	0.00021	0	267.787	286.111	148.929	0	0.00596	0.87039	0.11903	0.00462	0	25.456	1518.47	0.037	637.891	2.32643	179.109	0.45827	0	0	0.01197	0.46442	0.52361	0	-0.10383	0	0	0.89697	0.10303	0	0	-0.08626	0	0.00026	0.89671	0.10303	0	0
1	01:03:03	LD222_(tall_wheat)	LD222_recurrent_parent_(tall)	w/o_P	2021-03-26 16:09:29	222753	0.2045	0	0	0.04001	0.95875	0.00124	0	207.213	243.396	141.116	0.00053	0.0104	0.88732	0.09913	0.00262	0	32.064	1075	0.027	554.154	1.88361	109.873	0.53927	0	0	0.01082	0.31389	0.67529	0	-0.0962	0	0.00017	0.85061	0.14922	0	0	-0.07019	0	0.00053	0.85025	0.14922	0	0
1	01:04:01	Chulpan_(rye)	S._cereale_Chulpan	Phosphorite	2021-03-26 16:09:29	217220	0.17228	0	0	0.03608	0.96392	0	0	174.078	209.385	145.074	0	0.00596	0.85745	0.13598	0.0006	0	15.806	1247.83	0.031	318.024	3.67076	137.253	0.47964	0	0	0	0.52442	0.47558	0	-0.083	0	0	0.85477	0.14523	0	0	-0.07577	0	0.00062	0.85415	0.14523	0	0
1	01:04:02	Chulpan_(rye)	S._cereale_Chulpan	Phosphorite	2021-03-26 16:09:29	307729	0.13	0	0	0.03058	0.96942	0	0	214.602	261.383	154.597	0	0.00662	0.813	0.17992	0.00047	0	11.758	1433.95	0.035	263.151	4.90644	145.156	0.41339	0	0	0.00867	0.64518	0.34615	0	-0.1028	0	0	0.93105	0.06895	0	0	-0.09938	0	0	0.93105	0.06895	0	0
1	01:04:03	Chulpan_(rye)	S._cereale_Chulpan	Phosphorite	2021-03-26 16:09:29	161365	0.15471	0	0	0.01538	0.98462	0	0	164.551	212.567	146.218	0	0.01253	0.92223	0.06408	0.00116	0	19.376	980.642	0.024	293.266	3.01382	101.797	0.49937	0	0	0.00109	0.49526	0.50365	0	-0.09796	0	0	0.91734	0.08266	0	0	-0.07078	0	0	0.91734	0.08266	0	0
1	01:05:01	LD222_Rht17_NIL	T._durum_LD222_Rht17_NIL	Phosphorite	2021-03-26 16:09:29	169932	0.18164	0	0	0.04335	0.95665	0	0	240.982	267.692	151.952	0	0.01116	0.78547	0.20277	0.0006	0	18.01	705.165	0.017	204.491	3.23403	152.502	0.51857	0	0	0.00373	0.43195	0.56432	0	-0.12424	0	0.00043	0.89633	0.10324	0	0	-0.09929	0.00043	0.00111	0.89522	0.10207	0.00117	0
1	01:05:02	LD222_Rht17_NIL	T._durum_LD222_Rht17_NIL	Phosphorite	2021-03-26 16:09:29	233761	0.17649	0	0	0.01932	0.98044	0.00024	0	211.711	238.842	152.406	0	0.00371	0.86876	0.12661	0.00092	0	18.509	1104.15	0.027	338.436	3.14973	140.483	0.54322	0	0	0.00069	0.31499	0.68432	0	-0.13425	0	0.00017	0.91383	0.086	0	0	-0.09596	0	0.00054	0.91346	0.086	0	0
1	01:05:03	LD222_Rht17_NIL	T._durum_LD222_Rht17_NIL	Phosphorite	2021-03-26 16:09:29	224788	0.1627	0	0.00075	0.0455	0.95376	0	0	213.033	252.941	149.943	0.00048	0.01631	0.8232	0.14959	0.01041	0	16.473	1055.18	0.026	263.145	3.52603	149.117	0.49109	0	0	0.0202	0.43198	0.54782	0	-0.11024	0	0	0.8919	0.10759	0.00051	0	-0.08847	0	0	0.8919	0.10627	0.00146	0.00036
1	01:06:01	LD222_(tall_wheat)	LD222_recurrent_parent_(tall)	Phosphorite	2021-03-26 16:09:29	350519	0.15183	0	0	0.07553	0.92414	0.00033	0	228.807	267.065	157.509	0	0.00896	0.75071	0.23977	0.00056	0	22.094	1531.94	0.038	510.404	2.65845	146.65	0.49483	0	0	0.00112	0.49451	0.50437	0	-0.13704	0	0	0.89112	0.1087	0.00019	0	-0.12257	0	0.00501	0.88611	0.10854	0.00035	0
1	01:06:02	LD222_(tall_wheat)	LD222_recurrent_parent_(tall)	Phosphorite	2021-03-26 16:09:29	412345	0.19424	0	0	0.01978	0.98007	0.00016	0	200.726	207.539	145.107	0	0.01092	0.90156	0.08695	0.00056	0	30.735	2054.27	0.051	916.459	1.95661	131.069	0.51347	0	0	0.00907	0.42458	0.56636	0	-0.09944	0	0.00024	0.81937	0.18039	0	0	-0.08218	0.00024	0.00101	0.81836	0.18039	0	0
1	01:06:03	LD222_(tall_wheat)	LD222_recurrent_parent_(tall)	Phosphorite	2021-03-26 16:09:29	193568	0.16723	0	0	0.10331	0.8951	0.00159	0	220.747	247.47	148.249	0.0003	0.01168	0.79797	0.18301	0.00704	0	26.808	876.878	0.022	386.789	2.21715	110.558	0.40511	0	0	0.05637	0.55107	0.39255	0	-0.07937	0	0	0.81497	0.1839	0.00113	0	-0.08578	0	0.00301	0.81196	0.18381	0.00122	0
1	01:07:01	Chulpan_(rye)	S._cereale_Chulpan	KH2PO4	2021-03-26 16:09:29	367814	0.17907	0	0.00039	0.02034	0.97927	0	0	183.943	219.997	143.696	0	0.01246	0.89907	0.08786	0.00061	0	19.381	1999.61	0.049	620.925	3.01319	131.074	0.49283	0.00043	0	0.00124	0.45339	0.54494	0	-0.08782	0	0.00121	0.80944	0.18919	0.00016	0	-0.07106	0.00048	0.00083	0.80933	0.18936	0	0
1	01:07:02	Chulpan_(rye)	S._cereale_Chulpan	KH2PO4	2021-03-26 16:09:29	532137	0.17803	0	0	0.02469	0.97531	0	0	218.516	266.798	141.43	0.00021	0.00986	0.91277	0.07572	0.00145	0	18.897	2435.23	0.06	723.665	3.08739	159.984	0.44668	0	0	0.01054	0.52866	0.4608	0	-0.07064	0	9e-05	0.83691	0.16299	0	0	-0.06513	0.00016	0.00071	0.83614	0.16299	0	0
1	01:07:03	Chulpan_(rye)	S._cereale_Chulpan	KH2PO4	2021-03-26 16:09:29	450744	0.23038	0	0.00023	0.02119	0.97104	0.00754	0	211.251	274.085	133.545	0	0.01568	0.93177	0.04929	0.00327	0	20.025	2133.69	0.053	659.435	2.91998	140.057	0.53729	0	0.00011	0.00773	0.35215	0.64001	0	-0.05911	0	0	0.76818	0.22991	0.00191	0	-0.03951	0.00072	0.00121	0.76625	0.23024	0.00159	0
1	01:08:01	LD222_Rht17_NIL	T._durum_LD222_Rht17_NIL	KH2PO4	2021-03-26 16:09:29	331105	0.24016	0	0	0.03084	0.96371	0.00545	0	212.655	256.533	136.685	0	0.01201	0.88425	0.09999	0.00374	0	19.901	1557	0.038	515.23	2.9374	147.808	0.59453	0	0	0.00113	0.2055	0.79337	0	-0.07552	0	0.00016	0.7696	0.22988	0.00036	0	-0.05046	0	0.00078	0.76897	0.22972	0.00052	0
1	01:08:02	LD222_Rht17_NIL	T._durum_LD222_Rht17_NIL	KH2PO4	2021-03-26 16:09:29	411702	0.21807	0	0.0003	0.01997	0.97836	0.00136	0	201.686	234.256	136.013	0	0.01874	0.9249	0.05601	0.00036	0	25.335	2041.3	0.05	791.781	2.33681	150.419	0.51231	0	0	0.00894	0.41107	0.57999	0	-0.06145	0	0	0.75167	0.24824	9e-05	0	-0.05086	0.00057	0.00098	0.75012	0.24709	0.00039	0.00085
1	01:08:03	LD222_Rht17_NIL	T._durum_LD222_Rht17_NIL	KH2PO4	2021-03-26 16:09:29	298435	0.2761	0	0	0.02536	0.95271	0.02193	0	201.251	221.822	129.849	0	0.01839	0.91619	0.06479	0.00062	0	21.136	1482.9	0.037	479.324	2.77298	116.26	0.57516	0	0	0.00201	0.26572	0.73227	0	-0.03961	0	0.00052	0.67506	0.32341	0.00102	0	-0.03094	0	0.00639	0.66919	0.32416	0.00027	0
1	01:09:01	LD222_(tall_wheat)	LD222_recurrent_parent_(tall)	KH2PO4	2021-03-26 16:09:29	380078	0.23556	0	0	0.00982	0.98988	0.0003	0	199.907	226.129	134.908	0.00024	0.00956	0.94753	0.04214	0.00054	0	31.339	1901.28	0.047	948.768	1.92258	126.243	0.57826	0	0	0.00026	0.2326	0.76714	0	-0.0772	0	0.00094	0.79044	0.20862	0	0	-0.047	0	0.00024	0.79114	0.20862	0	0
1	01:09:02	LD222_(tall_wheat)	LD222_recurrent_parent_(tall)	KH2PO4	2021-03-26 16:09:29	453908	0.2297	0	0	0.0049	0.99465	0.00045	0	200.645	231.723	135.973	0	0.01115	0.95084	0.03726	0.00075	0	26.905	2262.25	0.056	931.474	2.20976	121.758	0.53992	0	0	0.00174	0.31042	0.68785	0	-0.06958	0	0	0.73583	0.26397	0.0002	0	-0.05425	0	0.00037	0.73546	0.26417	0	0
1	01:09:03	LD222_(tall_wheat)	LD222_recurrent_parent_(tall)	KH2PO4	2021-03-26 16:09:29	292040	0.25067	0	0	0.03225	0.96038	0.00737	0	179.666	188.677	128.163	0.00042	0.01733	0.92208	0.05558	0.0046	0	26.341	1625.46	0.04	692.511	2.25358	104.861	0.51641	0	0	0.02223	0.30907	0.6687	0	-0.01245	0	0.00076	0.57009	0.42661	0.00254	0	-0.022	0.00014	0.00405	0.56666	0.42869	0.00046	0
2	01:01:01	Chulpan_(rye)	S._cereale_Chulpan	w/o_P	2021-03-26 16:19:04	146921	0.12567	0	0	0.00849	0.99151	0	0	172.524	220.945	154.676	0	0.00996	0.87911	0.10807	0.00286	0	16.555	851.599	0.021	219.663	3.5091	125.154	0.44562	0	0	0.00177	0.72276	0.27547	0	-0.10866	0	0	0.90485	0.09515	0	0	-0.09813	0	0	0.90485	0.09515	0	0
2	01:01:02	Chulpan_(rye)	S._cereale_Chulpan	w/o_P	2021-03-26 16:19:04	123243	0.13947	0	0	0.01497	0.98503	0	0	187.316	226.807	150.024	0	0.00556	0.91553	0.07891	0	0	14.281	657.94	0.016	157.21	4.05319	130.331	0.43497	0	0	0.0215	0.60362	0.37488	0	-0.10289	0	0	0.92552	0.07448	0	0	-0.08541	0	0	0.92552	0.07275	0.00172	0
2	01:01:03	Chulpan_(rye)	S._cereale_Chulpan	w/o_P	2021-03-26 16:19:04	54013	0.10129	0	0.00307	0.07928	0.91765	0	0	204.605	227.447	157.489	0	0.01653	0.80143	0.17608	0.00596	0	8.464	263.987	0.007	29.149	6.7923	135.606	0.34726	0	0	0.01038	0.96387	0.02575	0	-0.0947	0	0	0.92155	0.07845	0	0	-0.10245	0	0.00782	0.91373	0.07845	0	0
2	01:02:01	LD222_Rht17_NIL	T._durum_LD222_Rht17_NIL	w/o_P	2021-03-26 16:19:04	242710	0.15619	0	0	0.05935	0.94065	0	0	269.863	299.517	155.186	0	0.00446	0.75214	0.24192	0.00148	0	14.038	899.382	0.022	188.634	4.12188	216.307	0.48798	0	0	0.0013	0.49892	0.49978	0	-0.12832	0	0	0.89128	0.10872	0	0	-0.11204	0	0.00031	0.89097	0.10872	0	0
2	01:02:02	LD222_Rht17_NIL	T._durum_LD222_Rht17_NIL	w/o_P	2021-03-26 16:19:04	250611	0.12931	0	0	0.03328	0.96672	0	0	223.013	262.712	161.795	0	0.00575	0.79109	0.20296	0.0002	0	17.327	1123.75	0.028	314.106	3.35736	142.362	0.42389	0	0	0.00705	0.60074	0.39221	0	-0.13615	0	0	0.94433	0.05567	0	0	-0.12794	0	0	0.94433	0.05567	0	0
2	01:02:03	LD222_Rht17_NIL	T._durum_LD222_Rht17_NIL	w/o_P	2021-03-26 16:19:04	199278	0.13062	0	0	0.05926	0.94074	0	0	248.745	295.469	159.829	0	0.01215	0.78311	0.20225	0.00249	0	15.517	801.134	0.02	184.713	3.73753	152.451	0.43681	0	0	0.018	0.5642	0.4178	0	-0.1385	0	0	0.94521	0.05479	0	0	-0.12951	0	0	0.94521	0.05408	0.00072	0
2	01:03:01	LD222_(tall_wheat)	LD222_recurrent_parent_(tall)	w/o_P	2021-03-26 16:19:04	330998	0.16726	0	0.00018	0.08539	0.91403	0.0004	0	252.008	261.951	153.013	0	0.02255	0.74063	0.23489	0.00192	0	27.757	1313.44	0.032	590.832	2.14706	170.67	0.51405	0	0	0.00423	0.38278	0.61299	0	-0.12838	0	0.00352	0.85894	0.13736	0.00019	0	-0.10868	0	0.01055	0.8519	0.13755	0	0
2	01:03:02	LD222_(tall_wheat)	LD222_recurrent_parent_(tall)	w/o_P	2021-03-26 16:19:04	310833	0.18741	0	0	0.01075	0.98925	0	0	269.036	285.539	142.105	0.00039	0.02079	0.93451	0.04431	0	0	28.158	1155.36	0.029	533.221	2.11897	165.731	0.51451	0	0	0.00935	0.37315	0.6175	0	-0.10476	0	0	0.84995	0.15005	0	0	-0.07031	0	0	0.84995	0.15005	0	0
2	01:03:03	LD222_(tall_wheat)	LD222_recurrent_parent_(tall)	w/o_P	2021-03-26 16:19:04	244709	0.21359	0	0	0.04797	0.95047	0.00156	0	211.765	248.125	137.437	0	0.0187	0.86959	0.10758	0.00412	0	30.848	1155.57	0.029	570.417	1.95014	101.225	0.48812	0	0	0.02994	0.39625	0.57381	0	-0.06252	0.00019	0	0.79183	0.20582	0.00216	0	-0.05119	0.00019	0.00082	0.79101	0.20684	0.00114	0
2	01:04:01	Chulpan_(rye)	S._cereale_Chulpan	Phosphorite	2021-03-26 16:19:04	269446	0.1495	0	0	0.06163	0.93811	0.00026	0	184.249	212.091	153.382	0.00066	0.01092	0.79641	0.18934	0.00266	0	14.304	1462.4	0.036	303.299	4.04688	126.184	0.4622	0	0	0.00045	0.61348	0.38607	0	-0.11334	0	0.00027	0.8887	0.11103	0	0	-0.10648	0	0.00305	0.88592	0.11103	0	0
2	01:04:02	Chulpan_(rye)	S._cereale_Chulpan	Phosphorite	2021-03-26 16:19:04	279749	0.14063	0	0	0.02549	0.97451	0	0	219.782	262.528	150.202	0	0.01542	0.86949	0.11351	0.00158	0	14.085	1272.85	0.031	292.405	4.10858	153.682	0.40459	0	0	0.01395	0.6235	0.36255	0	-0.09607	0	0	0.90806	0.09194	0	0	-0.08844	0	0	0.90806	0.09069	0.00125	0
2	01:04:03	Chulpan_(rye)	S._cereale_Chulpan	Phosphorite	2021-03-26 16:19:04	195450	0.12075	0	0	0.05465	0.94492	0.00043	0	183.305	206.104	156.596	0.00067	0.01924	0.81089	0.15835	0.01084	0	16.928	1066.25	0.026	284.578	3.43407	108.684	0.38347	0	0	0.02508	0.7526	0.22232	0	-0.1026	0	0.00044	0.92022	0.07882	0.00053	0	-0.09972	0.00027	0.00153	0.91885	0.07866	0.00068	0
2	01:05:01	LD222_Rht17_NIL	T._durum_LD222_Rht17_NIL	Phosphorite	2021-03-26 16:19:04	263901	0.14187	0	0	0.05518	0.94482	0	0	241.852	268.961	160.772	0	0.00425	0.78537	0.20806	0.00231	0	15.828	1091.17	0.027	268.501	3.66583	164.944	0.47574	0	0	0.00335	0.46551	0.53114	0	-0.14235	0	0	0.93178	0.06822	0	0	-0.1252	0	0.00254	0.92924	0.06822	0	0
2	01:05:02	LD222_Rht17_NIL	T._durum_LD222_Rht17_NIL	Phosphorite	2021-03-26 16:19:04	162268	0.14153	0	0	0.04319	0.95681	0	0	218.632	234.674	158.896	0	0.00753	0.81131	0.18116	0	0	16.157	742.195	0.018	191.247	3.5932	164.232	0.48061	0	0	0.00522	0.46538	0.5294	0	-0.13607	0	0	0.93012	0.06988	0	0	-0.11058	0.00052	0	0.9296	0.06988	0	0
2	01:05:03	LD222_Rht17_NIL	T._durum_LD222_Rht17_NIL	Phosphorite	2021-03-26 16:19:04	252439	0.21251	0.00059	0.00082	0.03486	0.95835	0.00539	0	206.696	244.84	140.261	0.0003	0.02116	0.90047	0.07475	0.00331	0	20.697	1221.31	0.03	393.374	2.82922	121.868	0.54284	0	0	0.00817	0.35451	0.63732	0	-0.09896	0	0.00029	0.86365	0.13452	0.00154	0	-0.06717	0.00059	0.01108	0.85226	0.13488	0.00118	0
2	01:06:01	LD222_(tall_wheat)	LD222_recurrent_parent_(tall)	Phosphorite	2021-03-26 16:19:04	294175	0.13904	0.00019	0.00018	0.05245	0.94719	0	0	239.242	268.672	162.463	0	0.00683	0.7856	0.20424	0.00333	0	23.714	1229.61	0.03	479.299	2.48634	156.32	0.47738	0	0	0.00578	0.49375	0.50047	0	-0.15973	0	0.00125	0.95329	0.04546	0	0	-0.13058	0.00055	0.0006	0.95339	0.04546	0	0
2	01:06:02	LD222_(tall_wheat)	LD222_recurrent_parent_(tall)	Phosphorite	2021-03-26 16:19:04	362483	0.18611	0	0	0.03919	0.95688	0.00392	0	202.531	206.161	147.835	0.00015	0.0136	0.85007	0.13313	0.00305	0	30.415	1789.77	0.044	890.423	1.97516	132.546	0.491	0	0	0.01819	0.36962	0.61219	0	-0.10506	0	0	0.89455	0.10545	0	0	-0.08322	0.00016	0.00232	0.89207	0.10545	0	0
2	01:06:03	LD222_(tall_wheat)	LD222_recurrent_parent_(tall)	Phosphorite	2021-03-26 16:19:04	182682	0.22173	0	0	0.01802	0.98168	0.0003	0	216.346	234.503	130.307	0	0.0331	0.90319	0.06372	0	0	26.057	844.4	0.021	355.585	2.27636	120.195	0.4641	0	0	0.01675	0.50066	0.48258	0	-0.03898	0	0	0.66993	0.32977	0.0003	0	-0.03069	0	0.00052	0.66941	0.32938	0.00068	0
2	01:07:01	Chulpan_(rye)	S._cereale_Chulpan	KH2PO4	2021-03-26 16:19:04	336819	0.20346	0	0	0.02216	0.97737	0.00046	0	185.991	221.576	140.235	0	0.00964	0.91239	0.07738	0.0006	0	19.151	1810.94	0.045	571.408	3.04796	135.602	0.52833	0	0	0.00029	0.37548	0.62423	0	-0.08013	0	0	0.80885	0.19073	0.00042	0	-0.06154	0	0.00046	0.80839	0.19115	0	0
2	01:07:02	Chulpan_(rye)	S._cereale_Chulpan	KH2PO4	2021-03-26 16:19:04	424815	0.20426	0	0	0.00512	0.99472	0.00017	0	206.454	264.214	133.896	0	0.01228	0.94743	0.0401	0.00019	0	18.96	2057.67	0.051	640.397	3.07748	157.096	0.48998	0	0	0.00456	0.48126	0.51419	0	-0.05593	0	0.00026	0.7758	0.22394	0	0	-0.04383	0.0001	0.00057	0.77539	0.22293	0.00086	0.00015
2	01:07:03	Chulpan_(rye)	S._cereale_Chulpan	KH2PO4	2021-03-26 16:19:04	552319	0.23411	0	0	0.02761	0.9632	0.0092	0	199.721	274.883	132.934	0	0.01333	0.93212	0.05052	0.00402	0	19.071	2765.45	0.068	814.814	3.06022	132.857	0.52782	0	0	0.0152	0.32667	0.65813	0	-0.05633	0	0.00039	0.79134	0.20768	0.0006	0	-0.03785	0	0.0004	0.79132	0.20755	0.00072	0
2	01:08:01	LD222_Rht17_NIL	T._durum_LD222_Rht17_NIL	KH2PO4	2021-03-26 16:19:04	451554	0.19588	0	0	0.05353	0.9439	0.00257	0	208.674	251.277	148.256	0	0.01017	0.7852	0.20369	0.00094	0	18.566	2163.92	0.053	620.19	3.14032	151.373	0.54542	0	0	0.00171	0.33354	0.66475	0	-0.10351	0	0.00114	0.77865	0.22009	0.00011	0	-0.08805	0	0.00306	0.77674	0.22021	0	0
2	01:08:02	LD222_Rht17_NIL	T._durum_LD222_Rht17_NIL	KH2PO4	2021-03-26 16:19:04	423773	0.2205	0	0	0.01732	0.98254	0.00014	0	202.692	233.836	140.451	0	0.01219	0.92488	0.06211	0.00082	0	23.008	2090.73	0.052	792.118	2.5583	143.602	0.51965	0	0	0.00973	0.31193	0.67834	0	-0.08538	0	0	0.85385	0.14615	0	0	-0.06473	0	0.00028	0.85357	0.14615	0	0
2	01:08:03	LD222_Rht17_NIL	T._durum_LD222_Rht17_NIL	KH2PO4	2021-03-26 16:19:04	313065	0.2511	0	0.00036	0.04634	0.94377	0.00953	0	209.596	237.908	134.624	0.00025	0.01651	0.88043	0.10083	0.00198	0	22.816	1493.66	0.037	516.955	2.57864	138.478	0.55304	0	0.00028	0.01224	0.28981	0.69767	0	-0.06293	0	0.0003	0.72127	0.2778	0.00063	0	-0.05264	0	0.00509	0.71647	0.27749	0.0007	0.00024
2	01:09:01	LD222_(tall_wheat)	LD222_recurrent_parent_(tall)	KH2PO4	2021-03-26 16:19:04	386398	0.22489	0	0	0.02638	0.97311	0.00051	0	180.408	226.885	139.749	0	0.00729	0.88828	0.10299	0.00143	0	30.617	2141.8	0.053	1020.6	1.96339	90.154	0.56769	0	0	0.0047	0.23487	0.76044	0	-0.09041	0	0.0076	0.77142	0.22097	0	0	-0.06708	0	0.00939	0.76963	0.22097	0	0
2	01:09:02	LD222_(tall_wheat)	LD222_recurrent_parent_(tall)	KH2PO4	2021-03-26 16:19:04	494449	0.20016	0	0	0.03633	0.96356	0.00011	0	202.038	248.988	142.57	0	0.00521	0.89509	0.09723	0.00247	0	25.398	2447.31	0.06	969.67	2.3314	114.962	0.49879	0	0	0.01081	0.35143	0.63776	0	-0.08698	0	0	0.85083	0.14917	0	0	-0.06863	0	0	0.85083	0.14917	0	0
2	01:09:03	LD222_(tall_wheat)	LD222_recurrent_parent_(tall)	KH2PO4	2021-03-26 16:19:04	273396	0.24048	0	0.00029	0.02249	0.9751	0.00211	0	193.191	203.68	131.421	0.00032	0.02594	0.92439	0.04547	0.00389	0	25.15	1415.17	0.035	564.679	2.35283	123.574	0.54357	0	0.00017	0.01244	0.27245	0.71494	0	-0.05098	0	0.00112	0.70478	0.29395	0.00015	0	-0.03566	0	0.0003	0.70559	0.29317	0.00076	0.00017
1	02:01:01	Chulpan_(rye)	S._cereale_Chulpan	w/o_P	2021-03-26 18:17:17	127555	0.20769	0	0	0.02426	0.97474	0.001	0	184.578	228.069	131.821	0	0.01061	0.91558	0.07203	0.00179	0	15.448	691.061	0.017	166.781	3.75385	145.324	0.53229	0	0	0	0.34979	0.65021	0	-0.0376	0	0	0.69058	0.30942	0	0	-0.03192	0	0	0.69058	0.30845	0.00097	0
1	02:01:02	Chulpan_(rye)	S._cereale_Chulpan	w/o_P	2021-03-26 18:17:17	181282	0.12043	0	0	0.02755	0.97245	0	0	236.631	277.49	158.703	0	0.00453	0.79349	0.2012	0.00078	0	10.334	766.094	0.019	118.996	5.57325	173.354	0.39747	0	0	0.0077	0.76666	0.22564	0	-0.10782	0	0	0.96681	0.03319	0	0	-0.11055	0	0	0.96681	0.03319	0	0
1	02:01:03	Chulpan_(rye)	S._cereale_Chulpan	w/o_P	2021-03-26 18:17:17	91963.2	0.1973	0	0	0.00393	0.99451	0.00156	0	160.751	206.7	134.357	0	0.03623	0.9469	0.01626	0.00061	0	10.939	572.084	0.014	92.695	5.26861	119.269	0.51672	0	0	0.00622	0.45316	0.54062	0	-0.07061	0	0.00098	0.80072	0.19744	0.00086	0	-0.04241	0	0.00078	0.80092	0.1983	0	0
1	02:02:01	LD222_Rht17_NIL	T._durum_LD222_Rht17_NIL	w/o_P	2021-03-26 18:17:17	61960.9	0.12304	0	0	0.0511	0.9489	0	0	219.805	226.145	166.626	0	0.00243	0.73527	0.2623	0	0	18.618	281.89	0.007	86.735	3.13192	142.046	0.4556	0	0	0	0.53439	0.46561	0	-0.16718	0	0	0.95423	0.04577	0	0	-0.15287	0	0.00141	0.95283	0.04577	0	0
1	02:02:02	LD222_Rht17_NIL	T._durum_LD222_Rht17_NIL	w/o_P	2021-03-26 18:17:17	266178	0.1259	0	0	0.02726	0.97274	0	0	255.587	282.006	162.18	0	0.00503	0.79596	0.19884	0.00017	0	16.025	1041.44	0.026	254.028	3.62194	175.519	0.43007	0	0	0.01149	0.63485	0.35365	0	-0.14192	0	0	0.9605	0.0395	0	0	-0.13129	0	0	0.9605	0.0395	0	0
1	02:02:03	LD222_Rht17_NIL	T._durum_LD222_Rht17_NIL	w/o_P	2021-03-26 18:17:17	143467	0.13766	0	0	0.05844	0.94024	0.00132	0	262.898	279.107	155.434	0	0.01496	0.81527	0.16658	0.00319	0	10.288	545.712	0.013	79.91	5.59812	207.194	0.44175	0	0.00088	0.01352	0.60835	0.37724	0	-0.11721	0	0	0.91429	0.08571	0	0	-0.1042	0.00088	0.00276	0.91064	0.08571	0	0
1	02:03:01	LD222_(tall_wheat)	LD222_recurrent_parent_(tall)	w/o_P	2021-03-26 18:17:17	274060	0.13958	0	0	0.04411	0.95589	0	0	331.298	362.855	158.922	0	0.01109	0.78758	0.19851	0.00282	0	20.117	827.232	0.02	268.378	2.90722	242.138	0.47198	0	0	0.00457	0.47873	0.51669	0	-0.13617	0	0.00027	0.91004	0.08969	0	0	-0.1146	0.00027	0	0.91004	0.08969	0	0
1	02:03:02	LD222_(tall_wheat)	LD222_recurrent_parent_(tall)	w/o_P	2021-03-26 18:17:17	351666	0.17232	0.00043	0	0.0242	0.97538	0	0	317.427	380.655	145.829	0	0.01993	0.89751	0.07676	0.0058	0	15.17	1107.86	0.027	278.259	3.82087	242.913	0.47762	0	0	0.01314	0.4564	0.53045	0	-0.10123	0	0	0.87404	0.12596	0	0	-0.08107	0	0.00022	0.87382	0.12541	0.00055	0
1	02:03:03	LD222_(tall_wheat)	LD222_recurrent_parent_(tall)	w/o_P	2021-03-26 18:17:17	287402	0.27544	0	0	0.00572	0.99066	0.00362	0	265.146	299.693	124.067	0.00062	0.03872	0.94874	0.01172	0.0002	0	24.906	1083.94	0.027	442.431	2.37438	182.477	0.59915	0	0	0.00094	0.19532	0.80374	0	-0.02572	0	0	0.64837	0.35133	0.0003	0	-0.00813	0	0	0.64837	0.35163	0	0
1	02:04:01	Chulpan_(rye)	S._cereale_Chulpan	Phosphorite	2021-03-26 18:17:17	235324	0.14433	0	0	0.06921	0.93079	0	0	186.487	203.158	154.59	0	0.00441	0.76084	0.23224	0.00251	0	13.086	1261.88	0.031	255.226	4.41598	130.494	0.4565	0	0	0.00287	0.57129	0.42584	0	-0.09946	0	0	0.87097	0.12903	0	0	-0.09602	0	0.00043	0.87055	0.12903	0	0
1	02:04:02	Chulpan_(rye)	S._cereale_Chulpan	Phosphorite	2021-03-26 18:17:17	459302	0.14742	0	0	0.02222	0.97763	0.00015	0	220.463	249.586	151.776	0	0.00807	0.866	0.12278	0.00315	0	14.032	2083.35	0.051	443.632	4.12378	157.054	0.45253	0	0	0.00577	0.53619	0.45805	0	-0.10476	0	0.0005	0.91923	0.08027	0	0	-0.08999	0	0	0.91973	0.08027	0	0
1	02:04:03	Chulpan_(rye)	S._cereale_Chulpan	Phosphorite	2021-03-26 18:17:17	123062	0.20287	0	0	0.00988	0.98964	0.00048	0	149.532	159.069	130.932	0.00043	0.02132	0.95376	0.02162	0.00287	0	15.429	822.979	0.02	182.064	3.75814	113.471	0.50374	0	0	0.00634	0.45158	0.54208	0	-0.04161	0	0	0.73383	0.26617	0	0	-0.03078	0	0	0.73383	0.26568	0.00049	0
1	02:05:01	LD222_Rht17_NIL	T._durum_LD222_Rht17_NIL	Phosphorite	2021-03-26 18:17:17	233715	0.16214	0	0.00108	0.04042	0.9585	0	0	240.147	264.999	155.425	0	0.00779	0.8212	0.16669	0.00432	0	18.529	973.216	0.024	292.224	3.14644	175.103	0.53165	0	0	0.00725	0.32502	0.66773	0	-0.14044	0	0.00271	0.90622	0.09106	0	0	-0.10756	0.00018	0.00206	0.90671	0.09106	0	0
1	02:05:02	LD222_Rht17_NIL	T._durum_LD222_Rht17_NIL	Phosphorite	2021-03-26 18:17:17	265699	0.16507	0	0	0.06467	0.93533	0	0	246.4	292.232	148.731	0	0.00329	0.87226	0.11774	0.00671	0	16.57	1078.32	0.027	300.868	3.50613	152.548	0.45942	0	0	0.02068	0.49915	0.48017	0	-0.09796	0	0	0.92886	0.07114	0	0	-0.08588	0.00038	0.00036	0.92811	0.07056	0.00058	0
1	02:05:03	LD222_Rht17_NIL	T._durum_LD222_Rht17_NIL	Phosphorite	2021-03-26 18:17:17	199288	0.182	0	0	0.02167	0.97833	0	0	248.044	273.761	144.786	0	0.02561	0.88566	0.08257	0.00616	0	10.441	803.438	0.02	117.856	5.51696	189.653	0.50614	0	0	0.00069	0.46941	0.52991	0	-0.09802	0	0	0.86648	0.13318	0.00035	0	-0.07379	0	0	0.86648	0.13352	0	0
1	02:06:01	LD222_(tall_wheat)	LD222_recurrent_parent_(tall)	Phosphorite	2021-03-26 18:17:17	337226	0.19437	0	0.00048	0.07097	0.92761	0.00093	0	305.991	338.355	145.753	0	0.0178	0.77415	0.20495	0.00311	0	13.895	1102.08	0.027	237.435	4.16352	208.463	0.51725	0	0	0.00056	0.42933	0.57011	0	-0.09652	0	0	0.81822	0.18178	0	0	-0.08614	0	0.00553	0.81269	0.18148	0.0003	0
1	02:06:02	LD222_(tall_wheat)	LD222_recurrent_parent_(tall)	Phosphorite	2021-03-26 18:17:17	409554	0.19666	0	0	0.02102	0.97898	0	0	254.207	301.417	140.266	0	0.01663	0.9223	0.05901	0.00206	0	25.492	1611.1	0.04	661.709	2.32332	159.939	0.51858	0	0	0.0101	0.30557	0.68433	0	-0.0815	0	0	0.87274	0.12726	0	0	-0.06107	0.00016	0.00083	0.87175	0.12726	0	0
1	02:06:03	LD222_(tall_wheat)	LD222_recurrent_parent_(tall)	Phosphorite	2021-03-26 18:17:17	174223	0.21056	0	0	0.01129	0.98293	0.00577	0	243.159	251.903	137.442	0.00179	0.03551	0.90106	0.06116	0.00048	0	26.878	716.499	0.018	302.244	2.21181	135.017	0.5263	0	0	0.01354	0.35533	0.63113	0	-0.07313	0	0.00044	0.79271	0.20415	0.0027	0	-0.04852	0	0	0.79315	0.20489	0.00196	0
1	02:07:01	Chulpan_(rye)	S._cereale_Chulpan	KH2PO4	2021-03-26 18:17:17	337519	0.1991	0.00019	0	0.01962	0.97985	0.00034	0	194.687	215.3	133.49	0	0.00618	0.91315	0.08033	0.00033	0	18.085	1733.65	0.043	484.945	3.22105	151.579	0.52083	0	0	0.00019	0.38112	0.61869	0	-0.04527	0	0	0.71881	0.28119	0	0	-0.04095	0	0.00019	0.71862	0.28119	0	0
1	02:07:02	Chulpan_(rye)	S._cereale_Chulpan	KH2PO4	2021-03-26 18:17:17	465807	0.1801	0	0	0.0244	0.9756	0	0	219.744	240.427	147.501	0	0.00195	0.87265	0.1254	0	0	20.101	2119.77	0.052	680.131	2.90938	138.121	0.52494	0	0	0.00098	0.35176	0.64727	0	-0.1038	0	0.00069	0.88128	0.11803	0	0	-0.08193	0	0.00014	0.88183	0.11803	0	0
1	02:07:03	Chulpan_(rye)	S._cereale_Chulpan	KH2PO4	2021-03-26 18:17:17	558395	0.23753	0	0	0.01647	0.97582	0.00771	0	201.946	222.002	127.057	0.00019	0.03067	0.93508	0.03038	0.00369	0	25.979	2765.08	0.068	1093.28	2.28274	116.047	0.54509	0	0	0.01041	0.32188	0.66772	0	-0.02451	0	0.00024	0.62652	0.37193	0.00131	0	-0.01835	9e-05	0.00045	0.62622	0.37077	0.00219	0.00028
1	02:08:01	LD222_Rht17_NIL	T._durum_LD222_Rht17_NIL	KH2PO4	2021-03-26 18:17:17	484120	0.20342	0	0.00015	0.04374	0.956	0.00011	0	212.797	303.998	146.08	0	0.00469	0.8501	0.14497	0.00024	0	23.782	2275.03	0.056	872.944	2.47962	145.405	0.56822	0	0	0.0004	0.25378	0.74582	0	-0.11472	0	0	0.85874	0.14126	0	0	-0.08816	0	0.00223	0.85651	0.14126	0	0
1	02:08:02	LD222_Rht17_NIL	T._durum_LD222_Rht17_NIL	KH2PO4	2021-03-26 18:17:17	530984	0.2231	0	0	0.00814	0.99163	0.00023	0	217.641	226.661	140.941	0	0.00695	0.93777	0.05454	0.00074	0	23.283	2439.72	0.06	939.606	2.52971	125.101	0.55493	0	0	0.00387	0.2722	0.72392	0	-0.10372	0	0	0.88382	0.11618	0	0	-0.07194	0.00024	0.00037	0.88322	0.11618	0	0
1	02:08:03	LD222_Rht17_NIL	T._durum_LD222_Rht17_NIL	KH2PO4	2021-03-26 18:17:17	284866	0.22928	0	0	0.02428	0.96718	0.00854	0	213.611	225.89	133.613	0	0.03407	0.8885	0.07227	0.00516	0	23.942	1333.57	0.033	489.433	2.46402	120.074	0.52197	0	0	0.01562	0.403	0.58138	0	-0.05091	0	0.00108	0.70929	0.28727	0.00236	0	-0.03924	0	0.0022	0.70817	0.28846	0.00118	0
1	02:09:01	LD222_(tall_wheat)	LD222_recurrent_parent_(tall)	KH2PO4	2021-03-26 18:17:17	487177	0.23015	0	0	0.01148	0.98531	0.00321	0	267.61	288.85	135.532	0	0.01047	0.91906	0.06991	0.00055	0	17.692	1820.48	0.045	457.231	3.29024	208.419	0.5737	0	0	0.00073	0.2617	0.73757	0	-0.06814	0	0	0.75563	0.2442	0.00018	0	-0.04905	0	0.00082	0.75481	0.24437	0	0
1	02:09:02	LD222_(tall_wheat)	LD222_recurrent_parent_(tall)	KH2PO4	2021-03-26 18:17:17	531731	0.21133	0	0	0.01161	0.98822	0.00017	0	277.379	300.088	136.49	0	0.01424	0.93189	0.05299	0.00089	0	19.294	1916.99	0.047	563.033	3.02625	212.325	0.51159	0	0	0.00673	0.3605	0.63277	0	-0.0644	0	0.00013	0.7858	0.2137	0.00037	0	-0.05065	0.00013	0.00081	0.785	0.2135	0.0004	0.00017
1	02:09:03	LD222_(tall_wheat)	LD222_recurrent_parent_(tall)	KH2PO4	2021-03-26 18:17:17	458421	0.25875	0	0	0.01638	0.97758	0.00604	0	214.079	252.076	124.92	0.00012	0.02938	0.92791	0.03894	0.00365	0	23.935	2141.36	0.053	779.551	2.46472	157.647	0.53425	0	0	0.01126	0.30135	0.68739	0	-0.00187	0	0.00012	0.54223	0.45664	0.001	0	-0.00989	0	0.00032	0.54204	0.45631	0.00134	0
2	02:01:01	Chulpan_(rye)	S._cereale_Chulpan	w/o_P	2021-03-26 18:23:28	133130	0.16815	0	0.00636	0.02981	0.96291	0.00092	0	203.023	235.102	139.804	0	0.03061	0.82658	0.13619	0.00663	0	15.649	655.74	0.016	163.318	3.7068	151.124	0.47581	0	0	0.0079	0.48854	0.50356	0	-0.059	0	0	0.7517	0.24575	0.00255	0	-0.05945	0.00031	0.00811	0.74328	0.24796	0.00034	0
2	02:01:02	Chulpan_(rye)	S._cereale_Chulpan	w/o_P	2021-03-26 18:23:28	185843	0.08605	0	0	0.05538	0.94462	0	0	237.14	280.337	167.481	0	0.00352	0.65632	0.33833	0.00183	0	10.159	783.685	0.019	122.705	5.66805	163.935	0.33116	0	0	0.01136	0.89608	0.09256	0	-0.10874	0	0	0.9604	0.0396	0	0	-0.12496	0	0	0.9604	0.0396	0	0
2	02:01:03	Chulpan_(rye)	S._cereale_Chulpan	w/o_P	2021-03-26 18:23:28	49091.9	0.1397	0	0	0.01532	0.98468	0	0	172.998	182.895	149.79	0	0.00784	0.91509	0.07511	0.00196	0	7.913	283.771	0.007	23.648	7.26129	121.937	0.46303	0	0	0	0.61432	0.38568	0	-0.10003	0	0	0.92978	0.07022	0	0	-0.08088	0	0	0.92978	0.07022	0	0
2	02:02:01	LD222_Rht17_NIL	T._durum_LD222_Rht17_NIL	w/o_P	2021-03-26 18:23:28	141367	0.23525	0	0	0.00977	0.98967	0.00056	0	214.883	244.292	138.591	0	0.00872	0.94072	0.05055	0	0	18.559	657.879	0.016	200.593	3.14148	145.458	0.60146	0	0	0	0.15121	0.84879	0	-0.09674	0	0	0.86573	0.13427	0	0	-0.0616	0	0	0.86573	0.13427	0	0
2	02:02:02	LD222_Rht17_NIL	T._durum_LD222_Rht17_NIL	w/o_P	2021-03-26 18:23:28	236376	0.16979	0	0	0.02998	0.97002	0	0	236.511	288.918	148.879	0	0.01164	0.86154	0.12682	0	0	16.654	999.429	0.025	282.689	3.48885	172.672	0.50182	0	0	0.00247	0.43346	0.56407	0	-0.11148	0	0	0.93243	0.06757	0	0	-0.08688	0	0.00314	0.92928	0.06757	0	0
2	02:02:03	LD222_Rht17_NIL	T._durum_LD222_Rht17_NIL	w/o_P	2021-03-26 18:23:28	237217	0.17494	0	0	0.02248	0.97627	0.00125	0	259.671	304.193	147.103	0	0.01764	0.87498	0.10492	0.00246	0	12.365	913.527	0.023	171.774	4.66896	183.532	0.47002	0.00082	0.00053	0.01462	0.50252	0.4815	0	-0.10223	0	0	0.87535	0.12394	0.00072	0	-0.08646	0.00054	0	0.87499	0.12178	0.00215	0.00053
2	02:03:01	LD222_(tall_wheat)	LD222_recurrent_parent_(tall)	w/o_P	2021-03-26 18:23:28	256296	0.21578	0	0	0.04752	0.95221	0.00027	0	297.561	321.172	134.627	0.00071	0.01378	0.87435	0.10819	0.00297	0	17.008	861.324	0.021	234.604	3.41842	196.344	0.54365	0	0	0.004	0.30142	0.69458	0	-0.04776	0	0	0.71328	0.28529	0.00142	0	-0.03914	0	0.00036	0.71292	0.28672	0	0
2	02:03:02	LD222_(tall_wheat)	LD222_recurrent_parent_(tall)	w/o_P	2021-03-26 18:23:28	351758	0.15662	0	0	0.04223	0.95777	0	0	309.863	355.202	146.471	0	0.00939	0.86456	0.12314	0.00292	0	16.466	1135.2	0.028	313.084	3.52758	231.72	0.44711	0	0.00016	0.01902	0.54803	0.43279	0	-0.08468	0	0	0.86678	0.13322	0	0	-0.08126	0.00033	0.00068	0.86577	0.13322	0	0
2	02:03:03	LD222_(tall_wheat)	LD222_recurrent_parent_(tall)	w/o_P	2021-03-26 18:23:28	154554	0.22692	0	0	0.02676	0.96746	0.00577	0	278.883	301.034	132.087	0	0.04933	0.88489	0.05922	0.00657	0	28.135	554.187	0.014	248.613	2.12055	200.572	0.55342	0	0	0.00962	0.29161	0.69877	0	-0.04118	0	0.0006	0.73727	0.25629	0.00584	0	-0.03127	0	0.00058	0.7373	0.26212	0	0
2	02:04:01	Chulpan_(rye)	S._cereale_Chulpan	Phosphorite	2021-03-26 18:23:28	314292	0.19658	0	0	0.02152	0.97833	0.00014	0	179.001	235.425	134.986	0	0.01234	0.91535	0.07112	0.0012	0	10.489	1755.81	0.043	232.08	5.49171	143.484	0.50761	0	0	0.00025	0.41243	0.58733	0	-0.04989	0	0	0.72715	0.27285	0	0	-0.04046	0	0	0.72715	0.27285	0	0
2	02:04:02	Chulpan_(rye)	S._cereale_Chulpan	Phosphorite	2021-03-26 18:23:28	325075	0.16276	0	0	0.02486	0.97414	0.001	0	198.33	234.091	142.99	0	0.0235	0.89246	0.08343	0.0006	0	13.266	1639.06	0.04	349.633	4.35705	148.005	0.45797	0	0	0.00433	0.59968	0.396	0	-0.07403	0	0.00025	0.81769	0.18206	0	0	-0.06403	0	0.00011	0.81782	0.18206	0	0
2	02:04:03	Chulpan_(rye)	S._cereale_Chulpan	Phosphorite	2021-03-26 18:23:28	125690	0.16953	0	0.00055	0.03671	0.96274	0	0	166.734	197.108	138.879	0	0.01379	0.8947	0.08723	0.00428	0	16.642	753.836	0.019	196.854	3.49128	116.783	0.46099	0	0.00081	0.011	0.57631	0.41188	0	-0.05434	0	0	0.79587	0.20413	0	0	-0.04459	0	0	0.79587	0.20218	0.00056	0.0014
2	02:05:01	LD222_Rht17_NIL	T._durum_LD222_Rht17_NIL	Phosphorite	2021-03-26 18:23:28	211625	0.15392	0	0	0.04745	0.95225	0.0003	0	230.917	248.817	157.604	0	0.00794	0.78537	0.20647	0.00022	0	18.437	916.454	0.023	269.406	3.16157	175.939	0.50543	0	0	0	0.43124	0.56876	0	-0.13831	0	0.00121	0.93233	0.06646	0	0	-0.11444	0	0.00105	0.93249	0.06646	0	0
2	02:05:02	LD222_Rht17_NIL	T._durum_LD222_Rht17_NIL	Phosphorite	2021-03-26 18:23:28	369404	0.14269	0	0	0.03647	0.96353	0	0	272.103	298.6	157.923	0	0.01001	0.8195	0.17011	0.00038	0	14.912	1357.59	0.033	326.249	3.88544	172.975	0.43389	0	0	0.01494	0.53488	0.45017	0	-0.12302	0	0	0.90484	0.09516	0	0	-0.11273	0	0	0.90484	0.09516	0	0
2	02:05:03	LD222_Rht17_NIL	T._durum_LD222_Rht17_NIL	Phosphorite	2021-03-26 18:23:28	185597	0.19072	0	0	0.027	0.97252	0.00048	0	250.877	290.745	145.897	0	0.01437	0.90042	0.08521	0	0	9.667	739.793	0.018	98.465	5.95359	157.984	0.52309	0	0	0.00327	0.36678	0.62995	0	-0.1117	0	0.00058	0.89641	0.1021	0.00091	0	-0.07632	0	0	0.89699	0.1021	0.00091	0
2	02:06:01	LD222_(tall_wheat)	LD222_recurrent_parent_(tall)	Phosphorite	2021-03-26 18:23:28	350606	0.11918	0	0	0.06242	0.93758	0	0	309.212	354.361	164.224	0	0.00968	0.72195	0.2662	0.00216	0	13.718	1133.87	0.028	237.251	4.21629	227.697	0.40563	0	0	0.00816	0.66069	0.33115	0	-0.13363	0	0	0.92114	0.07886	0	0	-0.13445	0	0.00181	0.91934	0.07886	0	0
2	02:06:02	LD222_(tall_wheat)	LD222_recurrent_parent_(tall)	Phosphorite	2021-03-26 18:23:28	406769	0.20129	0	0.00023	0.01512	0.9844	0.00026	0	282.534	313.235	139.971	0	0.01063	0.90733	0.08076	0.00127	0	25.508	1439.72	0.036	599.292	2.322	175.554	0.52267	0	0	0.00396	0.42335	0.57269	0	-0.08044	0	0.00023	0.83889	0.16062	0.00026	0	-0.06533	0	0.00118	0.83795	0.16087	0	0
2	02:06:03	LD222_(tall_wheat)	LD222_recurrent_parent_(tall)	Phosphorite	2021-03-26 18:23:28	310776	0.20565	0	0	0.03047	0.96507	0.00446	0	241.99	262.333	138.138	0	0.0227	0.88565	0.08857	0.00308	0	26.406	1284.25	0.032	481.286	2.24839	134.717	0.49332	0	0	0.02395	0.40535	0.5707	0	-0.07052	0.0002	0	0.78416	0.21475	0.0009	0	-0.05366	0	0	0.78436	0.2138	0.00185	0
2	02:07:01	Chulpan_(rye)	S._cereale_Chulpan	KH2PO4	2021-03-26 18:23:28	275754	0.17755	0	0	0.036	0.964	0	0	158.866	226.732	140.22	0	0.01057	0.86459	0.12395	0.00089	0	15.74	1735.77	0.043	413.554	3.68576	128.027	0.50108	0	0	0.00199	0.42239	0.57562	0	-0.06342	0	0.00013	0.72077	0.27859	0.00051	0	-0.0555	0	0.00098	0.71992	0.27803	0.00086	0.00021
2	02:07:02	Chulpan_(rye)	S._cereale_Chulpan	KH2PO4	2021-03-26 18:23:28	429208	0.19355	0	0	0.01897	0.98082	0.00022	0	203.293	237.623	142.258	0.0001	0.01148	0.88488	0.10275	0.00079	0	20.92	2111.28	0.052	704.71	2.80033	137.715	0.52561	0	0	0.00403	0.35391	0.64205	0	-0.07461	0	0.00022	0.76007	0.23971	0	0	-0.06374	9e-05	0.00103	0.75916	0.23971	0	0
2	02:07:03	Chulpan_(rye)	S._cereale_Chulpan	KH2PO4	2021-03-26 18:23:28	652009	0.24304	0	0	0.01444	0.98225	0.0033	0	198.185	221.494	127.51	0	0.01288	0.95405	0.0315	0.00157	0	24.198	3289.91	0.081	1226.54	2.43949	137.848	0.53873	0	0	0.01052	0.31651	0.67297	0	-0.02514	0	0	0.64984	0.34867	0.00149	0	-0.01811	0	8e-05	0.64976	0.3483	0.00121	0.00065
2	02:08:01	LD222_Rht17_NIL	T._durum_LD222_Rht17_NIL	KH2PO4	2021-03-26 18:23:28	560278	0.1931	0	0.00014	0.04226	0.95689	0.00072	0	215.999	261.915	148.117	0	0.01251	0.86221	0.12313	0.00215	0	23.269	2593.89	0.064	920.663	2.53117	153.775	0.54241	0	0	0.00157	0.26747	0.73096	0	-0.12043	0	0.00379	0.83821	0.15789	0.00012	0	-0.09509	0	0.01231	0.82968	0.15801	0	0
2	02:08:02	LD222_Rht17_NIL	T._durum_LD222_Rht17_NIL	KH2PO4	2021-03-26 18:23:28	591710	0.20885	0	0	0.02282	0.97718	0	0	216.87	225.64	140.646	9e-05	0.0043	0.93588	0.05801	0.00172	0	23.495	2728.41	0.067	917.478	2.50813	130.05	0.50305	0	0	0.00978	0.3563	0.63392	0	-0.08634	0	0	0.87375	0.12625	0	0	-0.06805	0.00014	0.00088	0.87273	0.12625	0	0
2	02:08:03	LD222_Rht17_NIL	T._durum_LD222_Rht17_NIL	KH2PO4	2021-03-26 18:23:28	452593	0.25625	0	0.00024	0.02239	0.9556	0.02177	0	209.807	229.707	133.897	0.00019	0.01199	0.93082	0.05334	0.00366	0	22.432	2157.19	0.053	756.35	2.62039	147.911	0.56755	0	0.00031	0.01258	0.22758	0.75954	0	-0.06056	0	0.00011	0.74412	0.25566	0.0001	0	-0.04372	0	0.00041	0.74383	0.25576	0	0
2	02:09:01	LD222_(tall_wheat)	LD222_recurrent_parent_(tall)	KH2PO4	2021-03-26 18:23:28	454464	0.24075	0	0.00043	0.0209	0.97385	0.00483	0	264.778	304.043	134.575	0	0.0095	0.92832	0.06104	0.00114	0	22.111	1716.4	0.042	546.012	2.6565	179.155	0.58145	0	0	0.00444	0.223	0.77256	0	-0.06714	0	0.00321	0.70972	0.28694	0.00013	0	-0.04965	0	0.00334	0.70959	0.28681	0.00026	0
2	02:09:02	LD222_(tall_wheat)	LD222_recurrent_parent_(tall)	KH2PO4	2021-03-26 18:23:28	522020	0.20127	0	0	0.0279	0.97195	0.00015	0	268.208	299.248	134.315	0.00039	0.02732	0.88252	0.08815	0.00163	0	22.257	1946.33	0.048	664.656	2.63993	197.785	0.48217	0	0	0.01124	0.45514	0.53363	0	-0.03511	0	0	0.6623	0.3377	0	0	-0.04297	0	0.00152	0.66079	0.3377	0	0
2	02:09:03	LD222_(tall_wheat)	LD222_recurrent_parent_(tall)	KH2PO4	2021-03-26 18:23:28	382483	0.26214	0	0	0.01179	0.98495	0.00326	0	216.119	241.558	124.701	0	0.02945	0.94764	0.02198	0.00093	0	23.738	1769.78	0.044	662.823	2.48394	156.545	0.56645	0	0.00014	0.00497	0.21844	0.77644	0	-0.00587	0	0.00047	0.56111	0.43666	0.00176	0	-0.00399	0	0.00047	0.56111	0.4363	0.00164	0.00048
1	01:01:01	Chulpan_(rye)	S._cereale_Chulpan	w/o_P	2021-03-29 16:53:58	254934	0.09289	0	0	0.06028	0.93972	0	0	183.066	218.315	166.2	0	0.02124	0.7013	0.27613	0.00133	0	21.472	1392.58	0.034	446.635	2.73168	124.006	0.40679	0	0	0.00271	0.8029	0.19439	0	-0.12689	0	0	0.91592	0.08408	0	0	-0.12305	0	0	0.91592	0.0839	0.00018	0
1	01:01:02	Chulpan_(rye)	S._cereale_Chulpan	w/o_P	2021-03-29 16:53:58	243718	0.09024	0	0	0.0418	0.9582	0	0	195.965	230.376	165.477	0	0.02038	0.74088	0.23573	0.00301	0	11.206	1243.68	0.031	206.182	5.14445	134.694	0.34416	0	0	0.01542	0.88563	0.09895	0	-0.1107	0	0	0.92854	0.07146	0	0	-0.11833	0.00036	0	0.92819	0.07123	0.00023	0
1	01:01:03	Chulpan_(rye)	S._cereale_Chulpan	w/o_P	2021-03-29 16:53:58	96286.6	0.15159	0	0	0.01988	0.98012	0	0	221.898	239.964	146.415	0	0.04931	0.83675	0.10901	0.00492	0	10.917	433.923	0.011	64.219	5.27893	142.831	0.46094	0	0	0.00494	0.57579	0.41927	0	-0.08656	0	0	0.84364	0.15636	0	0	-0.06903	0	0	0.84364	0.15636	0	0
1	01:02:01	LD222_Rht17_NIL	T._durum_LD222_Rht17_NIL	w/o_P	2021-03-29 16:53:58	305788	0.1648	0	0.00046	0.07285	0.92649	0.0002	0	277.774	303.708	154.287	0.00085	0.00908	0.75718	0.23095	0.00194	0	18.495	1100.85	0.027	327.741	3.15207	208.532	0.51162	0	0	0.00183	0.46231	0.53587	0	-0.12394	0	0	0.90019	0.09981	0	0	-0.10251	0	0.00486	0.89533	0.09946	0.00035	0
1	01:02:02	LD222_Rht17_NIL	T._durum_LD222_Rht17_NIL	w/o_P	2021-03-29 16:53:58	186807	0.1455	0	0	0.03404	0.96596	0	0	211.094	238.573	152.606	0	0.00893	0.8475	0.14336	0.00021	0	18.603	884.948	0.022	253.716	3.13435	130.065	0.44255	0	0	0.01955	0.53719	0.44325	0	-0.10382	0	0	0.93075	0.06925	0	0	-0.09485	0	0.00115	0.92959	0.06925	0	0
1	01:02:03	LD222_Rht17_NIL	T._durum_LD222_Rht17_NIL	w/o_P	2021-03-29 16:53:58	158616	0.16903	0	0	0.02795	0.97147	0.00059	0	249.589	294.139	145.23	0.00146	0.01956	0.89657	0.08093	0.00148	0	15.16	635.511	0.016	148.596	3.82326	135.955	0.44853	0	0	0.03375	0.49099	0.47526	0	-0.09505	0	0	0.88072	0.11869	0.00059	0	-0.07875	0	0.00078	0.87994	0.11837	0.00059	0.00032
1	01:03:01	LD222_(tall_wheat)	LD222_recurrent_parent_(tall)	w/o_P	2021-03-29 16:53:58	249485	0.20658	0	0	0.0318	0.96781	0.00039	0	266.498	279.333	130.93	0.00032	0.0503	0.87509	0.07226	0.00202	0	33.372	936.16	0.023	488.855	1.81787	220.046	0.51404	0	0	0.00352	0.43068	0.5658	0	-0.03659	0	0.00197	0.66356	0.33446	0	0	-0.0326	0	0.00655	0.65899	0.33446	0	0
1	01:03:02	LD222_(tall_wheat)	LD222_recurrent_parent_(tall)	w/o_P	2021-03-29 16:53:58	386044	0.19245	0	0.00014	0.02028	0.97958	0	0	272.844	285.888	137.817	0	0.01205	0.93207	0.05286	0.00302	0	25.142	1414.89	0.035	494.567	2.35349	182.619	0.49281	0	0	0.00949	0.40595	0.58455	0	-0.06304	0	0	0.79279	0.20721	0	0	-0.05359	0	0	0.79279	0.20721	0	0
1	01:03:03	LD222_(tall_wheat)	LD222_recurrent_parent_(tall)	w/o_P	2021-03-29 16:53:58	178560	0.19753	0	0	0.0429	0.95409	0.00301	0	187.286	259.907	135.342	0	0.01824	0.89151	0.08667	0.00358	0	33.956	953.411	0.024	511.973	1.79025	84.024	0.50417	0	0	0.0333	0.33958	0.62713	0	-0.05	0	0	0.73562	0.26411	0.00027	0	-0.04176	0	0	0.73562	0.26438	0	0
1	01:04:01	Chulpan_(rye)	S._cereale_Chulpan	Phosphorite	2021-03-29 16:53:58	433320	0.12824	0	0.00051	0.04346	0.95603	0	0	210.414	253.389	162.018	0	0.00096	0.71423	0.28364	0.00117	0	14.711	2059.37	0.051	452.003	3.93741	152.796	0.44483	0	0	0.00244	0.66633	0.33123	0	-0.13074	0	0.00028	0.94867	0.05105	0	0	-0.12946	0.00056	0.00114	0.94724	0.05105	0	0
1	01:04:02	Chulpan_(rye)	S._cereale_Chulpan	Phosphorite	2021-03-29 16:53:58	352430	0.13478	0	0	0.03256	0.96744	0	0	214.127	260.279	152.245	0	0.00962	0.8581	0.1311	0.00119	0	12.149	1645.89	0.041	314.289	4.75087	146.679	0.4722	0	0	0.00723	0.5263	0.46646	0	-0.1053	0	0	0.93203	0.06797	0	0	-0.08229	0	0	0.93203	0.06797	0	0
1	01:04:03	Chulpan_(rye)	S._cereale_Chulpan	Phosphorite	2021-03-29 16:53:58	246336	0.15601	0	0	0.03129	0.9674	0.00131	0	198.423	238.507	147.168	0	0.01317	0.89512	0.09015	0.00156	0	20.531	1241.47	0.031	419.672	2.85101	130.923	0.4926	0	0	0.0013	0.53571	0.46298	0	-0.09502	0	0	0.91683	0.08232	0.00085	0	-0.0708	0	0	0.91683	0.08252	0.00065	0
1	01:05:01	LD222_Rht17_NIL	T._durum_LD222_Rht17_NIL	Phosphorite	2021-03-29 16:53:58	296401	0.15792	0	0	0.08587	0.91413	0	0	219.316	241.861	159.532	0	0.00907	0.69885	0.29124	0.00084	0	22.751	1351.48	0.033	495.905	2.58561	120.756	0.51388	0	0	0.00291	0.42236	0.57473	0	-0.14779	0	0.00267	0.88835	0.10859	0.00039	0	-0.13398	0	0.0205	0.87051	0.10883	0.00016	0
1	01:05:02	LD222_Rht17_NIL	T._durum_LD222_Rht17_NIL	Phosphorite	2021-03-29 16:53:58	391204	0.1675	0	0	0.0379	0.96199	0.00011	0	219.795	259.219	153.505	0	0.00575	0.83853	0.15196	0.00376	0	24.284	1779.85	0.044	652.013	2.43136	133.767	0.48036	0	0.00027	0.01111	0.4623	0.52631	0	-0.11779	0.00027	0.00037	0.89936	0.1	0	0	-0.10127	0.00026	0.00027	0.89946	0.09951	0.00021	0.00027
1	01:05:03	LD222_Rht17_NIL	T._durum_LD222_Rht17_NIL	Phosphorite	2021-03-29 16:53:58	280484	0.16391	0	0	0.05689	0.94216	0.00095	0	220.572	250.123	149.235	0	0.01124	0.84515	0.13877	0.00484	0	17.012	1271.62	0.031	330.055	3.41756	144.977	0.50302	0	0	0.01774	0.37256	0.6097	0	-0.10678	0	0	0.88715	0.11285	0	0	-0.08426	0	0	0.88715	0.11172	0.00075	0.00038
1	01:06:01	LD222_(tall_wheat)	LD222_recurrent_parent_(tall)	Phosphorite	2021-03-29 16:53:58	466634	0.14387	0	0	0.07975	0.92025	0	0	232.384	270.066	160.071	0	0.01017	0.71491	0.273	0.00192	0	19.707	2008.04	0.05	626.268	2.96514	135.501	0.48874	0	0	0.0028	0.53216	0.46504	0	-0.13962	0	0.001	0.90444	0.09456	0	0	-0.12685	0	0.00949	0.89595	0.09456	0	0
1	01:06:02	LD222_(tall_wheat)	LD222_recurrent_parent_(tall)	Phosphorite	2021-03-29 16:53:58	592041	0.18385	0	0.00053	0.01896	0.9805	0	0	261.452	306.825	145.282	0	0.0138	0.89856	0.0851	0.00253	0	26.782	2264.43	0.056	948.149	2.21915	180.777	0.50579	0	0	0.00654	0.4205	0.57296	0	-0.09727	0	0.00105	0.87465	0.1242	0.0001	0	-0.07811	0	0.00109	0.87461	0.1242	0.0001	0
1	01:06:03	LD222_(tall_wheat)	LD222_recurrent_parent_(tall)	Phosphorite	2021-03-29 16:53:58	207147	0.18172	0	0	0.04891	0.95078	0.00031	0	232.283	246.155	144.832	0	0.01923	0.85921	0.11762	0.00393	0	22.465	891.785	0.022	322.777	2.61674	117.504	0.476	0	0	0.01492	0.44621	0.53887	0	-0.09173	0	0	0.84442	0.15558	0	0	-0.08093	0	0.0004	0.84402	0.15536	0.00023	0
1	01:07:01	Chulpan_(rye)	S._cereale_Chulpan	KH2PO4	2021-03-29 16:53:58	635059	0.16961	0.0002	0.00026	0.0366	0.96206	0.00089	0	205.768	216.579	148.08	0	0.00502	0.85734	0.13669	0.00094	0	26.79	3086.29	0.076	1284.58	2.21853	153.595	0.51786	0	0	0.00331	0.39632	0.60036	0	-0.10313	0	0.00079	0.85769	0.14152	0	0	-0.07955	0.00027	0.00206	0.85615	0.14152	0	0
1	01:07:02	Chulpan_(rye)	S._cereale_Chulpan	KH2PO4	2021-03-29 16:53:58	890316	0.19175	0	0	0.01626	0.98364	0.0001	0	219.158	252.421	140.798	0	0.00903	0.92375	0.06627	0.00094	0	21.19	4062.44	0.1	1300.5	2.76628	137.253	0.47692	0	0	0.00868	0.44758	0.54374	0	-0.0768	0	0	0.85763	0.14237	0	0	-0.06611	0	0.00055	0.85708	0.14229	8e-05	0
1	01:07:03	Chulpan_(rye)	S._cereale_Chulpan	KH2PO4	2021-03-29 16:53:58	853270	0.22569	0	0	0.02836	0.9593	0.01234	0	227.235	282.398	134.793	0.00021	0.01815	0.92075	0.06019	0.0007	0	20.846	3755.01	0.093	1184.56	2.80982	155.26	0.54617	0	7e-05	0.00476	0.33485	0.66032	0	-0.06579	0	0.00142	0.77442	0.22364	0.00052	0	-0.04506	0	0.00492	0.77092	0.22359	0.00051	7e-05
1	01:08:01	LD222_Rht17_NIL	T._durum_LD222_Rht17_NIL	KH2PO4	2021-03-29 16:53:58	703665	0.22764	0	0.00013	0.03553	0.9622	0.00213	0	225.727	233.557	141.264	0	0.00966	0.85258	0.13702	0.00075	0	22.928	3117.33	0.077	1149.2	2.56674	153.702	0.58109	0	0	0.00353	0.24883	0.74764	0	-0.09321	0	0.00046	0.79251	0.20703	0	0	-0.07037	0	0.00366	0.78931	0.20703	0	0
1	01:08:02	LD222_Rht17_NIL	T._durum_LD222_Rht17_NIL	KH2PO4	2021-03-29 16:53:58	665914	0.19967	0	0	0.01385	0.98615	0	0	232.392	259.418	143.727	0	0.00827	0.93673	0.05433	0.00067	0	24.325	2865.47	0.071	1127.42	2.42752	171.287	0.53562	0	0	0.00321	0.29495	0.70185	0	-0.10712	0	0	0.89229	0.10771	0	0	-0.07639	0	0.00025	0.89204	0.10771	0	0
1	01:08:03	LD222_Rht17_NIL	T._durum_LD222_Rht17_NIL	KH2PO4	2021-03-29 16:53:58	577280	0.27058	0	0	0.01854	0.94049	0.04097	0	221.684	241.761	133.725	0	0.01054	0.9223	0.06487	0.0023	0	24.308	2604.07	0.064	995.192	2.42915	128.438	0.58986	0	0	0.00583	0.21238	0.78179	0	-0.05839	0	0.00289	0.7212	0.2731	0.00281	0	-0.04642	0	0.00046	0.72363	0.27591	0	0
1	01:09:01	LD222_(tall_wheat)	LD222_recurrent_parent_(tall)	KH2PO4	2021-03-29 16:53:58	655890	0.24365	0	0	0.00393	0.99422	0.00185	0	250.064	342.082	133.713	0.00014	0.01134	0.95742	0.0306	0.00051	0	29.118	2622.89	0.065	1159.75	2.0549	165.752	0.58935	0	0	0.00056	0.19177	0.80768	0	-0.07591	0	0.00015	0.77254	0.22705	0.00026	0	-0.04311	0	0.00015	0.77254	0.22704	0.00027	0
1	01:09:02	LD222_(tall_wheat)	LD222_recurrent_parent_(tall)	KH2PO4	2021-03-29 16:53:58	882619	0.22438	0	0	0.00994	0.98996	0.0001	0	266.154	342.763	138.998	0.00017	0.00617	0.94074	0.05265	0.00027	0	23.812	3316.19	0.082	1260.61	2.4767	173.18	0.54874	0	0	0.00462	0.28664	0.70875	0	-0.08839	0	0	0.84588	0.15412	0	0	-0.06173	0	0	0.84588	0.15388	0.00024	0
1	01:09:03	LD222_(tall_wheat)	LD222_recurrent_parent_(tall)	KH2PO4	2021-03-29 16:53:58	598055	0.25754	0.00022	0.00037	0.01914	0.97476	0.00551	0	219.597	253.294	129.143	0.00059	0.01673	0.94228	0.03699	0.00341	0	26.988	2723.42	0.067	1149.68	2.20343	129.899	0.56344	0.00022	0	0.01083	0.24421	0.74473	0	-0.0381	0	0.00094	0.66543	0.33356	8e-05	0	-0.02869	0	0.00118	0.66518	0.33364	0	0
2	01:01:01	Chulpan_(rye)	S._cereale_Chulpan	w/o_P	2021-03-29 17:03:47	123191	0.10517	0	0	0.05756	0.94244	0	0	161.16	217.943	162.426	0	0.02907	0.74915	0.22146	0.00032	0	24.052	764.403	0.019	303.406	2.45341	107.035	0.42342	0	0.00038	0.00379	0.73652	0.25932	0	-0.12302	0	0	0.89738	0.10262	0	0	-0.11304	0	0	0.89738	0.10195	0.00029	0.00038
2	01:01:02	Chulpan_(rye)	S._cereale_Chulpan	w/o_P	2021-03-29 17:03:47	126119	0.12455	0	0	0.0228	0.9772	0	0	188.426	230.531	153.468	0	0.01158	0.88499	0.10305	0.00038	0	13.735	669.328	0.017	158.687	4.21102	144	0.42564	0	0	0.00821	0.59386	0.39793	0	-0.10436	0	0	0.9247	0.0753	0	0	-0.09044	0	0	0.9247	0.0753	0	0
2	01:01:03	Chulpan_(rye)	S._cereale_Chulpan	w/o_P	2021-03-29 17:03:47	107010	0.15948	0	0	0.01858	0.98142	0	0	212.282	247.67	142.87	0	0.03571	0.89791	0.0617	0.00468	0	9.873	504.096	0.012	60.609	5.83091	157.715	0.4822	0	0	0.00957	0.43791	0.55251	0	-0.08246	0	0	0.82604	0.17344	0.00052	0	-0.05941	0	0	0.82604	0.17256	0.0014	0
2	01:02:01	LD222_Rht17_NIL	T._durum_LD222_Rht17_NIL	w/o_P	2021-03-29 17:03:47	341725	0.14376	0.00029	0.00045	0.05456	0.9447	0	0	261.377	299.713	157.632	0.00037	0.01018	0.7691	0.21742	0.00292	0	16.786	1307.4	0.032	355.161	3.46211	183.792	0.46865	0	0	0.00624	0.56342	0.43034	0	-0.13006	0	0.00116	0.90649	0.09235	0	0	-0.11841	0.00122	0.00076	0.90566	0.09167	0.00069	0
2	01:02:02	LD222_Rht17_NIL	T._durum_LD222_Rht17_NIL	w/o_P	2021-03-29 17:03:47	237629	0.17035	0	0.00041	0.03483	0.96476	0	0	219.535	243.964	148.47	0	0.01025	0.84437	0.14301	0.00237	0	22.136	1082.42	0.027	384.106	2.65367	136.306	0.48569	0	0.00145	0.02491	0.40222	0.57142	0	-0.10653	0	0	0.86606	0.13395	0	0	-0.09504	0.00103	0.00403	0.86099	0.13395	0	0
2	01:02:03	LD222_Rht17_NIL	T._durum_LD222_Rht17_NIL	w/o_P	2021-03-29 17:03:47	253931	0.16725	0	0	0.02682	0.97157	0.00161	0	254.986	308.262	149.317	0	0.01881	0.83717	0.14187	0.00216	0	14.284	995.861	0.025	220.147	4.05231	163.854	0.44985	0	0	0.02236	0.54767	0.42997	0	-0.10179	0	0	0.84516	0.15484	0	0	-0.09388	0	0.00341	0.84175	0.15318	0.0011	0.00056
2	01:03:01	LD222_(tall_wheat)	LD222_recurrent_parent_(tall)	w/o_P	2021-03-29 17:03:47	293188	0.18945	0.00042	0.00155	0.01443	0.98339	0.00021	0	253.508	270.168	140.087	0.00023	0.02506	0.89525	0.0769	0.00256	0	25.548	1156.52	0.029	455.165	2.31859	165.467	0.51602	0	0.00021	0.00386	0.39186	0.60407	0	-0.08206	0.00045	0.00072	0.8074	0.19143	0	0	-0.0664	0.00042	0.0009	0.80717	0.19151	0	0
2	01:03:02	LD222_(tall_wheat)	LD222_recurrent_parent_(tall)	w/o_P	2021-03-29 17:03:47	467882	0.15016	0	0	0.03938	0.96062	0	0	264.748	282.728	152.173	0.00013	0.01097	0.85271	0.13347	0.00272	0	23.473	1767.27	0.044	633.479	2.51033	174.968	0.44584	0	0	0.02986	0.462	0.50814	0	-0.10863	0	0	0.90317	0.09683	0	0	-0.09664	0	0.00096	0.9022	0.09618	0.00065	0
2	01:03:03	LD222_(tall_wheat)	LD222_recurrent_parent_(tall)	w/o_P	2021-03-29 17:03:47	255956	0.20618	0	0	0.05873	0.93784	0.00344	0	213.111	261.283	135.92	0	0.02864	0.88016	0.08847	0.00273	0	33.511	1201.04	0.03	627.457	1.81119	96.67	0.54812	0	0	0.00517	0.30904	0.68579	0	-0.07078	0	0.00019	0.77282	0.22442	0.00257	0	-0.04973	0	0.00738	0.76563	0.22576	0.00123	0
2	01:04:01	Chulpan_(rye)	S._cereale_Chulpan	Phosphorite	2021-03-29 17:03:47	370718	0.11278	0.00013	0.00064	0.05087	0.94836	0	0	198.133	224.559	161.621	0	0.00964	0.72952	0.26022	0.00062	0	14.819	1871.06	0.046	416.099	3.90923	148.572	0.43386	0	0	0.00036	0.7108	0.28884	0	-0.12802	0.00035	0.00121	0.92009	0.07835	0	0	-0.12173	0.00066	0.00238	0.91861	0.07835	0	0
2	01:04:02	Chulpan_(rye)	S._cereale_Chulpan	Phosphorite	2021-03-29 17:03:47	405276	0.16491	0	0	0.02198	0.97802	0	0	223.357	260.111	144.661	0.00056	0.01425	0.89815	0.08623	0.00081	0	15.244	1814.48	0.045	445.379	3.80267	167.447	0.4679	0	0	0.0058	0.46291	0.53129	0	-0.0829	0	0	0.87942	0.12058	0	0	-0.07085	0	0	0.87942	0.12033	0.00024	0
2	01:04:03	Chulpan_(rye)	S._cereale_Chulpan	Phosphorite	2021-03-29 17:03:47	434419	0.13969	0	0.00117	0.03852	0.96031	0	0	208.115	242.795	150.086	0.00026	0.01913	0.85526	0.12023	0.00513	0	18.278	2087.39	0.052	585.443	3.18809	142.021	0.44553	0	0	0.01796	0.56137	0.42067	0	-0.09723	0	0.00022	0.91065	0.08913	0	0	-0.08328	0.00043	0.00153	0.9089	0.08785	0.00131	0
2	01:05:01	LD222_Rht17_NIL	T._durum_LD222_Rht17_NIL	Phosphorite	2021-03-29 17:03:47	319694	0.14444	0.00036	0.00053	0.06552	0.9332	0.00039	0	225.191	250.89	160.267	0	0.00487	0.77425	0.22	0.00088	0	21.665	1419.66	0.035	465.779	2.70849	134.509	0.49272	0	0	0.00797	0.42294	0.56908	0	-0.14597	0	0.00491	0.89437	0.10071	0	0	-0.12705	0.00076	0.01968	0.87883	0.10073	0	0
2	01:05:02	LD222_Rht17_NIL	T._durum_LD222_Rht17_NIL	Phosphorite	2021-03-29 17:03:47	364173	0.16926	0	0.0015	0.0155	0.98299	0	0	218.722	239.282	153.718	0	0.00726	0.88549	0.10293	0.00431	0	22.306	1665.01	0.041	599.118	2.63451	145.194	0.5289	0	0	0.00276	0.39557	0.60168	0	-0.14356	0.00022	0.00202	0.93881	0.05894	0	0	-0.10677	0.00069	0.00242	0.93794	0.05894	0	0
2	01:05:03	LD222_Rht17_NIL	T._durum_LD222_Rht17_NIL	Phosphorite	2021-03-29 17:03:47	307763	0.17399	0	0	0.05825	0.94133	0.00042	0	236.108	266.74	152.471	0	0.00789	0.83432	0.15617	0.00162	0	20.218	1303.48	0.032	381.802	2.89335	138.217	0.51513	0	0	0.00711	0.46876	0.52413	0	-0.13038	0	0.00023	0.92072	0.07803	0.00102	0	-0.10338	0	0.01148	0.90947	0.0783	0.00075	0
2	01:06:01	LD222_(tall_wheat)	LD222_recurrent_parent_(tall)	Phosphorite	2021-03-29 17:03:47	402222	0.14036	0.00027	0.00014	0.05813	0.94145	0	0	237.168	273.825	161.757	0	0.0104	0.75648	0.23101	0.00212	0	20.451	1695.94	0.042	551.105	2.86171	152.247	0.48554	0	0	0.00386	0.4817	0.51444	0	-0.14855	0	0.00076	0.93233	0.06691	0	0	-0.1221	0.00014	0.00065	0.93229	0.06691	0	0
2	01:06:02	LD222_(tall_wheat)	LD222_recurrent_parent_(tall)	Phosphorite	2021-03-29 17:03:47	397949	0.18015	0	0	0.0222	0.97759	0.00021	0	199.162	236.818	145.334	0	0.01055	0.90229	0.08586	0.00129	0	26.784	1998.12	0.049	832.444	2.21896	116.694	0.52031	0	0	0.0088	0.33891	0.65228	0	-0.10443	0	0.0006	0.89426	0.10514	0	0	-0.0767	0.00035	0.00227	0.89224	0.10485	0.00029	0
2	01:06:03	LD222_(tall_wheat)	LD222_recurrent_parent_(tall)	Phosphorite	2021-03-29 17:03:47	210668	0.18006	0	0	0.06981	0.92804	0.00215	0	252.845	261.477	138.005	0	0.03037	0.82122	0.1464	0.00201	0	26.51	833.193	0.021	323.586	2.24025	130.176	0.45459	0	0	0.01734	0.52867	0.45399	0	-0.06317	0	0.00228	0.72883	0.26849	0.0004	0	-0.06566	0	0.0219	0.70921	0.26825	0.00064	0
2	01:07:01	Chulpan_(rye)	S._cereale_Chulpan	KH2PO4	2021-03-29 17:03:47	634980	0.17416	0.00015	0.00038	0.04146	0.95765	0.00036	0	211.042	266.06	149.378	0	0.00928	0.84677	0.14176	0.00219	0	22.25	3008.78	0.074	1030.1	2.64077	176.797	0.52304	0.00015	0	0.00465	0.39148	0.60373	0	-0.11875	0	0.0016	0.87216	0.12625	0	0	-0.09144	6e-05	0.00815	0.86554	0.12617	7e-05	0
2	01:07:02	Chulpan_(rye)	S._cereale_Chulpan	KH2PO4	2021-03-29 17:03:47	725338	0.19422	0	0	0.01174	0.98826	0	0	210.358	241.502	139.995	0	0.00752	0.93487	0.05752	8e-05	0	18.518	3448.11	0.085	1019.46	3.14828	142.616	0.48912	0.00017	6e-05	0.00647	0.46374	0.52957	0	-0.08198	0	0	0.8599	0.14004	6e-05	0	-0.06571	0	0	0.8599	0.13982	0.00016	0.00012
2	01:07:03	Chulpan_(rye)	S._cereale_Chulpan	KH2PO4	2021-03-29 17:03:47	787174	0.24578	0.00012	0	0.01571	0.97256	0.0116	0	228.571	291.079	132.644	0	0.00997	0.94762	0.03965	0.00277	0	21.047	3443.89	0.085	1124.49	2.78416	146.04	0.56403	0	0	0.01241	0.2672	0.7204	0	-0.06303	0.00012	0.00176	0.78682	0.21053	0.00077	0	-0.03871	0	0.00051	0.78819	0.21108	0.00022	0
2	01:08:01	LD222_Rht17_NIL	T._durum_LD222_Rht17_NIL	KH2PO4	2021-03-29 17:03:47	731675	0.15895	0	0.00033	0.10978	0.88768	0.00222	0	225.249	246.637	159.168	0	0.01178	0.70372	0.28299	0.00151	0	22.344	3248.3	0.08	1112.66	2.63017	159.05	0.54476	0	0	0.00578	0.30427	0.68994	0	-0.17208	0	0.02222	0.83792	0.1396	0.00025	0	-0.14464	0.00288	0.03833	0.81894	0.13954	0.00031	0
2	01:08:02	LD222_Rht17_NIL	T._durum_LD222_Rht17_NIL	KH2PO4	2021-03-29 17:03:47	641633	0.22199	0	0	0.02309	0.97691	0	0	227.798	266.281	140.171	0	0.00409	0.93044	0.0649	0.00057	0	24.28	2816.68	0.069	1077.31	2.43178	164.272	0.54011	0	0	0.00826	0.29141	0.70034	0	-0.09347	0	8e-05	0.88345	0.11647	0	0	-0.06246	0	8e-05	0.88345	0.11647	0	0
2	01:08:03	LD222_Rht17_NIL	T._durum_LD222_Rht17_NIL	KH2PO4	2021-03-29 17:03:47	519474	0.24549	0	0.00028	0.04239	0.94403	0.0133	0	205.604	222.039	137.541	0	0.01532	0.88136	0.10023	0.00309	0	23.154	2526.57	0.062	869.407	2.54299	119.611	0.55727	0	0	0.01882	0.24897	0.73221	0	-0.07498	0	0.00013	0.79058	0.20838	0.00092	0	-0.05694	0	0.00032	0.79039	0.20898	0.00031	0
2	01:09:01	LD222_(tall_wheat)	LD222_recurrent_parent_(tall)	KH2PO4	2021-03-29 17:03:47	756770	0.19937	0	7e-05	0.02396	0.97518	0.00078	0	277.656	326.041	146.844	0	0.00485	0.86774	0.1271	0.00031	0	26.712	2725.56	0.067	1156.72	2.22449	180.612	0.54572	0	0	0.00497	0.28922	0.70581	0	-0.11891	0	0.00029	0.86614	0.13357	0	0	-0.09158	0	0.0017	0.86473	0.13357	0	0
2	01:09:02	LD222_(tall_wheat)	LD222_recurrent_parent_(tall)	KH2PO4	2021-03-29 17:03:47	788015	0.20455	0	0	0.01951	0.98049	0	0	274.849	333.76	142.091	0	0.00777	0.89342	0.09812	0.0007	0	23.594	2867.08	0.071	1087.51	2.49822	183.227	0.53438	0	0	0.00645	0.31162	0.68192	0	-0.09506	0	0.00076	0.86936	0.12988	0	0	-0.07281	0	0.00253	0.86759	0.12988	0	0
2	01:09:03	LD222_(tall_wheat)	LD222_recurrent_parent_(tall)	KH2PO4	2021-03-29 17:03:47	480377	0.27817	0	0	0.03415	0.94817	0.01768	0	227.003	276.958	125.978	0	0.02077	0.9229	0.05431	0.00202	0	27.291	2116.17	0.052	881.764	2.18081	137.436	0.58432	0	0	0.01147	0.18177	0.80676	0	-0.02147	0	0.00137	0.60027	0.39712	0.00124	0	-0.0184	0	0.00227	0.59937	0.39803	0.00033	0
1	02:01:01	Chulpan_(rye)	S._cereale_Chulpan	w/o_P	2021-03-29 18:28:39	115776	0.16558	0	0	0.02849	0.97151	0	0	191.254	229.688	137.013	0	0.02442	0.87198	0.10219	0.00141	0	14.742	605.354	0.015	136.352	3.92909	149.339	0.48653	0	0	0.00195	0.55066	0.44739	0	-0.04547	0	0	0.74551	0.25449	0	0	-0.04276	0	0	0.74551	0.25449	0	0
1	02:01:02	Chulpan_(rye)	S._cereale_Chulpan	w/o_P	2021-03-29 18:28:39	254088	0.08073	0	0	0.10541	0.89459	0	0	234.229	270.509	170.447	0.00066	0.00549	0.65883	0.33044	0.00459	0	11.879	1084.79	0.027	199.416	4.85691	160.118	0.35727	0	0.0004	0.0087	0.83447	0.15643	0	-0.10753	0	0	0.963	0.037	0	0	-0.11458	0.00042	0.00017	0.96242	0.0366	0	0.0004
1	02:01:03	Chulpan_(rye)	S._cereale_Chulpan	w/o_P	2021-03-29 18:28:39	45053.3	0.10554	0	0	0.06308	0.93692	0	0	194.296	204.519	158.393	0	0.0055	0.78846	0.20209	0.00396	0	9.928	231.88	0.006	26.892	5.79863	144.26	0.4032	0	0	0.00097	0.73691	0.26213	0	-0.1018	0	0	0.95097	0.04903	0	0	-0.09668	0	0.00199	0.94898	0.04903	0	0
1	02:02:01	LD222_Rht17_NIL	T._durum_LD222_Rht17_NIL	w/o_P	2021-03-29 18:28:39	203897	0.14064	0	0	0.09853	0.90147	0	0	245.117	290.61	159.242	0	0.01301	0.69201	0.29173	0.00325	0	19.65	831.835	0.021	265.791	2.9735	185.773	0.47799	0	0	0.00786	0.53265	0.45949	0	-0.13236	0	0.0016	0.8832	0.11495	0.00025	0	-0.12374	0	0.00728	0.87752	0.11519	0	0
1	02:02:02	LD222_Rht17_NIL	T._durum_LD222_Rht17_NIL	w/o_P	2021-03-29 18:28:39	249596	0.15704	0	0	0.05176	0.94824	0	0	243.719	278.594	148.292	0.00037	0.0082	0.86317	0.12491	0.00334	0	18.52	1024.11	0.025	304.626	3.14787	154.133	0.4572	0	0	0.0154	0.50249	0.48211	0	-0.09888	0	0	0.9223	0.0777	0	0	-0.0871	0	0.00319	0.91911	0.0777	0	0
1	02:02:03	LD222_Rht17_NIL	T._durum_LD222_Rht17_NIL	w/o_P	2021-03-29 18:28:39	275786	0.17996	0	0	0.03765	0.9605	0.00185	0	248.183	293.21	146.454	0.00033	0.01086	0.83605	0.15221	0.00055	0	16.409	1111.22	0.027	280.159	3.53943	167.12	0.49801	0	0.00025	0.01808	0.41235	0.56932	0	-0.10381	0	0.00023	0.88282	0.1167	0.00025	0	-0.08622	0	0.00079	0.88248	0.1163	0	0.00043
1	02:03:01	LD222_(tall_wheat)	LD222_recurrent_parent_(tall)	w/o_P	2021-03-29 18:28:39	225385	0.15559	0	0.00044	0.04104	0.95852	0	0	219.618	272.664	148.638	0	0.035	0.82569	0.1359	0.00342	0	29.532	1026.26	0.025	437.999	2.02868	107.274	0.4835	0	0	0.0038	0.47326	0.52294	0	-0.10662	0	0	0.86292	0.13708	0	0	-0.08137	0	0.00049	0.86242	0.13708	0	0
1	02:03:02	LD222_(tall_wheat)	LD222_recurrent_parent_(tall)	w/o_P	2021-03-29 18:28:39	458457	0.16722	0	0.0003	0.02853	0.97117	0	0	298.966	329.316	146.442	0.00015	0.02289	0.85847	0.11736	0.00113	0	23.658	1533.48	0.038	540.359	2.49187	189.397	0.46228	0	0	0.00379	0.51544	0.48078	0	-0.08798	0	0	0.87399	0.12601	0	0	-0.07735	0	0	0.87399	0.12589	0.00011	0
1	02:03:03	LD222_(tall_wheat)	LD222_recurrent_parent_(tall)	w/o_P	2021-03-29 18:28:39	132097	0.20424	0	0	0.0236	0.96087	0.01553	0	284.379	296.328	131.473	0	0.0472	0.88721	0.06265	0.00295	0	26.89	464.51	0.011	203.758	2.21091	152.648	0.52905	0	0	0.00476	0.39482	0.60042	0	-0.04093	0	0	0.71135	0.27623	0.01243	0	-0.02291	0	0	0.71135	0.28422	0.00264	0.0018
1	02:04:01	Chulpan_(rye)	S._cereale_Chulpan	Phosphorite	2021-03-29 18:28:39	310493	0.14379	0	0	0.0596	0.93962	0.00078	0	194.914	248.263	156.951	0	0.00797	0.74586	0.24335	0.00282	0	13.146	1592.98	0.039	329.034	4.396	135.769	0.48688	0	0	0.00156	0.54803	0.45042	0	-0.11705	0	0.00233	0.90263	0.09504	0	0	-0.10444	0	0.00331	0.90165	0.09504	0	0
1	02:04:02	Chulpan_(rye)	S._cereale_Chulpan	Phosphorite	2021-03-29 18:28:39	533236	0.14893	0	0	0.01067	0.98933	0	0	226.38	252.202	150.159	0	0.00979	0.90585	0.08436	0	0	14.908	2355.49	0.058	554.046	3.88639	162.641	0.47514	0	0	0.00342	0.50476	0.49182	0	-0.11088	0	0.00011	0.91786	0.08204	0	0	-0.08527	9e-05	0.00011	0.91777	0.08179	0.00025	0
1	02:04:03	Chulpan_(rye)	S._cereale_Chulpan	Phosphorite	2021-03-29 18:28:39	157906	0.19061	0	0	0.03116	0.96856	0.00027	0	162.252	190.147	132.999	0.00044	0.04013	0.89692	0.05867	0.00383	0	23.97	973.213	0.024	343.145	2.46134	111.941	0.50079	0	0	0.01837	0.42579	0.55585	0	-0.04608	0	0	0.76099	0.23769	0.00132	0	-0.02883	0	0.00059	0.7604	0.23754	0.00147	0
1	02:05:01	LD222_Rht17_NIL	T._durum_LD222_Rht17_NIL	Phosphorite	2021-03-29 18:28:39	287895	0.1786	0	0	0.04268	0.9562	0.00113	0	245.651	270.843	147.631	0	0.01054	0.84731	0.13869	0.00346	0	15.976	1171.97	0.029	295.893	3.63272	177.713	0.52069	0	0	0.00113	0.38324	0.61563	0	-0.09865	0	0	0.83084	0.16916	0	0	-0.07903	0	0	0.83084	0.16916	0	0
1	02:05:02	LD222_Rht17_NIL	T._durum_LD222_Rht17_NIL	Phosphorite	2021-03-29 18:28:39	360864	0.16367	0	0	0.03027	0.96973	0	0	252.127	278.087	151.433	0	0.00818	0.88734	0.09898	0.0055	0	16.791	1431.28	0.035	386.185	3.4612	142.466	0.47404	0	0	0.01192	0.45728	0.5308	0	-0.11845	0	0.00056	0.94951	0.04993	0	0	-0.09674	0.00067	0.00067	0.94874	0.04993	0	0
1	02:05:03	LD222_Rht17_NIL	T._durum_LD222_Rht17_NIL	Phosphorite	2021-03-29 18:28:39	272974	0.18145	0	0	0.02308	0.97187	0.00505	0	243.453	268.952	147.895	0	0.0148	0.85816	0.12486	0.00217	0	13.677	1121.26	0.028	225.121	4.22867	173.59	0.48819	0	0	0.014	0.48667	0.49934	0	-0.10505	0	0	0.86799	0.13098	0.00103	0	-0.08519	0	0	0.86799	0.13043	0.0011	0.00047
1	02:06:01	LD222_(tall_wheat)	LD222_recurrent_parent_(tall)	Phosphorite	2021-03-29 18:28:39	333896	0.19654	0.00043	0.00043	0.01519	0.98373	0.00022	0	266.051	309.423	140.753	0	0.00995	0.89582	0.09248	0.00175	0	14.968	1255.01	0.031	295.922	3.87123	155.216	0.54413	0	0	0.00201	0.33661	0.66137	0	-0.08648	0	0.00086	0.85053	0.14861	0	0	-0.06628	0.00192	0.00135	0.84813	0.14861	0	0
1	02:06:02	LD222_(tall_wheat)	LD222_recurrent_parent_(tall)	Phosphorite	2021-03-29 18:28:39	440510	0.18922	0.00015	0.00021	0.02279	0.97685	0	0	244.548	261.357	139.503	0	0.011	0.92443	0.06381	0.00076	0	27.33	1801.32	0.044	720.588	2.17796	123.087	0.48668	0	0	0.00769	0.39077	0.60154	0	-0.07574	0.00043	0.00062	0.83454	0.16441	0	0	-0.05999	0.00025	0.00042	0.83492	0.16441	0	0
1	02:06:03	LD222_(tall_wheat)	LD222_recurrent_parent_(tall)	Phosphorite	2021-03-29 18:28:39	388423	0.19009	0	0	0.03785	0.96005	0.0021	0	282.141	291.008	139.887	0	0.02575	0.883	0.08722	0.00404	0	23.889	1376.7	0.034	508.121	2.46913	160.499	0.50939	0	0	0.01607	0.40685	0.57708	0	-0.07515	0	0.00027	0.77792	0.22181	0	0	-0.05134	0	0.00068	0.77751	0.22102	0.00079	0
1	02:07:01	Chulpan_(rye)	S._cereale_Chulpan	KH2PO4	2021-03-29 18:28:39	441040	0.2191	0	0	0.02681	0.97201	0.00118	0	173.156	246.726	133.942	0	0.01319	0.90457	0.08194	0.00031	0	16.703	2547.07	0.063	640.543	3.47887	126.07	0.57002	0	0	0.00016	0.23528	0.76455	0	-0.05952	0	0	0.73951	0.26037	0.00012	0	-0.04421	0	0.00089	0.73861	0.26049	0	0
1	02:07:02	Chulpan_(rye)	S._cereale_Chulpan	KH2PO4	2021-03-29 18:28:39	698504	0.17791	6e-05	0.0006	0.02402	0.97532	0	0	226.211	292.329	145.785	0.00019	0.00597	0.90409	0.08866	0.00109	0	19.666	3087.84	0.076	943.14	2.97108	139.189	0.50651	0	0.00011	0.00452	0.41324	0.58214	0	-0.09628	0.00021	0.00093	0.89142	0.10744	0	0	-0.07491	0.00073	0.00134	0.8905	0.10737	6e-05	0
1	02:07:03	Chulpan_(rye)	S._cereale_Chulpan	KH2PO4	2021-03-29 18:28:39	593368	0.20377	0	0.00019	0.01778	0.98084	0.00119	0	234.442	270.91	135.683	0	0.01468	0.93175	0.05067	0.00291	0	21.621	2530.98	0.062	823.111	2.71373	123.864	0.51824	0	0	0.0076	0.40971	0.58269	0	-0.05757	0	0.00043	0.79243	0.2053	0.00183	0	-0.04261	0	0.00061	0.79226	0.20549	0.00126	0.00039
1	02:08:01	LD222_Rht17_NIL	T._durum_LD222_Rht17_NIL	KH2PO4	2021-03-29 18:28:39	546317	0.21368	0	0	0.03618	0.96331	0.00051	0	253.746	281.107	138.82	0	0.01889	0.89365	0.0836	0.00386	0	15.454	2153	0.053	473.201	3.75234	203.939	0.57146	0	0	0.00054	0.24617	0.75329	0	-0.08303	0	0.00142	0.79352	0.20474	0.00031	0	-0.0563	0.0001	0.00058	0.79426	0.20479	0.00027	0
1	02:08:02	LD222_Rht17_NIL	T._durum_LD222_Rht17_NIL	KH2PO4	2021-03-29 18:28:39	551725	0.20318	0	0	0.00723	0.99277	0	0	262.483	322.755	140.471	0.00043	0.01129	0.92769	0.06059	0	0	21.346	2101.94	0.052	706.993	2.74697	183.73	0.53232	0	0	0.00348	0.33533	0.66119	0	-0.08946	0	0	0.85532	0.14423	0.00045	0	-0.06576	0	0.00071	0.8546	0.14444	0.00024	0
1	02:08:03	LD222_Rht17_NIL	T._durum_LD222_Rht17_NIL	KH2PO4	2021-03-29 18:28:39	519279	0.24481	0	0	0.00861	0.98687	0.00452	0	263.698	308.065	134.541	0.0002	0.02324	0.93929	0.03598	0.0013	0	20.196	1969.22	0.049	601.52	2.89633	176.277	0.56016	0	0	0.00622	0.28034	0.71345	0	-0.07399	0	0	0.81357	0.18543	0.001	0	-0.04223	0	0	0.81357	0.18484	0.00145	0.00013
1	02:09:01	LD222_(tall_wheat)	LD222_recurrent_parent_(tall)	KH2PO4	2021-03-29 18:28:39	641730	0.20024	0	0.00011	0.02565	0.9714	0.00285	0	318.081	338.754	146.712	0	0.01118	0.87624	0.11143	0.00115	0	24.818	2017.5	0.05	784.882	2.38226	244.711	0.54926	0	0	0.00035	0.29345	0.70621	0	-0.12611	0.00018	0.00118	0.85579	0.1426	0.00026	0	-0.09	0	0.00215	0.855	0.14271	0.00015	0
1	02:09:02	LD222_(tall_wheat)	LD222_recurrent_parent_(tall)	KH2PO4	2021-03-29 18:28:39	987258	0.24705	0	0	0.00885	0.99097	0.00018	0	317.447	323.042	133.95	0	0.01562	0.95461	0.02894	0.00083	0	26.346	3110	0.077	1316.04	2.25313	192.742	0.57863	0	0	0.00154	0.22055	0.77791	0	-0.07874	0	0	0.83138	0.16848	0.00013	0	-0.04461	0	0	0.83138	0.1679	0.00071	0
1	02:09:03	LD222_(tall_wheat)	LD222_recurrent_parent_(tall)	KH2PO4	2021-03-29 18:28:39	565559	0.26224	0	0	0.00946	0.98276	0.00778	0	252.52	258.047	127.183	0	0.02308	0.95149	0.02375	0.00167	0	26.047	2239.66	0.055	912.088	2.27715	200.268	0.56913	0	0.00026	0.00797	0.22945	0.76232	0	-0.03148	0	0.00101	0.62778	0.36904	0.00217	0	-0.01874	0	9e-05	0.6287	0.37016	0.00079	0.00026
2	02:01:01	Chulpan_(rye)	S._cereale_Chulpan	w/o_P	2021-03-29 18:34:59	119838	0.15204	0	0	0.0514	0.9486	0	0	214.431	233.047	147.032	0	0.03479	0.73346	0.23006	0.00169	0	18.706	558.866	0.014	158.285	3.11771	161.26	0.45205	0	0	0.00067	0.63496	0.36436	0	-0.07032	0	0	0.75437	0.24563	0	0	-0.07161	0	0	0.75437	0.24516	0.00047	0
2	02:01:02	Chulpan_(rye)	S._cereale_Chulpan	w/o_P	2021-03-29 18:34:59	177904	0.09702	0	0	0.07538	0.92462	0	0	225.203	259.253	162.731	0	0.01565	0.74504	0.2319	0.0074	0	11.892	789.972	0.019	157.675	4.85188	148.456	0.42665	0	0	0.00689	0.60971	0.3834	0	-0.10529	0	0	0.95013	0.04987	0	0	-0.09305	0	0	0.95013	0.04987	0	0
2	02:01:03	Chulpan_(rye)	S._cereale_Chulpan	w/o_P	2021-03-29 18:34:59	56780	0.11167	0	0	0.02752	0.97248	0	0	176.975	205.377	159.45	0	0.00261	0.83179	0.1656	0	0	8.532	320.836	0.008	28.144	6.73821	108.54	0.36904	0	0.00236	0.01065	0.86999	0.117	0	-0.11892	0	0	0.93512	0.06488	0	0	-0.12118	0.00118	0	0.93393	0.06371	0.00117	0
2	02:02:01	LD222_Rht17_NIL	T._durum_LD222_Rht17_NIL	w/o_P	2021-03-29 18:34:59	176554	0.10143	0	0	0.08174	0.91826	0	0	273.224	295.219	171.244	0	0.01456	0.62905	0.35366	0.00273	0	17.603	646.186	0.016	178.144	3.30629	185.832	0.41087	0	0	0.00744	0.66919	0.32337	0	-0.15816	0	0	0.9366	0.06289	0.00051	0	-0.15813	0	0.00845	0.92816	0.06156	0.00184	0
2	02:02:02	LD222_Rht17_NIL	T._durum_LD222_Rht17_NIL	w/o_P	2021-03-29 18:34:59	296488	0.14998	0	0	0.03376	0.96624	0	0	237.334	292.411	155.095	0	0.00766	0.8148	0.17493	0.0026	0	16.707	1249.24	0.031	343.374	3.47803	163.089	0.48387	0	0	0.00038	0.51288	0.48674	0	-0.12819	0	0	0.95973	0.04027	0	0	-0.11465	0	0.00124	0.95849	0.04027	0	0
2	02:02:03	LD222_Rht17_NIL	T._durum_LD222_Rht17_NIL	w/o_P	2021-03-29 18:34:59	300087	0.20056	0	0	0.04482	0.94253	0.01265	0	267.884	293.039	143.396	0	0.02657	0.84721	0.12435	0.00187	0	20.023	1120.21	0.028	306.777	2.92027	174.572	0.51526	0	0	0.01315	0.45618	0.53067	0	-0.09405	0	0	0.82273	0.17518	0.00209	0	-0.06907	0	0.00081	0.82192	0.17646	0.00081	0
2	02:03:01	LD222_(tall_wheat)	LD222_recurrent_parent_(tall)	w/o_P	2021-03-29 18:34:59	246208	0.20748	0	0	0.03948	0.95942	0.00109	0	217.564	222.794	137.868	0	0.00886	0.89119	0.09762	0.00233	0	24.584	1131.66	0.028	455.215	2.40354	104.421	0.55246	0	0	0.00353	0.25305	0.74342	0	-0.08699	0	0.01269	0.78953	0.19779	0	0	-0.06352	0	0.01405	0.78816	0.19779	0	0
2	02:03:02	LD222_(tall_wheat)	LD222_recurrent_parent_(tall)	w/o_P	2021-03-29 18:34:59	357558	0.17595	0	0	0.02075	0.97925	0	0	290.226	328.519	147.131	0.00021	0.02522	0.895	0.07591	0.00367	0	20.323	1232	0.03	394.88	2.87902	192.191	0.50108	0	0	0.0112	0.3678	0.621	0	-0.10814	0	0	0.87875	0.12125	0	0	-0.08093	0.00034	0.00062	0.87779	0.12125	0	0
2	02:03:03	LD222_(tall_wheat)	LD222_recurrent_parent_(tall)	w/o_P	2021-03-29 18:34:59	301679	0.1836	0	0	0.04226	0.9569	0.00084	0	277.17	294.528	139.124	0	0.05165	0.84446	0.102	0.00189	0	25.642	1088.42	0.027	446.127	2.31069	166.891	0.49289	0	0	0.00326	0.46944	0.5273	0	-0.05792	0	0	0.75715	0.23876	0.0041	0	-0.05115	0	0.00104	0.75611	0.23999	0.00286	0
2	02:04:01	Chulpan_(rye)	S._cereale_Chulpan	Phosphorite	2021-03-29 18:34:59	308017	0.12011	0	0.00031	0.08509	0.9146	0	0	183.612	247.514	159.369	0.00037	0.01455	0.70185	0.28156	0.00168	0	12.217	1677.55	0.041	284.866	4.72463	138.228	0.44443	0	0	0.00153	0.70235	0.29612	0	-0.11146	0	0	0.86498	0.13477	0.00025	0	-0.10447	0	0.00089	0.86409	0.13502	0	0
2	02:04:02	Chulpan_(rye)	S._cereale_Chulpan	Phosphorite	2021-03-29 18:34:59	406885	0.16196	0	0	0.02081	0.97919	0	0	224.897	273.929	148.056	0.00033	0.01577	0.86594	0.11744	0.00053	0	13.546	1809.21	0.045	400.871	4.26874	145.89	0.50355	0	0	0.0004	0.40527	0.59433	0	-0.10037	0	0	0.91066	0.08934	0	0	-0.07831	0	0	0.91066	0.08934	0	0
2	02:04:03	Chulpan_(rye)	S._cereale_Chulpan	Phosphorite	2021-03-29 18:34:59	212914	0.20348	0	0	0.01223	0.98596	0.00182	0	167.391	193.268	132.431	0	0.0193	0.94085	0.03817	0.00168	0	19.928	1271.95	0.031	381.664	2.93359	114.455	0.51381	0	0	0.00869	0.40148	0.58983	0	-0.04656	0	0	0.74041	0.25932	0.00027	0	-0.03094	0	0	0.74041	0.25877	0.00055	0.00027
2	02:05:01	LD222_Rht17_NIL	T._durum_LD222_Rht17_NIL	Phosphorite	2021-03-29 18:34:59	268617	0.13971	0	0	0.05559	0.94441	0	0	233.181	252.876	160.49	0	0.00734	0.76539	0.22188	0.00539	0	16.309	1151.97	0.028	280.906	3.56051	170.032	0.50966	0	0	0.00246	0.39061	0.60693	0	-0.14344	0	0	0.93572	0.06428	0	0	-0.11546	0	0.00099	0.93472	0.06395	0.00033	0
2	02:05:02	LD222_Rht17_NIL	T._durum_LD222_Rht17_NIL	Phosphorite	2021-03-29 18:34:59	430069	0.15451	0	0	0.03046	0.96954	0	0	249.571	277.817	154.871	0	0.01143	0.81434	0.17349	0.00075	0	15.25	1723.23	0.043	431.98	3.80132	155.344	0.48504	0	0	0.00302	0.47797	0.51901	0	-0.13504	0	0	0.94308	0.05692	0	0	-0.11717	0	0.00304	0.94004	0.05692	0	0
2	02:05:03	LD222_Rht17_NIL	T._durum_LD222_Rht17_NIL	Phosphorite	2021-03-29 18:34:59	279066	0.19867	0	0	0.02459	0.97506	0.00035	0	251.184	283.975	144.885	0	0.0165	0.87874	0.1019	0.00286	0	12.102	1111.01	0.027	165.718	4.7689	143.515	0.53266	0	0	0.00324	0.3463	0.65046	0	-0.10495	0	0	0.88549	0.11313	0.00137	0	-0.07285	0	0	0.88549	0.1135	0.00101	0
2	02:06:01	LD222_(tall_wheat)	LD222_recurrent_parent_(tall)	Phosphorite	2021-03-29 18:34:59	415844	0.16507	0	0.00035	0.06768	0.93057	0.00139	0	299.343	347.91	152.907	0.00023	0.01828	0.73967	0.23945	0.00236	0	16.893	1389.19	0.034	369.706	3.44094	188.295	0.49974	0	0	0.00366	0.51658	0.47976	0	-0.11612	0	0	0.85824	0.14116	0.0006	0	-0.1005	0	0.00137	0.85687	0.14032	0.00144	0
2	02:06:02	LD222_(tall_wheat)	LD222_recurrent_parent_(tall)	Phosphorite	2021-03-29 18:34:59	477647	0.1828	0	0	0.00817	0.99183	0	0	244.07	264.881	143.934	0	0.01833	0.91388	0.06778	0	0	28.195	1957.01	0.048	890.831	2.11639	120.116	0.50576	0	0	0.00141	0.42661	0.57198	0	-0.09849	0.00019	0.001	0.85354	0.14527	0	0	-0.07768	0	0	0.85473	0.14499	0.00028	0
2	02:06:03	LD222_(tall_wheat)	LD222_recurrent_parent_(tall)	Phosphorite	2021-03-29 18:34:59	414769	0.1904	0	0	0.04706	0.95007	0.00287	0	280.514	297.039	141.068	0.0002	0.03011	0.82831	0.13927	0.0021	0	21.627	1478.6	0.036	473.898	2.71301	180.038	0.49865	0	0.00066	0.01828	0.45097	0.5301	0	-0.07253	0	0	0.78372	0.21566	0.00063	0	-0.0544	0	0	0.78372	0.21447	0.00149	0.00032
2	02:07:01	Chulpan_(rye)	S._cereale_Chulpan	KH2PO4	2021-03-29 18:34:59	513814	0.17096	0.00068	0.00069	0.03191	0.96524	0.00148	0	163.597	245.413	145.803	0.0001	0.00714	0.86044	0.13113	0.00119	0	16.783	3140.73	0.077	809.279	3.46284	125.514	0.51448	0.00013	0	0.00114	0.40923	0.58949	0	-0.0896	0.00013	0.0015	0.83745	0.15975	0.00116	0	-0.07654	0.00034	0.00185	0.83687	0.16094	0	0
2	02:07:02	Chulpan_(rye)	S._cereale_Chulpan	KH2PO4	2021-03-29 18:34:59	745944	0.17636	0	9e-05	0.0219	0.97766	0.00035	0	246.406	293.274	147.984	0	0.00458	0.91807	0.07508	0.00228	0	19.528	3027.3	0.075	941.902	2.99134	170.523	0.52523	0	0	0.00694	0.36475	0.62831	0	-0.11492	0	0	0.93515	0.06485	0	0	-0.07823	0	0.00015	0.935	0.06477	9e-05	0
2	02:07:03	Chulpan_(rye)	S._cereale_Chulpan	KH2PO4	2021-03-29 18:34:59	801036	0.23975	0	0.00015	0.01068	0.98316	0.00601	0	236.293	271.774	130.627	0	0.01956	0.9478	0.03164	0.00101	0	20.181	3390.02	0.084	980.586	2.89832	150.729	0.55777	0	0	0.0079	0.29096	0.70115	0	-0.04192	0	0.00041	0.73933	0.2584	0.00186	0	-0.02664	0	0.00024	0.7395	0.25845	0.00174	6e-05
2	02:08:01	LD222_Rht17_NIL	T._durum_LD222_Rht17_NIL	KH2PO4	2021-03-29 18:34:59	605543	0.19285	0	0	0.04216	0.95741	0.00043	0	257.84	275.318	147.905	0	0.00794	0.84449	0.14624	0.00133	0	16.783	2348.52	0.058	577.982	3.46276	197.8	0.55645	0	0	0.00074	0.27009	0.72918	0	-0.12096	0	0.00079	0.87415	0.12489	0.00017	0	-0.08942	0	7e-05	0.87487	0.1246	0.00046	0
2	02:08:02	LD222_Rht17_NIL	T._durum_LD222_Rht17_NIL	KH2PO4	2021-03-29 18:34:59	810986	0.18062	5e-05	7e-05	0.01863	0.98119	6e-05	0	254.977	272.298	147.421	0.0002	0.00709	0.90819	0.08243	0.00209	0	16.456	3180.62	0.078	759.056	3.52973	162.59	0.50544	5e-05	0.00019	0.00746	0.37196	0.62034	0	-0.11348	0.00011	0.00031	0.91225	0.08734	0	0	-0.08734	0.00028	0.00019	0.91219	0.08723	0	0.0001
2	02:08:03	LD222_Rht17_NIL	T._durum_LD222_Rht17_NIL	KH2PO4	2021-03-29 18:34:59	470590	0.21525	0	0.00069	0.02051	0.97794	0.00086	0	237.133	308.17	141.108	0	0.01073	0.92199	0.06467	0.00261	0	19.472	1984.5	0.049	604.182	2.99952	141.989	0.55835	0	0	0.00545	0.23597	0.75858	0	-0.10583	0	0.00038	0.85424	0.14513	0.00025	0	-0.07438	0	0.00102	0.8536	0.14525	0.00013	0
2	02:09:01	LD222_(tall_wheat)	LD222_recurrent_parent_(tall)	KH2PO4	2021-03-29 18:34:59	814084	0.25671	0.00056	0.00048	0.01044	0.9878	0.00072	0	312.181	333.256	131.251	0	0.0075	0.96318	0.02686	0.00246	0	22.976	2607.73	0.064	903.392	2.56166	191.813	0.6093	0	0	0.00063	0.13969	0.85968	0	-0.05976	0.00014	0.00168	0.74022	0.25796	0	0	-0.03646	0	0.00138	0.74066	0.25796	0	0
2	02:09:02	LD222_(tall_wheat)	LD222_recurrent_parent_(tall)	KH2PO4	2021-03-29 18:34:59	872270	0.23988	0	0	0.01258	0.98743	0	0	315.25	323.242	131.659	0	0.01326	0.94385	0.04238	0.00052	0	26.766	2766.92	0.068	1091.49	2.22038	197.23	0.54478	0.00016	0	0.00983	0.26569	0.72432	0	-0.04641	0	0.00016	0.73705	0.2628	0	0	-0.03796	0	0.0002	0.737	0.26249	0.00031	0
2	02:09:03	LD222_(tall_wheat)	LD222_recurrent_parent_(tall)	KH2PO4	2021-03-29 18:34:59	757546	0.27272	0	8e-05	0.00994	0.98561	0.00436	0	253.081	258.108	125.885	0	0.01986	0.95332	0.02562	0.0012	0	26.613	2993.29	0.074	1226.29	2.23222	173.971	0.58122	0	0	0.0067	0.21098	0.78231	0	-0.02445	0	8e-05	0.63184	0.36727	0.00081	0	-0.01537	0	0.00022	0.6317	0.36757	0.00043	8e-05
1	01:01:01	Chulpan_(rye)	S._cereale_Chulpan	w/o_P	2021-03-31 16:52:17	213304	0.09946	0.00037	0.00053	0.03709	0.96201	0	0	183.903	219.263	163.097	0	0.02982	0.77056	0.19142	0.00821	0	19.856	1159.87	0.029	383.918	2.94382	116.674	0.41389	0.00037	0	0.0035	0.77539	0.22074	0	-0.12634	0	0	0.91233	0.08767	0	0	-0.11552	0.00039	0.00076	0.91119	0.08767	0	0
1	01:01:02	Chulpan_(rye)	S._cereale_Chulpan	w/o_P	2021-03-31 16:52:17	242159	0.09662	0	0	0.03635	0.96365	0	0	193.906	228.822	161.323	0.00071	0.02866	0.77794	0.19114	0.00156	0	12.784	1248.84	0.031	257.415	4.51842	130.112	0.35231	0	0	0.024	0.84589	0.13011	0	-0.10586	0	0	0.90061	0.09939	0	0	-0.10999	0	0.00118	0.89943	0.09904	0.00035	0
1	01:01:03	Chulpan_(rye)	S._cereale_Chulpan	w/o_P	2021-03-31 16:52:17	98309.7	0.15897	0	0	0.0185	0.9815	0	0	222	235.987	142.715	0	0.02743	0.86477	0.10602	0.00178	0	12.457	442.836	0.011	84.881	4.63512	155.689	0.47224	0	0	0.00223	0.5473	0.45047	0	-0.07328	0	0	0.82462	0.17538	0	0	-0.05996	0	0	0.82462	0.17538	0	0
1	01:02:01	LD222_Rht17_NIL	T._durum_LD222_Rht17_NIL	w/o_P	2021-03-31 16:52:17	241455	0.16537	0	0	0.06049	0.93898	0.00053	0	251.738	280.531	149.596	0	0.01366	0.82255	0.1612	0.00259	0	18.14	959.152	0.024	277.323	3.21152	168.869	0.49638	0	0	0.00446	0.49911	0.49643	0	-0.11664	0	0.00461	0.85756	0.13756	0.00027	0	-0.10542	0	0.02237	0.8398	0.13783	0	0
1	01:02:02	LD222_Rht17_NIL	T._durum_LD222_Rht17_NIL	w/o_P	2021-03-31 16:52:17	300364	0.16915	0	0	0.01881	0.98119	0	0	216.211	238.914	147.192	0	0.01012	0.91079	0.07765	0.00145	0	21.228	1389.22	0.034	471.378	2.76155	125.369	0.49445	0.00017	0	0.00595	0.39526	0.59862	0	-0.1055	0	0	0.88659	0.11341	0	0	-0.08078	0	0	0.88659	0.11341	0	0
1	01:02:03	LD222_Rht17_NIL	T._durum_LD222_Rht17_NIL	w/o_P	2021-03-31 16:52:17	162551	0.19522	0	0	0.01232	0.9864	0.00128	0	250.173	264.714	138.511	0.00059	0.02064	0.92133	0.05605	0.00139	0	17.429	649.756	0.016	177.868	3.33816	167.707	0.5342	0	0	0.00412	0.31605	0.67983	0	-0.08415	0	0	0.78408	0.21488	0.00104	0	-0.05058	0	0	0.78408	0.21549	0.00043	0
1	01:03:01	LD222_(tall_wheat)	LD222_recurrent_parent_(tall)	w/o_P	2021-03-31 16:52:17	233477	0.20458	0	0	0.05687	0.94195	0.00118	0	264.657	276.649	134.304	0	0.05274	0.82552	0.12023	0.00151	0	31.473	882.188	0.022	445.664	1.91527	178.851	0.5145	0	0	0.00697	0.42528	0.56775	0	-0.05268	0	0.00903	0.6869	0.30406	0	0	-0.04998	0	0.02561	0.67032	0.30381	0.00025	0
1	01:03:02	LD222_(tall_wheat)	LD222_recurrent_parent_(tall)	w/o_P	2021-03-31 16:52:17	406332	0.13418	0	0	0.04834	0.95166	0	0	273.35	294.485	158.699	0	0.02631	0.7699	0.20279	0.00099	0	20.865	1486.49	0.037	443.372	2.80741	168.074	0.43669	0	0	0.00671	0.63799	0.3553	0	-0.12168	0	0	0.93063	0.06937	0	0	-0.11658	0	0.0015	0.92913	0.06937	0	0
1	01:03:03	LD222_(tall_wheat)	LD222_recurrent_parent_(tall)	w/o_P	2021-03-31 16:52:17	225828	0.22059	0	0	0.02755	0.95825	0.0142	0	204.234	231.097	132.057	0.00026	0.03943	0.89209	0.06221	0.00601	0	32.3	1105.73	0.027	573.43	1.87134	105.806	0.51117	0	0	0.02875	0.34518	0.62607	0	-0.04305	0	0.00028	0.70576	0.29351	0.00045	0	-0.03403	0	0	0.70604	0.29378	0.00018	0
1	01:04:01	Chulpan_(rye)	S._cereale_Chulpan	Phosphorite	2021-03-31 16:52:17	354613	0.13188	0	0	0.04836	0.95098	0.00066	0	226.845	275.14	162.544	0	0.00199	0.74657	0.24947	0.00197	0	15.288	1563.24	0.039	359.906	3.7921	177.412	0.46094	0	0	0.00183	0.64525	0.35292	0	-0.13629	0	0.0013	0.95453	0.04417	0	0	-0.1216	0	0.00102	0.95481	0.04417	0	0
1	01:04:02	Chulpan_(rye)	S._cereale_Chulpan	Phosphorite	2021-03-31 16:52:17	497769	0.13349	0	0	0.0259	0.9741	0	0	225.467	268.197	154.192	0.00024	0.00764	0.87437	0.11638	0.00137	0	12.105	2207.73	0.054	391.99	4.76785	151.901	0.45694	0	0	0.00682	0.58717	0.406	0	-0.11252	0	0	0.94762	0.05238	0	0	-0.09548	0	0	0.94762	0.05238	0	0
1	01:04:03	Chulpan_(rye)	S._cereale_Chulpan	Phosphorite	2021-03-31 16:52:17	300467	0.15684	0	0.00018	0.02678	0.97304	0	0	197.722	249.739	147.29	0	0.0116	0.90386	0.08067	0.00388	0	18.362	1519.64	0.037	443.522	3.17406	131.289	0.49221	0	0	0.00849	0.49334	0.49817	0	-0.09473	0	0	0.89921	0.09959	0.00121	0	-0.07036	0	0.00018	0.89902	0.09959	0.00121	0
1	01:05:01	LD222_Rht17_NIL	T._durum_LD222_Rht17_NIL	Phosphorite	2021-03-31 16:52:17	364333	0.16861	0	0	0.08306	0.91526	0.00169	0	230.544	253.892	155.848	0	0.01499	0.69898	0.28406	0.00196	0	19.423	1580.32	0.039	497.711	3.00682	147.956	0.51949	0	0	0.00281	0.44186	0.55533	0	-0.13594	0	0.00433	0.85814	0.13675	0.00078	0	-0.12675	0	0.03051	0.83196	0.13708	0.00045	0
1	01:05:02	LD222_Rht17_NIL	T._durum_LD222_Rht17_NIL	Phosphorite	2021-03-31 16:52:17	509187	0.16227	0.00013	0.00022	0.02085	0.97881	0	0	262.092	275.212	155.563	0	0.00735	0.84995	0.14149	0.00121	0	22.545	1942.78	0.048	712.089	2.60795	180.39	0.50649	0	0	0.00384	0.42329	0.57287	0	-0.14364	0	0.00063	0.93481	0.06456	0	0	-0.11659	0	0.0038	0.93164	0.06436	0.00012	8e-05
1	01:05:03	LD222_Rht17_NIL	T._durum_LD222_Rht17_NIL	Phosphorite	2021-03-31 16:52:17	352928	0.19614	0	0	0.044	0.95137	0.00463	0	241.192	271.596	145.248	0.00026	0.01818	0.8666	0.11274	0.00222	0	16.686	1463.27	0.036	377.63	3.48238	150.449	0.51838	0	0	0.02055	0.34899	0.63047	0	-0.10556	0	0.00059	0.90998	0.08943	0	0	-0.0746	0	0.00047	0.9101	0.08875	0.00068	0
1	01:06:01	LD222_(tall_wheat)	LD222_recurrent_parent_(tall)	Phosphorite	2021-03-31 16:52:17	513419	0.12875	0	0.00052	0.07568	0.9237	0.0001	0	247.709	302.597	164.921	0.00038	0.00978	0.67478	0.31205	0.00301	0	17.2	2072.67	0.051	569.497	3.38136	151.82	0.4891	0	0.0002	0.00121	0.52875	0.46984	0	-0.15582	0	0.00043	0.91555	0.08402	0	0	-0.14089	0.0004	0.00421	0.91138	0.08402	0	0
1	01:06:02	LD222_(tall_wheat)	LD222_recurrent_parent_(tall)	Phosphorite	2021-03-31 16:52:17	520506	0.20059	0	0	0.0205	0.9795	0	0	232.585	283.201	137.425	0	0.01245	0.93104	0.0558	0.00071	0	28.111	2237.92	0.055	985.657	2.12222	147.821	0.53101	0.00012	0	0.00489	0.33108	0.66391	0	-0.07205	0	0.00012	0.83915	0.16073	0	0	-0.05063	0	0	0.83927	0.16073	0	0
1	01:06:03	LD222_(tall_wheat)	LD222_recurrent_parent_(tall)	Phosphorite	2021-03-31 16:52:17	258332	0.15042	0	0	0.02675	0.97325	0	0	305.246	340.104	145.492	0	0.02267	0.88398	0.09129	0.00206	0	17.189	846.307	0.021	220.539	3.38339	212.703	0.42769	0	0.00065	0.02364	0.61123	0.36447	0	-0.08659	0	0	0.8365	0.1627	0.0008	0	-0.07879	0.00105	0.00359	0.83186	0.16112	0.00238	0
1	01:07:01	Chulpan_(rye)	S._cereale_Chulpan	KH2PO4	2021-03-31 16:52:17	769837	0.16684	0.00011	0.00027	0.0447	0.95223	0.00267	0	217.573	239.432	151.879	0.00017	0.00961	0.82876	0.16058	0.00088	0	22.84	3538.29	0.087	1306.22	2.57601	154.515	0.51854	0.00011	0.00017	0.00391	0.41008	0.58573	0	-0.12305	0.00011	0.00603	0.86845	0.12541	0	0	-0.09787	0.00028	0.0102	0.8641	0.12466	0.00046	0.00028
1	01:07:02	Chulpan_(rye)	S._cereale_Chulpan	KH2PO4	2021-03-31 16:52:17	985587	0.17942	0	0	0.01014	0.98986	0	0	229.739	281.071	141.982	0	0.00932	0.93336	0.0568	0.00053	0	18.109	4290.02	0.106	1272.54	3.21679	175.722	0.47739	0	0	0.00356	0.50725	0.48919	0	-0.08676	6e-05	0.00046	0.86077	0.13866	5e-05	0	-0.07096	0.00017	0.00025	0.86086	0.13862	9e-05	0
1	01:07:03	Chulpan_(rye)	S._cereale_Chulpan	KH2PO4	2021-03-31 16:52:17	1078010	0.23375	0	0.00018	0.01741	0.97093	0.01148	0	253.721	322.368	134.412	0.00013	0.01513	0.94822	0.03519	0.00133	0	19.342	4248.81	0.105	1247.89	3.01893	161.311	0.54654	9e-05	9e-05	0.00444	0.33959	0.65579	0	-0.06757	5e-05	0.00131	0.79552	0.20212	0.001	0	-0.04366	9e-05	0.00203	0.79477	0.20255	0.00051	6e-05
1	01:08:01	LD222_Rht17_NIL	T._durum_LD222_Rht17_NIL	KH2PO4	2021-03-31 16:52:17	667817	0.21341	0	8e-05	0.05893	0.93588	0.00512	0	220.056	254.771	145.737	0	0.01029	0.81217	0.17674	0.00079	0	22.382	3034.76	0.075	1106.23	2.62598	140.218	0.57743	0	0	0.00512	0.23683	0.75805	0	-0.11995	0	0.01405	0.79798	0.18797	0	0	-0.09552	0	0.02214	0.78989	0.18797	0	0
1	01:08:02	LD222_Rht17_NIL	T._durum_LD222_Rht17_NIL	KH2PO4	2021-03-31 16:52:17	774101	0.19517	0	0	0.01359	0.98641	0	0	222.479	265.52	146.387	0.00014	0.00878	0.90748	0.0831	0.00051	0	21.953	3479.44	0.086	1216.54	2.67463	151.845	0.53124	0	0	0.00339	0.31231	0.6843	0	-0.11622	0	0	0.90204	0.09796	0	0	-0.08508	0	0	0.90204	0.09788	9e-05	0
1	01:08:03	LD222_Rht17_NIL	T._durum_LD222_Rht17_NIL	KH2PO4	2021-03-31 16:52:17	626733	0.23397	0	7e-05	0.0356	0.95777	0.00656	0	213.207	259.297	137.2	0.00048	0.00973	0.89822	0.08882	0.00274	0	28.913	2939.55	0.073	1355.99	2.06821	123.595	0.54644	0.00064	0	0.01697	0.25522	0.72717	0	-0.0701	0.00018	0.00065	0.76441	0.23442	0.00034	0	-0.05731	0.00044	0.00097	0.76383	0.23438	0.00038	0
1	01:09:01	LD222_(tall_wheat)	LD222_recurrent_parent_(tall)	KH2PO4	2021-03-31 16:52:17	729514	0.24205	0	0	0.01625	0.98028	0.00348	0	237.393	323.317	136.444	0	0.01092	0.92074	0.06787	0.00046	0	28.895	3073.02	0.076	1389.55	2.06939	154.992	0.59664	0	0	0.00181	0.17588	0.82231	0	-0.0769	0	0.00166	0.75556	0.24268	0.0001	0	-0.05119	0	0.00445	0.75276	0.24278	0	0
1	01:09:02	LD222_(tall_wheat)	LD222_recurrent_parent_(tall)	KH2PO4	2021-03-31 16:52:17	799684	0.19563	0	0	0.022	0.978	0	0	314.817	360.798	143.318	0.00022	0.01064	0.89573	0.09094	0.00247	0	17.483	2540.15	0.063	700.78	3.32829	236.719	0.52286	0	0	0.00755	0.37237	0.62008	0	-0.09719	0	0.00032	0.84793	0.15175	0	0	-0.07615	0.00028	0.00264	0.84532	0.15175	0	0
1	01:09:03	LD222_(tall_wheat)	LD222_recurrent_parent_(tall)	KH2PO4	2021-03-31 16:52:17	642774	0.26835	0.00045	0.00134	0.01917	0.96391	0.01514	0	280.145	332.923	128.96	0	0.01626	0.93916	0.04017	0.00441	0	24.089	2294.43	0.057	855.213	2.44987	202.336	0.55921	0	0	0.00897	0.27025	0.72078	0	-0.04322	0	0.00077	0.68273	0.31618	0.00032	0	-0.03075	0.00152	0.00132	0.68065	0.31606	0.00034	0.00011
2	01:01:01	Chulpan_(rye)	S._cereale_Chulpan	w/o_P	2021-03-31 17:29:39	133287	0.12896	0	0	0.03024	0.96976	0	0	163.805	216.223	152.524	0.00031	0.04445	0.82882	0.11907	0.00737	0	20.224	813.69	0.02	275.966	2.89252	94.972	0.44735	0	0	0.00624	0.62497	0.36879	0	-0.1031	0	0	0.86358	0.13642	0	0	-0.08583	0	0	0.86358	0.13642	0	0
2	01:01:02	Chulpan_(rye)	S._cereale_Chulpan	w/o_P	2021-03-31 17:29:39	154331	0.13085	0	0	0.02206	0.97794	0	0	185.805	197.573	151.505	0	0.0291	0.86925	0.1014	0.00024	0	14.723	830.608	0.02	199.658	3.93429	130.854	0.43368	0	0	0.00216	0.6101	0.38774	0	-0.09938	0	0	0.90259	0.09741	0	0	-0.08847	0.00081	0.0007	0.90107	0.09741	0	0
2	01:01:03	Chulpan_(rye)	S._cereale_Chulpan	w/o_P	2021-03-31 17:29:39	97961.1	0.10046	0	0	0.06296	0.93704	0	0	232.403	254.273	161.012	0	0.01458	0.76595	0.21608	0.00339	0	9.226	421.514	0.01	57.121	6.23526	144.753	0.37153	0	0	0.01144	0.85656	0.132	0	-0.10052	0	0	0.93025	0.069	0.00075	0	-0.10213	0	0.00117	0.92908	0.06807	0.00092	0.00075
2	01:02:01	LD222_Rht17_NIL	T._durum_LD222_Rht17_NIL	w/o_P	2021-03-31 17:29:39	318520	0.16136	0	0.00144	0.04893	0.94935	0.00028	0	257.067	281.778	155.149	0	0.01	0.78985	0.19922	0.00092	0	18.837	1239.06	0.031	356.441	3.09676	164.994	0.4935	0.0003	0	0.0077	0.44597	0.54603	0	-0.13145	0	0.00177	0.87931	0.11891	0	0	-0.11436	0.0013	0.00951	0.87028	0.11891	0	0
2	01:02:02	LD222_Rht17_NIL	T._durum_LD222_Rht17_NIL	w/o_P	2021-03-31 17:29:39	312961	0.13069	0	0	0.03905	0.96095	0	0	211.321	237.546	158.717	0.00013	0.00735	0.83394	0.15778	0.00081	0	20.225	1480.97	0.037	464.669	2.8924	139.513	0.43454	0	0	0.01077	0.63205	0.35718	0	-0.12891	0	0	0.9458	0.0542	0	0	-0.11655	0	0.00118	0.94461	0.05391	0	0.0003
2	01:02:03	LD222_Rht17_NIL	T._durum_LD222_Rht17_NIL	w/o_P	2021-03-31 17:29:39	297088	0.17783	0	0	0.03517	0.9642	0.00063	0	240.717	290.709	147.236	0.00024	0.0122	0.83092	0.15219	0.00444	0	16.653	1234.18	0.03	308.943	3.48897	145.792	0.49236	0	0	0.01588	0.45402	0.53009	0	-0.10376	0	0.00044	0.87337	0.12585	0.00034	0	-0.08541	0	0.00082	0.87299	0.12619	0	0
2	01:03:01	LD222_(tall_wheat)	LD222_recurrent_parent_(tall)	w/o_P	2021-03-31 17:29:39	288364	0.19455	0	0	0.01321	0.98603	0.00076	0	225.939	265.369	142.026	0	0.02217	0.89633	0.08151	0	0	26.086	1276.29	0.031	507.445	2.27405	127.589	0.51381	0	0	0.00183	0.36574	0.63244	0	-0.09183	0	0	0.81595	0.18405	0	0	-0.07022	0	0	0.81595	0.18382	0.00023	0
2	01:03:02	LD222_(tall_wheat)	LD222_recurrent_parent_(tall)	w/o_P	2021-03-31 17:29:39	437969	0.1601	0	0	0.04115	0.95885	0	0	266.47	306.398	144.16	0.00026	0.02755	0.84415	0.12248	0.00556	0	23.02	1643.59	0.041	560.26	2.55697	169.769	0.44333	0	0	0.00944	0.55881	0.43176	0	-0.07934	0	0	0.82067	0.17933	0	0	-0.0681	0	0.00018	0.82049	0.17933	0	0
2	01:03:03	LD222_(tall_wheat)	LD222_recurrent_parent_(tall)	w/o_P	2021-03-31 17:29:39	232668	0.20094	0	0	0.06001	0.93806	0.00194	0	206.844	264.2	135.566	0	0.02929	0.88033	0.08668	0.00369	0	33.98	1124.85	0.028	602.301	1.78913	96.414	0.52872	0	0.00053	0.01255	0.3555	0.63142	0	-0.06107	0	0.00029	0.76664	0.2297	0.00338	0	-0.04331	0	0.00055	0.76637	0.2315	0.00157	0
2	01:04:01	Chulpan_(rye)	S._cereale_Chulpan	Phosphorite	2021-03-31 17:29:39	473334	0.15367	0	0.00016	0.04328	0.95643	0.00013	0	202.995	243.211	152.385	0	0.01042	0.8258	0.16355	0.00022	0	13.029	2331.75	0.058	403.555	4.43492	155.089	0.51138	0	0	0.00087	0.38116	0.61796	0	-0.12023	0	0.00242	0.88815	0.10931	0.00013	0	-0.09993	0.00054	0.00771	0.88232	0.10944	0	0
2	01:04:02	Chulpan_(rye)	S._cereale_Chulpan	Phosphorite	2021-03-31 17:29:39	515416	0.16523	0	0	0.01835	0.98165	0	0	224.355	266.183	143.863	0.00039	0.01187	0.90696	0.07914	0.00164	0	15.128	2297.33	0.057	551.732	3.8311	169.742	0.46868	0	0	0.00321	0.45911	0.53768	0	-0.08029	0	0	0.85985	0.14015	0	0	-0.06872	0	0	0.85985	0.14015	0	0
2	01:04:03	Chulpan_(rye)	S._cereale_Chulpan	Phosphorite	2021-03-31 17:29:39	458661	0.13574	0	0	0.04206	0.95757	0.00038	0	215.645	258.523	152.322	0.00018	0.01253	0.83769	0.14669	0.00291	0	17.907	2126.93	0.052	559.673	3.25188	144.141	0.44107	0	0	0.01227	0.58205	0.40568	0	-0.09669	0	0	0.91174	0.08802	0.00024	0	-0.0832	0	0.0006	0.91114	0.08761	0.00064	0
2	01:05:01	LD222_Rht17_NIL	T._durum_LD222_Rht17_NIL	Phosphorite	2021-03-31 17:29:39	362352	0.13748	0	0.00019	0.11105	0.8877	0.00106	0	235.035	258.576	163.997	0	0.0053	0.68121	0.31096	0.00252	0	18.607	1541.69	0.038	435.015	3.13379	158.428	0.48325	0	0	0.00172	0.48322	0.51505	0	-0.15317	0	0.00271	0.91922	0.07787	0.0002	0	-0.14534	0	0.01932	0.90261	0.07807	0	0
2	01:05:02	LD222_Rht17_NIL	T._durum_LD222_Rht17_NIL	Phosphorite	2021-03-31 17:29:39	484937	0.17311	0	0	0.03352	0.96648	0	0	264.13	275.646	149.611	0	0.00819	0.87005	0.11845	0.00331	0	23.167	1835.98	0.045	686.505	2.5417	180.989	0.5016	0	0	0.00779	0.38647	0.60574	0	-0.12044	0	0.00029	0.93862	0.06109	0	0	-0.09571	0	0.00124	0.93767	0.06109	0	0
2	01:05:03	LD222_Rht17_NIL	T._durum_LD222_Rht17_NIL	Phosphorite	2021-03-31 17:29:39	347849	0.1786	0	0	0.03443	0.9635	0.00207	0	248.6	307.333	143.322	0.00041	0.02014	0.87779	0.09905	0.00262	0	18.919	1399.23	0.035	386.18	3.08396	159.44	0.48151	0	0	0.01387	0.50228	0.48386	0	-0.08685	0	0	0.8317	0.16809	0.00021	0	-0.06941	0.00029	0.00036	0.83105	0.1675	0.00064	0.00017
2	01:06:01	LD222_(tall_wheat)	LD222_recurrent_parent_(tall)	Phosphorite	2021-03-31 17:29:39	337521	0.17295	0	0.00061	0.03622	0.96153	0.00164	0	246.984	302.023	151.849	0.00021	0.01867	0.81748	0.16104	0.00259	0	14.888	1366.57	0.034	299.552	3.89152	143.828	0.51407	0	0.00024	0.00302	0.37959	0.61715	0	-0.12363	0	0.00082	0.86066	0.13852	0	0	-0.09465	0.00044	0.00026	0.86078	0.13828	0.00024	0
2	01:06:02	LD222_(tall_wheat)	LD222_recurrent_parent_(tall)	Phosphorite	2021-03-31 17:29:39	457789	0.16856	0	0.00011	0.02077	0.97898	0.00014	0	243.406	298.123	146.186	0.00013	0.01561	0.88506	0.09552	0.00368	0	20.082	1880.77	0.046	602.325	2.91203	138.29	0.49008	0	0	0.01152	0.46213	0.52634	0	-0.09677	0	0.00011	0.85948	0.14041	0	0	-0.0768	0.00011	0	0.85948	0.1401	0.00016	0.00015
2	01:06:03	LD222_(tall_wheat)	LD222_recurrent_parent_(tall)	Phosphorite	2021-03-31 17:29:39	292499	0.16535	0	0	0.04121	0.95522	0.00357	0	300.885	336.894	148.49	0	0.01805	0.80991	0.17076	0.00129	0	20.125	972.129	0.024	267.21	2.90606	199.468	0.4247	0	0.00062	0.02119	0.64185	0.33634	0	-0.08312	0	0	0.84479	0.1528	0.00241	0	-0.07614	0	0	0.84479	0.15091	0.00336	0.00094
2	01:07:01	Chulpan_(rye)	S._cereale_Chulpan	KH2PO4	2021-03-31 17:29:39	717665	0.16743	0	0.00014	0.03748	0.96195	0.00042	0	237.334	293.513	149.837	0	0.00738	0.81338	0.17741	0.00183	0	15.726	3023.86	0.075	695.358	3.68897	180.897	0.50091	0	0	0.00356	0.44303	0.55341	0	-0.10573	0	0.00066	0.86576	0.13358	0	0	-0.08604	0	0.00111	0.86531	0.13358	0	0
2	01:07:02	Chulpan_(rye)	S._cereale_Chulpan	KH2PO4	2021-03-31 17:29:39	813516	0.19019	0	0	0.00919	0.99065	0.00016	0	229.443	276.81	141.947	0	0.00542	0.95362	0.04038	0.00058	0	17.511	3545.61	0.087	985.508	3.32318	140.839	0.50038	0	0	0.00513	0.40629	0.58858	0	-0.09336	0	0.00089	0.9128	0.0862	0.0001	0	-0.06935	0	0.0003	0.91339	0.08612	0.00019	0
2	01:07:03	Chulpan_(rye)	S._cereale_Chulpan	KH2PO4	2021-03-31 17:29:39	1078770	0.22242	0	0	0.02054	0.9703	0.00916	0	253.224	323.659	134.475	0	0.01208	0.93875	0.04675	0.00242	0	19.659	4260.12	0.105	1258.42	2.97213	177.578	0.53678	0	7e-05	0.0098	0.32493	0.6652	0	-0.06635	0	0.00083	0.80824	0.19024	0.00068	0	-0.0471	9e-05	0.00479	0.8042	0.1905	0.00031	0.00011
2	01:08:01	LD222_Rht17_NIL	T._durum_LD222_Rht17_NIL	KH2PO4	2021-03-31 17:29:39	667118	0.19091	0.0002	0	0.06216	0.93678	0.00087	0	263.964	288.051	150.842	0	0.01108	0.79372	0.19436	0.00084	0	17.494	2527.31	0.062	679.704	3.32621	195.936	0.55947	0	0	0.00033	0.30674	0.69293	0	-0.13357	0.00019	0.00251	0.86014	0.13696	0.0002	0	-0.10294	0	0.00623	0.85662	0.13716	0	0
2	01:08:02	LD222_Rht17_NIL	T._durum_LD222_Rht17_NIL	KH2PO4	2021-03-31 17:29:39	561191	0.20801	0	0	0.01075	0.98925	0	0	249.01	293.382	140.74	0	0.00994	0.93018	0.05929	0.00059	0	20.154	2253.69	0.056	715.073	2.90204	187.055	0.54477	0	0	0.005	0.29151	0.70349	0	-0.0946	0	0	0.84773	0.15227	0	0	-0.06836	0	0.00016	0.84758	0.15227	0	0
2	01:08:03	LD222_Rht17_NIL	T._durum_LD222_Rht17_NIL	KH2PO4	2021-03-31 17:29:39	661185	0.28123	0	0	0.03473	0.9404	0.02486	0	210.842	263.975	129.616	0.00041	0.02044	0.9071	0.0711	0.00096	0	23.822	3135.93	0.077	1082.45	2.47569	134.061	0.59091	0	7e-05	0.01063	0.23318	0.75612	0	-0.04563	0	0.00156	0.68651	0.31034	0.00159	0	-0.03312	0	0.0039	0.68417	0.31108	0.00051	0.00034
2	01:09:01	LD222_(tall_wheat)	LD222_recurrent_parent_(tall)	KH2PO4	2021-03-31 17:29:39	872204	0.18298	0	0	0.02298	0.9766	0.00041	0	339.247	364.246	149.905	0.00011	0.01348	0.85867	0.12648	0.00126	0	22.544	2571	0.063	864.273	2.6081	251.597	0.54569	0	0	0.00391	0.25843	0.73766	0	-0.13166	0	0.00054	0.88992	0.10954	0	0	-0.09484	0	0.00031	0.89015	0.10936	0.00018	0
2	01:09:02	LD222_(tall_wheat)	LD222_recurrent_parent_(tall)	KH2PO4	2021-03-31 17:29:39	904925	0.19038	0	0	0.02577	0.97423	0	0	295.554	360.118	141.711	6e-05	0.01589	0.88959	0.0931	0.00136	0	18.71	3061.79	0.076	887.387	3.11705	207.729	0.48977	8e-05	0	0.01022	0.40995	0.57975	0	-0.08161	8e-05	8e-05	0.8479	0.15194	0	0	-0.0673	0.00036	0.00031	0.84747	0.15179	0	7e-05
2	01:09:03	LD222_(tall_wheat)	LD222_recurrent_parent_(tall)	KH2PO4	2021-03-31 17:29:39	670901	0.23898	0	0	0.02541	0.96784	0.00675	0	246.505	323.9	129.982	0	0.02657	0.91121	0.0608	0.00142	0	21.734	2721.66	0.067	878.843	2.70034	156.295	0.51449	0	0	0.0112	0.35014	0.63867	0	-0.03576	0	8e-05	0.68098	0.31713	0.00181	0	-0.03291	0.00017	0.00239	0.6785	0.31764	0.00131	0
1	02:01:01	Chulpan_(rye)	S._cereale_Chulpan	w/o_P	2021-03-31 17:49:43	108402	0.17967	0	0	0.03167	0.96833	0	0	166.587	218.41	127.007	0	0.05445	0.87524	0.0667	0.00362	0	15.852	650.725	0.016	143.93	3.66055	136.067	0.49665	0	0	0.00118	0.53145	0.46737	0	-0.0136	0	0	0.57523	0.42477	0	0	-0.01696	0	0.00089	0.57434	0.42477	0	0
1	02:01:02	Chulpan_(rye)	S._cereale_Chulpan	w/o_P	2021-03-31 17:49:43	270053	0.08979	0	0	0.09113	0.90887	0	0	231.485	264.956	161.831	0	0.01465	0.73515	0.24205	0.00814	0	15.746	1166.61	0.029	292.155	3.68453	164.629	0.39015	0	0	0.00696	0.7432	0.24983	0	-0.09239	0	0	0.90621	0.09379	0	0	-0.09307	0	0	0.90621	0.09379	0	0
1	02:01:03	Chulpan_(rye)	S._cereale_Chulpan	w/o_P	2021-03-31 17:49:43	80747.6	0.14293	0	0	0.03759	0.96241	0	0	170.906	204.68	149.767	0	0.00738	0.87736	0.11415	0.00111	0	9.5	472.467	0.012	55.533	6.05751	121.444	0.47231	0	0	0.00314	0.54178	0.45507	0	-0.09523	0	0.00093	0.91102	0.08805	0	0	-0.0678	0	0	0.91195	0.08479	0.00215	0.00111
1	02:02:01	LD222_Rht17_NIL	T._durum_LD222_Rht17_NIL	w/o_P	2021-03-31 17:49:43	235704	0.13285	0	0	0.08775	0.91225	0	0	241.718	270.793	162.353	0	0.0155	0.66218	0.32097	0.00135	0	23.408	975.12	0.024	360.962	2.51698	164.847	0.47795	0	0	0.00577	0.54941	0.44482	0	-0.14782	0	0	0.88851	0.11149	0	0	-0.13746	0	0.00665	0.88185	0.11094	0.00055	0
1	02:02:02	LD222_Rht17_NIL	T._durum_LD222_Rht17_NIL	w/o_P	2021-03-31 17:49:43	268087	0.14237	0	0	0.03736	0.96264	0	0	240.436	278.56	151.985	0	0.02332	0.84718	0.12813	0.00137	0	17.59	1115.01	0.028	309.961	3.30864	150.109	0.45015	0	0	0.00977	0.52188	0.46835	0	-0.10589	0	0	0.92723	0.07277	0	0	-0.08962	0	0	0.92723	0.07277	0	0
1	02:02:03	LD222_Rht17_NIL	T._durum_LD222_Rht17_NIL	w/o_P	2021-03-31 17:49:43	319252	0.17599	0	0	0.03415	0.96585	0	0	238.505	273.169	143.539	0	0.02501	0.87974	0.09147	0.00378	0	19.883	1338.55	0.033	389.48	2.93998	148.088	0.4998	0	0	0.01403	0.34265	0.64332	0	-0.09277	0	0	0.84839	0.15082	0.00079	0	-0.07034	0	0	0.84839	0.15082	0.00079	0
1	02:03:01	LD222_(tall_wheat)	LD222_recurrent_parent_(tall)	w/o_P	2021-03-31 17:49:43	236477	0.14415	0.00023	0	0.11912	0.87961	0.00103	0	212.345	225.821	153.276	0	0.04248	0.71055	0.23857	0.0084	0	27.21	1113.65	0.027	469.815	2.18686	113.828	0.50258	0.00023	0	0.01129	0.39977	0.58871	0	-0.10787	0	0.01736	0.79998	0.18238	0.00028	0	-0.09222	0	0.02636	0.79099	0.18209	0.00057	0
1	02:03:02	LD222_(tall_wheat)	LD222_recurrent_parent_(tall)	w/o_P	2021-03-31 17:49:43	493490	0.17164	0	0	0.02629	0.97371	0	0	296.422	317.567	146.212	0	0.00976	0.89705	0.09031	0.00288	0	24.047	1664.82	0.041	605.138	2.45387	171.637	0.45573	0	0	0.01398	0.4737	0.51232	0	-0.08945	0	0	0.8915	0.1085	0	0	-0.07681	0	0.00258	0.88892	0.1085	0	0
1	02:03:03	LD222_(tall_wheat)	LD222_recurrent_parent_(tall)	w/o_P	2021-03-31 17:49:43	310825	0.18081	0	0	0.02158	0.97778	0.00065	0	273.243	293.012	132.926	0	0.07093	0.84992	0.07558	0.00357	0	26.989	1137.54	0.028	483.165	2.20335	170.25	0.48258	0	0	0.00458	0.48051	0.51491	0	-0.03745	0	0	0.67971	0.31739	0.0029	0	-0.03509	0	0.00226	0.67744	0.31811	0.00218	0
1	02:04:01	Chulpan_(rye)	S._cereale_Chulpan	Phosphorite	2021-03-31 17:49:43	430261	0.13244	0	0	0.0717	0.9283	0	0	181.305	243.093	160.033	0	0.00675	0.70667	0.28433	0.00225	0	15.675	2373.14	0.059	591.833	3.70064	130.047	0.47449	0	0	0.00116	0.55064	0.44819	0	-0.12176	0	0.00019	0.89761	0.1022	0	0	-0.11028	0	0.00391	0.89389	0.1022	0	0
1	02:04:02	Chulpan_(rye)	S._cereale_Chulpan	Phosphorite	2021-03-31 17:49:43	662678	0.12799	0	0	0.02933	0.97067	0	0	227.169	327.228	159.564	0.0002	0.00332	0.82339	0.17133	0.00177	0	15.629	2917.11	0.072	707.154	3.71127	164.597	0.46281	0	0.00011	0.00787	0.59445	0.39757	0	-0.12476	0	0	0.95497	0.04503	0	0	-0.10167	0.00022	0.00021	0.95454	0.04482	0.00021	0
1	02:04:03	Chulpan_(rye)	S._cereale_Chulpan	Phosphorite	2021-03-31 17:49:43	212127	0.18147	0	0	0.02279	0.97559	0.00162	0	170.73	198.095	139.505	0.00086	0.01087	0.9282	0.05542	0.00464	0	24.747	1242.47	0.031	446.7	2.38864	117.905	0.52653	0	0	0.00839	0.37527	0.61634	0	-0.06861	0	0	0.82968	0.16953	0.0008	0	-0.04725	0.00032	0	0.82936	0.16953	0	0.0008
1	02:05:01	LD222_Rht17_NIL	T._durum_LD222_Rht17_NIL	Phosphorite	2021-03-31 17:49:43	397023	0.16023	0	0	0.05437	0.94523	0.00039	0	255.345	287.206	155.088	0	0.01189	0.75001	0.23618	0.00192	0	19.035	1554.85	0.038	467.795	3.06586	202.001	0.50858	0	0	0.00219	0.46548	0.53233	0	-0.12485	0	0.00119	0.87546	0.12335	0	0	-0.10458	0	0.0014	0.87525	0.12335	0	0
1	02:05:02	LD222_Rht17_NIL	T._durum_LD222_Rht17_NIL	Phosphorite	2021-03-31 17:49:43	562957	0.14797	0	0	0.02906	0.97085	9e-05	0	276.823	312.393	156.119	0.0001	0.00391	0.86457	0.12995	0.00147	0	15.432	2033.64	0.05	499.758	3.75766	164.814	0.45531	0	0	0.00682	0.49197	0.50121	0	-0.13004	9e-05	0	0.95554	0.04437	0	0	-0.11364	0	0.00015	0.95548	0.04437	0	0
1	02:05:03	LD222_Rht17_NIL	T._durum_LD222_Rht17_NIL	Phosphorite	2021-03-31 17:49:43	322434	0.20109	0	0	0.02302	0.97393	0.00305	0	242.396	284.612	142.271	0.00043	0.00855	0.92688	0.06092	0.00321	0	14.125	1330.19	0.033	273.451	4.09703	158.621	0.54536	0	0	0.00807	0.29313	0.6988	0	-0.09828	0	0.00044	0.8982	0.10061	0.00074	0	-0.0622	0	0.00015	0.89849	0.1002	0.00115	0
1	02:06:01	LD222_(tall_wheat)	LD222_recurrent_parent_(tall)	Phosphorite	2021-03-31 17:49:43	374686	0.14847	0	0	0.06718	0.93282	0	0	300.863	343.853	157.822	0	0.01332	0.69745	0.28739	0.00184	0	15.778	1245.37	0.031	299.649	3.67727	176.524	0.48982	0	0	0.00332	0.56578	0.4309	0	-0.12879	0	0.00181	0.8734	0.12479	0	0	-0.11552	0	0.00288	0.87233	0.12479	0	0
1	02:06:02	LD222_(tall_wheat)	LD222_recurrent_parent_(tall)	Phosphorite	2021-03-31 17:49:43	534816	0.17486	0	0.00015	0.022	0.97785	0	0	261.139	311.494	139.932	0	0.0324	0.89019	0.07598	0.00143	0	23.231	2048.01	0.051	711.203	2.53501	135.219	0.45058	0.00012	0	0.02067	0.47113	0.50809	0	-0.07029	0.00015	0.00023	0.81022	0.18927	0.00013	0	-0.06172	0.00011	0.00039	0.81009	0.1884	0.00074	0.00026
1	02:06:03	LD222_(tall_wheat)	LD222_recurrent_parent_(tall)	Phosphorite	2021-03-31 17:49:43	373251	0.17546	0	0	0.03755	0.96083	0.00162	0	279.634	297.025	145.276	0	0.01959	0.85629	0.12307	0.00105	0	20.487	1334.79	0.033	409.097	2.85693	177.699	0.48687	0	0	0.01447	0.48864	0.49689	0	-0.08429	0	0.0007	0.81685	0.18126	0.00119	0	-0.07196	0.00074	0.00217	0.81464	0.18109	0.00084	0.00052
1	02:07:01	Chulpan_(rye)	S._cereale_Chulpan	KH2PO4	2021-03-31 17:49:43	637076	0.21268	0	0	0.03342	0.966	0.00058	0	168.034	237.028	136.647	0	0.00718	0.88516	0.10678	0.00088	0	17.785	3791.34	0.094	999.486	3.27356	117.149	0.56202	0	0	0.00071	0.2667	0.7326	0	-0.06394	0	0.00077	0.72791	0.27132	0	0	-0.05473	0.00032	0.00506	0.72331	0.27132	0	0
1	02:07:02	Chulpan_(rye)	S._cereale_Chulpan	KH2PO4	2021-03-31 17:49:43	680080	0.14308	0	0	0.02644	0.97356	0	0	236.278	312.728	151.091	0	0.00806	0.85465	0.13666	0.00064	0	14.267	2878.31	0.071	658.986	4.05722	169.932	0.46445	0	0	0.0048	0.54609	0.4491	0	-0.09978	0	0	0.92434	0.07566	0	0	-0.08378	0	0	0.92434	0.07566	0	0
1	02:07:03	Chulpan_(rye)	S._cereale_Chulpan	KH2PO4	2021-03-31 17:49:43	832635	0.21545	0	7e-05	0.01564	0.98153	0.00276	0	234.009	275.297	132.494	0	0.02549	0.92453	0.0488	0.00118	0	27.207	3558.14	0.088	1385.57	2.18704	145.678	0.53455	0	0	0.00799	0.344	0.64801	0	-0.05046	0.0001	0.00043	0.74396	0.25435	0.00116	0	-0.0355	0	0.00116	0.74333	0.25479	0.00072	0
1	02:08:01	LD222_Rht17_NIL	T._durum_LD222_Rht17_NIL	KH2PO4	2021-03-31 17:49:43	664089	0.20011	0	0	0.0214	0.97711	0.00149	0	237.481	315.639	144.085	0	0.01373	0.87457	0.11115	0.00055	0	16.537	2796.39	0.069	716.007	3.51289	152.618	0.55435	0	0	0.0037	0.26689	0.72942	0	-0.10685	0	0	0.85888	0.1406	0.00053	0	-0.07521	0	0.0005	0.85838	0.14067	0.00045	0
1	02:08:02	LD222_Rht17_NIL	T._durum_LD222_Rht17_NIL	KH2PO4	2021-03-31 17:49:43	750047	0.18343	0	0	0.02273	0.97656	0.00071	0	257.761	270.826	146.148	5e-05	0.0126	0.881	0.10462	0.00173	0	18.509	2909.85	0.072	858.592	3.14975	152.88	0.50463	0	0	0.00644	0.42868	0.56487	0	-0.10421	0	0.00011	0.86486	0.13503	0	0	-0.08414	0	0.00031	0.86466	0.13447	0.00047	9e-05
1	02:08:03	LD222_Rht17_NIL	T._durum_LD222_Rht17_NIL	KH2PO4	2021-03-31 17:49:43	532675	0.21604	0	0	0.0161	0.98233	0.00157	0	228.168	311.601	139.846	0	0.01325	0.93354	0.05178	0.00143	0	18.978	2334.58	0.058	673.45	3.07473	134.866	0.53557	0	0	0.01107	0.29714	0.69179	0	-0.09438	0	0	0.86358	0.13611	0.0003	0	-0.06493	0	0.00048	0.8631	0.13587	0.00055	0
1	02:09:01	LD222_(tall_wheat)	LD222_recurrent_parent_(tall)	KH2PO4	2021-03-31 17:49:43	798970	0.22832	0	0.00014	0.01323	0.98496	0.00167	0	301.481	312.503	141.277	9e-05	0.0097	0.9196	0.06941	0.00121	0	23.157	2650.15	0.065	939.265	2.54267	163.435	0.58558	0	0	0.00045	0.20801	0.79154	0	-0.1096	0	0.00098	0.85467	0.14435	0	0	-0.07375	0	0.00039	0.85526	0.14435	0	0
1	02:09:02	LD222_(tall_wheat)	LD222_recurrent_parent_(tall)	KH2PO4	2021-03-31 17:49:43	1218200	0.2116	0	0	0.01607	0.98393	0	0	306.995	352.086	139.268	0	0.01883	0.93325	0.04597	0.00195	0	24.229	3968.16	0.098	1521.02	2.43651	169.405	0.5237	0	0	0.00727	0.34106	0.65168	0	-0.092	0	0.00035	0.87385	0.1258	0	0	-0.06525	0	0.00116	0.87304	0.1258	0	0
1	02:09:03	LD222_(tall_wheat)	LD222_recurrent_parent_(tall)	KH2PO4	2021-03-31 17:49:43	735359	0.24921	0	0.00026	0.01433	0.98147	0.00394	0	262.825	267.999	128.034	0	0.02369	0.94676	0.02739	0.00216	0	27.636	2797.9	0.069	1197.31	2.15569	197.492	0.55225	0	0	0.00934	0.26596	0.7247	0	-0.03019	0	0	0.67325	0.32479	0.00196	0	-0.01984	0	0.00018	0.67307	0.32632	0.00043	0
2	02:01:01	Chulpan_(rye)	S._cereale_Chulpan	w/o_P	2021-03-31 17:58:00	114820	0.13024	0	0.00489	0.12963	0.86474	0.00074	0	195.444	216.795	147.763	0	0.04161	0.7053	0.25088	0.00221	0	20.232	587.48	0.014	186.446	2.89136	140.032	0.43335	0	0	0.01404	0.62305	0.36291	0	-0.08839	0	0.01478	0.73116	0.25406	0	0	-0.10763	0.00083	0.05583	0.68928	0.25261	0.00145	0
2	02:01:02	Chulpan_(rye)	S._cereale_Chulpan	w/o_P	2021-03-31 17:58:00	180160	0.09229	0	0.00114	0.09607	0.90278	0	0	218.305	251.782	163.918	0.00043	0.00947	0.71311	0.27371	0.00329	0	16.475	825.267	0.02	230.658	3.52558	137.175	0.42942	0	0	0.00536	0.61514	0.3795	0	-0.103	0	0.00204	0.93557	0.0624	0	0	-0.09057	0.00068	0.00208	0.93485	0.06206	0.00033	0
2	02:01:03	Chulpan_(rye)	S._cereale_Chulpan	w/o_P	2021-03-31 17:58:00	67134.5	0.10363	0	0	0.04199	0.95801	0	0	169.74	187.367	161.093	0	0.00588	0.77534	0.21878	0	0	9.15	395.513	0.01	41.898	6.28717	93.647	0.38588	0	0	0	0.92611	0.07389	0	-0.11332	0	0	0.94091	0.05909	0	0	-0.11005	0	0	0.94091	0.05909	0	0
2	02:02:01	LD222_Rht17_NIL	T._durum_LD222_Rht17_NIL	w/o_P	2021-03-31 17:58:00	164082	0.10668	0	0	0.08062	0.91938	0	0	257.436	277.281	169.03	0	0.01253	0.6777	0.30748	0.00228	0	21.229	637.371	0.016	224.932	2.76145	170.284	0.44497	0	0	0.00606	0.57158	0.42236	0	-0.15938	0	0	0.93936	0.06064	0	0	-0.14973	0	0.00644	0.93292	0.06064	0	0
2	02:02:02	LD222_Rht17_NIL	T._durum_LD222_Rht17_NIL	w/o_P	2021-03-31 17:58:00	313233	0.15538	0	0	0.02418	0.97582	0	0	231.726	283.321	148.762	0	0.0144	0.85424	0.12941	0.00195	0	17.317	1351.74	0.033	371.874	3.35916	154.188	0.4827	0	0	0.00182	0.48107	0.51712	0	-0.107	0	0	0.91068	0.08932	0	0	-0.09373	0	0.00259	0.90809	0.08915	0.00017	0
2	02:02:03	LD222_Rht17_NIL	T._durum_LD222_Rht17_NIL	w/o_P	2021-03-31 17:58:00	270322	0.19273	0	0	0.02808	0.97122	0.0007	0	254.066	277.355	141.086	0	0.02407	0.85767	0.11553	0.00272	0	20.923	1063.98	0.026	351.773	2.79998	167.035	0.50442	0	0	0.00794	0.44692	0.54514	0	-0.08643	0	0.00032	0.83701	0.16212	0.00055	0	-0.0638	0	0.00043	0.8369	0.16158	0.00109	0
2	02:03:01	LD222_(tall_wheat)	LD222_recurrent_parent_(tall)	w/o_P	2021-03-31 17:58:00	211199	0.13986	0	0.00063	0.05642	0.94295	0	0	214.567	225.379	149.12	0	0.04148	0.78398	0.167	0.00755	0	25.969	984.303	0.024	414.443	2.28357	111.655	0.47262	0	0	0.0019	0.53987	0.45823	0	-0.10283	0	0	0.82881	0.17119	0	0	-0.08248	0	0.00111	0.82771	0.17119	0	0
2	02:03:02	LD222_(tall_wheat)	LD222_recurrent_parent_(tall)	w/o_P	2021-03-31 17:58:00	404111	0.17747	0	0	0.01021	0.98979	0	0	274.846	326.933	143.532	0	0.0251	0.9194	0.05445	0.00104	0	22.474	1470.32	0.036	498.993	2.61574	145.571	0.50854	0	0	0.00324	0.38272	0.61404	0	-0.09894	0	0	0.86179	0.13821	0	0	-0.07155	0	0	0.86179	0.13771	0.0005	0
2	02:03:03	LD222_(tall_wheat)	LD222_recurrent_parent_(tall)	w/o_P	2021-03-31 17:58:00	320044	0.19587	0	0	0.02207	0.97734	0.00059	0	269.715	296.937	129.609	0	0.08475	0.85058	0.06226	0.0024	0	26.43	1186.6	0.029	479.904	2.24649	167.417	0.46463	0	0	0.02015	0.50534	0.47452	0	-0.0255	0	0	0.65698	0.34282	0.0002	0	-0.01862	0	0	0.65698	0.3398	0.00282	0.00041
2	02:04:01	Chulpan_(rye)	S._cereale_Chulpan	Phosphorite	2021-03-31 17:58:00	392843	0.15375	9e-05	0.00036	0.04149	0.95806	0	0	171.637	242.166	154.262	0	0.00747	0.81617	0.17468	0.00168	0	18.892	2288.8	0.056	675.351	3.08808	129.467	0.51692	0	0	0.00111	0.43101	0.56789	0	-0.12306	0	0.00031	0.8981	0.10159	0	0	-0.09392	0.00036	0.00083	0.89722	0.10159	0	0
2	02:04:02	Chulpan_(rye)	S._cereale_Chulpan	Phosphorite	2021-03-31 17:58:00	542990	0.14805	0	0	0.02028	0.97972	0	0	225.409	284	151.98	0.00012	0.00902	0.89518	0.09538	0.0003	0	15.749	2408.91	0.059	612.669	3.68381	150.752	0.48417	0	0.00019	0.00606	0.43782	0.55593	0	-0.11658	0	0	0.95305	0.04695	0	0	-0.08917	0.00031	0.00018	0.95255	0.04677	0.00018	0
2	02:04:03	Chulpan_(rye)	S._cereale_Chulpan	Phosphorite	2021-03-31 17:58:00	246199	0.16575	0	0	0.02987	0.97013	0	0	165.558	208.761	144.717	0.00028	0.02254	0.88634	0.08741	0.00343	0	19.958	1487.09	0.037	462.613	2.92936	107.434	0.48527	0	0	0.0123	0.5028	0.4849	0	-0.08515	0	0.00029	0.84399	0.15572	0	0	-0.06501	0	0	0.84428	0.15541	0.00031	0
2	02:05:01	LD222_Rht17_NIL	T._durum_LD222_Rht17_NIL	Phosphorite	2021-03-31 17:58:00	279838	0.12209	0	0.00024	0.0602	0.93956	0	0	240.997	283.657	163.948	0.00043	0.00598	0.72675	0.25631	0.01052	0	17.194	1161.17	0.029	317.408	3.38237	176.421	0.46677	0	0	0.00347	0.53501	0.46152	0	-0.14346	0	0	0.94858	0.05142	0	0	-0.12375	0	0.00236	0.94622	0.05118	0.00023	0
2	02:05:02	LD222_Rht17_NIL	T._durum_LD222_Rht17_NIL	Phosphorite	2021-03-31 17:58:00	484117	0.1505	0	0	0.02834	0.97166	0	0	254.622	313.302	157.363	0.00017	0.0067	0.79753	0.19352	0.00208	0	15.315	1901.32	0.047	471.14	3.78561	170.541	0.47791	0	0	0.00568	0.49907	0.49526	0	-0.13828	0	0	0.95377	0.04623	0	0	-0.11755	0.00027	0.00125	0.95225	0.04591	0.00032	0
2	02:05:03	LD222_Rht17_NIL	T._durum_LD222_Rht17_NIL	Phosphorite	2021-03-31 17:58:00	317576	0.18988	0	0	0.03276	0.96632	0.00092	0	251.489	288.227	147.306	0	0.0176	0.85834	0.12238	0.00168	0	13.729	1262.78	0.031	245.923	4.21284	154.802	0.52935	0	0	0.00789	0.3614	0.63071	0	-0.1144	0	0	0.89871	0.10104	0.00024	0	-0.08076	0	0.00051	0.8982	0.10009	0.0012	0
2	02:06:01	LD222_(tall_wheat)	LD222_recurrent_parent_(tall)	Phosphorite	2021-03-31 17:58:00	408192	0.13468	0	0	0.07474	0.92526	0	0	309.241	341.811	158.379	0.00018	0.02116	0.71666	0.25386	0.00815	0	14.154	1319.98	0.033	280.561	4.08872	186.298	0.44264	0	0	0.0144	0.53226	0.45334	0	-0.12026	0	0	0.88959	0.11041	0	0	-0.10819	0	0.00104	0.88855	0.11041	0	0
2	02:06:02	LD222_(tall_wheat)	LD222_recurrent_parent_(tall)	Phosphorite	2021-03-31 17:58:00	472616	0.17881	0	0.0006	0.01645	0.98295	0	0	244.35	291.587	141.565	0	0.02662	0.89484	0.07854	0	0	26.443	1934.18	0.048	793.499	2.24547	132.179	0.48664	0	0	0.0038	0.47954	0.51667	0	-0.08905	0	0.00213	0.80602	0.19185	0	0	-0.07386	0.00051	0.00499	0.80265	0.1914	0.00046	0
2	02:06:03	LD222_(tall_wheat)	LD222_recurrent_parent_(tall)	Phosphorite	2021-03-31 17:58:00	425590	0.18629	0	0	0.05714	0.94021	0.00265	0	284.02	342.303	144.559	0	0.03334	0.81718	0.14839	0.00109	0	20.175	1498.45	0.037	431.104	2.89917	171.395	0.51149	0.00025	0	0.00866	0.41424	0.57685	0	-0.09675	0	0.0007	0.81215	0.18545	0.0017	0	-0.07479	0	0.00308	0.81002	0.18487	0.0017	0.00033
2	02:07:01	Chulpan_(rye)	S._cereale_Chulpan	KH2PO4	2021-03-31 17:58:00	632836	0.14086	0	0.00023	0.06156	0.93699	0.00122	0	175.784	244.267	153.965	0	0.00726	0.80737	0.18308	0.00229	0	17.16	3600.07	0.089	947.892	3.38904	121.745	0.48947	0	0	0.00496	0.46802	0.52703	0	-0.11513	0	0.00345	0.89092	0.10522	0.00041	0	-0.10161	0	0.01545	0.87893	0.10563	0	0
2	02:07:02	Chulpan_(rye)	S._cereale_Chulpan	KH2PO4	2021-03-31 17:58:00	827768	0.1475	0	7e-05	0.02655	0.97339	0	0	249.575	315.363	151.159	0.00013	0.00662	0.83775	0.15436	0.00114	0	14.945	3316.71	0.082	805.274	3.87693	145.48	0.47947	0	0	0.00482	0.47276	0.52243	0	-0.09842	0	9e-05	0.91046	0.08945	0	0	-0.08313	0	0.00013	0.91042	0.08945	0	0
2	02:07:03	Chulpan_(rye)	S._cereale_Chulpan	KH2PO4	2021-03-31 17:58:00	928015	0.22498	0	0.00013	0.01789	0.98045	0.00153	0	236.501	276.661	129.41	0	0.02564	0.93279	0.03895	0.00263	0	23.645	3923.94	0.097	1337.08	2.49317	166.869	0.5359	0	7e-05	0.01176	0.31934	0.66884	0	-0.03474	0	0.0008	0.68954	0.30871	0.00096	0	-0.02246	7e-05	0.00054	0.68973	0.30853	0.00107	7e-05
2	02:08:01	LD222_Rht17_NIL	T._durum_LD222_Rht17_NIL	KH2PO4	2021-03-31 17:58:00	626398	0.17949	0	0	0.06626	0.93154	0.0022	0	233.406	271.507	149.855	0	0.01086	0.81402	0.1729	0.00221	0	17.52	2683.72	0.066	747.251	3.32151	175.124	0.53616	0	0	0.00469	0.3091	0.68621	0	-0.12009	0	0.0043	0.8408	0.15446	0.00044	0	-0.0965	0.00026	0.00977	0.83507	0.15464	0.00026	0
2	02:08:02	LD222_Rht17_NIL	T._durum_LD222_Rht17_NIL	KH2PO4	2021-03-31 17:58:00	644224	0.17324	0	8e-05	0.03229	0.96711	0.00052	0	251.542	268.885	148.863	0	0.00996	0.87367	0.11502	0.00135	0	18.282	2561.1	0.063	713.367	3.18754	164.694	0.49239	0	0.00032	0.00948	0.41495	0.57526	0	-0.11623	0	0.00062	0.88785	0.11145	8e-05	0	-0.08984	0	0.00098	0.88749	0.11036	0.00064	0.00053
2	02:08:03	LD222_Rht17_NIL	T._durum_LD222_Rht17_NIL	KH2PO4	2021-03-31 17:58:00	682533	0.2352	0	0	0.02469	0.96647	0.00885	0	243.616	311.569	136.392	0	0.01762	0.91386	0.06539	0.00313	0	19.704	2801.68	0.069	841.41	2.96563	166.077	0.54363	0	0	0.01066	0.29863	0.6907	0	-0.0787	0	0.00171	0.77645	0.22092	0.00092	0	-0.05642	0	0.00238	0.77578	0.22164	0.0001	0.0001
2	02:09:01	LD222_(tall_wheat)	LD222_recurrent_parent_(tall)	KH2PO4	2021-03-31 17:58:00	818149	0.21619	0	0	0.02623	0.97239	0.00138	0	304.421	332.91	141.965	7e-05	0.00984	0.8657	0.12275	0.00164	0	21.91	2687.56	0.066	910.243	2.67962	188.004	0.54626	0	0	0.00473	0.30528	0.68999	0	-0.09612	0	0.0012	0.81354	0.18526	0	0	-0.07453	0	0.0006	0.81414	0.1852	6e-05	0
2	02:09:02	LD222_(tall_wheat)	LD222_recurrent_parent_(tall)	KH2PO4	2021-03-31 17:58:00	1010270	0.22611	0	0	0.01577	0.98408	0.00015	0	309.601	352.606	135.737	0	0.01205	0.93289	0.05373	0.00133	0	24.702	3263.14	0.081	1212.65	2.39272	196.666	0.52436	0	0	0.00781	0.34627	0.64593	0	-0.06265	0	0	0.78547	0.21414	0.00039	0	-0.05328	0	0	0.78547	0.21392	0.00061	0
2	02:09:03	LD222_(tall_wheat)	LD222_recurrent_parent_(tall)	KH2PO4	2021-03-31 17:58:00	766834	0.27699	0	0	0.0115	0.96051	0.02799	0	259.816	271.996	127.204	0	0.02455	0.94358	0.03121	0.00066	0	28.782	2951.45	0.073	1283.3	2.07684	180.843	0.5882	0	0	0.00522	0.22646	0.76833	0	-0.034	0.0005	0.00172	0.64046	0.35442	0.0029	0	-0.02163	0	0.00087	0.64181	0.35671	0.00061	0
1	01:01:01	Chulpan_(rye)	S._cereale_Chulpan	w/o_P	2021-04-02 16:50:36	289573	0.09296	0	0	0.06519	0.93481	0	0	187.414	220.705	168.073	0	0.0234	0.67682	0.29489	0.00489	0	18.205	1545.1	0.038	396.479	3.20049	123.192	0.40583	0	0	0.00476	0.79506	0.20018	0	-0.13332	0	0	0.92797	0.07203	0	0	-0.12802	0	0	0.92797	0.07203	0	0
1	01:01:02	Chulpan_(rye)	S._cereale_Chulpan	w/o_P	2021-04-02 16:50:36	207407	0.1021	0	0	0.05904	0.94096	0	0	171.418	220.704	157.741	0	0.03513	0.72446	0.23804	0.00237	0	15.936	1209.94	0.03	293.28	3.64161	121.423	0.35871	0	0	0.01539	0.81528	0.16933	0	-0.07447	0	0	0.84352	0.15648	0	0	-0.08655	0	0.00237	0.84116	0.15568	0.0008	0
1	01:01:03	Chulpan_(rye)	S._cereale_Chulpan	w/o_P	2021-04-02 16:50:36	80593.2	0.13282	0	0	0.0372	0.9628	0	0	224.394	257.521	149.174	0	0.03392	0.81022	0.15423	0.00164	0	14.781	359.159	0.009	83.748	3.91914	145.211	0.42783	0	0	0.00881	0.74115	0.25004	0	-0.07729	0	0	0.83802	0.16198	0	0	-0.07301	0	0	0.83802	0.16198	0	0
1	01:02:01	LD222_Rht17_NIL	T._durum_LD222_Rht17_NIL	w/o_P	2021-04-02 16:50:36	277123	0.16483	0	0.00017	0.04477	0.95506	0	0	241.608	278.689	149.528	0.00055	0.01827	0.81942	0.15859	0.00316	0	17.993	1146.99	0.028	309.011	3.23684	138.574	0.50379	0	0	0.00445	0.43135	0.5642	0	-0.10632	0	0	0.87377	0.12623	0	0	-0.08593	0	0.00034	0.87344	0.1258	0.00043	0
1	01:02:02	LD222_Rht17_NIL	T._durum_LD222_Rht17_NIL	w/o_P	2021-04-02 16:50:36	343672	0.14255	0.00015	0.0002	0.02349	0.97616	0	0	236.924	268.091	152.071	0	0.01457	0.85292	0.13142	0.00108	0	23.807	1450.56	0.036	557.7	2.47719	132.099	0.42619	0	0	0.01272	0.62651	0.36077	0	-0.10502	0	0.00017	0.89347	0.10636	0	0	-0.1024	0.00049	0.00113	0.89202	0.10636	0	0
1	01:02:03	LD222_Rht17_NIL	T._durum_LD222_Rht17_NIL	w/o_P	2021-04-02 16:50:36	193224	0.18209	0	0	0.01242	0.98758	0	0	248.289	280.244	142.212	0	0.02371	0.90488	0.07141	0	0	19.42	778.221	0.019	217.629	3.00723	129.073	0.52167	0	0	0.00224	0.31994	0.67783	0	-0.09594	0	0	0.87175	0.12825	0	0	-0.06775	0	0	0.87175	0.12825	0	0
1	01:03:01	LD222_(tall_wheat)	LD222_recurrent_parent_(tall)	w/o_P	2021-04-02 16:50:36	277403	0.23263	0	0.00033	0.01918	0.97803	0.00246	0	279.21	298.831	130.969	0	0.04162	0.90898	0.04833	0.00108	0	24.618	993.53	0.025	389.926	2.40043	203.993	0.55682	0	0	0.00094	0.29294	0.70612	0	-0.05594	0	0.00096	0.69863	0.30011	0.0003	0	-0.02997	0	0.00062	0.69896	0.30041	0	0
1	01:03:02	LD222_(tall_wheat)	LD222_recurrent_parent_(tall)	w/o_P	2021-04-02 16:50:36	493883	0.19092	0	0	0.02158	0.97842	0	0	299.289	356.737	135.571	0.00027	0.03189	0.91741	0.04701	0.00341	0	24.466	1650.19	0.041	622.812	2.41439	196.129	0.50587	0	0	0.01242	0.34606	0.64152	0	-0.06411	0	0	0.78655	0.21345	0	0	-0.04435	0	0	0.78655	0.21295	0.00051	0
1	01:03:03	LD222_(tall_wheat)	LD222_recurrent_parent_(tall)	w/o_P	2021-04-02 16:50:36	327453	0.21677	0	0	0.02573	0.97284	0.00144	0	233.917	295.433	131.693	0.0004	0.03829	0.90756	0.04828	0.00548	0	29.003	1399.87	0.035	647.419	2.06237	128.435	0.53686	0	0	0.01232	0.30381	0.68388	0	-0.04797	0	0.00065	0.75096	0.24747	0.00092	0	-0.03192	0	0.00021	0.7514	0.24714	0.00125	0
1	01:04:01	Chulpan_(rye)	S._cereale_Chulpan	Phosphorite	2021-04-02 16:50:36	496878	0.12257	0	0	0.05151	0.94821	0.00028	0	212.62	257.208	163.615	0	0.005	0.73215	0.26123	0.00163	0	15.545	2336.93	0.058	558.389	3.73095	144.526	0.45158	0	0	0.00256	0.60415	0.39329	0	-0.13777	0	0.00221	0.93952	0.05828	0	0	-0.12521	0	0.00174	0.93999	0.05828	0	0
1	01:04:02	Chulpan_(rye)	S._cereale_Chulpan	Phosphorite	2021-04-02 16:50:36	632497	0.13691	0	0	0.03574	0.96426	0	0	233.535	285.918	151.132	0.00054	0.00877	0.85749	0.1307	0.0025	0	14.149	2708.36	0.067	611.92	4.09027	160.492	0.4423	0	0	0.00493	0.54427	0.4508	0	-0.0962	0	0	0.93024	0.06976	0	0	-0.08429	0	0.00024	0.93	0.06976	0	0
1	01:04:03	Chulpan_(rye)	S._cereale_Chulpan	Phosphorite	2021-04-02 16:50:36	523092	0.11727	0	0	0.05336	0.94637	0.00027	0	213.911	257.62	159.947	0	0.01113	0.77177	0.21582	0.00127	0	18.799	2445.38	0.06	672.881	3.10284	136.32	0.4326	0	0	0.00779	0.62944	0.36277	0	-0.11201	0	0.00038	0.93719	0.0619	0.00053	0	-0.09965	0	0.0009	0.93667	0.06205	0.00023	0.00015
1	01:05:01	LD222_Rht17_NIL	T._durum_LD222_Rht17_NIL	Phosphorite	2021-04-02 16:50:36	513098	0.15867	0	0.00017	0.0551	0.94416	0.00057	0	242.029	281.478	154.772	0	0.01017	0.80177	0.18588	0.00218	0	18.793	2119.99	0.052	580.383	3.10377	166.039	0.49414	0	0	0.00447	0.42276	0.57278	0	-0.12187	0	0.00055	0.89547	0.10398	0	0	-0.10203	0.00019	0.00285	0.89299	0.10398	0	0
1	01:05:02	LD222_Rht17_NIL	T._durum_LD222_Rht17_NIL	Phosphorite	2021-04-02 16:50:36	562456	0.14709	0	0.00018	0.02354	0.97629	0	0	293.968	311.371	157.115	0.00019	0.01467	0.83994	0.14087	0.00432	0	18.969	1913.32	0.047	574.032	3.07609	207.125	0.47796	0	0	0.00906	0.45853	0.53241	0	-0.14175	0	0	0.93253	0.06747	0	0	-0.11694	0.00042	0.00189	0.93022	0.06747	0	0
1	01:05:03	LD222_Rht17_NIL	T._durum_LD222_Rht17_NIL	Phosphorite	2021-04-02 16:50:36	429801	0.16682	0	0	0.04096	0.95819	0.00085	0	258.418	294.593	145.772	0	0.01937	0.86733	0.10899	0.00431	0	21.228	1663.2	0.041	549.842	2.76154	158.601	0.49136	0	0	0.01159	0.4794	0.50901	0	-0.0902	0	0	0.86698	0.13243	0.00059	0	-0.072	0.00023	0.00058	0.86616	0.13276	0.00027	0
1	01:06:01	LD222_(tall_wheat)	LD222_recurrent_parent_(tall)	Phosphorite	2021-04-02 16:50:36	371421	0.18163	0	0	0.03139	0.96861	0	0	277.831	341.046	144.707	0	0.0238	0.881	0.09291	0.0023	0	12.353	1336.86	0.033	240.086	4.67365	197.111	0.54197	0	0	0.00061	0.34237	0.65703	0	-0.10059	0	0.00042	0.8405	0.15908	0	0	-0.06548	0	0.00163	0.83928	0.15884	0.00024	0
1	01:06:02	LD222_(tall_wheat)	LD222_recurrent_parent_(tall)	Phosphorite	2021-04-02 16:50:36	736417	0.16587	0	0	0.01749	0.98251	0	0	291.999	347.589	147.149	7e-05	0.01368	0.89372	0.09029	0.00223	0	20.035	2521.98	0.062	781.828	2.91865	199.379	0.48033	0	0	0.01099	0.46215	0.52686	0	-0.09608	0	0.00033	0.88728	0.11239	0	0	-0.0816	0.0001	0.00099	0.88652	0.11239	0	0
1	01:06:03	LD222_(tall_wheat)	LD222_recurrent_parent_(tall)	Phosphorite	2021-04-02 16:50:36	331736	0.14853	0	0.00058	0.05045	0.94898	0	0	306.161	342.67	150.095	0	0.0165	0.82621	0.14984	0.00745	0	19.564	1083.54	0.027	305.512	2.98606	184.229	0.41138	0	0	0.03121	0.6818	0.287	0	-0.08569	0	0	0.84794	0.15156	0.0005	0	-0.07664	0	0	0.84794	0.15206	0	0
1	01:07:01	Chulpan_(rye)	S._cereale_Chulpan	KH2PO4	2021-04-02 16:50:36	1072410	0.15352	0.00011	0.00035	0.03636	0.96294	0.00024	0	243.984	294.39	152.731	0.00014	0.00822	0.82684	0.16335	0.00145	0	19.068	4395.4	0.108	1219.19	3.06063	177.976	0.49769	5e-05	0	0.00073	0.46895	0.53026	0	-0.11574	0	0.00086	0.90307	0.09572	0.00034	0	-0.09301	0.00021	0.0005	0.90322	0.09583	0.00023	0
1	01:07:02	Chulpan_(rye)	S._cereale_Chulpan	KH2PO4	2021-04-02 16:50:36	1064190	0.22469	0	0.00011	0.00663	0.99307	0.00019	0	241.697	311.389	131.059	0.00011	0.00741	0.95846	0.03355	0.00048	0	20.072	4403	0.109	1444.86	2.91351	151.56	0.52242	0	0	0.00349	0.37449	0.62202	0	-0.03987	6e-05	0.00048	0.70851	0.29095	0	0	-0.03698	0.0002	0.00072	0.70812	0.29078	0.00017	0
1	01:07:03	Chulpan_(rye)	S._cereale_Chulpan	KH2PO4	2021-04-02 16:50:36	685793	0.20088	0	0	0.01063	0.98576	0.00361	0	273.487	335.151	136.166	0	0.02626	0.93332	0.03933	0.0011	0	13.213	2507.59	0.062	468.017	4.37432	184.835	0.50176	0	0	0.00234	0.45929	0.53837	0	-0.06252	0	0.00021	0.79726	0.20193	0.0006	0	-0.04557	0	0	0.79747	0.20203	0.00049	0
1	01:08:01	LD222_Rht17_NIL	T._durum_LD222_Rht17_NIL	KH2PO4	2021-04-02 16:50:36	818969	0.19773	0	6e-05	0.04602	0.95383	9e-05	0	254.808	294.106	146.603	0	0.00769	0.85342	0.13864	0.00025	0	16.852	3214.06	0.079	852.15	3.44907	183.374	0.56789	0	0	0.00134	0.25281	0.74585	0	-0.11796	0	0.00076	0.88302	0.11622	0	0	-0.08133	0	0.00057	0.88322	0.11605	0.00016	0
1	01:08:02	LD222_Rht17_NIL	T._durum_LD222_Rht17_NIL	KH2PO4	2021-04-02 16:50:36	848110	0.18688	0	0.00016	0.02124	0.97792	0.00067	0	254.554	295.398	146.647	0	0.01062	0.8967	0.09126	0.00142	0	19.047	3331.75	0.082	937.825	3.064	156.302	0.52097	0	8e-05	0.00402	0.33916	0.65673	0	-0.10869	0	0.00032	0.88841	0.11118	9e-05	0	-0.0831	0.00023	0.00117	0.88734	0.11127	0	0
1	01:08:03	LD222_Rht17_NIL	T._durum_LD222_Rht17_NIL	KH2PO4	2021-04-02 16:50:36	728239	0.22045	0	0	0.00901	0.98651	0.00448	0	267.737	309.772	140.05	0	0.00912	0.94601	0.04415	0.00073	0	16.248	2719.97	0.067	677.992	3.57362	145.217	0.5581	0.00021	0	0.00553	0.23797	0.75629	0	-0.09973	0	0.00018	0.88404	0.11569	9e-05	0	-0.06624	0	0.00176	0.88267	0.11502	0.00055	0
1	01:09:01	LD222_(tall_wheat)	LD222_recurrent_parent_(tall)	KH2PO4	2021-04-02 16:50:36	960162	0.24339	0	0	0.01276	0.98441	0.00283	0	326.389	334.029	132.354	0	0.02062	0.92576	0.05266	0.00096	0	19.977	2941.78	0.073	911.34	2.92668	199.483	0.57471	0	0	0.00292	0.24805	0.74903	0	-0.0563	0	0.00098	0.71348	0.28438	0.00115	0	-0.03744	0	0.0012	0.71326	0.28431	0.00123	0
1	01:09:02	LD222_(tall_wheat)	LD222_recurrent_parent_(tall)	KH2PO4	2021-04-02 16:50:36	1163220	0.22652	0	0	0.0172	0.98084	0.00197	0	319.312	386.302	134.922	0	0.01351	0.92016	0.0657	0.00063	0	21.028	3642.89	0.09	1174.18	2.78659	237.482	0.53281	0	0	0.0049	0.33589	0.65921	0	-0.05777	0	7e-05	0.754	0.24559	0.00034	0	-0.05053	0.00027	0.0007	0.7531	0.24594	0	0
1	01:09:03	LD222_(tall_wheat)	LD222_recurrent_parent_(tall)	KH2PO4	2021-04-02 16:50:36	1174380	0.22532	0	9e-05	0.02476	0.96854	0.00661	0	330.673	375.808	136.143	0.00016	0.01796	0.89923	0.08045	0.0022	0	22.649	3551.48	0.088	1123.89	2.59666	206.622	0.50227	0	0	0.01733	0.38911	0.59356	0	-0.06104	0	0.00044	0.7539	0.24471	0.00095	0	-0.05309	0	0.00236	0.75198	0.24484	0.00065	0.00017
2	01:01:01	Chulpan_(rye)	S._cereale_Chulpan	w/o_P	2021-04-02 16:57:34	143207	0.13987	0	0	0.03829	0.96171	0	0	158.252	218.39	154.713	0	0.0248	0.80925	0.1615	0.00446	0	17.468	904.933	0.022	255.303	3.33105	83.187	0.48081	0	0	0.00508	0.54021	0.45471	0	-0.11361	0	0	0.90417	0.09583	0	0	-0.09024	0	0	0.90417	0.09544	0.00039	0
2	01:01:02	Chulpan_(rye)	S._cereale_Chulpan	w/o_P	2021-04-02 16:57:34	173904	0.11076	0	0	0.02664	0.97336	0	0	187.968	219.536	155.195	0	0.02779	0.78615	0.18554	0.00051	0	16.044	925.179	0.023	232.365	3.61772	135.037	0.39149	0	0	0.00698	0.67521	0.31781	0	-0.08835	0	0	0.88691	0.11309	0	0	-0.08915	0	0	0.88691	0.11309	0	0
2	01:01:03	Chulpan_(rye)	S._cereale_Chulpan	w/o_P	2021-04-02 16:57:34	107846	0.09714	0	0	0.05254	0.94746	0	0	230.579	250.076	160.289	0	0.01257	0.79726	0.18376	0.00641	0	13.883	467.719	0.012	102.372	4.16719	125.922	0.34389	0	0	0.0299	0.88317	0.08693	0	-0.10035	0	0.00082	0.91999	0.07862	0.00056	0	-0.10577	0	0.00126	0.91956	0.07678	0.00103	0.00137
2	01:02:01	LD222_Rht17_NIL	T._durum_LD222_Rht17_NIL	w/o_P	2021-04-02 16:57:34	307468	0.16524	0	0	0.07814	0.92186	0	0	247.68	269.617	151.509	0	0.01448	0.77883	0.20505	0.00164	0	19.176	1241.39	0.031	372.89	3.04404	155.702	0.50265	0	0	0.0015	0.46825	0.53025	0	-0.12262	0	0.00286	0.8599	0.13723	0	0	-0.1069	0.00016	0.015	0.84761	0.13699	0.00024	0
2	01:02:02	LD222_Rht17_NIL	T._durum_LD222_Rht17_NIL	w/o_P	2021-04-02 16:57:34	348385	0.1605	0	0	0.027	0.973	0	0	225.997	268.321	149.642	0	0.0251	0.84186	0.13061	0.00243	0	26.199	1541.54	0.038	655.948	2.26489	120.197	0.47045	0	0	0.00667	0.46862	0.52471	0	-0.10683	0	0.00027	0.88069	0.11904	0	0	-0.09338	0.00051	0.00252	0.87793	0.11904	0	0
2	01:02:03	LD222_Rht17_NIL	T._durum_LD222_Rht17_NIL	w/o_P	2021-04-02 16:57:34	294916	0.14427	0	0	0.03529	0.96471	0	0	245.265	271.261	153.671	0	0.01277	0.83275	0.1521	0.00239	0	18.096	1202.44	0.03	320.48	3.21903	143.89	0.43611	0	0	0.02702	0.57776	0.39522	0	-0.11561	0	0	0.90847	0.09153	0	0	-0.10556	0	0.00259	0.90588	0.09042	0.00111	0
2	01:03:01	LD222_(tall_wheat)	LD222_recurrent_parent_(tall)	w/o_P	2021-04-02 16:57:34	329704	0.16569	0	0	0.02289	0.97711	0	0	299.669	335.832	149.158	0.00036	0.02987	0.77907	0.18807	0.00262	0	18.475	1100.23	0.027	319.675	3.15537	125.138	0.47502	0	0	0.01018	0.50464	0.48519	0	-0.10706	0.00027	0.00038	0.84694	0.15241	0	0	-0.10041	0.00117	0.00193	0.84445	0.15245	0	0
2	01:03:02	LD222_(tall_wheat)	LD222_recurrent_parent_(tall)	w/o_P	2021-04-02 16:57:34	489070	0.14116	0	0	0.03875	0.96125	0	0	301.454	358.117	153.425	0.00015	0.01061	0.80632	0.17818	0.00473	0	20.794	1622.37	0.04	510.498	2.81661	189.485	0.42962	0.0003	0	0.01251	0.61734	0.36985	0	-0.10536	0	0.0009	0.89043	0.10866	0	0	-0.10369	0.00075	0.00327	0.88732	0.10866	0	0
2	01:03:03	LD222_(tall_wheat)	LD222_recurrent_parent_(tall)	w/o_P	2021-04-02 16:57:34	210450	0.19062	0	0	0.03075	0.96319	0.00605	0	237.005	283	135.998	0	0.0527	0.86088	0.08245	0.00398	0	29.835	887.955	0.022	401.992	2.00992	128.335	0.50376	0	0	0.02069	0.3851	0.59421	0	-0.05824	0	0.00939	0.69317	0.29563	0.00181	0	-0.04307	0	0	0.70256	0.29722	0.00022	0
2	01:04:01	Chulpan_(rye)	S._cereale_Chulpan	Phosphorite	2021-04-02 16:57:34	479800	0.14607	0	0.00015	0.05499	0.94486	0	0	206.372	270.908	156.431	0	0.01071	0.78179	0.20563	0.00187	0	14.609	2324.93	0.057	507.034	3.96415	161.522	0.5018	0	0	0.00324	0.4129	0.58386	0	-0.1251	0	0.00245	0.89134	0.10621	0	0	-0.10178	0.00015	0.00563	0.88801	0.10621	0	0
2	01:04:02	Chulpan_(rye)	S._cereale_Chulpan	Phosphorite	2021-04-02 16:57:34	718369	0.11618	0	0	0.03101	0.96899	0	0	229.822	286.23	160.447	0	0.00317	0.78714	0.20901	0.00069	0	12.467	3125.76	0.077	612.316	4.63136	155.637	0.40497	0	0.00027	0.00765	0.68958	0.30251	0	-0.117	0	0	0.95602	0.04398	0	0	-0.11458	0.00016	0.0005	0.95536	0.04359	0.00029	0.00011
2	01:04:03	Chulpan_(rye)	S._cereale_Chulpan	Phosphorite	2021-04-02 16:57:34	357315	0.16946	0	0	0.03886	0.96114	0	0	202.003	261.459	150.697	0	0.0139	0.86494	0.11986	0.00131	0	17.952	1768.86	0.044	485.489	3.24411	124.81	0.49936	0	0	0.01392	0.43726	0.54882	0	-0.11682	0	0	0.91956	0.0798	0.00064	0	-0.08382	0	0	0.91956	0.07863	0.0016	0.00021
2	01:05:01	LD222_Rht17_NIL	T._durum_LD222_Rht17_NIL	Phosphorite	2021-04-02 16:57:34	390339	0.1364	0	0.00143	0.06198	0.93659	0	0	257.556	306.072	163.412	0	0.01139	0.68616	0.30031	0.00213	0	17.43	1515.55	0.037	423.141	3.33807	186.59	0.48033	0	0	0.00355	0.51269	0.48375	0	-0.16105	0	0.00185	0.93257	0.06558	0	0	-0.14084	0.00091	0.00342	0.93008	0.06558	0	0
2	01:05:02	LD222_Rht17_NIL	T._durum_LD222_Rht17_NIL	Phosphorite	2021-04-02 16:57:34	477092	0.15224	0	0	0.04017	0.95983	0	0	289.16	311.771	157.463	0	0.01004	0.79296	0.19561	0.00138	0	17.573	1649.92	0.041	444.459	3.3117	204.033	0.49002	0	0	0.00622	0.50898	0.48481	0	-0.13855	0	0	0.94507	0.05493	0	0	-0.1215	0	0.00113	0.94394	0.05493	0	0
2	01:05:03	LD222_Rht17_NIL	T._durum_LD222_Rht17_NIL	Phosphorite	2021-04-02 16:57:34	380508	0.16515	0	0.00119	0.05344	0.94517	0.00019	0	244.168	272.492	151.075	0	0.01817	0.8136	0.16301	0.00522	0	17.18	1558.39	0.038	423.884	3.38515	142.149	0.47007	0	0	0.01517	0.5042	0.48064	0	-0.11341	0	0	0.90172	0.09828	0	0	-0.10112	0	0.00078	0.90094	0.09799	0.00029	0
2	01:06:01	LD222_(tall_wheat)	LD222_recurrent_parent_(tall)	Phosphorite	2021-04-02 16:57:34	527204	0.17716	0	0.00092	0.03919	0.9599	0	0	290.476	329.055	146.676	0	0.00961	0.85721	0.13027	0.00291	0	12.305	1814.96	0.045	354.978	4.69132	197.456	0.51757	0	0	0.00135	0.39245	0.6062	0	-0.10481	0	0.00017	0.88506	0.11477	0	0	-0.08147	0.00037	0.00641	0.87845	0.11388	0.0009	0
2	01:06:02	LD222_(tall_wheat)	LD222_recurrent_parent_(tall)	Phosphorite	2021-04-02 16:57:34	697976	0.16323	0	0.00013	0.01929	0.98058	0	0	296.093	359.566	149.323	0	0.01484	0.86901	0.11494	0.00121	0	19.382	2357.29	0.058	712.619	3.0129	209.758	0.49433	0	0	0.00329	0.48533	0.51138	0	-0.10705	0.00034	0.00029	0.90227	0.09709	0	0	-0.0879	0.00034	0.00043	0.90213	0.09709	0	0
2	01:06:03	LD222_(tall_wheat)	LD222_recurrent_parent_(tall)	Phosphorite	2021-04-02 16:57:34	233664	0.18531	0	0	0.04792	0.95118	0.0009	0	284.216	294.657	142.524	0	0.01726	0.87845	0.09756	0.00674	0	16.736	822.136	0.02	218.301	3.47231	157.755	0.47327	0	0	0.02415	0.47131	0.50454	0	-0.09166	0	0	0.839	0.16071	0.00028	0	-0.07052	0	0.00272	0.83629	0.16071	0	0.00028
2	01:07:01	Chulpan_(rye)	S._cereale_Chulpan	KH2PO4	2021-04-02 16:57:34	749180	0.15256	0	0	0.04535	0.95322	0.00143	0	226.647	298.21	155.126	0	0.00865	0.77738	0.21294	0.00104	0	16.515	3305.5	0.082	825.473	3.51728	157.806	0.50125	0	0	0.00258	0.46543	0.53199	0	-0.12467	0	0.00228	0.89012	0.10751	9e-05	0	-0.10318	5e-05	0.00574	0.88662	0.10727	0.00033	0
2	01:07:02	Chulpan_(rye)	S._cereale_Chulpan	KH2PO4	2021-04-02 16:57:34	1294610	0.18646	0	0	0.01473	0.98527	0	0	245.636	310.463	143.287	7e-05	0.00722	0.92739	0.06492	0.0004	0	20.25	5270.46	0.13	1643.87	2.88891	147.218	0.47901	5e-05	9e-05	0.00877	0.47283	0.51826	0	-0.08748	0.00021	0.00039	0.84432	0.15508	0	0	-0.07707	0.00047	0.00075	0.84375	0.15498	6e-05	0
2	01:07:03	Chulpan_(rye)	S._cereale_Chulpan	KH2PO4	2021-04-02 16:57:34	857097	0.18465	0	0	0.01216	0.98633	0.00152	0	280.951	334.408	139.671	0	0.01717	0.93415	0.04782	0.00086	0	14.079	3050.7	0.075	620.855	4.11032	170.096	0.47856	0	0	0.00568	0.51688	0.47744	0	-0.07097	0	0.00024	0.84442	0.1543	0.00104	0	-0.05483	0.00015	0.00042	0.84409	0.15407	0.00097	0.0003
2	01:08:01	LD222_Rht17_NIL	T._durum_LD222_Rht17_NIL	KH2PO4	2021-04-02 16:57:34	897047	0.18976	0	0	0.03641	0.96168	0.00191	0	258.913	296.401	149.84	0	0.0105	0.82654	0.16068	0.00229	0	18.106	3464.67	0.085	984.702	3.21744	188.461	0.54993	0	0	0.00166	0.32864	0.6697	0	-0.12632	0	0.00175	0.85831	0.13995	0	0	-0.09736	0	0.00215	0.8579	0.13995	0	0
2	01:08:02	LD222_Rht17_NIL	T._durum_LD222_Rht17_NIL	KH2PO4	2021-04-02 16:57:34	749098	0.1944	0	9e-05	0.01241	0.98723	0.00027	0	242.94	289.842	147.696	0	0.00418	0.94769	0.04768	0.00046	0	17.287	3083.48	0.076	835.935	3.36478	153.262	0.54362	0	0	0.00456	0.29177	0.70367	0	-0.13479	0	0.00118	0.94746	0.05136	0	0	-0.09082	0	0.00055	0.9481	0.05125	0.00011	0
2	01:08:03	LD222_Rht17_NIL	T._durum_LD222_Rht17_NIL	KH2PO4	2021-04-02 16:57:34	763092	0.20966	0	7e-05	0.02529	0.97078	0.00386	0	270.876	332.985	143.229	0	0.01315	0.89535	0.08892	0.00258	0	16.954	2817.12	0.07	714.691	3.42885	162.138	0.52845	0	0	0.00834	0.37467	0.61699	0	-0.09658	0	0	0.86328	0.13576	0.00096	0	-0.06969	0.00022	0.00032	0.86274	0.13507	0.00151	0.00014
2	01:09:01	LD222_(tall_wheat)	LD222_recurrent_parent_(tall)	KH2PO4	2021-04-02 16:57:34	990987	0.23335	0	0.00083	0.02826	0.96935	0.00156	0	323.678	363.323	135.574	0.0002	0.01396	0.88454	0.09939	0.00191	0	19.915	3061.64	0.076	908.1	2.93552	237.817	0.56928	0	6e-05	0.00229	0.26496	0.73269	0	-0.06823	0.00041	0.00657	0.70611	0.28691	0	0	-0.05226	0.00015	0.00401	0.70894	0.28683	7e-05	0
2	01:09:02	LD222_(tall_wheat)	LD222_recurrent_parent_(tall)	KH2PO4	2021-04-02 16:57:34	1273570	0.20275	0	8e-05	0.02712	0.9728	0	0	325.125	391.909	139.013	0.00018	0.01378	0.9018	0.08117	0.00307	0	19.426	3917.16	0.097	1216.32	3.00635	224.214	0.49984	0	7e-05	0.01413	0.35763	0.62817	0	-0.07488	0	8e-05	0.8436	0.15623	9e-05	0	-0.05725	7e-05	0.00055	0.84307	0.15547	0.00077	7e-05
2	01:09:03	LD222_(tall_wheat)	LD222_recurrent_parent_(tall)	KH2PO4	2021-04-02 16:57:34	762562	0.29195	0	0	0.00562	0.98267	0.01171	0	305.87	339.961	125.279	0	0.02858	0.95514	0.01542	0.00085	0	20.537	2493.09	0.062	764.848	2.85029	208.324	0.58245	0	0	0.00439	0.21478	0.78084	0	-0.0274	0	0.0011	0.6386	0.35841	0.00189	0	-0.01204	0	0.0006	0.63911	0.35775	0.00237	0.00018
1	02:01:01	Chulpan_(rye)	S._cereale_Chulpan	w/o_P	2021-04-02 17:25:44	125567	0.18828	0	0	0.02731	0.97269	0	0	191.133	223.339	128.511	0	0.04208	0.85075	0.10263	0.00454	0	18.193	656.965	0.016	183.641	3.20252	157.634	0.48964	0	0	0.00207	0.47157	0.52636	0	-0.00626	0	0	0.51855	0.48145	0	0	-0.0171	0	0	0.51855	0.48145	0	0
1	02:01:02	Chulpan_(rye)	S._cereale_Chulpan	w/o_P	2021-04-02 17:25:44	225571	0.09189	0	0	0.07102	0.92898	0	0	236.461	262.617	162.637	0	0.01935	0.73724	0.24088	0.00254	0	15.744	953.945	0.024	247.69	3.68495	159.19	0.36653	0	0	0.00517	0.78849	0.20634	0	-0.09725	0	0	0.9297	0.0703	0	0	-0.10354	0	0.00222	0.92748	0.0703	0	0
1	02:01:03	Chulpan_(rye)	S._cereale_Chulpan	w/o_P	2021-04-02 17:25:44	118505	0.16932	0	0.00081	0.01521	0.98398	0	0	180.942	205.958	144.133	0.00123	0.01888	0.91281	0.0654	0.00168	0	12.509	654.931	0.016	117.976	4.61626	134.399	0.51474	0	0	0.00409	0.46762	0.52829	0	-0.10196	0.0003	0.00302	0.86065	0.13544	0.00059	0	-0.07465	0.00211	0.00607	0.85575	0.13607	0	0
1	02:02:01	LD222_Rht17_NIL	T._durum_LD222_Rht17_NIL	w/o_P	2021-04-02 17:25:44	241090	0.1262	0.00081	0.00188	0.09752	0.89979	0	0	218.431	235.119	162.114	0	0.0269	0.68173	0.29003	0.00134	0	26.61	1103.73	0.027	473.704	2.23243	134.707	0.48061	0.0003	0	0.00316	0.46004	0.5365	0	-0.15223	0	0.00342	0.88902	0.10721	0.00035	0	-0.13607	0.00144	0.00325	0.88772	0.10758	0	0
1	02:02:02	LD222_Rht17_NIL	T._durum_LD222_Rht17_NIL	w/o_P	2021-04-02 17:25:44	270337	0.15328	0	0	0.0119	0.9881	0	0	248.197	272.859	151.927	0	0.00812	0.873	0.11888	0	0	13.262	1089.21	0.027	226.202	4.35826	151.166	0.45791	0	0	0.00288	0.60178	0.39534	0	-0.11324	0	0	0.92345	0.07655	0	0	-0.10782	0	0	0.92345	0.07655	0	0
1	02:02:03	LD222_Rht17_NIL	T._durum_LD222_Rht17_NIL	w/o_P	2021-04-02 17:25:44	282220	0.163	0	0	0.01992	0.97934	0.00073	0	254.62	287.846	141.505	0	0.02747	0.90075	0.07093	0.00085	0	22.644	1108.4	0.027	388.526	2.59721	171.093	0.48781	0	0	0.00327	0.47407	0.52265	0	-0.07821	0	0	0.80039	0.19867	0.00094	0	-0.06113	0	0	0.80039	0.19867	0.00094	0
1	02:03:01	LD222_(tall_wheat)	LD222_recurrent_parent_(tall)	w/o_P	2021-04-02 17:25:44	285337	0.13686	0	0.00132	0.13249	0.86419	0.002	0	213.036	227.438	157.842	0	0.0186	0.70679	0.26848	0.00614	0	27.989	1339.38	0.033	591.259	2.13071	92.538	0.47284	0	0	0.01598	0.44723	0.53678	0	-0.13256	0	0.03079	0.81073	0.15848	0	0	-0.13319	0	0.05971	0.78181	0.15848	0	0
1	02:03:02	LD222_(tall_wheat)	LD222_recurrent_parent_(tall)	w/o_P	2021-04-02 17:25:44	462193	0.15168	0	0	0.04324	0.95676	0	0	297.486	329.303	145.537	0	0.01735	0.85722	0.12321	0.00222	0	24.534	1553.66	0.038	624.843	2.4081	189.933	0.44121	0	0	0.0145	0.57259	0.41291	0	-0.07708	0	0.0002	0.84287	0.15694	0	0	-0.07473	0.00056	0.00337	0.83913	0.15609	0.00085	0
1	02:03:03	LD222_(tall_wheat)	LD222_recurrent_parent_(tall)	w/o_P	2021-04-02 17:25:44	394206	0.19782	0	0	0.01922	0.96909	0.01169	0	274.984	298.018	137.46	0	0.02881	0.91233	0.05532	0.00354	0	25.124	1433.56	0.035	552.814	2.35509	172.145	0.50517	0	0	0.01875	0.36175	0.6195	0	-0.07025	0	0.00157	0.78117	0.21709	0.00017	0	-0.05585	0	0.00123	0.7815	0.21726	0	0
1	02:04:01	Chulpan_(rye)	S._cereale_Chulpan	Phosphorite	2021-04-02 17:25:44	484488	0.12515	0	0	0.07948	0.92034	0.00019	0	195.309	245.32	161.194	0	0.00776	0.71024	0.28104	0.00097	0	15.33	2480.62	0.061	596.023	3.78198	139.357	0.45951	0	0	0.00091	0.62735	0.37173	0	-0.12258	0	0.00049	0.92761	0.07191	0	0	-0.11185	0	0.0012	0.92689	0.07176	0.00015	0
1	02:04:02	Chulpan_(rye)	S._cereale_Chulpan	Phosphorite	2021-04-02 17:25:44	714057	0.1398	0	0	0.03173	0.96827	0	0	238.005	281.846	154.721	0.0001	0.01023	0.85153	0.1371	0.00104	0	17.513	3000.18	0.074	773.456	3.32264	157.155	0.45804	0	0.00012	0.00886	0.51049	0.48053	0	-0.11271	0	0	0.92346	0.07654	0	0	-0.09357	0	0.00027	0.92319	0.07553	0.001	0
1	02:04:03	Chulpan_(rye)	S._cereale_Chulpan	Phosphorite	2021-04-02 17:25:44	381828	0.17004	0.00045	0.00034	0.02822	0.97046	0.00053	0	174.523	221.069	142.957	0	0.0167	0.87731	0.10063	0.00537	0	22.496	2187.83	0.054	716.946	2.61332	118.474	0.49416	0	0	0.0163	0.45757	0.52613	0	-0.08184	0.00046	0.00092	0.83395	0.16443	0.00024	0	-0.05926	0	0.00092	0.83441	0.16454	0.00012	0
1	02:05:01	LD222_Rht17_NIL	T._durum_LD222_Rht17_NIL	Phosphorite	2021-04-02 17:25:44	435678	0.13609	0	0.00122	0.04716	0.95162	0	0	275.781	316.559	161.099	0	0.01171	0.7459	0.23919	0.0032	0	19.322	1579.79	0.039	470.624	3.0219	169.708	0.47987	0.00012	0.00014	0.00224	0.4835	0.51399	0	-0.14927	0	0.00079	0.92991	0.0693	0	0	-0.12774	0.00104	0.00179	0.92787	0.06891	0.00039	0
1	02:05:02	LD222_Rht17_NIL	T._durum_LD222_Rht17_NIL	Phosphorite	2021-04-02 17:25:44	541364	0.1384	0	0	0.02907	0.97093	0	0	295.351	335.086	154.858	0	0.01179	0.85878	0.1269	0.00253	0	13.158	1832.95	0.045	380.953	4.3921	171.918	0.43527	0	0	0.01476	0.58004	0.40521	0	-0.12078	0	0	0.91809	0.08191	0	0	-0.10911	0	0.00102	0.91707	0.08178	0.00013	0
1	02:05:03	LD222_Rht17_NIL	T._durum_LD222_Rht17_NIL	Phosphorite	2021-04-02 17:25:44	368606	0.19795	0	0	0.01976	0.97992	0.00032	0	274.968	326.943	139.047	0	0.01662	0.93417	0.04432	0.00489	0	13.405	1340.54	0.033	236.308	4.31274	184.574	0.52715	0	0	0.00642	0.30817	0.68541	0	-0.08731	0	0	0.87449	0.1252	0.00031	0	-0.05391	0	0	0.87449	0.12369	0.00151	0.00031
1	02:06:01	LD222_(tall_wheat)	LD222_recurrent_parent_(tall)	Phosphorite	2021-04-02 17:25:44	545456	0.13572	0.00031	0.00105	0.04622	0.95166	0.00077	0	332.48	396.122	155.277	0	0.02979	0.77145	0.19506	0.00369	0	15.989	1640.57	0.04	416.628	3.62982	225.589	0.44168	0.00013	0	0.00696	0.60475	0.38816	0	-0.11402	0	0.00049	0.84357	0.15562	0.00031	0	-0.10498	0.00088	0.00079	0.8424	0.15594	0	0
1	02:06:02	LD222_(tall_wheat)	LD222_recurrent_parent_(tall)	Phosphorite	2021-04-02 17:25:44	567378	0.15284	0	0.0002	0.02272	0.97696	0.00012	0	345.227	376.762	145.119	0.00046	0.03655	0.86794	0.09187	0.00318	0	14.415	1643.49	0.041	341.888	4.01632	205.564	0.42679	0	0	0.01646	0.64477	0.33877	0	-0.08053	0.00042	0.00022	0.85132	0.14803	0	0	-0.07672	0.00079	0.00174	0.84944	0.14756	0.00047	0
1	02:06:03	LD222_(tall_wheat)	LD222_recurrent_parent_(tall)	Phosphorite	2021-04-02 17:25:44	659322	0.17275	0	0	0.02828	0.97124	0.00048	0	323.225	387.678	139.998	0	0.04311	0.8661	0.08687	0.00391	0	23.091	2039.83	0.05	717.502	2.54952	201.154	0.45541	0	0	0.02532	0.53465	0.44003	0	-0.0675	0	0.00038	0.80022	0.1993	0.0001	0	-0.05715	0	0.00048	0.80012	0.199	0.0004	0
1	02:07:01	Chulpan_(rye)	S._cereale_Chulpan	KH2PO4	2021-04-02 17:25:44	619455	0.20373	0	0	0.02126	0.97797	0.00077	0	185.214	241.713	138.486	0.00017	0.00788	0.90757	0.08235	0.00203	0	15.899	3344.53	0.083	804.103	3.65001	131.825	0.54921	0	0	0.00069	0.31526	0.68404	0	-0.07341	0	0.00039	0.81133	0.18818	0.0001	0	-0.05582	0	0.00077	0.81095	0.18817	0.00011	0
1	02:07:02	Chulpan_(rye)	S._cereale_Chulpan	KH2PO4	2021-04-02 17:25:44	789725	0.14955	0.00012	0	0.02891	0.97097	0	0	263.78	303.156	149.205	0	0.00579	0.88983	0.10257	0.00181	0	14.724	2993.88	0.074	679.577	3.9338	188.591	0.48626	0.00013	0	0.00601	0.50167	0.49218	0	-0.09972	0	0	0.92875	0.07118	7e-05	0	-0.07767	0.00033	0.00061	0.92788	0.07111	7e-05	0
1	02:07:03	Chulpan_(rye)	S._cereale_Chulpan	KH2PO4	2021-04-02 17:25:44	797809	0.22624	0	0	0.01302	0.98513	0.00186	0	231.41	271.26	129.377	0	0.02883	0.93925	0.03097	0.00095	0	28.332	3447.6	0.085	1417.62	2.107	125.907	0.543	0	0	0.00593	0.32196	0.67211	0	-0.03647	0	0.00066	0.69283	0.30572	0.00079	0	-0.0248	0	0.00212	0.69136	0.30478	0.00174	0
1	02:08:01	LD222_Rht17_NIL	T._durum_LD222_Rht17_NIL	KH2PO4	2021-04-02 17:25:44	655346	0.20463	0	0	0.02171	0.97812	0.00017	0	236.075	290.671	145.047	0.00024	0.00789	0.85194	0.1384	0.00152	0	15.287	2776.01	0.068	663.925	3.79242	120.912	0.56226	0	0	0.00343	0.24244	0.75412	0	-0.1141	0	0.00038	0.87088	0.12874	0	0	-0.08626	0.00028	0.00164	0.86934	0.12874	0	0
1	02:08:02	LD222_Rht17_NIL	T._durum_LD222_Rht17_NIL	KH2PO4	2021-04-02 17:25:44	889303	0.17131	0	6e-05	0.02051	0.97944	0	0	260.373	319.014	150.297	0.00012	0.01129	0.87981	0.10659	0.00219	0	14.756	3415.49	0.084	741.351	3.92567	152.767	0.48681	0	7e-05	0.01589	0.40492	0.57912	0	-0.12167	0	0.00029	0.90335	0.09636	0	0	-0.10161	0.00056	0.0022	0.90088	0.09636	0	0
1	02:08:03	LD222_Rht17_NIL	T._durum_LD222_Rht17_NIL	KH2PO4	2021-04-02 17:25:44	572460	0.23714	0	0	0.01339	0.97752	0.00909	0	226.361	306.012	136.091	0	0.01994	0.927	0.05092	0.00214	0	22.063	2528.97	0.062	853.091	2.66199	164.705	0.55221	0	0	0.00664	0.3189	0.67446	0	-0.07346	0	0.00023	0.79475	0.20332	0.0017	0	-0.04974	0	0	0.79498	0.20417	0.00085	0
1	02:09:01	LD222_(tall_wheat)	LD222_recurrent_parent_(tall)	KH2PO4	2021-04-02 17:25:44	1323340	0.16981	0	8e-05	0.02726	0.9726	7e-05	0	322.693	419.706	152.61	0	0.01161	0.86442	0.12224	0.00173	0	23.923	4100.93	0.101	1513.79	2.46586	170.026	0.50128	0	0	0.00986	0.37477	0.61537	0	-0.1352	0	0.00023	0.90465	0.09512	0	0	-0.10268	0	0.00151	0.90337	0.09504	8e-05	0
[truncated: 461 more rows]

## Sheet: Conventional phenotyping traits
unit	date	Treatment	Genotype	Dry matter of leaves, g	Dry matter of roots, g	Dry matter total, g	Tiller number	Leaf area total, cm2	Leaf area green, cm2	Leaf scenescence area, cm2	pH H2O
[truncated: 27 more rows]

[truncated: 1 more sheets: Sample size]
