# Supplementary material for: Evaluation of phosphate rock as the only source of phosphorus for the growth of tall and semi-dwarf durum wheat and rye plants using digital phenotyping
Source: PeerJ journal article supplement (doi:10.7717/peerj.15972), 2023-08-29

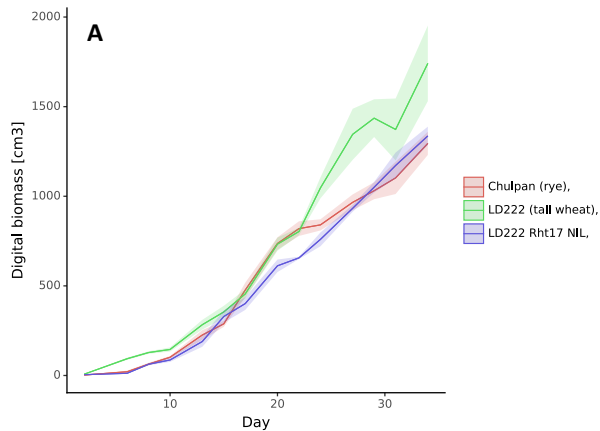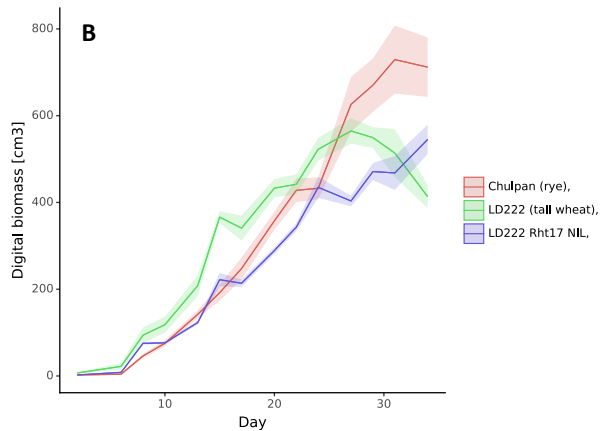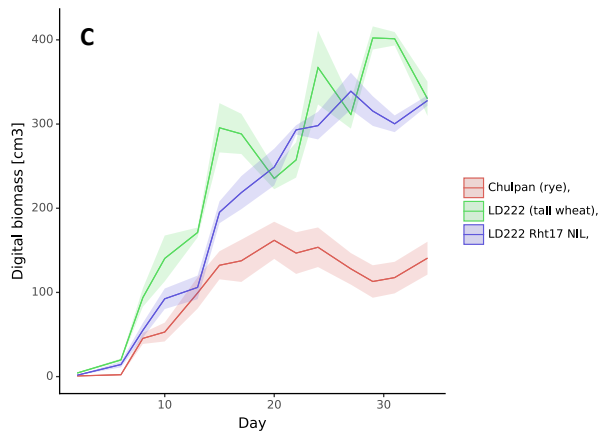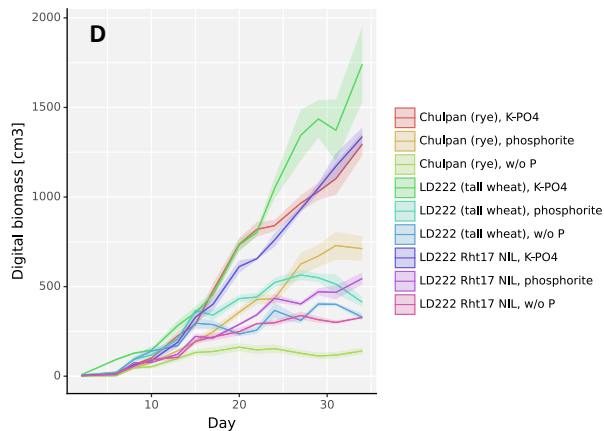

Supplement: Supplemental_Figure_S2.pdf [file Supplemental_Figure_S2.pdf]
